# Supplementary material for: Synthesis of naphthodihydrofurans via an iron(iii)-catalyzed reduction radical cascade reaction
Source: Royal Society of Chemistry journal article supplement (doi:10.1039/d1qo01041g), 2021-01-01

## Supporting Information

For

### Synthesis of Naphthodihydrofurans via Iron(III)-catalyzed Reduction Radical Cascade Reaction

Hua Zhang,<sup>a,b,c</sup> Bei Wang,<sup>a,b,c</sup> Hong Xu,<sup>a,b,c</sup> Fu-Yu Li,<sup>a,b,c</sup> Ji-Yu Wang<sup>\*a,b</sup>

<sup>a</sup> Department of Chemistry, Xihua University, P. R. China

<sup>b</sup> Chengdu Institute of Organic Chemistry, Chinese Academy of Sciences, Chengdu 610041, P. R. China.

<sup>c</sup> University of Chinese Academy of Sciences, Beijing 100049, P. R. China.

\* E-mail: [Jiyuwang@cioc.ac.cn](mailto:Jiyuwang@cioc.ac.cn).

### Contents

|                                            |          |
|--------------------------------------------|----------|
| 1. General Information                     | S2-S3    |
| 2. Substrate of Synthesis                  | S3-S5    |
| 3. Typical Synthesis Procedure of 3        | S6       |
| 4. Optimization of the Reaction Conditions | S6-S7    |
| 5. Typical Synthesis Procedure of 5a       | S7-S8    |
| 6. Typical Synthesis Procedure of 6a       | S8       |
| 7. Characterization of 3, 4a, 5a, 6a       | S8-S28   |
| 8. X-Ray Analysis                          | S29-S46  |
| 9. References                              | S46-S47  |
| 10. Copies of NMR Spectra                  | S48-S125 |

## 1. General Information:

All template reaction experiments were carried out under atmospheric conditions. Thin layer chromatography was carried out in the ultraviolet light using a GF-254 silica gel plate. Column chromatography was carried out using 200-300 mesh silica gel.  $^1\text{H}$  NMR,  $^{13}\text{C}$  NMR and  $^{19}\text{F}$  NMR spectra were recorded at 400 MHz on an Agilent spectrometer.  $\text{CDCl}_3$  and  $\text{DMSO-d}_6$  were used as solvent. Chemical shifts were referenced relative to residual solvent. Coupling constants (J) were reported in Hertz (Hz). HRMS were performed on a Thermo Scientific LTQ Orbitrap XL instrument. Melting points were measured with micro melting point apparatus.  $\text{FeCl}_3$  (Adamas, 99%),  $\text{Fe}(\text{acac})_3$  (HX-R, 99.5%),  $\text{Fe}(\text{ox})_3 \cdot 6\text{H}_2\text{O}$  (Alfa Aesar),  $\text{PhSiH}_3$  (Adamas, 97%),  $\text{Ph}_2\text{SiH}_2$  (Adamas, 97%), EtOH (GHTECH, 99.7%), 2-methylprop-2-en-1-ol (**2a**, Adamas, 98%), 3-methylbut-2-en-1-ol (**2q**, Macklin, 98%) were commercial available, and the naphthoquinone derivatives (**1a-1r**) were prepared according to literature.<sup>[1, 2, 3]</sup> The allyl alcohols (**2b-2p**, **2r-2s**) could be easily prepared according to literature.<sup>[4, 5, 6, 7]</sup>

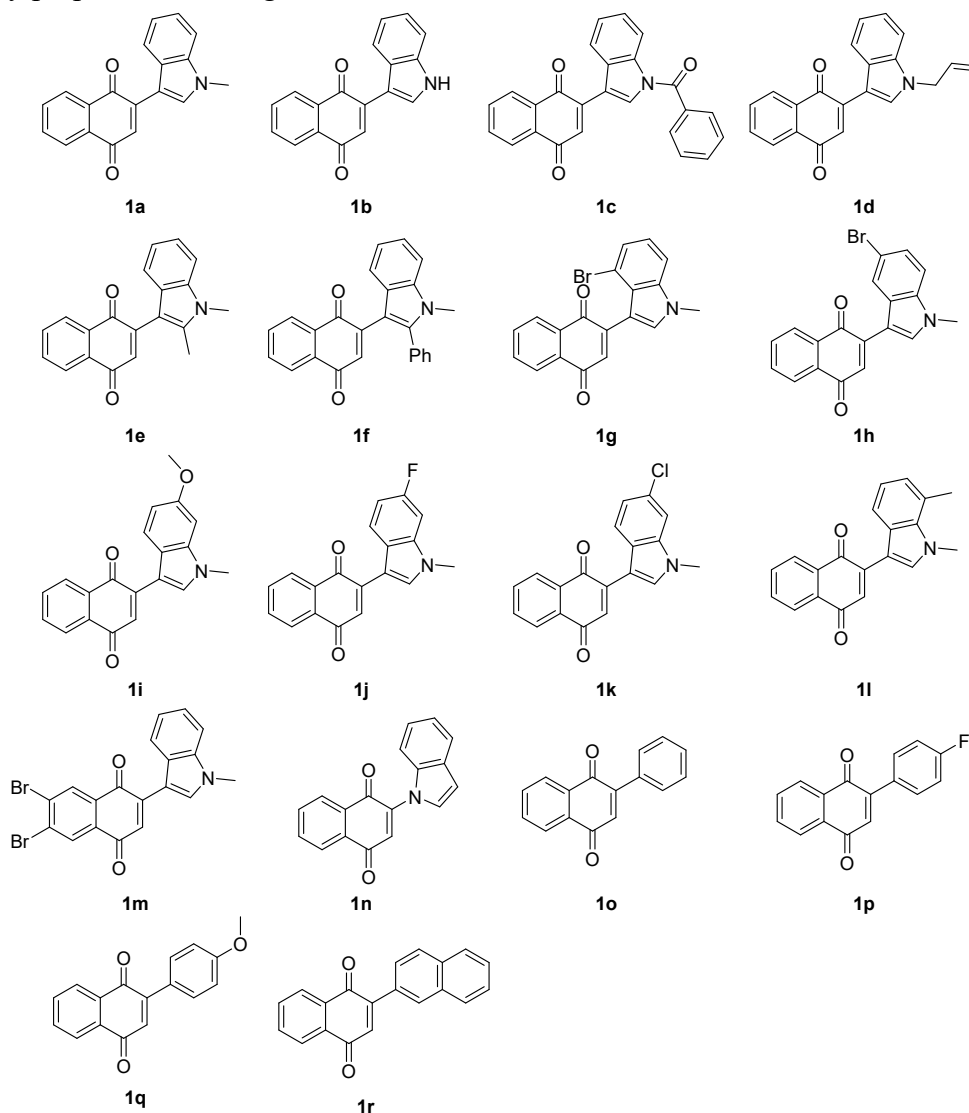

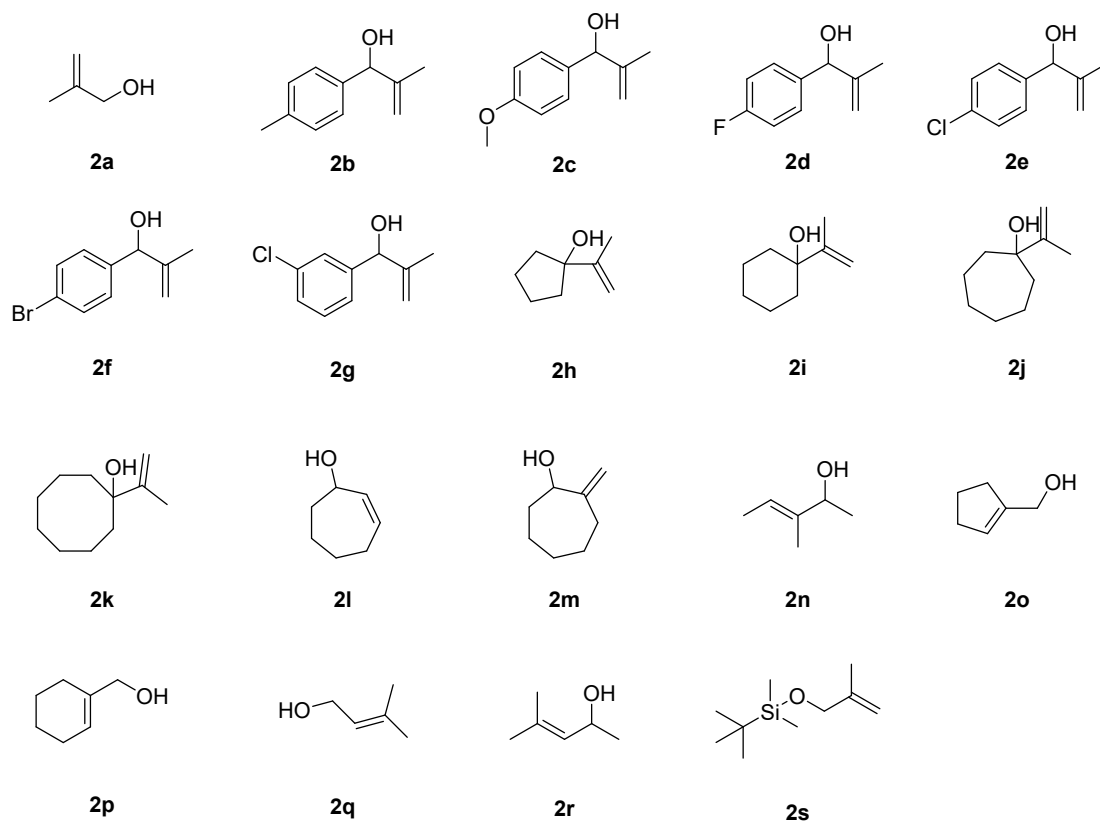

## 2. Substrate synthesis:

### (a) Synthesis of compounds **1a-1m**<sup>[1]</sup>

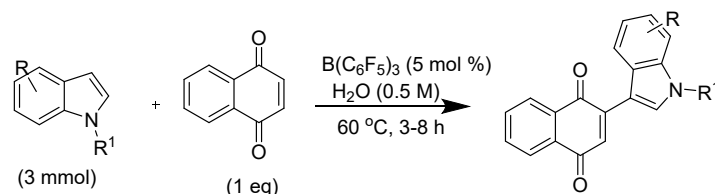

Indole (3 mmol), naphthoquinone (3 mmol),  $(\text{C}_6\text{F}_5)_3\text{B}$  (77 mg, 5 mol%) were sequentially weighed into the reaction flask, then 6ml of water was added, and the reaction was heated to 60°C for 3-8h. After the reaction was completed, the aqueous phase was extracted three times with ethyl acetate. The organic phase was dried with anhydrous magnesium sulfate. The solvent was evaporated to dryness under reduced pressure, and the product was purified by column chromatography using ethyl acetate/petroleum ether as the eluent to obtain **1a-1m**. If the product is not pure, it can be recrystallized with ethyl acetate.

### (b) Synthesis of compounds **1n**<sup>[2]</sup>

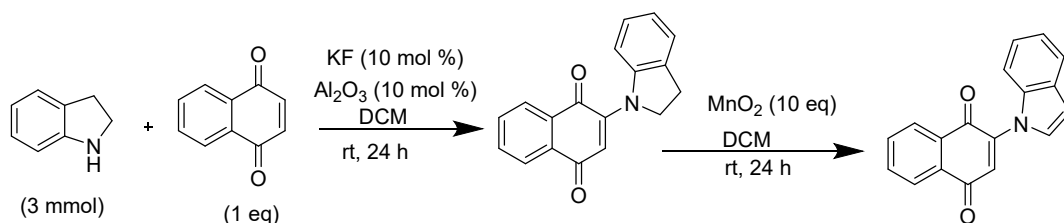

Indoline (3 mmol), naphthoquinone (3 mmol), KF (17 mg, 10 mol%), Al<sub>2</sub>O<sub>3</sub> (31 mg, 10 mol%) were sequentially weighed into the reaction flask. Then 15ml of dichloromethane was added and incubated at room temperature for 24h. After the reaction was completed, it was filtered, and the filtrate was evaporated to dryness under reduced pressure. The residue was dissolved in ethyl acetate and frozen in the refrigerator to recrystallize. Filter and dry the filter cake. Add the obtained filter cake to the reaction flask and dissolve it with dichloromethane. Add manganese dioxide to the reaction flask and keep it warm at room temperature for 24 hours. After the reaction was completed, the aqueous phase was extracted three times with DCM. The organic phase was dried with anhydrous magnesium sulfate. The solvent was evaporated to dryness under reduced pressure, and the product was purified by column chromatography using ethyl acetate/petroleum ether as the eluent to obtain **1n**.

#### (a) Synthesis of compounds **1o-1r**<sup>[3]</sup>

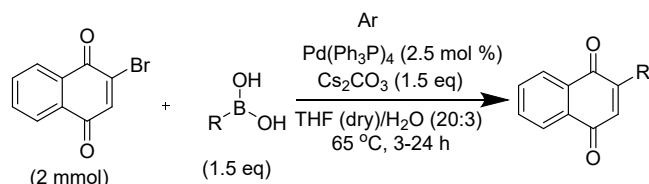

Indole (3 mmol), naphthoquinone (3 mmol), (C<sub>6</sub>F<sub>5</sub>)<sub>3</sub>B (77 mg, 5 mol%) were sequentially weighed into the reaction flask, then 6ml of water was added, and the reaction was heated to 60°C for 3-8h. After the reaction was completed, the aqueous phase was extracted three times with ethyl ace

#### (b) Synthesis of compounds **2b-2k**<sup>[4]</sup>

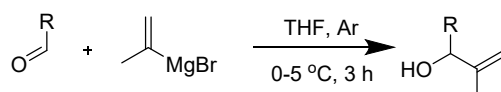

The reaction tube was filled with argon gas, and aldehyde (3 mmol) was added and dissolved in 1 ml of THF. The reaction tube was cooled to 0-5°C with an ice water bath, and 4.5 ml of isopropene magnesium bromide (1 mol/L solution of isopropene magnesium bromide dissolved in THF) was added. The reaction solution was kept at

0-5°C for 3 h. After the reaction was completed, it was quenched with water and extracted with ethyl acetate. The solvent was evaporated to dryness under reduced pressure and the product was purified by column chromatography using ethyl acetate/petroleum ether as eluent to give **2b-2k**.

**(c) Synthesis of compounds 2l-n, 2r** <sup>[5]</sup>

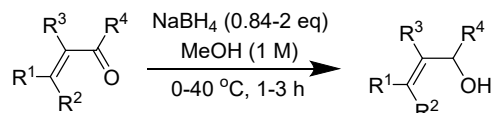

Add  $\alpha,\beta$ -unsaturated ketone (10 mmol) to the reaction flask and dissolve with methanol. Control the temperature at 0-40°C, add sodium borohydride(8.4-20 mmol). The reaction system was kept at 0-40°C for 1-3 h. It was quenched with water and extracted with methylene chloride. The organic phase was dried over anhydrous magnesium sulfate and filtered, and the solvent was distilled off under reduced pressure to obtain the product(**2l-2n, 2r**).

**(d) Synthesis of compounds 2o-2p** <sup>[6]</sup>

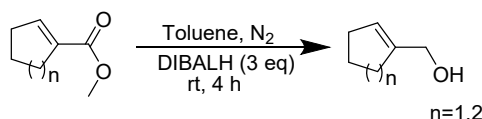

Carboxylate (2 mmol) was added to a reaction tube filled with nitrogen and dissolved in 2 ml of toluene. The reaction tube was cooled to 0-5°C with an ice water bath, and 6 ml of diisobutylaluminum hydride (1 mol/L solution of diisobutylaluminum hydride dissolved in toluene) was added. The reaction tube was incubated at room temperature for 4 h. It was quenched with water and extracted with ethyl acetate. The solvent was evaporated to dryness under reduced pressure and the product was purified by column chromatography using ethyl acetate/petroleum ether as eluent to give **2o-2p**.

**(e) Synthesis of compounds 2s** <sup>[7]</sup>

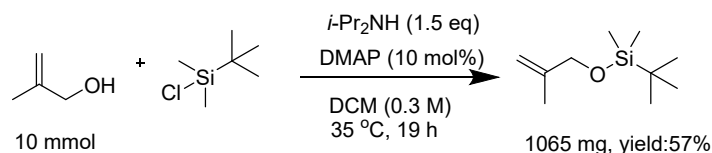

Weigh 2-methylallyl alcohol (721 mg, 10 mmol), diisopropylamine (1518 mg, 15 mmol), DMAP (122 mg, 1 mmol) into the reaction flask, and add 20 mL of dichloromethane to dissolve. Take another reaction flask, weigh in bis(methyl)tert-butylchlorosilane (1808 mg, 12 mmol), and dissolve it with 10 mL of dichloromethane to prepare solution A. Drop solution A into the reaction flask, and keep the reaction at 35 °C for 19 h. After the reaction was completed, it was quenched with water and extracted with ethyl acetate. The organic phase was evaporated to dryness under reduced pressure. The product was purified by column chromatography using petroleum ether as the eluent to obtain **2s** as a colorless liquid (1065 mg, Yield 57%).

### 3. Typical Procedure for Synthesis of 3a:

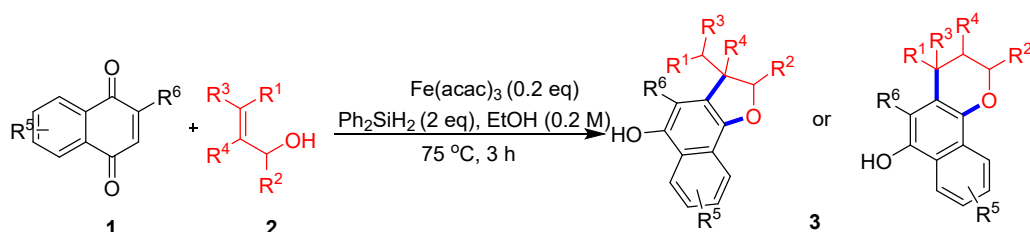

Add Fe(acac)<sub>3</sub> (32 mg, 0.09 mmol) and naphthoquinone **1** (0.3 mmol) to the reaction tube and immediately dissolve it with ethanol (1.5 mL). Then, allyl alcohol **2** (0.9 mmol) and Ph<sub>2</sub>SiH<sub>2</sub> (110 mg, 0.6 mmol) were added via a syringe. Heat the solution to 75 °C. And react at 75 °C for 3 hours. The solution was then diluted with water. Extract with ethyl acetate and transfer to a round bottom flask. Silica gel was added to the flask, and the solvent was evaporated under vacuum. Purified by silica gel column chromatography using ethyl acetate/petroleum ether as eluent to obtain compound **3**.

### 4. Optimization of the Reaction Conditions.

Table 1. Optimization of the Reaction Conditions <sup>a, b</sup>

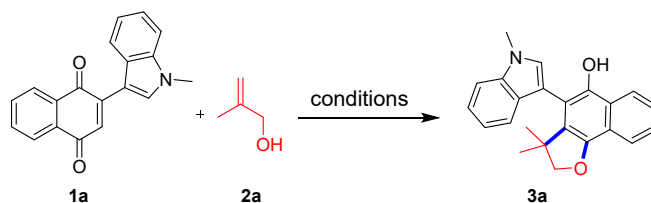

| entry | catalyst                               | reductant                            | solvent     | T (°C) | Yield(%)<br>3a |
|-------|----------------------------------------|--------------------------------------|-------------|--------|----------------|
| 1     | Fe(acac) <sub>3</sub>                  | PhSiH <sub>3</sub>                   | EtOH        | 60     | 42             |
| 2     | Cu(OAc) <sub>2</sub>                   | PhSiH <sub>3</sub>                   | EtOH        | 60     | 0              |
| 3     | CoCl <sub>2</sub> ·6H <sub>2</sub> O   | PhSiH <sub>3</sub>                   | EtOH        | 60     | 0              |
| 4     | Ni(acac) <sub>2</sub>                  | PhSiH <sub>3</sub>                   | EtOH        | 60     | 0              |
| 5     | FeBr <sub>3</sub>                      | PhSiH <sub>3</sub>                   | EtOH        | 60     | trace          |
| 6     | FeCl <sub>3</sub>                      | PhSiH <sub>3</sub>                   | EtOH        | 60     | 23             |
| 7     | Fe(ox) <sub>3</sub> ·6H <sub>2</sub> O | PhSiH <sub>3</sub>                   | EtOH        | 60     | trace          |
| 8     | Fe(acac) <sub>3</sub>                  | HSiCl <sub>3</sub>                   | EtOH        | 60     | trace          |
| 9     | Fe(acac) <sub>3</sub>                  | Et <sub>3</sub> SiH                  | EtOH        | 60     | 0              |
| 10    | Fe(acac) <sub>3</sub>                  | (EtO) <sub>3</sub> SiH               | EtOH        | 60     | 9              |
| 12    | Fe(acac) <sub>3</sub>                  | Ph <sub>2</sub> SiH <sub>2</sub>     | EtOH        | 60     | 62             |
| 13    | Fe(acac) <sub>3</sub>                  | PhSiH(CH <sub>3</sub> ) <sub>2</sub> | EtOH        | 60     | 0              |
| 14    | Fe(acac) <sub>3</sub>                  | PMHS                                 | EtOH        | 60     | 44             |
| 15    | Fe(acac) <sub>3</sub>                  | Ph <sub>3</sub> SiH                  | EtOH        | 60     | 0              |
| 16    | Fe(acac) <sub>3</sub>                  | Et <sub>2</sub> SiH <sub>2</sub>     | EtOH        | 60     | 0              |
| 17    | Fe(acac) <sub>3</sub>                  | NaBH <sub>4</sub>                    | EtOH        | 60     | 0              |
| 18    | Fe(acac) <sub>3</sub>                  | NaBH <sub>3</sub> CN                 | EtOH        | 60     | trace          |
| 19    | Fe(acac) <sub>3</sub>                  | Ph <sub>2</sub> SiH <sub>2</sub>     | cyclohexane | 60     | 33             |

|                    |                       |                                  |         |            |    |
|--------------------|-----------------------|----------------------------------|---------|------------|----|
| 20                 | Fe(acac) <sub>3</sub> | Ph <sub>2</sub> SiH <sub>2</sub> | MeOH    | 60         | 51 |
| 21                 | Fe(acac) <sub>3</sub> | Ph <sub>2</sub> SiH <sub>2</sub> | THF     | 60         | 16 |
| 22                 | Fe(acac) <sub>3</sub> | Ph <sub>2</sub> SiH <sub>2</sub> | Toluene | 60         | 31 |
| 23                 | Fe(acac) <sub>3</sub> | Ph <sub>2</sub> SiH <sub>2</sub> | EtOH    | 75         | 69 |
| 24                 | Fe(acac) <sub>3</sub> | Ph <sub>2</sub> SiH <sub>2</sub> | EtOH    | 100 (seal) | 60 |
| 25 <sup>c</sup>    | Fe(acac) <sub>3</sub> | Ph <sub>2</sub> SiH <sub>2</sub> | EtOH    | 75         | 72 |
| 26 <sup>c, d</sup> | Fe(acac) <sub>3</sub> | Ph <sub>2</sub> SiH <sub>2</sub> | EtOH    | 75         | 45 |
| 27 <sup>c, d</sup> | Fe(acac) <sub>3</sub> | Ph <sub>2</sub> SiH <sub>2</sub> | EtOH    | 75         | 51 |

<sup>a)</sup> Reaction conditions: **1a** (0.2 mmol), **2a** (0.6 mmol), catalyst (30 mol%), reductant (2 equiv), solvent (1 mL), 3h;

<sup>b)</sup> yield refers to isolated product. <sup>c)</sup> Fe(acac)<sub>3</sub> (20 mol %) was used; <sup>d)</sup> Argon atmosphere; <sup>e)</sup> Oxygen atmosphere.

We used 2-(1-methyl-1H-indol-3-yl)naphthalene-1,4-dione (**1a**) and 2-methylallyl alcohol (**2a**) to explore optimal conditions (**Table 1**). Gratifyingly, when the reaction was carried out under Baran's conditions,<sup>8</sup> the product could be obtained in a moderate yield (entry 1). Other metal Lewis acids have almost no catalytic activity (entries 2-6). Regrettably, the reaction was carried out under Boger's conditions<sup>9</sup> and only a trace amount of product was obtained (entry 7). Examination of a series of reducing agents found that, except for diphenylsilane and polymethylhydrogensiloxane, other reducing agents can hardly produce naphthodihydrofuran (entries 8-18). Interestingly, when Ph<sub>2</sub>SiH<sub>2</sub> was used instead of PhSiH<sub>3</sub>, the yield of the reaction could be dramatically increased to 62% (entry 12). When NaBH<sub>4</sub> was used as the reductant, only the raw materials remained in the reaction system (entry 17). We have also examined a series of solvents, although the naphthodihydrofuran can be obtained, but the yield has not been significantly improved (entries 19-22). What's more, when the reaction temperature was increased to 75°C, the yield of the reaction could be increased to 69% (entry 23). When the temperature continued to increase, the yield of the product did not increase (entry 24). When methanol was used as solvent, 2,3-dihydronaphtho[1,2-*b*]furan could be obtained in moderate yield (entry 20). To our surprise, when the catalyst loading was reduced to 20%, the yield could miraculously increase to 72% (entry 25). Finally, whether the reaction was carried out under an oxygen atmosphere or an inert gas atmosphere, the reaction yield could not be improved (entries 26-27). This proved that the reaction was not sensitive to air and moisture.

## 5. Typical Procedure for Synthesis of **5a**.

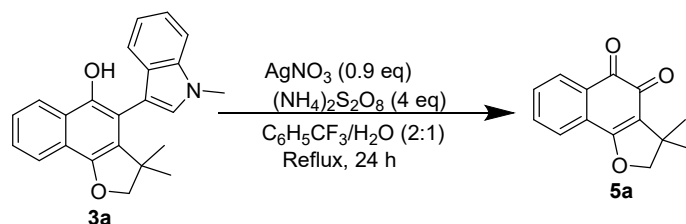

Add AgNO<sub>3</sub> (15 mg, 0.09 mmol), **3a** (0.1 mmol), ammonium persulfate (91 mg, 0.4 mmol) to the reaction tube and add 1 mL benzotrifluoride and 0.6 mL purified water. Heat the solution to 110 °C. And reflux for 24 hours at 110 °C. The solution

was then diluted with water. Extract with ethyl acetate and transfer to a round bottom flask. Silica gel was added to the flask, and the solvent was evaporated under vacuum. Purified by silica gel column chromatography using ethyl acetate/petroleum ether as eluent to obtain compound **5a** (3,3-dimethyl-2,3-dihydronaphtho[1,2-*b*]furan-4,5-dione) as a yellow solid (18 mg, 78% yield).

## 6. Typical Procedure for Synthesis of **6a**.

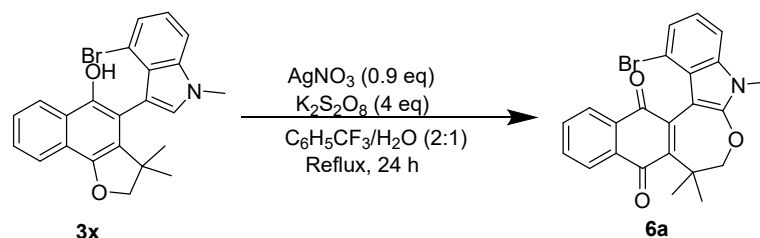

Add  $\text{AgNO}_3$  (15 mg, 0.09 mmol), **3x** (0.1 mmol), potassium persulfate (108 mg, 0.4 mmol) to the reaction tube and add 1 mL of trifluorotoluene and 0.6 mL of purified water. Heat the solution to 110 °C. And reflux for 24 hours at 110 °C. The solution was then diluted with water. Extract with ethyl acetate and transfer to a round bottom flask. Silica gel was added to the flask, and the solvent was evaporated under vacuum. Purify by silica gel column chromatography using ethyl acetate/petroleum ether as eluent to obtain compound **6a** (1-bromo-5,8,8-trimethyl-7,8-dihydro-5*H*-naphtho[2',3':4,5]oxepino[2,3-*b*]indole-9,14-dione) as a red solid (23 mg, 53% yield).

## 7. Characterization of **3**, **4a**, **5a**, **6a**:

### 3,3-dimethyl-4-(1-methyl-1*H*-indol-3-yl)-2,3-dihydronaphtho[1,2-*b*]furan-5-ol (**3a**)

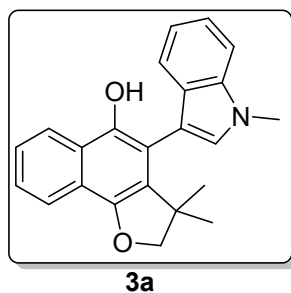

White solid, m.p. 122-123°C, 74 mg, yield: 72%;  $R_f$  = 0.54 (EtOAc/Petroleum ether 1:7).

$^1\text{H NMR}$  (400 MHz,  $\text{CDCl}_3$ ):  $\delta$  8.19 (d,  $J$  = 8.0 Hz, 1H), 7.97 (d,  $J$  = 8.0 Hz, 1H), 7.50 (ddd,  $J$  = 8.2, 6.8, 1.5 Hz, 1H), 7.49-7.41 (m, 2H), 7.36-7.28 (m, 2H), 7.17-7.09 (m, 2H), 5.22 (s, 1H), 4.35-4.28 (dd,  $J$  = 8.0, 8.0 Hz, 2H), 3.93 (s, 3H), 1.27 (s, 3H), 0.94 (s, 3H).

$^{13}\text{C NMR}$  (101 MHz,  $\text{CDCl}_3$ ):  $\delta$  147.5, 144.9, 137.0, 129.6, 128.5, 128.4, 125.8,



124.9, 123.1, 122.9, 122.5, 121.2, 120.8, 120.3, 120.1, 110.4, 109.5, 106.0, 84.9, 44.5, 33.1, 28.0, 26.4.

**HRMS (ESI-TOF) m/z:**  $[M + H]^+$  Calcd for  $C_{23}H_{22}NO_2$  344.1645; found 344.1649.

**3,3-dimethyl-4-phenyl-2-(p-tolyl)-2,3-dihydronaphtho[1,2-b]furan-5-ol (3b)**

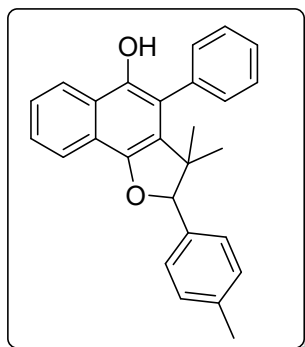

**3b**

White solid, m.p. 111-112°C, 84 mg, yield: 74%;  $R_f = 0.51$  (EtOAc/Petroleum ether 1:15).

**$^1H$  NMR (400 MHz,  $CDCl_3$ ):**  $\delta$  8.21 (d,  $J = 8.9$  Hz, 1H), 8.08 (d,  $J = 7.6$  Hz, 1H), 7.59-7.42 (m, 6H), 7.35 (dd,  $J = 12.5, 7.1$  Hz, 3H), 7.19 (d,  $J = 7.8$  Hz, 2H), 5.37 (s, 1H), 4.81 (s, 1H), 2.38 (s, 3H), 1.07 (s, 3H), 0.68 (s, 3H).

**$^{13}C$  NMR (101 MHz,  $CDCl_3$ ):**  $\delta$  147.1, 142.7, 137.6, 134.4, 133.7, 131.5, 131.2, 129.1, 129.0, 128.8, 128.7, 127.0, 126.7, 125.9, 125.4, 123.4, 122.7, 121.6, 120.6, 119.5, 94.6, 48.0, 26.6, 24.7, 21.2.

**HRMS (ESI-TOF) m/z:**  $[M + H]^+$  Calcd for  $C_{27}H_{25}O_2$  381.1849; found 381.1859.

**2-(4-methoxyphenyl)-3,3-dimethyl-4-phenyl-2,3-dihydronaphtho[1,2-b]furan-5-ol (3c)**

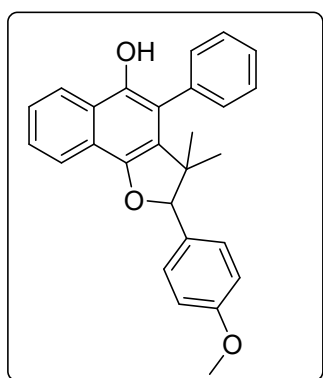

**3c**

White solid, m.p. 108-109°C, 74 mg, yield: 62%;  $R_f = 0.51$  (EtOAc/Petroleum ether 1:15).

**$^1H$  NMR (400 MHz,  $CDCl_3$ ):**  $\delta$  8.21 (d,  $J = 7.4$  Hz, 1H), 8.07 (d,  $J = 9.2$  Hz, 1H),

7.58-7.43 (m, 6H), 7.36 (d,  $J = 8.0$  Hz, 3H), 6.92 (d,  $J = 8.3$  Hz, 2H), 5.35 (s, 1H), 4.82 (s, 1H), 3.83 (s, 3H), 1.05 (s, 3H), 0.68 (s, 3H).

$^{13}\text{C}$  NMR (101 MHz,  $\text{CDCl}_3$ ):  $\delta$  159.4, 147.1, 142.7, 135.2, 133.7, 131.5, 131.2, 129.5, 129.4, 129.1, 129.0, 128.7, 128.5, 128.0, 127.0, 125.9, 125.4, 123.4, 122.7, 121.6, 120.6, 119.5, 113.5, 94.4, 55.3, 48.0, 26.5, 24.7.

HRMS (ESI-TOF)  $m/z$ :  $[\text{M} + \text{H}]^+$  Calcd for  $\text{C}_{27}\text{H}_{25}\text{O}_3$  397.1798; found 397.1797.

## 2-(4-fluorophenyl)-3,3-dimethyl-4-phenyl-2,3-dihydronaphtho[1,2-

### b]furan-5-ol (3d)

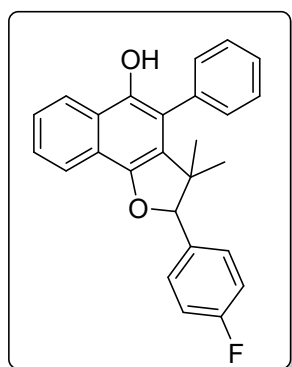

3d

White solid, m.p. 105-106°C, 74 mg, yield: 64%;  $R_f = 0.51$  (EtOAc/Petroleum ether 1:15).

$^1\text{H}$  NMR (400 MHz,  $\text{CDCl}_3$ ):  $\delta$  8.22 (d,  $J = 8.2$  Hz, 1H), 8.07 (d,  $J = 7.8$  Hz, 1H), 7.59-7.46 (m, 5H), 7.48-7.38 (m, 3H), 7.36 (d,  $J = 7.0$  Hz, 1H), 7.16-7.01 (m, 2H), 5.37 (s, 1H), 4.83 (s, 1H), 1.07 (s, 3H), 0.66 (s, 3H).

$^{13}\text{C}$  NMR (101 MHz,  $\text{CDCl}_3$ ):  $\delta$  163.8-161.3 ( $J=252.5$  Hz), 146.9, 142.9, 134.6, 133.5, 133.3, 131.5, 131.2, 129.1, 129.1, 128.8, 128.4, 128.3, 126.7, 126.0, 125.5, 123.5, 122.7, 121.5, 120.6, 119.3, 115.1-114.9 ( $J=20.2$  Hz), 93.9, 77.3, 77.0, 76.7, 48.0, 26.5, 24.7.

$^{19}\text{F}$  NMR (376 MHz,  $\text{CDCl}_3$ )  $\delta$  -114.46

HRMS (ESI-TOF)  $m/z$ :  $[\text{M} + \text{H}]^+$  Calcd for  $\text{C}_{26}\text{H}_{22}\text{FO}_2$  385.1598; found 385.1591.

## 2-(4-chlorophenyl)-3,3-dimethyl-4-phenyl-2,3-dihydronaphtho[1,2-

### b]furan-5-ol (3e)

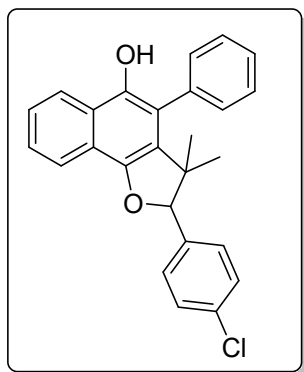

**3e**

White solid, m.p. 113-114°C, 70 mg, yield: 58%;  $R_f = 0.51$  (EtOAc/Petroleum ether 1:15).

**$^1\text{H NMR}$  (400 MHz,  $\text{CDCl}_3$ ):**  $\delta$  8.21 (d,  $J = 7.3$  Hz, 1H), 8.05 (d,  $J = 8.6$  Hz, 1H), 7.59-7.40 (m, 6H), 7.41-7.30 (m, 5H), 5.36 (s, 1H), 4.82 (s, 1H), 1.07 (s, 3H), 0.65 (s, 3H).

**$^{13}\text{C NMR}$  (101 MHz,  $\text{CDCl}_3$ ):**  $\delta$  146.8, 142.9, 136.1, 133.7, 133.5, 131.5, 131.2, 129.1, 129.1, 128.8, 128.3, 128.1, 126.6, 126.0, 125.5, 123.5, 122.7, 121.4, 120.6, 119.3, 93.8, 48.1, 26.6, 24.7.

**HRMS (ESI-TOF)  $m/z$ :**  $[\text{M} + \text{H}]^+$  Calcd for  $\text{C}_{26}\text{H}_{22}\text{ClO}_2$  401.1303; found 401.1312.

**2-(4-bromophenyl)-3,3-dimethyl-4-phenyl-2,3-dihydro-1H-naphtho[1,2-b]furan-5-ol (3f)**

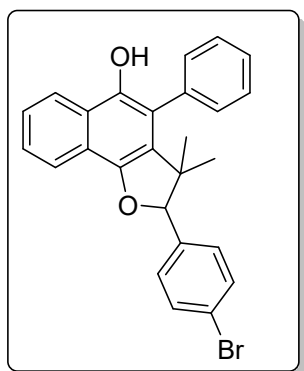

**3f**

White solid, m.p. 101-102°C, 95 mg, yield: 71%;  $R_f = 0.51$  (EtOAc/Petroleum ether 1:15).

**$^1\text{H NMR}$  (400 MHz,  $\text{CDCl}_3$ ):**  $\delta$  8.21 (d,  $J = 7.7$  Hz, 1H), 8.05 (d,  $J = 8.5$  Hz, 1H), 7.55-7.48 (m, 7H), 7.44 (d,  $J = 8.0$  Hz, 1H), 7.36-7.33 (m, 3H), 5.34 (s, 1H), 4.82 (s, 1H), 1.07 (s, 3H), 0.65 (s, 3H).

**$^{13}\text{C NMR}$  (101 MHz,  $\text{CDCl}_3$ ):**  $\delta$  146.8, 142.9, 136.7, 134.6, 133.5, 131.5, 131.2, 131.2, 129.2, 129.1, 128.8, 128.4, 127.8, 126.6, 126.0, 125.5, 123.5, 122.7, 121.8, 121.4, 120.6, 119.3, 93.8, 48.1, 26.6, 24.7.

**HRMS (ESI-TOF)  $m/z$ :**  $[\text{M} + \text{H}]^+$  Calcd for  $\text{C}_{26}\text{H}_{22}\text{BrO}_2$  445.0798; found 445.0804.

**2-(3-chlorophenyl)-3,3-dimethyl-4-phenyl-2,3-dihydro-1H-naphtho[1,2-b]furan-5-ol**

### *b*]furan-5-ol (3g)

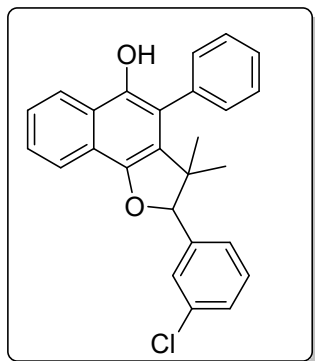

**3g**

White solid, m.p. 136-137°C, 76 mg, yield: 63%;  $R_f = 0.51$  (EtOAc/Petroleum ether 1:15).

**$^1\text{H NMR}$  (400 MHz,  $\text{CDCl}_3$ ):**  $\delta$  8.22 (d,  $J = 7.5$  Hz, 1H), 8.07 (d,  $J = 9.3$  Hz, 1H), 7.58-7.43 (m, 7H), 7.36 (d,  $J = 7.1$  Hz, 1H), 7.33-7.30 (m, 3H), 5.36 (s, 1H), 4.83 (s, 1H), 1.09 (s, 3H), 0.68 (s, 3H).

**$^{13}\text{C NMR}$  (101 MHz,  $\text{CDCl}_3$ ):**  $\delta$  146.7, 143.0, 139.8, 134.2, 133.4, 131.5, 131.2, 129.4, 129.2, 129.1, 128.8, 128.1, 126.8, 126.6, 126.0, 125.5, 124.9, 123.5, 122.7, 121.5, 120.6, 119.2, 93.7, 48.2, 26.6, 24.8.

**HRMS (ESI-TOF)  $m/z$ :**  $[\text{M} + \text{H}]^+$  Calcd for  $\text{C}_{26}\text{H}_{22}\text{ClO}_2$  401.1303; found 401.1304.

### 3',3'-dimethyl-4'-(1-methyl-1H-indol-3-yl)-3'H-spiro[cyclopentane-

### 1,2'-naphtho[1,2-*b*]furan]-5'-ol (3h)

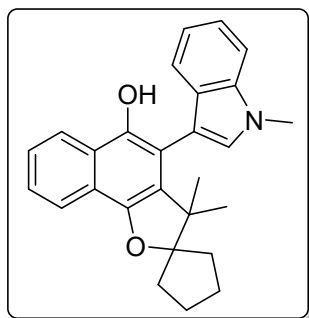

**3h**

White solid, m.p. 183-184°C, 84 mg, yield: 70%;  $R_f = 0.62$  (EtOAc/Petroleum ether 1:7).

**$^1\text{H NMR}$  (400 MHz,  $\text{CDCl}_3$ ):**  $\delta$  8.19 (d,  $J = 8.1$  Hz, 1H), 8.00 (d,  $J = 8.0$  Hz, 1H), 7.46 (m, 3H), 7.34 (t,  $J = 7.5$  Hz, 2H), 7.16 (d,  $J = 6.9$  Hz, 2H), 5.20 (s, 1H), 3.96 (s, 3H), 2.02-1.94 (m, 3H), 1.90-1.85 (m, 1H), 1.66-1.63 (m, 2H), 1.45-1.29 (m, 2H), 1.12 (s, 3H), 0.82 (s, 3H).

**$^{13}\text{C NMR}$  (101 MHz,  $\text{CDCl}_3$ ):**  $\delta$  146.0, 144.5, 137.0, 134.3, 130.0, 129.6, 128.7, 125.4, 124.7, 122.7, 122.4, 121.5, 121.0, 120.3, 120.1, 110.6, 109.5, 106.4, 103.8, 46.5, 33.2, 32.6, 32.1, 31.5, 25.2, 23.3, 23.2.

HRMS (ESI-TOF)  $m/z$ :  $[M + H]^+$  Calcd for  $C_{27}H_{28}NO_2$  398.2115; found 398.2111.

**3',3'-dimethyl-4'-(1-methyl-1H-indol-3-yl)-3'H-spiro[cyclohexane-1,2'-naphtho[1,2-b]furan]-5'-ol (3i)**

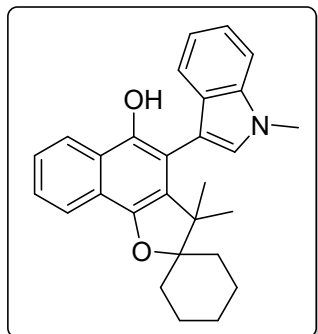

**3i**

White solid, m.p. 139-140°C, 72 mg, yield: 58%;  $R_f$  = 0.62 (EtOAc/Petroleum ether 1:15).

**$^1H$  NMR (400 MHz,  $CDCl_3$ ):**  $\delta$  8.11 (d,  $J$  = 7.8 Hz, 1H), 7.82 (ddt,  $J$  = 7.9, 2.3, 0.9 Hz, 2H), 7.74 (s, 1H), 7.61 (ddd,  $J$  = 7.9, 7.3, 1.3 Hz, 1H), 7.48 (td,  $J$  = 7.5, 1.2 Hz, 1H), 7.39-7.35 (m, 2H), 7.23-7.18 (m, 1H), 3.84 (s, 3H), 2.20-2.14 (m, 2H), 1.90-1.80 (m, 1H), 1.78-1.70 (m, 4H), 1.51-1.50 (m, 1H), 1.48 (s, 3H), 1.45 (s, 3H), 1.41-1.37 (m, 1H), 1.30-1.22 (m, 1H).

**$^{13}C$  NMR (101 MHz,  $CDCl_3$ ):**  $\delta$  184.7, 142.3, 141.5, 136.9, 132.5, 132.5, 132.1, 131.2, 128.8, 127.0, 126.6, 126.3, 121.8, 120.1, 119.5, 109.7, 108.0, 99.6, 85.7, 85.0, 34.3, 34.1, 33.0, 25.9, 25.8, 25.5, 22.8, 22.6.

HRMS (ESI-TOF)  $m/z$ :  $[M + H]^+$  Calcd for  $C_{28}H_{30}NO_2$  412.2271; found 412.2275.

**3',3'-dimethyl-4'-(1-methyl-1H-indol-3-yl)-3'H-spiro[cycloheptane-1,2'-naphtho[1,2-b]furan]-5'-ol (3j)**

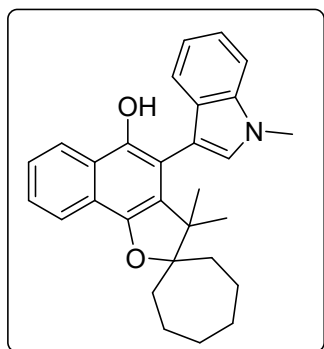

**3j**

White solid, m.p. 106-107°C, 66 mg, yield: 52%;  $R_f$  = 0.62 (EtOAc/Petroleum ether 1:7).

**$^1H$  NMR (400 MHz,  $CDCl_3$ ):**  $\delta$  8.19 (d,  $J$  = 8.2 Hz, 1H), 8.05 (d,  $J$  = 8.2 Hz, 1H), 7.53-7.40 (m, 3H), 7.34 (d,  $J$  = 7.8 Hz, 2H), 7.19-7.09 (m, 2H), 5.20 (s, 1H), 3.95 (s,

3H), 2.17 (dd,  $J = 14.7, 7.9$  Hz, 1H), 2.06 (dd,  $J = 14.7, 8.1$  Hz, 1H), 1.88 (q,  $J = 11.8, 11.2$  Hz, 2H), 1.71 (td,  $J = 17.7, 14.8, 7.9$  Hz, 4H), 1.53-1.44 (m, 2H), 1.40-1.29 (m, 2H), 1.07 (s, 3H), 0.78 (s, 3H).

**$^{13}\text{C}$  NMR (101 MHz,  $\text{CDCl}_3$ ):**  $\delta$  145.9, 144.4, 137.0, 134.3, 129.9, 129.5, 128.7, 128.0, 125.4, 124.6, 122.7, 122.4, 121.4, 120.3, 120.1, 111.0, 109.4, 106.4, 94.9, 50.7, 33.5, 33.3, 33.2, 29.1, 29.0, 24.5, 22.7, 22.4, 22.2.

**HRMS (ESI-TOF)  $m/z$ :**  $[\text{M} + \text{H}]^+$  Calcd for  $\text{C}_{29}\text{H}_{32}\text{NO}_2$  426.2428; found 426.2427.

### 3',3'-dimethyl-4'-(1-methyl-1H-indol-3-yl)-3'H-spiro[cyclooctane-

### 1,2'-naphtho[1,2-*b*]furan]-5'-ol (3k)

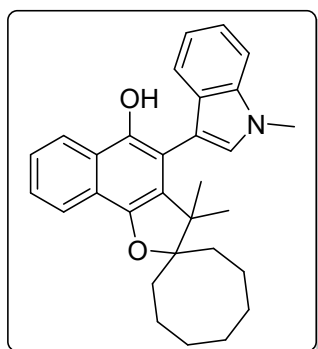

**3k**

White solid, m.p. 100-102°C, 81 mg, yield: 61%;  $R_f = 0.61$  (EtOAc/Petroleum ether 1:7).

**$^1\text{H}$  NMR (400 MHz,  $\text{CDCl}_3$ ):**  $\delta$  8.30-8.27 (m, 1H), 8.21-8.19 (m, 1H), 7.65-7.63 (m, 1H), 7.53-7.47 (m, 2H), 7.46-7.43 (m, 1H), 7.38-7.33 (ddd,  $J = 8.2, 6.9, 1.1$  Hz, 1H), 7.27-7.26 (d,  $J = 4$  Hz, 1H), 7.22 (ddd,  $J = 8.0, 7.0, 1.1$  Hz, 1H), 7.16 (s, 1H), 5.85 (s, 1H), 3.90 (s, 3H), 2.19-2.07 (m, 2H), 1.97-1.86 (m, 3H), 1.77-1.63 (m, 4H), 1.60-1.48 (m, 3H), 1.36 (s, 6H), 1.04-0.97 (m, 1H), 0.93-0.84 (m, 1H).

**$^{13}\text{C}$  NMR (101 MHz,  $\text{CDCl}_3$ ):**  $\delta$  144.9, 143.1, 137.4, 130.7, 127.9, 126.8, 125.6, 125.4, 125.0, 123.1, 122.7, 122.4, 122.1, 120.3, 119.9, 113.4, 110.7, 109.8, 88.1, 78.7, 34.7, 33.0, 31.4, 28.2, 26.9, 25.3, 24.8, 22.4, 22.2, 18.8.

**HRMS (ESI-TOF)  $m/z$ :**  $[\text{M} + \text{H}]^+$  Calcd for  $\text{C}_{30}\text{H}_{34}\text{NO}_2$  440.2584; found 440.2586.

### 6-(1-methyl-1H-indol-3-yl)-6b,8,9,10,11,11a-hexahydro-7H-

### cyclohepta[*b*]naphtho[2,1-*d*]furan-5-ol (3l)

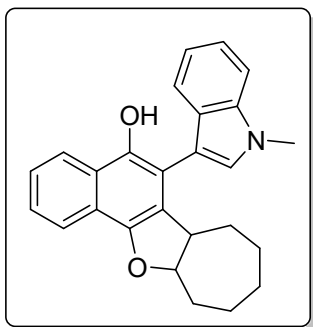

**3l**

White solid, m.p. 176-177°C, 54 mg, yield: 47%; d.r. = 6:5:1,  $R_f$  = 0.40 (EtOAc/Petroleum ether 1:7).

**$^1\text{H}$  NMR (400 MHz,  $\text{CDCl}_3$ ):**  $\delta$  8.21 (d,  $J$  = 8.1 Hz, 1H), 7.96 (d,  $J$  = 7.7 Hz, 1H), 7.45 (d,  $J$  = 8.2 Hz, 3H), 7.34 (t,  $J$  = 7.6 Hz, 2H), 7.26-7.03 (m, 2H), 5.34 (s, 1H), 4.59 (dt,  $J$  = 12.3, 5.1 Hz, 1H), 3.91 (s, 3H), 3.73-3.52 (m, 1H), 2.51 (dt,  $J$  = 16.6, 5.5 Hz, 1H), 1.96 (tt,  $J$  = 12.1, 7.3 Hz, 1H), 1.86-1.70 (m, 1H), 1.68-1.05 (m, 7H).

**$^{13}\text{C}$  NMR (101 MHz,  $\text{CDCl}_3$ ):**  $\delta$  148.0, 143.5, 137.5, 137.0, 134.3, 130.3, 128.6, 128.1, 127.9, 127.8, 125.6, 124.9, 124.4, 124.3, 123.3, 123.1, 122.9, 122.8, 122.6, 122.4, 121.3, 120.3, 120.1, 120.0, 119.9, 111.1, 109.7, 109.6, 107.6, 89.8, 89.8, 86.6, 49.1, 48.9, 33.1, 32.9, 31.7, 28.4, 28.3, 27.5, 27.3, 25.9, 25.8, 24.9, 24.7, 23.6.

**HRMS (ESI-TOF) m/z:**  $[\text{M} + \text{H}]^+$  Calcd for  $\text{C}_{26}\text{H}_{26}\text{NO}_2$  384.1958; found 384.1955.

**6b-methyl-6-(1-methyl-1H-indol-3-yl)-6b,8,9,10,11,11a-hexahydro-**

**7H-cyclohepta[b]naphtho[2,1-d]furan-5-ol (3m)**

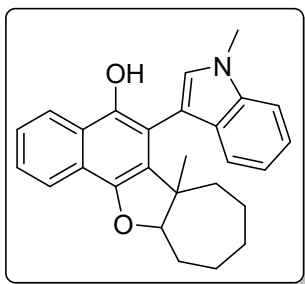

**3m**

White solid, m.p. 187-188°C, 63 mg, yield: 53%; d.r. = 1:3:2,  $R_f$  = 0.40 (EtOAc/Petroleum ether 1:7).

**$^1\text{H}$  NMR (400 MHz,  $\text{CDCl}_3$ ):**  $\delta$  8.2 (d,  $J$  = 7.9 Hz, 1H), 8.0 (d,  $J$  = 8.8 Hz, 1H), 7.52-7.42 (m, 3H), 7.37-7.29 (m, 2H), 7.16-7.09 (m, 2H), 5.2 (s, 1H), 4.6 (t,  $J$  = 17.1 Hz, 1H), 3.9 (s, 3H), 2.39-2.30 (m, 1H), 2.13-2.01 (m, 1H), 1.92-1.85 (m, 1H), 1.66-1.55 (m, 3H), 1.49-1.37 (m, 2H), 1.34-1.26 (m, 3H), 1.01-0.86 (m, 2H).

**$^{13}\text{C}$  NMR (101 MHz,  $\text{CDCl}_3$ ):**  $\delta$  146.9, 145.0, 144.9, 137.1, 137.0, 131.8, 131.6, 130.0, 129.8, 129.2, 128.6, 128.3, 125.6, 125.6, 124.9, 124.8, 122.8, 122.5, 122.4, 122.4, 121.5, 121.4, 121.3, 120.7, 120.3, 120.3, 120.1, 120.1, 120.0, 110.5, 110.4, 109.5, 109.4, 106.7, 92.8, 90.2, 89.8, 50.8, 50.4, 38.5, 38.0, 37.2, 35.4, 33.2, 31.2,

30.5, 30.1, 27.2, 27.0, 25.5, 25.2, 25.1, 25.1, 23.6, 23.5, 23.2, 20.1, 19.4.

**HRMS (ESI-TOF) m/z:**  $[M + H]^+$  Calcd for  $C_{27}H_{28}NO_2$  398.2115; found 398.2120.

### 3-ethyl-2,3-dimethyl-4-(1-methyl-1H-indol-3-yl)-2,3-

### dihydronaphtho[1,2-*b*]furan-5-ol (3n)

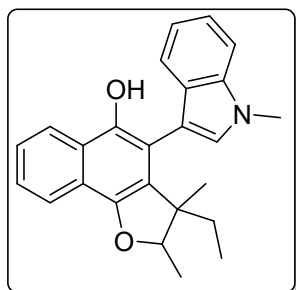

**3n**

White solid, m.p. 216-217°C, 79 mg, yield: 71%; d.r. = 1:2,  $R_f$  = 0.40 (EtOAc/Petroleum ether 1:15).

**$^1H$  NMR (400 MHz,  $CDCl_3$ ):**  $\delta$  8.31 (d,  $J$  = 12.4 Hz, 1H), 8.13 (d,  $J$  = 10.4 Hz, 1H), 7.56-7.40 (m, 3H), 7.36-7.26 (m, 2H), 7.18-7.06 (m, 2H), 5.04 (d,  $J$  = 4.4 Hz, 1H), 4.40 (dddd,  $J$  = 11.5, 5.4, 3.5, 1.8 Hz, 1H), 3.93 (s, 3H), 1.89-1.77 (m, 1H), 1.62-1.55 (m, 1H), 1.53-1.50 (m, 3H), 1.47-1.19 (d,  $J$  = 2.9 Hz, 3H), 1.10-0.79 (d,  $J$  = 3.6 Hz, 3H).

**$^{13}C$  NMR (101 MHz,  $CDCl_3$ ):**  $\delta$  144.8, 144.5, 142.8, 136.9, 130.8, 130.3, 129.1, 128.6, 126.0, 125.9, 125.8, 125.3, 125.0, 124.8, 122.8, 122.5, 122.4, 122.2, 122.0, 122.0, 120.8, 120.5, 120.3, 120.1, 112.4, 112.4, 109.5, 109.4, 68.2, 67.9, 49.6, 49.1, 33.5, 33.3, 33.1, 32.2, 31.2, 31.2, 29.6, 21.8, 21.7.

**HRMS (ESI-TOF) m/z:**  $[M + H]^+$  Calcd for  $C_{25}H_{26}NO_2$  372.1958; found 372.1963.

### 4'-(1-methyl-1H-indol-3-yl)-2'H-spiro[cyclopentane-1,3'-naphtho[1,2-

### *b*]furan]-5'-ol (3o)

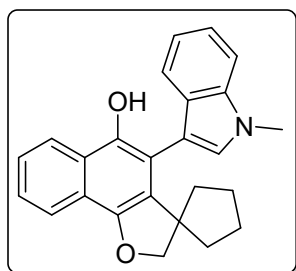

**3o**

White solid, m.p. 147-148°C, 64 mg, yield: 58%;  $R_f$  = 0.55 (EtOAc/Petroleum ether 1:7).

**$^1H$  NMR (400 MHz,  $CDCl_3$ ):**  $\delta$  8.18 (d,  $J$  = 8.2 Hz, 1H), 7.96 (d,  $J$  = 7.4 Hz, 1H), 7.51-7.42 (m, 3H), 7.34-7.30 (m, 2H), 7.16-7.09 (m, 2H), 5.21 (s, 1H), 4.38 (d,  $J$  = 8.3 Hz, 1H), 4.28 (d,  $J$  = 8.2 Hz, 1H), 3.92 (s, 3H), 2.00-1.93 (m, 1H), 1.88-1.79 (m,



1H), 1.59-1.55 (m, 1H), 1.47-1.35 (m, 2H), 1.33-1.23 (m, 2H), 1.01- 0.94 (m, 1H).  
<sup>13</sup>C NMR (101 MHz, CDCl<sub>3</sub>): δ 148.2, 145.1, 137.0, 134.6, 129.6, 128.3, 126.7, 125.8, 124.9, 122.8, 122.5, 121.1, 120.6, 120.2, 120.1, 110.2, 109.5, 106.0, 85.6, 54.7, 39.9, 37.1, 33.1, 25.5, 25.4.

HRMS (ESI-TOF) m/z: [M + H]<sup>+</sup> Calcd for C<sub>25</sub>H<sub>24</sub>NO<sub>2</sub> 370.1802; found 370.1807.

**4'-(1-methyl-1H-indol-3-yl)-2'H-spiro[cyclohexane-1,3'-naphtho[1,2-b]furan]-5'-ol (3p)**

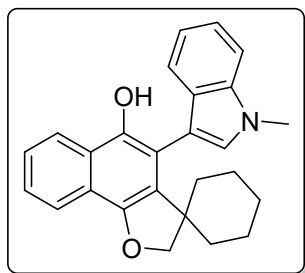

**3p**

White solid, m.p. 198-199°C, 78 mg, yield: 68%; R<sub>f</sub> = 0.54 (EtOAc/Petroleum ether 1:15).

<sup>1</sup>H NMR (400 MHz, CDCl<sub>3</sub>): δ 8.17 (d, *J* = 7.7 Hz, 1H), 7.97 (d, *J* = 7.0 Hz, 1H), 7.51-7.42 (m, 3H), 7.34-7.29 (m, 2H), 7.15-7.11 (m, 2H), 5.17 (s, 1H), 4.59 (d, *J* = 8.6 Hz, 1H), 4.41 (d, *J* = 8.6 Hz, 1H), 3.95 (s, 3H), 1.82-1.68 (m, 2H), 1.57-1.51 (m, 3H), 1.38-1.28 (m, 2H), 1.26-1.08 (m, 2H), 0.77-0.68 (m, 1H).

<sup>13</sup>C NMR (101 MHz, CDCl<sub>3</sub>): δ 147.6, 144.9, 137.1, 134.6, 129.7, 128.6, 125.7, 124.9, 123.1, 122.8, 122.5, 121.2, 120.8, 120.3, 120.2, 110.5, 109.5, 106.1, 80.3, 49.4, 35.9, 34.4, 33.2, 25.2, 23.3, 23.1.

HRMS (ESI-TOF) m/z: [M + H]<sup>+</sup> Calcd for C<sub>26</sub>H<sub>26</sub>NO<sub>2</sub> 384.1958; found 384.1966.

**4,4-dimethyl-5-(1-methyl-1H-indol-3-yl)-3,4-dihydro-2H-benzo[*h*]chromen-6-ol (3q)**

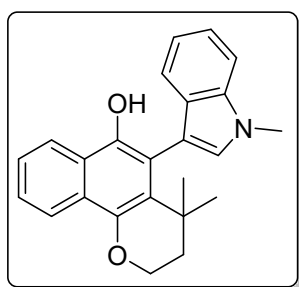

**3q**

White solid, m.p. 239-240°C, 71 mg, yield: 66%; R<sub>f</sub> = 0.40 (EtOAc/Petroleum ether 1:15).

<sup>1</sup>H NMR (400 MHz, CDCl<sub>3</sub>): δ 8.25 (d, *J* = 7.2 Hz, 1H), 8.13 (d, *J* = 7.6 Hz, 1H), 7.55-7.41 (m, 3H), 7.36-7.27 (m, 2H), 7.18-7.09 (m, 2H), 5.07 (s, 1H), 4.42-4.31 (m,

2H), 3.93 (s, 3H), 1.96 (td,  $J = 8.8, 4.6$  Hz, 1H), 1.77 (ddd,  $J = 13.7, 5.0, 3.0$  Hz, 1H), 1.39 (s, 3H), 0.91 (s, 3H).

$^{13}\text{C}$  NMR (101 MHz,  $\text{CDCl}_3$ ):  $\delta$  144.5, 142.8, 136.9, 130.8, 130.3, 129.1, 128.6, 126.0, 125.9, 125.8, 125.8, 125.3, 124.8, 122.8, 122.5, 122.4, 122.2, 122.0, 122.0, 120.8, 120.5, 120.3, 120.1, 112.4, 109.5, 109.4, 109.1, 68.2, 67.9, 49.6, 49.1, 33.5, 33.3, 33.1, 32.2, 31.2, 31.2, 29.6, 21.8, 21.7.

HRMS (ESI-TOF)  $m/z$ :  $[\text{M} + \text{H}]^+$  Calcd for  $\text{C}_{24}\text{H}_{24}\text{NO}_2$  358.1802; found 358.1799.

### 2,4,4-trimethyl-5-(1-methyl-1H-indol-3-yl)-3,4-dihydro-2H-

### benzo[*h*]chromen-6-ol (3r)

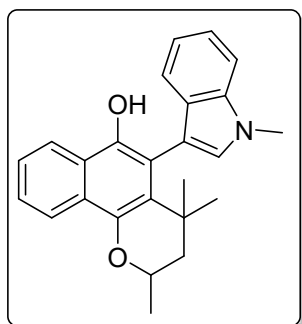

3r

White solid, m.p. 213-214°C, 59 mg, yield: 53%, d.r. = 2:1,  $R_f = 0.66$  (EtOAc/Petroleum ether 1:7).

$^1\text{H}$  NMR (400 MHz,  $\text{CDCl}_3$ ):  $\delta$  8.30 (d,  $J = 8.8$  Hz, 1H), 8.12 (d,  $J = 7.8$  Hz, 1H), 7.54-7.40 (m, 3H), 7.31 (m, 2H), 7.17-7.06 (m, 2H), 5.04 (s, 1H), 4.34 (ddd,  $J = 35.7, 11.6, 6.1$  Hz, 1H), 3.93 (s, 3H), 1.91-1.74 (m, 1H), 1.59 (dd,  $J = 13.3, 6.3$  Hz, 1H), 1.51 (d,  $J = 6.1$  Hz, 3H), 1.46 (s, 3H), 0.79 (s, 3H).

$^{13}\text{C}$  NMR (101 MHz,  $\text{CDCl}_3$ ):  $\delta$  172.62, 141.77, 140.09, 137.80, 135.08, 133.04, 130.10, 129.21, 128.91, 128.75, 127.81, 127.03, 126.91, 79.04, 39.53, 25.68.

HRMS (ESI-TOF)  $m/z$ :  $[\text{M} + \text{H}]^+$  Calcd for  $\text{C}_{25}\text{H}_{26}\text{NO}_2$  372.1958; found 372.1964.

### 4-(1H-indol-3-yl)-3,3-dimethyl-2,3-dihydronaphtho[1,2-*b*]furan-5-ol

### (3s)

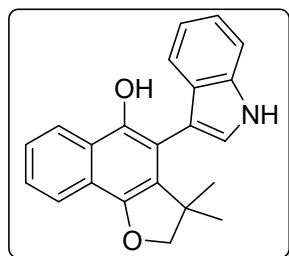

3s

White solid, m.p. 142-143°C, 56 mg, yield: 57%;  $R_f = 0.24$  (EtOAc/Petroleum ether 1:7).

**<sup>1</sup>H NMR (400 MHz, DMSO-*d*<sub>6</sub>):** δ 11.27 (s, 1H), 8.09 (d, *J* = 7.3 Hz, 1H), 7.82 (d, *J* = 8.8 Hz, 1H), 7.70 (s, 1H), 7.51-7.36 (m, 3H), 7.32 (d, *J* = 2.4 Hz, 1H), 7.09 (dd, *J* = 14.4, 7.5 Hz, 2H), 6.93 (t, *J* = 7.5 Hz, 1H), 4.23 (d, *J* = 8.3 Hz, 1H), 4.16 (d, *J* = 8.3 Hz, 1H), 1.15 (s, 3H), 0.75 (s, 3H).

**<sup>13</sup>C NMR (101 MHz, DMSO-*d*<sub>6</sub>):** δ 146.7, 146.0, 136.4, 129.5, 129.0, 126.3, 125.8, 125.0, 124.6, 123.4, 121.4, 121.3, 120.3, 119.7, 119.1, 113.6, 111.9, 108.1, 84.4, 44.5, 28.1, 26.3.

**HRMS (ESI-TOF) *m/z*:** [M + H]<sup>+</sup> Calcd for C<sub>22</sub>H<sub>20</sub>NO<sub>2</sub> 330.1489; found 330.1494.

**(3-(5-hydroxy-3,3-dimethyl-2,3-dihydronaphtho[1,2-*b*]furan-4-yl)-1H-indol-1-yl)(phenyl)methanone (3t)**

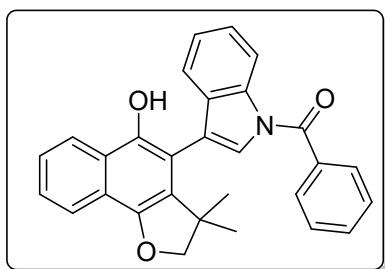

**3t**

White solid, m.p. 130-131°C, 113 mg, yield: 87%; R<sub>f</sub> = 0.60 (EtOAc/Petroleum ether 1:7).

**<sup>1</sup>H NMR (400 MHz, CDCl<sub>3</sub>):** δ 8.52 (d, *J* = 8.3 Hz, 1H), 8.20 (d, *J* = 8.2 Hz, 1H), 7.99 (d, *J* = 8.1 Hz, 1H), 7.83-7.73 (m, 2H), 7.73-7.58 (m, 2H), 7.58-7.43 (m, 5H), 7.36 (d, *J* = 4.3 Hz, 2H), 5.09 (s, 1H), 4.37 (d, *J* = 8.3 Hz, 1H), 4.33 (d, *J* = 8.3 Hz, 1H), 1.32 (s, 3H), 1.04 (s, 3H).

**<sup>13</sup>C NMR (101 MHz, CDCl<sub>3</sub>):** δ 168.6, 148.0, 144.5, 136.2, 134.6, 134.4, 134.1, 132.3, 130.9, 130.3, 130.2, 129.2, 128.8, 128.1, 127.8, 126.3, 126.1, 125.4, 124.7, 122.8, 121.3, 120.4, 116.6, 114.3, 108.3, 84.9, 44.4, 28.0, 26.5.

**HRMS (ESI-TOF) *m/z*:** [M + H]<sup>+</sup> Calcd for C<sub>29</sub>H<sub>24</sub>NO<sub>3</sub> 434.1751; found 434.1759.

**4-(1-allyl-1H-indol-3-yl)-3,3-dimethyl-2,3-dihydronaphtho[1,2-*b*]furan-5-ol (3u)**

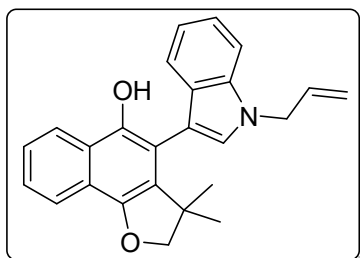

**3u**

White solid, m.p. 125-126°C, 56 mg, yield: 50%; R<sub>f</sub> = 0.32 (EtOAc/Petroleum ether 1:7).

**<sup>1</sup>H NMR (400 MHz, CDCl<sub>3</sub>):** δ 8.21 (d, *J* = 8.2 Hz, 1H), 7.99 (d, *J* = 8.1 Hz, 1H), 7.58-7.41 (m, 3H), 7.39-7.28 (m, 2H), 7.21 (s, 1H), 7.15 (t, *J* = 7.5 Hz, 1H), 6.10 (ddt, *J* = 16.3, 10.4, 5.2 Hz, 1H), 5.30 (d, *J* = 10.2 Hz, 1H), 5.25 (s, 1H), 5.19 (d, *J* = 17.1 Hz, 1H), 4.96-4.80 (m, 2H), 4.36 (d, *J* = 8.2 Hz, 1H), 4.31 (d, *J* = 8.2 Hz, 1H), 1.29 (s, 3H), 0.96 (s, 3H).

**<sup>13</sup>C NMR (101 MHz, CDCl<sub>3</sub>):** δ 147.5, 144.8, 136.4, 133.1, 128.7, 128.6, 128.3, 125.8, 125.0, 123.1, 122.8, 122.6, 121.2, 120.8, 120.3, 120.3, 117.6, 110.4, 109.9, 106.5, 84.9, 48.9, 44.5, 28.0, 26.4.

**HRMS (ESI-TOF) m/z:** [M + H]<sup>+</sup> Calcd for C<sub>25</sub>H<sub>24</sub>NO<sub>2</sub> 370.1802; found 370.1796.

### 4-(1,2-dimethyl-1H-indol-3-yl)-3,3-dimethyl-2,3-dihydronaphtho[1,2-b]furan-5-ol (3v)

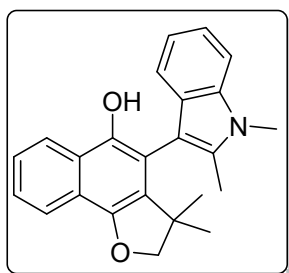

**3v**

White solid, m.p. 212-213°C, 54 mg, yield: 50%; R<sub>f</sub> = 0.32 (EtOAc/Petroleum ether 1:7).

**<sup>1</sup>H NMR (400 MHz, CDCl<sub>3</sub>):** δ 8.22 (d, *J* = 7.9 Hz, 1H), 8.00 (d, *J* = 7.5 Hz, 1H), 7.56-7.42 (m, 2H), 7.15 (dd, *J* = 7.5, 1.7 Hz, 1H), 7.02 (dd, *J* = 9.9, 7.9 Hz, 3H), 5.25 (s, 1H), 4.36 (d, *J* = 8.2 Hz, 1H), 4.32 (d, *J* = 8.2 Hz, 1H), 4.20 (s, 3H), 2.89 (s, 3H), 1.31 (s, 3H), 0.98 (s, 3H).

**<sup>13</sup>C NMR (101 MHz, CDCl<sub>3</sub>):** δ 147.5, 144.9, 135.8, 131.2, 129.5, 128.4, 125.7, 125.1, 124.9, 123.1, 122.9, 121.4, 121.2, 120.8, 120.4, 118.4, 110.5, 105.8, 84.9, 44.5, 37.0, 28.1, 26.4, 19.7.

**HRMS (ESI-TOF) m/z:** [M + H]<sup>+</sup> Calcd for C<sub>24</sub>H<sub>24</sub>NO<sub>2</sub> 358.1802; found 358.1799.

### 3,3-dimethyl-4-(1-methyl-2-phenyl-1H-indol-3-yl)-2,3-dihydronaphtho[1,2-b]furan-5-ol (3w)

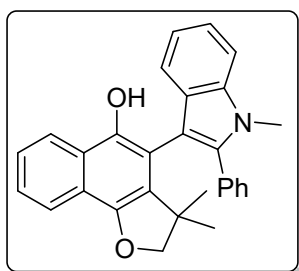

**3w**

White solid, m.p. 204-205°C, 78 mg, yield: 62%; R<sub>f</sub> = 0.40 (EtOAc/Petroleum ether

1:7).

**<sup>1</sup>H NMR (400 MHz, CDCl<sub>3</sub>):** δ 8.26 (d, *J* = 7.8 Hz, 1H), 7.93 (d, *J* = 7.9 Hz, 1H), 7.54-7.43 (m, 3H), 7.40-7.24 (m, 7H), 7.19-7.10 (m, 1H), 5.44 (s, 1H), 4.20 (d, *J* = 8.2 Hz, 1H), 4.09 (d, *J* = 8.1 Hz, 1H), 3.87 (s, 3H), 0.93 (s, 3H), 0.71 (s, 3H).

**<sup>13</sup>C NMR (101 MHz, CDCl<sub>3</sub>):** δ 147.5, 145.8, 140.5, 138.0, 131.2, 129.9, 128.8, 128.5, 128.1, 128.1, 125.7, 124.8, 123.1, 123.0, 122.7, 121.2, 121.0, 120.5, 120.2, 111.0, 109.7, 104.9, 84.7, 44.3, 31.9, 27.2, 26.0.

**HRMS (ESI-TOF) m/z:** [M + H]<sup>+</sup> Calcd for C<sub>29</sub>H<sub>26</sub>NO<sub>2</sub> 420.1958; found 420.1969.

#### 4-(4-bromo-1-methyl-1H-indol-3-yl)-3,3-dimethyl-2,3-

#### dihydronaphtho[1,2-b]furan-5-ol (3x)

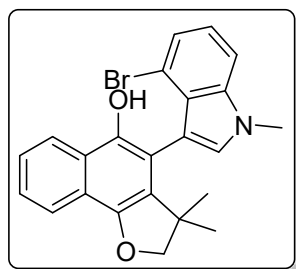

**3x**

White solid, m.p. 166-167°C, 69 mg, yield: 54%; R<sub>f</sub> = 0.32 (EtOAc/Petroleum ether 1:7).

**<sup>1</sup>H NMR (400 MHz, CDCl<sub>3</sub>):** δ 8.22 (d, *J* = 8.2 Hz, 1H), 7.98 (d, *J* = 7.9 Hz, 1H), 7.57-7.44 (m, 2H), 7.41 (d, *J* = 8.2 Hz, 1H), 7.31 (d, *J* = 7.5 Hz, 1H), 7.19-7.12 (m, 2H), 5.07 (s, 1H), 4.34 (s, 2H), 3.93 (s, 3H), 1.26 (s, 3H), 1.02 (s, 3H).

**<sup>13</sup>C NMR (101 MHz, CDCl<sub>3</sub>):** δ 147.3, 145.5, 137.9, 131.2, 128.3, 126.4, 125.8, 124.9, 124.6, 123.3, 123.0, 122.9, 121.2, 121.0, 114.9, 111.0, 109.0, 106.2, 84.9, 44.5, 33.4, 28.6, 25.6.

**HRMS (ESI-TOF) m/z:** [M + H]<sup>+</sup> Calcd for C<sub>23</sub>H<sub>21</sub>BrNO<sub>2</sub> 422.0750; found 422.0754.

#### 4-(5-bromo-1-methyl-1H-indol-3-yl)-3,3-dimethyl-2,3-

#### dihydronaphtho[1,2-b]furan-5-ol (3y)

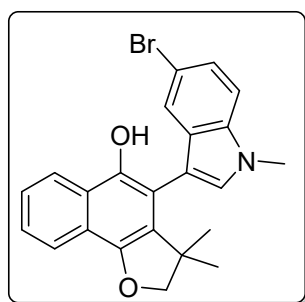

**3y**

White solid, m.p. 243-244°C, 75 mg, yield: 59%; R<sub>f</sub> = 0.32 (EtOAc/Petroleum ether

1:7).

**<sup>1</sup>H NMR (400 MHz, CDCl<sub>3</sub>):** δ 8.18 (d, *J* = 8.2 Hz, 1H), 7.97 (d, *J* = 8.1 Hz, 1H), 7.54-7.42 (m, 3H), 7.39 (d, *J* = 8.8 Hz, 1H), 7.30 (d, *J* = 8.7 Hz, 1H), 5.11 (s, 1H), 4.33 (d, *J* = 8.2 Hz, 1H), 4.29 (d, *J* = 8.2 Hz, 1H), 3.91 (s, 3H), 1.26 (s, 3H), 0.93 (s, 3H).

**<sup>13</sup>C NMR (101 MHz, CDCl<sub>3</sub>):** δ 147.6, 144.9, 135.7, 130.7, 130.1, 128.1, 126.0, 125.5, 125.1, 123.2, 122.8, 122.6, 121.3, 120.9, 113.8, 111.1, 109.5, 105.8, 84.9, 44.4, 33.3, 28.1, 26.4.

**HRMS (ESI-TOF) m/z:** [M + H]<sup>+</sup> Calcd for C<sub>23</sub>H<sub>21</sub>BrNO<sub>2</sub> 422.0750; found 422.0757.

### 4-(6-methoxy-1-methyl-1H-indol-3-yl)-3,3-dimethyl-2,3-

### dihydronaphtho[1,2-b]furan-5-ol (3z)

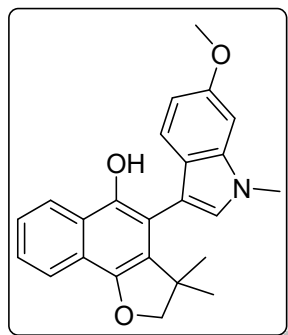

**3z**

White solid, m.p. 170-171°C, 55 mg, yield: 49%; R<sub>f</sub> = 0.26 (EtOAc/Petroleum ether 1:7).

**<sup>1</sup>H NMR (400 MHz, CDCl<sub>3</sub>):** δ 8.18 (d, *J* = 8.1 Hz, 1H), 7.96 (d, *J* = 8.0 Hz, 1H), 7.46 (m, 2H), 7.19 (d, *J* = 8.6 Hz, 1H), 7.01 (s, 1H), 6.87 (d, *J* = 2.2 Hz, 1H), 6.79 (dd, *J* = 8.7, 2.2 Hz, 1H), 5.27 (s, 1H), 4.33 (d, *J* = 8.2 Hz, 1H), 4.28 (d, *J* = 8.2 Hz, 1H), 3.91 (s, 3H), 3.87 (s, 3H), 1.27 (s, 3H), 0.96 (s, 3H).

**<sup>13</sup>C NMR (101 MHz, CDCl<sub>3</sub>):** δ 157.0, 147.5, 144.9, 137.8, 134.3, 128.4, 127.7, 125.7, 124.9, 123.1, 122.8, 121.2, 121.0, 120.7, 110.5, 110.1, 106.1, 92.9, 84.9, 77.3, 77.0, 76.7, 55.7, 44.5, 33.1, 28.0, 26.4.

**HRMS (ESI-TOF) m/z:** [M + H]<sup>+</sup> Calcd for C<sub>24</sub>H<sub>24</sub>NO<sub>3</sub> 374.1751; found 374.1761.

### 4-(6-fluoro-1-methyl-1H-indol-3-yl)-3,3-dimethyl-2,3-

### dihydronaphtho[1,2-b]furan-5-ol (3aa)

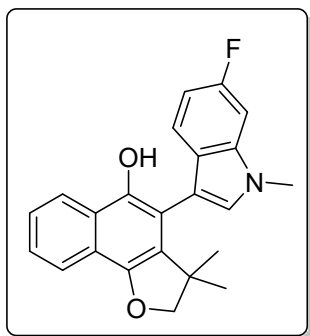

**3aa**

White solid, m.p. 251-252°C, 72 mg, yield: 66%;  $R_f = 0.38$  (EtOAc/Petroleum ether 1:7).

**$^1\text{H}$  NMR (400 MHz,  $\text{CDCl}_3$ ):**  $\delta$  8.17 (d,  $J = 8.1$  Hz, 1H), 7.96 (d,  $J = 7.4$  Hz, 1H), 7.54-7.41 (m, 2H), 7.22 (dd,  $J = 8.7, 5.3$  Hz, 1H), 7.13-7.07 (m, 2H), 6.89 (td,  $J = 9.1, 2.3$  Hz, 1H), 5.17 (s, 1H), 4.33 (d,  $J = 8.2$  Hz, 1H), 4.29 (d,  $J = 8.2$  Hz, 1H), 3.88 (s, 3H), 1.26 (s, 3H), 0.93 (s, 3H).

**$^{13}\text{C}$  NMR (101 MHz,  $\text{CDCl}_3$ ):**  $\delta$  161.5-159.2 ( $J = 232.3$  Hz), 147.6, 144.8, 137.1-137.0 ( $J = 10.1$  Hz), 134.6, 134.3 ( $J = 2.6$  Hz), 129.9 ( $J = 3.6$  Hz), 128.2, 127.8, 125.9, 125.0, 123.1, 122.8, 121.2 ( $J = 2.6$  Hz), 121.1, 120.9, 109.9, 109.2-108.9 ( $J = 30.3$  Hz), 106.5, 96.1-95.8 ( $J = 30.3$  Hz), 84.9, 44.4, 33.2, 28.0, 26.4.

**HRMS (ESI-TOF) m/z:**  $[\text{M} + \text{H}]^+$  Calcd for  $\text{C}_{23}\text{H}_{21}\text{FNO}_2$  362.1551; found 362.1564.

#### 4-(6-chloro-1-methyl-1H-indol-3-yl)-3,3-dimethyl-2,3-

#### dihydronaphtho[1,2-b]furan-5-ol (3ab)

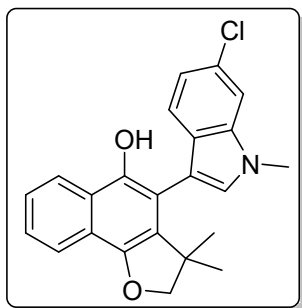

**3ab**

White solid, m.p. 253-254°C, 76 mg, yield: 67%;  $R_f = 0.38$  (EtOAc/Petroleum ether 1:7).

**$^1\text{H}$  NMR (400 MHz,  $\text{CDCl}_3$ ):**  $\delta$  8.21 (d,  $J = 8.2$  Hz, 1H), 8.00 (d,  $J = 8.1$  Hz, 1H), 7.58-7.42 (m, 3H), 7.30-7.22 (m, 1H), 7.18-7.08 (m, 2H), 5.17 (s, 1H), 4.35 (d,  $J = 8.2$  Hz, 1H), 4.31 (d,  $J = 8.6$  Hz, 1H), 3.90 (s, 3H), 1.28 (s, 3H), 0.95 (s, 3H).

**$^{13}\text{C}$  NMR (101 MHz,  $\text{CDCl}_3$ ):**  $\delta$  147.6, 144.9, 137.4, 130.3, 128.7, 128.2, 127.0, 126.0, 125.1, 123.2, 122.8, 121.3, 121.2, 121.0, 120.9, 109.7, 109.7, 106.5, 84.9, 44.4, 33.2, 28.0, 26.4.

**HRMS (ESI-TOF) m/z:**  $[\text{M} + \text{H}]^+$  Calcd for  $\text{C}_{23}\text{H}_{21}\text{ClNO}_2$  378.1255; found 378.1253.

#### 4-(1,7-dimethyl-1H-indol-3-yl)-3,3-dimethyl-2,3-dihydronaphtho[1,2-

### b]furan-5-ol (3ac)

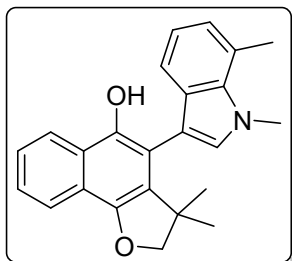

**3ac**

White solid, m.p. 196-197°C, 75 mg, yield: 70%;  $R_f = 0.33$  (EtOAc/Petroleum ether 1:7).

**$^1\text{H}$  NMR (400 MHz,  $\text{CDCl}_3$ ):**  $\delta$  8.20 (d,  $J = 7.3$  Hz, 1H), 7.97 (d,  $J = 8.0$  Hz, 1H), 7.54-7.40 (m, 2H), 7.16-7.08 (m, 1H), 7.02 (s, 1H), 7.02-6.92 (m, 2H), 5.23 (s, 1H), 4.34 (d,  $J = 8.3$  Hz, 1H), 4.29 (d,  $J = 8.2$  Hz, 1H), 4.18 (s, 3H), 2.86 (s, 3H), 1.29 (s, 3H), 0.96 (s, 3H).

**$^{13}\text{C}$  NMR (101 MHz,  $\text{CDCl}_3$ ):**  $\delta$  147.5, 144.9, 135.8, 131.2, 129.5, 128.4, 125.7, 125.1, 124.9, 123.1, 122.9, 121.4, 121.2, 120.8, 120.3, 118.4, 110.5, 105.8, 84.9, 44.5, 37.0, 28.1, 26.4, 19.7.

**HRMS (ESI-TOF)  $m/z$ :**  $[\text{M} + \text{H}]^+$  Calcd for  $\text{C}_{24}\text{H}_{24}\text{NO}_2$  358.1802; found 358.1800.

### 4-(1H-indol-1-yl)-3,3-dimethyl-2,3-dihydro-1-benzofuran-5-ol

#### (3ad)

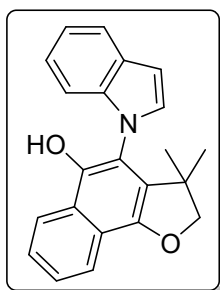

**3ad**

White solid, m.p. 138-139°C, 69 mg, yield: 70%;  $R_f = 0.53$  (EtOAc/Petroleum ether 1:15).

**$^1\text{H}$  NMR (400 MHz,  $\text{CDCl}_3$ ):**  $\delta$  8.22 (d,  $J = 8.3$  Hz, 1H), 7.99 (d,  $J = 7.8$  Hz, 1H), 7.77-7.69 (m, 1H), 7.61-7.47 (m, 2H), 7.25-7.14 (m, 3H), 7.04-6.99 (m, 1H), 6.80 (d,  $J = 2.3$  Hz, 1H), 4.88 (s, 1H), 4.34 (d,  $J = 8.3$  Hz, 1H), 4.30 (d,  $J = 8.3$  Hz, 1H), 1.22 (s, 3H), 0.79 (s, 3H).

**$^{13}\text{C}$  NMR (101 MHz,  $\text{CDCl}_3$ ):**  $\delta$  148.6, 143.6, 137.6, 134.6, 129.6, 128.3, 127.7, 126.8, 125.8, 123.9, 123.1, 122.9, 121.4, 121.1, 120.7, 115.9, 110.7, 104.0, 85.2, 44.4, 27.3, 26.0.

**HRMS (ESI-TOF)  $m/z$ :**  $[\text{M} + \text{H}]^+$  Calcd for  $\text{C}_{22}\text{H}_{20}\text{NO}_2$  330.1489; found 330.1490.



**7,8-dibromo-3,3-dimethyl-4-(1-methyl-1H-indol-3-yl)-2,3-dihydronaphtho[1,2-b]furan-5-ol (3ae)**

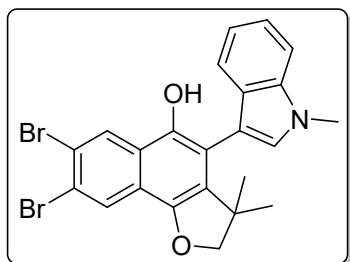

**3ae**

White solid, m.p. 195-196°C, 111 mg, yield: 74%;  $R_f = 0.23$  (EtOAc/Petroleum ether 1:7).

**$^1\text{H NMR}$  (400 MHz,  $\text{CDCl}_3$ ):**  $\delta$  8.5 (s, 1H), 8.3 (s, 1H), 7.4 (d,  $J = 8.3$  Hz, 1H), 7.4-7.3 (m, 1H), 7.3 (d,  $J = 8.2$  Hz, 1H), 7.2-7.1 (m, 2H), 5.2 (s, 1H), 4.3 (d,  $J = 8.3$  Hz, 1H), 4.3 (d,  $J = 8.3$  Hz, 1H), 3.9 (s, 3H), 1.3 (s, 3H), 0.9 (s, 3H).

**$^{13}\text{C NMR}$  (101 MHz,  $\text{CDCl}_3$ ):**  $\delta$  146.6, 144.1, 137.0, 130.3, 129.5, 128.1, 127.9, 126.2, 122.7, 121.9, 121.0, 120.3, 120.2, 120.0, 112.3, 109.6, 105.2, 85.1, 44.6, 33.2, 27.9, 26.2.

**HRMS (ESI-TOF)  $m/z$ :**  $[\text{M} + \text{H}]^+$  Calcd for  $\text{C}_{23}\text{H}_{20}\text{Br}_2\text{NO}_2$  499.9855; found 499.9856.

**3,3-dimethyl-4-phenyl-2,3-dihydronaphtho[1,2-b]furan-5-ol (3af)**

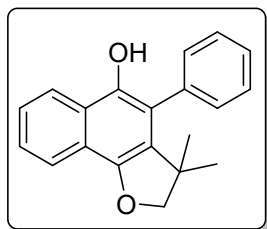

**3af**

White solid, m.p. 150-151°C, 63 mg, yield: 72%;  $R_f = 0.51$  (EtOAc/Petroleum ether 1:15).

**$^1\text{H NMR}$  (400 MHz,  $\text{CDCl}_3$ ):**  $\delta$  8.17 (d,  $J = 8.0$  Hz, 1H), 7.95 (d,  $J = 8.2$  Hz, 1H), 7.58-7.41 (m, 5H), 7.40 (d,  $J = 7.9$  Hz, 2H), 4.79 (s, 1H), 4.30 (s, 2H), 1.10 (s, 6H).

**$^{13}\text{C NMR}$  (101 MHz,  $\text{CDCl}_3$ ):**  $\delta$  147.8, 142.4, 133.7, 131.3, 129.0, 128.7, 127.8, 126.4, 125.8, 125.3, 123.5, 122.7, 121.3, 120.6, 119.2, 85.0, 44.4, 27.2.

**HRMS (ESI-TOF)  $m/z$ :**  $[\text{M} + \text{H}]^+$  Calcd for  $\text{C}_{20}\text{H}_{19}\text{O}_2$  291.1380; found 291.1389.

**4-(4-fluorophenyl)-3,3-dimethyl-2,3-dihydronaphtho[1,2-b]furan-5-ol**

**(3ag)**

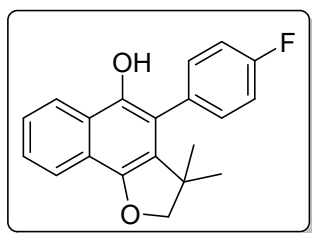

**3ag**

White solid, m.p. 156-158°C, 86 mg, yield: 93%;  $R_f$  = 0.51 (EtOAc/Petroleum ether 1:15).

$^1\text{H NMR}$  (400 MHz,  $\text{CDCl}_3$ ):  $\delta$  8.16 (d,  $J$  = 7.2 Hz, 1H), 7.95 (d,  $J$  = 7.8 Hz, 1H), 7.51-7.44 (m, 2H), 7.42-7.31 (m, 2H), 7.22 (d,  $J$  = 8.8 Hz, 2H), 4.72 (s, 1H), 4.30 (s, 2H), 1.09 (s, 6H).

$^{13}\text{C NMR}$  (101 MHz,  $\text{CDCl}_3$ ):  $\delta$  164.1-161.6 (d,  $J$  = 11.0 Hz), 147.9, 142.6, 134.6, 134.4 ( $J$  = 11.0 Hz), 133.1, 130.1, 127.8, 127.7, 126.0, 125.4, 123.5, 122.7, 121.3, 120.8, 118.1, 116.2 ( $J$  = 21.6 Hz), 85.0, 58.9, 27.2, 18.3.

$^{19}\text{F NMR}$  (376 MHz,  $\text{CDCl}_3$ ):  $\delta$  -112.75.

HRMS (ESI-TOF)  $m/z$ :  $[\text{M} + \text{H}]^+$  Calcd for  $\text{C}_{20}\text{H}_{18}\text{FO}_2$  309.1285; found 309.1288.

#### 4-(4-methoxyphenyl)-3,3-dimethyl-2,3-dihydro-1H-naphtho[1,2-b]furan-5-ol (3ah)

#### 5-ol (3ah)

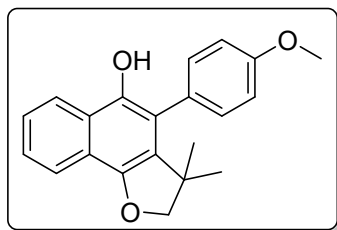

**3ah**

White solid, m.p. 166-167°C, 48 mg, yield: 50%;  $R_f$  = 0.33 (EtOAc/Petroleum ether 1:15).

$^1\text{H NMR}$  (400 MHz,  $\text{CDCl}_3$ ):  $\delta$  8.2 (d,  $J$  = 7.4 Hz, 1H), 7.9 (d,  $J$  = 9.3 Hz, 1H), 7.5 (m, 2H), 7.3 (d,  $J$  = 8.5 Hz, 2H), 7.1 (d,  $J$  = 8.6 Hz, 2H), 4.9 (s, 1H), 4.3 (s, 2H), 3.9 (s, 3H), 1.1 (s, 6H).

$^{13}\text{C NMR}$  (101 MHz,  $\text{CDCl}_3$ ):  $\delta$  159.8, 147.7, 142.9, 132.5, 126.9, 125.8, 125.3, 125.2, 123.3, 122.7, 121.2, 120.6, 118.8, 114.4, 85.0, 55.3, 44.4, 27.2.

HRMS (ESI-TOF)  $m/z$ :  $[\text{M} + \text{H}]^+$  Calcd for  $\text{C}_{21}\text{H}_{21}\text{O}_3$  321.1485; found 321.1485.

#### 3,3-dimethyl-4-(naphthalen-2-yl)-2,3-dihydro-1H-naphtho[1,2-b]furan-5-ol (3ai)

#### ol (3ai)

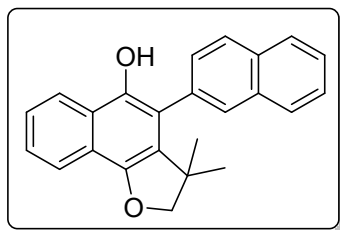

**3ai**

White solid, m.p. 142-143°C, 62 mg, yield: 61%;  $R_f = 0.37$  (EtOAc/Petroleum ether 1:15).

**$^1\text{H NMR}$  (400 MHz,  $\text{CDCl}_3$ ):**  $\delta$  8.2 (d,  $J = 7.7$  Hz, 1H), 8.0 (d,  $J = 8.3$  Hz, 1H), 8.0-7.9 (m, 2H), 7.9 (d,  $J = 5.7$  Hz, 2H), 7.6 (m, 2H), 7.5-7.4 (m, 3H), 4.8 (s, 1H), 4.3 (s, 2H), 1.1 (s, 6H).

**$^{13}\text{C NMR}$  (101 MHz,  $\text{CDCl}_3$ ):**  $\delta$  147.9, 142.7, 134.7, 134.5, 133.9, 133.1, 131.3, 130.4, 130.0, 128.8, 127.9, 127.7, 126.8, 125.9, 125.4, 123.6, 122.7, 121.3, 120.8, 119.1, 85.1, 77.3, 77.0, 76.7, 44.5, 27.5, 18.1.

**HRMS (ESI-TOF)  $m/z$ :**  $[\text{M} + \text{H}]^+$  Calcd for  $\text{C}_{24}\text{H}_{21}\text{O}_2$  341.1536; found 341.1541.

**2-(1-((*tert*-butyldimethylsilyl)oxy)-2-methylpropan-2-yl)-3-(1-methyl-1*H*-indol-3-yl)-2,3-dihydronaphthalene-1,4-dione (4a)**

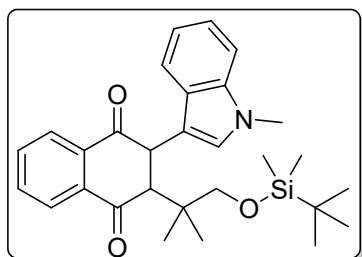

**4a**

Yellow solid, m.p. 190-192°C, 90 mg, yield: 63%;  $R_f = 0.53$  (EtOAc/Petroleum ether 1:7).

**$^1\text{H NMR}$  (400 MHz,  $\text{CDCl}_3$ ):**  $\delta$  8.10 (d,  $J = 7.9$  Hz, 1H), 7.97 (d,  $J = 7.6$  Hz, 1H), 7.81 (d,  $J = 7.5$  Hz, 1H), 7.76-7.72 (m, 1H), 7.70-7.66 (m, 1H), 7.24-7.18 (m, 3H), 6.49 (s, 1H), 4.89 (d,  $J = 4.5$  Hz, 1H), 3.80 (d,  $J = 4.5$  Hz, 1H), 3.58 (s, 3H), 3.54 (d,  $J = 8.7$  Hz, 1H), 3.40 (d,  $J = 9.5$  Hz, 1H), 1.02 (s, 3H), 0.91 (s, 3H), 0.86 (s, 9H), 0.08 (s, 3H), 0.01 (s, 3H).

**$^{13}\text{C NMR}$  (101 MHz,  $\text{CDCl}_3$ ):**  $\delta$  199.0, 194.2, 137.3, 136.4, 133.8, 133.8, 127.9, 127.8, 126.9, 126.0, 122.3, 119.8, 118.9, 109.3, 108.8, 70.9, 47.6, 38.4, 32.9, 25.9, 23.8, 22.8, 18.2, -5.4, -5.6.

**HRMS (ESI-TOF)  $m/z$ :**  $[\text{M} + \text{H}]^+$  Calcd for  $\text{C}_{29}\text{H}_{38}\text{NO}_3\text{Si}$  476.2616; found 476.2616.

**3,3-dimethyl-2,3-dihydronaphtho[1,2-*b*]furan-4,5-dione (5a)**

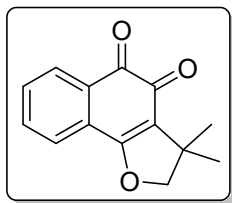

**5a**

Yellow solid, m.p. 101-102°C, 18 mg, yield: 78%;  $R_f = 0.34$  (EtOAc/Petroleum ether 1:3).

**$^1\text{H NMR}$  (400 MHz,  $\text{CDCl}_3$ ):**  $\delta$  8.05 (d,  $J = 8.4$  Hz, 1H), 7.69-7.59 (m, 2H), 7.56 (m, 1H), 4.47 (s, 2H), 1.48 (s, 6H).

**$^{13}\text{C NMR}$  (101 MHz,  $\text{CDCl}_3$ ):**  $\delta$  181.4, 175.3, 169.0, 134.5, 131.7, 130.8, 129.3, 127.8, 124.4, 122.8, 87.3, 42.5, 25.9.

**HRMS (ESI-TOF)  $m/z$ :**  $[\text{M} + \text{Na}]^+$  Calcd for  $\text{C}_{14}\text{H}_{12}\text{O}_3\text{Na}$  251.0679; found 251.0683.

### **1-bromo-5,8,8-trimethyl-7,8-dihydro-5H-**

### **naphtho[2',3':4,5]oxepino[2,3-b]indole-9,14-dione (6a)**

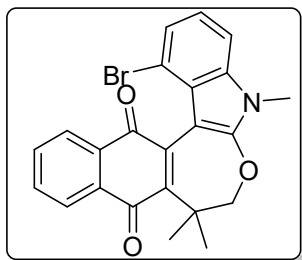

**6a**

Red solid, m.p. 209-210°C, 23 mg, yield: 53%;  $R_f = 0.33$  (EtOAc/Petroleum ether 1:7).

**$^1\text{H NMR}$  (400 MHz,  $\text{CDCl}_3$ ):**  $\delta$  8.07 (m, 2H), 7.75-7.63 (m, 2H), 7.32-7.26 (m, 1H), 7.16 (d,  $J = 8.1$  Hz, 1H), 7.03 (m, 1H), 4.38 (d,  $J = 11.7$  Hz, 1H), 4.22 (d,  $J = 11.6$  Hz, 1H), 3.63 (s, 3H), 1.71 (s, 3H).

**$^{13}\text{C NMR}$  (101 MHz,  $\text{CDCl}_3$ ):**  $\delta$  187.5, 183.1, 155.5, 145.0, 144.6, 134.4, 133.6, 133.0, 132.5, 126.7, 126.1, 125.9, 125.5, 122.2, 113.8, 107.9, 90.6, 82.9, 42.0, 28.0, 27.0, 20.6.

**HRMS (ESI-TOF)  $m/z$ :**  $[\text{M} + \text{H}]^+$  Calcd for  $\text{C}_{23}\text{H}_{19}\text{BrNO}_3$  436.0543; found 436.0544.

## 8. X-Ray Analysis

Compound **3a** X-Ray crystal diffraction data: Crystals were grown in slow diffusion with EA as clusters of colorless prisms. The ellipsoids are shown at 30% probability levels. Compounds **3a** was collected at 100 K on a Rigaku Oxford Diffraction Supernova Dual Source, Cu at Zero equipped with an AtlasS2 CCD using Cu K $\alpha$  radiation. The data were collected and processed using CrysAlisPro. The structure was solved by direct methods using Olex2 software, and the non-hydrogen atoms were located from the trial structure and then refined anisotropically with SHELXL-2018 using a full-matrix least squares procedure based on  $F^2$ . The weighted  $R$  factor,  $wR$  and goodness-of-fit  $S$  values were obtained based on  $F^2$ . The hydrogen atom positions were fixed geometrically at the calculated distances and allowed to ride on their parent atoms. Crystallographic data for the structure reported in this paper have been deposited at the Cambridge Crystallographic Data Center and allocated with the deposition numbers: CCDC 2079811 for compounds **3a**.

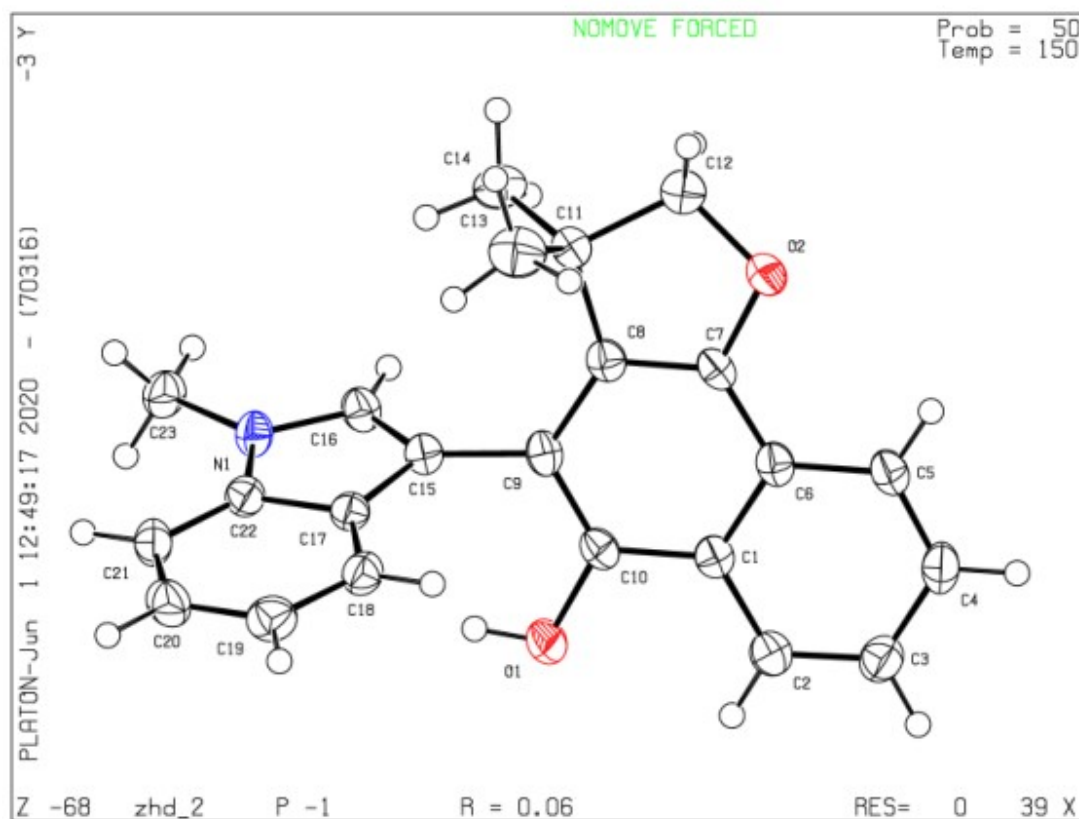

Figure S1. ORTEP Drawing of **3a** (The ellipsoids are shown at 30% probability levels)

**Table 1** Crystal data and structure refinement for **3a**.

|                     |                                                 |
|---------------------|-------------------------------------------------|
| Identification code | 3a                                              |
| Empirical formula   | C <sub>23</sub> H <sub>21</sub> NO <sub>2</sub> |
| Formula weight      | 343.41                                          |
| Temperature/K       | 150.00(16)                                      |
| Crystal system      | triclinic                                       |
| Space group         | P-1                                             |

|                                             |                                                                |
|---------------------------------------------|----------------------------------------------------------------|
| a/Å                                         | 9.3482(13)                                                     |
| b/Å                                         | 9.9667(14)                                                     |
| c/Å                                         | 11.3283(15)                                                    |
| $\alpha$ /°                                 | 111.927(13)                                                    |
| $\beta$ /°                                  | 101.129(12)                                                    |
| $\gamma$ /°                                 | 108.193(13)                                                    |
| Volume/Å <sup>3</sup>                       | 870.9(2)                                                       |
| Z                                           | 2                                                              |
| $\rho_{\text{calc}}$ /g/cm <sup>3</sup>     | 1.310                                                          |
| $\mu$ /mm <sup>-1</sup>                     | 0.083                                                          |
| F(000)                                      | 364.0                                                          |
| Crystal size/mm <sup>3</sup>                | 0.14 × 0.13 × 0.12                                             |
| Radiation                                   | Mo K $\alpha$ ( $\lambda$ = 0.71073)                           |
| 2 $\Theta$ range for data collection/°      | 4.14 to 49.994                                                 |
| Index ranges                                | -11 ≤ h ≤ 10, -11 ≤ k ≤ 11, -11 ≤ l ≤ 13                       |
| Reflections collected                       | 6225                                                           |
| Independent reflections                     | 3034 [ $R_{\text{int}}$ = 0.0477, $R_{\text{sigma}}$ = 0.0640] |
| Data/restraints/parameters                  | 3034/0/242                                                     |
| Goodness-of-fit on F <sup>2</sup>           | 1.054                                                          |
| Final R indexes [ $I \geq 2\sigma(I)$ ]     | $R_1$ = 0.0585, $wR_2$ = 0.1441                                |
| Final R indexes [all data]                  | $R_1$ = 0.0787, $wR_2$ = 0.1644                                |
| Largest diff. peak/hole / e Å <sup>-3</sup> | 0.27/-0.25                                                     |

### Crystal structure determination of [3a]

**Crystal Data** for C<sub>23</sub>H<sub>21</sub>NO<sub>2</sub> ( $M$  = 343.41 g/mol): triclinic, space group P-1 (no. 2),  $a$  = 9.3482(13) Å,  $b$  = 9.9667(14) Å,  $c$  = 11.3283(15) Å,  $\alpha$  = 111.927(13)°,  $\beta$  = 101.129(12)°,  $\gamma$  = 108.193(13)°,  $V$  = 870.9(2) Å<sup>3</sup>,  $Z$  = 2,  $T$  = 150.00(16) K,  $\mu$ (Mo K $\alpha$ ) = 0.083 mm<sup>-1</sup>,  $D_{\text{calc}}$  = 1.310 g/cm<sup>3</sup>, 6225 reflections measured (4.14° ≤ 2 $\Theta$  ≤ 49.994°), 3034 unique ( $R_{\text{int}}$  = 0.0477,  $R_{\text{sigma}}$  = 0.0640) which were used in all calculations. The final  $R_1$  was 0.0585 ( $I > 2\sigma(I)$ ) and  $wR_2$  was 0.1644 (all data).

**Table 2 Fractional Atomic Coordinates (×10<sup>4</sup>) and Equivalent Isotropic Displacement Parameters (Å<sup>2</sup>×10<sup>3</sup>) for 3a.  $U_{\text{eq}}$  is defined as 1/3 of the trace of the orthogonalised  $U_{ij}$  tensor.**

| Atom | $x$       | $y$       | $z$      | $U(\text{eq})$ |
|------|-----------|-----------|----------|----------------|
| C1   | -8542(3)  | -13042(3) | -5251(2) | 24.4(5)        |
| C2   | -10053(3) | -14243(3) | -6219(2) | 29.1(6)        |
| C3   | -10262(3) | -15783(3) | -6920(3) | 34.6(6)        |
| C4   | -8970(3)  | -16202(3) | -6690(3) | 34.1(6)        |
| C5   | -7483(3)  | -15077(3) | -5792(2) | 28.5(6)        |
| C6   | -7226(3)  | -13461(3) | -5056(2) | 25.5(5)        |

**Table 2 Fractional Atomic Coordinates ( $\times 10^4$ ) and Equivalent Isotropic Displacement Parameters ( $\text{\AA}^2 \times 10^3$ ) for 3a.  $U_{eq}$  is defined as 1/3 of the trace of the orthogonalised  $U_{ij}$  tensor.**

| Atom | x           | y            | z           | U(eq)   |
|------|-------------|--------------|-------------|---------|
| C7   | -5737(3)    | -12226(3)    | -4124(2)    | 24.6(5) |
| C8   | -5481(3)    | -10672(3)    | -3407(2)    | 25.6(5) |
| C9   | -6795(3)    | -10240(3)    | -3576(2)    | 24.5(5) |
| C10  | -8285(3)    | -11432(3)    | -4490(2)    | 25.4(5) |
| C11  | -3748(3)    | -9708(3)     | -2433(2)    | 27.4(6) |
| C12  | -3060(3)    | -10937(3)    | -2978(3)    | 43.1(7) |
| C13  | -3678(3)    | -9315(4)     | -974(3)     | 42.7(7) |
| C14  | -2821(3)    | -8201(3)     | -2511(3)    | 37.7(7) |
| C15  | -6664(3)    | -8597(3)     | -2823(2)    | 25.7(5) |
| C16  | -5984(3)    | -7299(3)     | -3011(2)    | 28.4(6) |
| C17  | -7375(3)    | -8097(3)     | -1809(2)    | 24.9(5) |
| C18  | -8242(3)    | -8850(3)     | -1182(2)    | 29.5(6) |
| C19  | -8768(3)    | -7994(3)     | -230(3)     | 35.9(6) |
| C20  | -8439(3)    | -6400(3)     | 116(3)      | 35.8(6) |
| C21  | -7587(3)    | -5622(3)     | -470(2)     | 30.9(6) |
| C22  | -7047(3)    | -6483(3)     | -1436(2)    | 25.8(5) |
| C23  | -5548(3)    | -4426(3)     | -2062(3)    | 33.3(6) |
| N1   | -6201(2)    | -6026(2)     | -2189(2)    | 27.8(5) |
| O1   | -9611(2)    | -11120(2)    | -4726.1(19) | 34.8(5) |
| O2   | -4378.5(19) | -12496.5(19) | -3823.1(17) | 31.7(4) |

**Table 3 Anisotropic Displacement Parameters ( $\text{\AA}^2 \times 10^3$ ) for 3a. The Anisotropic displacement factor exponent takes the form:  $-2\pi^2[h^2a^{*2}U_{11}+2hka^*b^*U_{12}+\dots]$ .**

| Atom | $U_{11}$ | $U_{22}$ | $U_{33}$ | $U_{23}$ | $U_{13}$ | $U_{12}$ |
|------|----------|----------|----------|----------|----------|----------|
| C1   | 29.2(13) | 24.9(13) | 25.9(13) | 15.3(11) | 13.4(10) | 12.9(10) |
| C2   | 31.8(13) | 30.1(14) | 29.0(14) | 15.4(12) | 11.6(11) | 15.1(11) |
| C3   | 33.5(14) | 29.6(15) | 32.0(14) | 9.4(13)  | 10.7(12) | 9.4(11)  |
| C4   | 43.0(15) | 23.2(14) | 35.6(15) | 10.4(12) | 19.6(12) | 13.8(12) |
| C5   | 34.5(13) | 27.0(14) | 33.7(14) | 16.7(12) | 18.2(11) | 18.0(11) |
| C6   | 32.2(13) | 24.7(13) | 27.5(13) | 14.9(11) | 17.6(11) | 14.1(11) |
| C7   | 28.6(12) | 27.8(14) | 28.5(13) | 16.5(12) | 15.9(10) | 17.5(11) |
| C8   | 29.4(13) | 26.3(13) | 25.8(13) | 13.7(11) | 13.5(10) | 12.9(10) |
| C9   | 33.7(13) | 23.8(13) | 23.5(12) | 14.1(11) | 12.4(10) | 16.0(11) |
| C10  | 28.2(12) | 27.8(14) | 28.4(13) | 15.9(12) | 12.7(10) | 16.4(11) |
| C11  | 27.2(12) | 26.8(14) | 29.2(13) | 12.2(12) | 11.0(11) | 13.1(10) |
| C12  | 30.5(14) | 33.2(16) | 52.3(18) | 9.6(14)  | 8.5(13)  | 13.7(12) |
| C13  | 40.2(15) | 52.8(19) | 36.5(16) | 23.4(15) | 11.9(13) | 19.2(14) |

**Table 3 Anisotropic Displacement Parameters ( $\text{\AA}^2 \times 10^3$ ) for 3a. The Anisotropic displacement factor exponent takes the form:  $-2\pi^2[h^2a^{*2}U_{11}+2hka^*b^*U_{12}+\dots]$ .**

| Atom | $U_{11}$ | $U_{22}$ | $U_{33}$ | $U_{23}$ | $U_{13}$ | $U_{12}$ |
|------|----------|----------|----------|----------|----------|----------|
| C14  | 29.5(14) | 39.6(17) | 42.1(16) | 21.3(14) | 11.5(12) | 10.2(12) |
| C15  | 26.5(12) | 24.1(13) | 26.4(13) | 10.7(11) | 9.4(10)  | 11.7(10) |
| C16  | 32.1(13) | 28.6(14) | 27.8(13) | 12.6(12) | 14.0(11) | 15.4(11) |
| C17  | 23.0(12) | 24.0(13) | 25.4(13) | 10.7(11) | 5.2(10)  | 10.1(10) |
| C18  | 29.9(13) | 24.1(14) | 31.4(14) | 12.3(12) | 8.3(11)  | 9.7(11)  |
| C19  | 33.1(14) | 39.3(16) | 34.5(15) | 17.4(13) | 15.6(12) | 11.8(12) |
| C20  | 37.0(14) | 39.5(16) | 30.5(14) | 11.0(13) | 15.3(12) | 19.9(12) |
| C21  | 35.5(14) | 24.6(14) | 29.4(14) | 8.8(12)  | 9.7(11)  | 14.5(11) |
| C22  | 25.9(12) | 24.4(13) | 25.6(13) | 11.2(11) | 6.9(10)  | 10.8(10) |
| C23  | 35.1(14) | 24.7(14) | 40.3(15) | 17.3(13) | 11.5(12) | 11.3(11) |
| N1   | 33.2(11) | 21.0(11) | 30.4(11) | 12.4(10) | 11.8(9)  | 12.1(9)  |
| O1   | 31.7(9)  | 29.8(11) | 40.3(11) | 12.4(10) | 6.9(8)   | 18.2(8)  |
| O2   | 28.6(9)  | 28.3(10) | 41.6(11) | 15.5(9)  | 13.9(8)  | 16.1(8)  |

**Table 4 Bond Lengths for 3a.**

| Atom | Atom | Length/ $\text{\AA}$ | Atom | Atom | Length/ $\text{\AA}$ |
|------|------|----------------------|------|------|----------------------|
| C1   | C2   | 1.413(3)             | C11  | C12  | 1.541(3)             |
| C1   | C6   | 1.422(3)             | C11  | C13  | 1.532(3)             |
| C1   | C10  | 1.422(3)             | C11  | C14  | 1.527(3)             |
| C2   | C3   | 1.367(3)             | C12  | O2   | 1.445(3)             |
| C3   | C4   | 1.405(3)             | C15  | C16  | 1.367(3)             |
| C4   | C5   | 1.361(4)             | C15  | C17  | 1.443(3)             |
| C5   | C6   | 1.423(3)             | C16  | N1   | 1.367(3)             |
| C6   | C7   | 1.400(3)             | C17  | C18  | 1.402(3)             |
| C7   | C8   | 1.368(3)             | C17  | C22  | 1.412(3)             |
| C7   | O2   | 1.384(3)             | C18  | C19  | 1.382(3)             |
| C8   | C9   | 1.425(3)             | C19  | C20  | 1.398(4)             |
| C8   | C11  | 1.521(3)             | C20  | C21  | 1.371(4)             |
| C9   | C10  | 1.384(3)             | C21  | C22  | 1.403(3)             |
| C9   | C15  | 1.488(3)             | C22  | N1   | 1.373(3)             |
| C10  | O1   | 1.371(3)             | C23  | N1   | 1.458(3)             |

**Table 5 Bond Angles for 3a.**

| Atom | Atom | Atom | Angle/ $^\circ$ | Atom | Atom | Atom | Angle/ $^\circ$ |
|------|------|------|-----------------|------|------|------|-----------------|
| C2   | C1   | C6   | 118.4(2)        | C8   | C11  | C14  | 115.09(19)      |
| C2   | C1   | C10  | 122.5(2)        | C13  | C11  | C12  | 111.4(2)        |
| C6   | C1   | C10  | 119.1(2)        | C14  | C11  | C12  | 109.3(2)        |
| C3   | C2   | C1   | 120.9(2)        | C14  | C11  | C13  | 110.7(2)        |



**Table 5 Bond Angles for 3a.**

| Atom | Atom | Atom | Angle/°    | Atom | Atom | Atom | Angle/°    |
|------|------|------|------------|------|------|------|------------|
| C2   | C3   | C4   | 120.4(2)   | O2   | C12  | C11  | 108.83(19) |
| C5   | C4   | C3   | 120.7(2)   | C16  | C15  | C9   | 128.2(2)   |
| C4   | C5   | C6   | 120.1(2)   | C16  | C15  | C17  | 105.8(2)   |
| C1   | C6   | C5   | 119.3(2)   | C17  | C15  | C9   | 125.8(2)   |
| C7   | C6   | C1   | 116.7(2)   | C15  | C16  | N1   | 111.1(2)   |
| C7   | C6   | C5   | 124.0(2)   | C18  | C17  | C15  | 134.2(2)   |
| C8   | C7   | C6   | 124.4(2)   | C18  | C17  | C22  | 119.0(2)   |
| C8   | C7   | O2   | 113.7(2)   | C22  | C17  | C15  | 106.7(2)   |
| O2   | C7   | C6   | 121.9(2)   | C19  | C18  | C17  | 118.9(2)   |
| C7   | C8   | C9   | 119.5(2)   | C18  | C19  | C20  | 121.1(2)   |
| C7   | C8   | C11  | 109.13(19) | C21  | C20  | C19  | 121.6(2)   |
| C9   | C8   | C11  | 131.1(2)   | C20  | C21  | C22  | 117.6(2)   |
| C8   | C9   | C15  | 124.1(2)   | C21  | C22  | C17  | 121.7(2)   |
| C10  | C9   | C8   | 117.6(2)   | N1   | C22  | C17  | 108.04(19) |
| C10  | C9   | C15  | 118.3(2)   | N1   | C22  | C21  | 130.2(2)   |
| C9   | C10  | C1   | 122.7(2)   | C16  | N1   | C22  | 108.37(19) |
| O1   | C10  | C1   | 115.8(2)   | C16  | N1   | C23  | 125.8(2)   |
| O1   | C10  | C9   | 121.5(2)   | C22  | N1   | C23  | 125.74(19) |
| C8   | C11  | C12  | 99.66(19)  | C7   | O2   | C12  | 105.75(18) |
| C8   | C11  | C13  | 110.19(19) |      |      |      |            |

**Table 6 Torsion Angles for 3a.**

| A  | B  | C   | D  | Angle/°    | A   | B   | C   | D   | Angle/°     |
|----|----|-----|----|------------|-----|-----|-----|-----|-------------|
| C1 | C2 | C3  | C4 | -0.1(4)    | C9  | C15 | C17 | C22 | -175.9(2)   |
| C1 | C6 | C7  | C8 | -0.2(3)    | C10 | C1  | C2  | C3  | -179.1(2)   |
| C1 | C6 | C7  | O2 | 178.31(18) | C10 | C1  | C6  | C5  | 178.6(2)    |
| C2 | C1 | C6  | C5 | -2.7(3)    | C10 | C1  | C6  | C7  | -0.9(3)     |
| C2 | C1 | C6  | C7 | 177.8(2)   | C10 | C9  | C15 | C16 | -106.5(3)   |
| C2 | C1 | C10 | C9 | -177.7(2)  | C10 | C9  | C15 | C17 | 67.5(3)     |
| C2 | C1 | C10 | O1 | 1.7(3)     | C11 | C8  | C9  | C10 | -174.9(2)   |
| C2 | C3 | C4  | C5 | -1.5(4)    | C11 | C8  | C9  | C15 | 4.5(4)      |
| C3 | C4 | C5  | C6 | 1.0(4)     | C11 | C12 | O2  | C7  | 16.3(3)     |
| C4 | C5 | C6  | C1 | 1.1(3)     | C13 | C11 | C12 | O2  | 99.6(3)     |
| C4 | C5 | C6  | C7 | -179.4(2)  | C14 | C11 | C12 | O2  | -137.7(2)   |
| C5 | C6 | C7  | C8 | -179.7(2)  | C15 | C9  | C10 | C1  | -179.43(19) |
| C5 | C6 | C7  | O2 | -1.2(3)    | C15 | C9  | C10 | O1  | 1.2(3)      |
| C6 | C1 | C2  | C3 | 2.2(3)     | C15 | C16 | N1  | C22 | -0.1(3)     |
| C6 | C1 | C10 | C9 | 1.0(3)     | C15 | C16 | N1  | C23 | 175.9(2)    |

**Table 6 Torsion Angles for 3a.**

| A  | B   | C   | D   | Angle/°     | A   | B   | C   | D   | Angle/°     |
|----|-----|-----|-----|-------------|-----|-----|-----|-----|-------------|
| C6 | C1  | C10 | O1  | -179.61(18) | C15 | C17 | C18 | C19 | -179.6(2)   |
| C6 | C7  | C8  | C9  | 1.2(3)      | C15 | C17 | C22 | C21 | 179.3(2)    |
| C6 | C7  | C8  | C11 | 176.3(2)    | C15 | C17 | C22 | N1  | 0.7(2)      |
| C6 | C7  | O2  | C12 | 172.5(2)    | C16 | C15 | C17 | C18 | 179.6(2)    |
| C7 | C8  | C9  | C10 | -1.1(3)     | C16 | C15 | C17 | C22 | -0.7(2)     |
| C7 | C8  | C9  | C15 | 178.3(2)    | C17 | C15 | C16 | N1  | 0.5(3)      |
| C7 | C8  | C11 | C12 | 11.5(2)     | C17 | C18 | C19 | C20 | -0.4(4)     |
| C7 | C8  | C11 | C13 | -105.8(2)   | C17 | C22 | N1  | C16 | -0.3(3)     |
| C7 | C8  | C11 | C14 | 128.2(2)    | C17 | C22 | N1  | C23 | -176.4(2)   |
| C8 | C7  | O2  | C12 | -8.8(3)     | C18 | C17 | C22 | C21 | -1.0(3)     |
| C8 | C9  | C10 | C1  | 0.0(3)      | C18 | C17 | C22 | N1  | -179.63(19) |
| C8 | C9  | C10 | O1  | -179.32(19) | C18 | C19 | C20 | C21 | 0.0(4)      |
| C8 | C9  | C15 | C16 | 74.0(3)     | C19 | C20 | C21 | C22 | -0.1(4)     |
| C8 | C9  | C15 | C17 | -111.9(3)   | C20 | C21 | C22 | C17 | 0.6(3)      |
| C8 | C11 | C12 | O2  | -16.7(2)    | C20 | C21 | C22 | N1  | 178.9(2)    |
| C9 | C8  | C11 | C12 | -174.3(2)   | C21 | C22 | N1  | C16 | -178.9(2)   |
| C9 | C8  | C11 | C13 | 68.5(3)     | C21 | C22 | N1  | C23 | 5.1(4)      |
| C9 | C8  | C11 | C14 | -57.5(3)    | C22 | C17 | C18 | C19 | 0.8(3)      |
| C9 | C15 | C16 | N1  | 175.5(2)    | O2  | C7  | C8  | C9  | -177.37(18) |
| C9 | C15 | C17 | C18 | 4.5(4)      | O2  | C7  | C8  | C11 | -2.3(3)     |

**Table 7 Hydrogen Atom Coordinates ( $\text{\AA} \times 10^4$ ) and Isotropic Displacement Parameters ( $\text{\AA}^2 \times 10^3$ ) for 3a.**

| Atom | x         | y         | z        | U(eq) |
|------|-----------|-----------|----------|-------|
| H2   | -10936.59 | -13976.53 | -6384.98 | 35    |
| H3   | -11286.59 | -16576.06 | -7565.47 | 42    |
| H4   | -9136.07  | -17281.11 | -7167.56 | 41    |
| H5   | -6615.17  | -15371.67 | -5655.99 | 34    |
| H12A | -2414.82  | -10648.6  | -3514.57 | 52    |
| H12B | -2351.46  | -10944.33 | -2210.14 | 52    |
| H13A | -2556.2   | -8692.83  | -355.29  | 64    |
| H13B | -4134.23  | -10307.18 | -916.36  | 64    |
| H13C | -4297.41  | -8691.89  | -716.81  | 64    |
| H14A | -3174.54  | -7375.42  | -2073    | 57    |
| H14B | -3026.62  | -8442.67  | -3465.21 | 57    |
| H14C | -1667.27  | -7817.43  | -2044.2  | 57    |
| H16  | -5433.97  | -7283.38  | -3632.2  | 34    |
| H18  | -8465.18  | -9930.73  | -1407.96 | 35    |

**Table 7 Hydrogen Atom Coordinates ( $\text{\AA}\times 10^4$ ) and Isotropic Displacement Parameters ( $\text{\AA}^2\times 10^3$ ) for **3a**.**

| Atom | x         | y          | z         | U(eq)   |
|------|-----------|------------|-----------|---------|
| H19  | -9361.9   | -8496.78   | 195.44    | 43      |
| H20  | -8816.33  | -5842.57   | 773.12    | 43      |
| H21  | -7369.39  | -4539.91   | -231.57   | 37      |
| H23A | -6431.38  | -4140.67   | -2314.26  | 50      |
| H23B | -4930.03  | -4398.73   | -2667.23  | 50      |
| H23C | -4842.77  | -3661.72   | -1120.94  | 50      |
| H1   | -9330(50) | -10080(50) | -4170(50) | 116(16) |

Compound **5a** X-Ray crystal diffraction data: Crystals were grown in slow diffusion with EA as clusters of colorless prisms. The ellipsoids are shown at 30% probability levels. Compounds **5a** was collected at 100 K on a Rigaku Oxford Diffraction Supernova Dual Source, Cu at Zero equipped with an AtlasS2 CCD using Cu K $\alpha$  radiation. The data were collected and processed using CrysAlisPro. The structure was solved by direct methods using Olex2 software, and the non-hydrogen atoms were located from the trial structure and then refined anisotropically with SHELXL-2018 using a full-matrix least squares procedure based on  $F^2$ . The weighted  $R$  factor,  $wR$  and goodness-of-fit  $S$  values were obtained based on  $F^2$ . The hydrogen atom positions were fixed geometrically at the calculated distances and allowed to ride on their parent atoms. Crystallographic data for the structure reported in this paper have been deposited at the Cambridge Crystallographic Data Center and allocated with the deposition numbers: CCDC 2079812 for compounds **5a**.

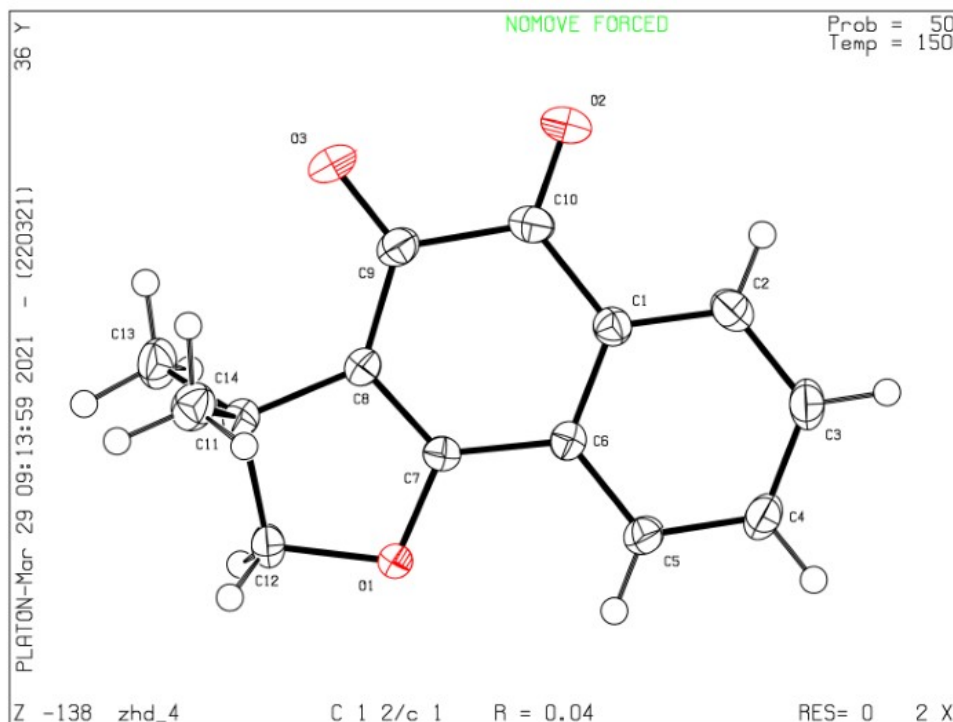

Figure S2. ORTEP Drawing of **5a** (The ellipsoids are shown at 30% probability levels)

**Table 8 Crystal data and structure refinement for 5a.**

|                                             |                                                                |
|---------------------------------------------|----------------------------------------------------------------|
| Identification code                         | 5a                                                             |
| Empirical formula                           | C <sub>14</sub> H <sub>12</sub> O <sub>3</sub>                 |
| Formula weight                              | 228.24                                                         |
| Temperature/K                               | 149.99(10)                                                     |
| Crystal system                              | monoclinic                                                     |
| Space group                                 | C2/c                                                           |
| a/Å                                         | 11.3788(6)                                                     |
| b/Å                                         | 16.9785(9)                                                     |
| c/Å                                         | 11.7105(7)                                                     |
| $\alpha$ /°                                 | 90                                                             |
| $\beta$ /°                                  | 103.517(6)                                                     |
| $\gamma$ /°                                 | 90                                                             |
| Volume/Å <sup>3</sup>                       | 2199.7(2)                                                      |
| Z                                           | 8                                                              |
| $\rho_{\text{calc}}$ /g/cm <sup>3</sup>     | 1.378                                                          |
| $\mu$ /mm <sup>-1</sup>                     | 0.097                                                          |
| F(000)                                      | 960.0                                                          |
| Crystal size/mm <sup>3</sup>                | 0.14 × 0.13 × 0.12                                             |
| Radiation                                   | Mo K $\alpha$ ( $\lambda$ = 0.71073)                           |
| 2 $\Theta$ range for data collection/°      | 4.394 to 49.974                                                |
| Index ranges                                | -13 ≤ h ≤ 11, -20 ≤ k ≤ 20, -13 ≤ l ≤ 13                       |
| Reflections collected                       | 4318                                                           |
| Independent reflections                     | 1938 [ $R_{\text{int}}$ = 0.0157, $R_{\text{sigma}}$ = 0.0219] |
| Data/restraints/parameters                  | 1938/0/157                                                     |
| Goodness-of-fit on F <sup>2</sup>           | 1.014                                                          |
| Final R indexes [ $I \geq 2\sigma(I)$ ]     | $R_1$ = 0.0379, $wR_2$ = 0.1010                                |
| Final R indexes [all data]                  | $R_1$ = 0.0427, $wR_2$ = 0.1052                                |
| Largest diff. peak/hole / e Å <sup>-3</sup> | 0.27/-0.17                                                     |

**Crystal structure determination of [5a]**

**Crystal Data** for C<sub>14</sub>H<sub>12</sub>O<sub>3</sub> ( $M$  = 228.24 g/mol): monoclinic, space group C2/c (no. 15),  $a$  = 11.3788(6) Å,  $b$  = 16.9785(9) Å,  $c$  = 11.7105(7) Å,  $\beta$  = 103.517(6)°,  $V$  = 2199.7(2) Å<sup>3</sup>,  $Z$  = 8,  $T$  = 149.99(10) K,  $\mu$ (Mo K $\alpha$ ) = 0.097 mm<sup>-1</sup>,  $D_{\text{calc}}$  = 1.378 g/cm<sup>3</sup>, 4318 reflections measured (4.394° ≤ 2 $\Theta$  ≤ 49.974°), 1938 unique ( $R_{\text{int}}$  = 0.0157,  $R_{\text{sigma}}$  = 0.0219) which were used in all calculations. The final  $R_1$  was 0.0379 ( $I > 2\sigma(I)$ ) and  $wR_2$  was 0.1052 (all data).

**Table 9 Fractional Atomic Coordinates ( $\times 10^4$ ) and Equivalent Isotropic Displacement Parameters ( $\text{\AA}^2 \times 10^3$ ) for 5a.  $U_{\text{eq}}$  is defined as 1/3 of the trace of the orthogonalised  $U_{ij}$  tensor.**

| Atom | x          | y         | z          | U(eq)   |
|------|------------|-----------|------------|---------|
| O1   | 6015.8(8)  | 4796.8(5) | 3812.3(8)  | 21.3(3) |
| O2   | 7187.1(11) | 1858.8(6) | 2781.3(10) | 41.9(3) |
| O3   | 8302.9(10) | 3129.0(6) | 2078.6(10) | 37.2(3) |
| C1   | 6107.4(11) | 2634.9(8) | 3873.2(11) | 20.9(3) |
| C2   | 5626.8(13) | 1998.9(8) | 4355.4(13) | 28.7(4) |
| C3   | 4860.6(13) | 2115.8(9) | 5097.4(13) | 30.8(4) |
| C4   | 4569.0(13) | 2870.9(9) | 5374.7(13) | 29.7(4) |
| C5   | 5030.0(11) | 3516.7(8) | 4895.2(11) | 23.8(3) |
| C6   | 5795.0(11) | 3402.2(8) | 4143.4(11) | 18.5(3) |
| C7   | 6332.1(11) | 4051.1(7) | 3628.0(10) | 17.2(3) |
| C8   | 7174.6(11) | 3989.3(7) | 2989.6(11) | 19.1(3) |
| C9   | 7558.3(12) | 3235.2(8) | 2661.9(12) | 23.7(3) |
| C10  | 6953.8(12) | 2507.0(8) | 3089.7(12) | 25.4(3) |
| C11  | 7608.0(11) | 4802.1(8) | 2747.1(11) | 20.7(3) |
| C12  | 6672.0(12) | 5311.9(8) | 3163.2(12) | 25.0(3) |
| C13  | 7575.0(14) | 4939.2(8) | 1453.4(12) | 30.4(4) |
| C14  | 8881.8(12) | 4944.6(8) | 3505.0(13) | 29.2(4) |

**Table 10 Anisotropic Displacement Parameters ( $\text{\AA}^2 \times 10^3$ ) for 5a. The Anisotropic displacement factor exponent takes the form:  $-2\pi^2[h^2a^{*2}U_{11}+2hka^*b^*U_{12}+\dots]$ .**

| Atom | $U_{11}$ | $U_{22}$ | $U_{33}$ | $U_{23}$ | $U_{13}$ | $U_{12}$ |
|------|----------|----------|----------|----------|----------|----------|
| O1   | 26.1(5)  | 16.5(5)  | 24.9(5)  | 1.5(4)   | 13.3(4)  | 1.5(4)   |
| O2   | 56.6(8)  | 21.7(6)  | 56.8(8)  | -7.8(5)  | 32.4(6)  | 2.3(5)   |
| O3   | 43.1(7)  | 34.0(6)  | 44.8(7)  | -4.3(5)  | 31.0(5)  | 3.5(5)   |
| C1   | 20.4(7)  | 20.2(7)  | 22.1(7)  | 0.1(5)   | 4.7(5)   | -0.3(6)  |
| C2   | 30.0(8)  | 18.9(7)  | 38.6(8)  | 0.1(6)   | 10.7(6)  | 0.2(6)   |
| C3   | 30.6(8)  | 25.9(8)  | 39.2(9)  | 9.7(6)   | 14.5(7)  | -2.5(6)  |
| C4   | 29.5(8)  | 31.7(8)  | 32.9(8)  | 7.8(6)   | 17.5(6)  | 2.7(6)   |
| C5   | 25.0(7)  | 23.0(7)  | 26.2(7)  | 3.8(6)   | 11.4(6)  | 4.7(6)   |
| C6   | 17.1(6)  | 20.7(7)  | 17.1(6)  | 1.9(5)   | 3.1(5)   | 0.1(5)   |
| C7   | 17.8(6)  | 17.4(7)  | 15.7(6)  | -0.5(5)  | 2.7(5)   | 1.3(5)   |
| C8   | 18.7(6)  | 21.4(7)  | 17.6(6)  | 0.2(5)   | 5.2(5)   | -0.3(5)  |
| C9   | 23.8(7)  | 26.4(7)  | 22.8(7)  | -2.1(6)  | 9.2(5)   | 0.6(6)   |
| C10  | 27.8(7)  | 21.1(7)  | 27.9(7)  | -3.5(6)  | 7.8(6)   | 2.9(6)   |
| C11  | 21.9(7)  | 21.4(7)  | 20.1(7)  | 0.2(5)   | 7.5(5)   | -1.2(5)  |
| C12  | 26.2(7)  | 20.1(7)  | 31.5(8)  | 5.3(6)   | 12.4(6)  | -1.7(6)  |
| C13  | 40.6(9)  | 29.9(8)  | 22.9(8)  | 1.8(6)   | 11.9(6)  | -7.5(7)  |

**Table 10 Anisotropic Displacement Parameters ( $\text{\AA}^2 \times 10^3$ ) for 5a. The Anisotropic displacement factor exponent takes the form:  $-2\pi^2[h^2a^{*2}U_{11}+2hka^*b^*U_{12}+\dots]$ .**

| Atom | $U_{11}$ | $U_{22}$ | $U_{33}$ | $U_{23}$ | $U_{13}$ | $U_{12}$ |
|------|----------|----------|----------|----------|----------|----------|
| C14  | 24.5(7)  | 33.2(8)  | 30.7(8)  | -1.7(6)  | 7.8(6)   | -4.6(6)  |

**Table 11 Bond Lengths for 5a.**

| Atom | Atom | Length/ $\text{\AA}$ | Atom | Atom | Length/ $\text{\AA}$ |
|------|------|----------------------|------|------|----------------------|
| O1   | C7   | 1.3473(15)           | C5   | C6   | 1.3888(18)           |
| O1   | C12  | 1.4715(16)           | C6   | C7   | 1.4573(18)           |
| O2   | C10  | 1.2071(16)           | C7   | C8   | 1.3506(18)           |
| O3   | C9   | 1.2196(17)           | C8   | C9   | 1.4337(18)           |
| C1   | C2   | 1.3887(19)           | C8   | C11  | 1.5145(17)           |
| C1   | C6   | 1.4059(18)           | C9   | C10  | 1.5538(19)           |
| C1   | C10  | 1.4931(18)           | C11  | C12  | 1.5375(19)           |
| C2   | C3   | 1.382(2)             | C11  | C13  | 1.5245(19)           |
| C3   | C4   | 1.382(2)             | C11  | C14  | 1.5316(19)           |
| C4   | C5   | 1.389(2)             |      |      |                      |

**Table 12 Bond Angles for 5a.**

| Atom | Atom | Atom | Angle/ $^\circ$ | Atom | Atom | Atom | Angle/ $^\circ$ |
|------|------|------|-----------------|------|------|------|-----------------|
| C7   | O1   | C12  | 106.79(9)       | C7   | C8   | C11  | 109.72(11)      |
| C2   | C1   | C6   | 119.00(12)      | C9   | C8   | C11  | 129.09(12)      |
| C2   | C1   | C10  | 120.58(12)      | O3   | C9   | C8   | 125.23(13)      |
| C6   | C1   | C10  | 120.42(12)      | O3   | C9   | C10  | 118.74(12)      |
| C3   | C2   | C1   | 120.69(13)      | C8   | C9   | C10  | 116.03(11)      |
| C4   | C3   | C2   | 120.17(13)      | O2   | C10  | C1   | 122.34(13)      |
| C3   | C4   | C5   | 120.20(13)      | O2   | C10  | C9   | 118.96(13)      |
| C6   | C5   | C4   | 119.84(13)      | C1   | C10  | C9   | 118.70(11)      |
| C1   | C6   | C7   | 117.05(12)      | C8   | C11  | C12  | 99.99(10)       |
| C5   | C6   | C1   | 120.08(12)      | C8   | C11  | C13  | 113.08(11)      |
| C5   | C6   | C7   | 122.85(12)      | C8   | C11  | C14  | 109.92(11)      |
| O1   | C7   | C6   | 119.37(11)      | C13  | C11  | C12  | 111.78(11)      |
| O1   | C7   | C8   | 114.36(11)      | C13  | C11  | C14  | 110.61(11)      |
| C8   | C7   | C6   | 126.23(11)      | C14  | C11  | C12  | 111.06(11)      |
| C7   | C8   | C9   | 121.17(12)      | O1   | C12  | C11  | 107.57(10)      |

**Table 13 Torsion Angles for 5a.**

| A  | B  | C   | D   | Angle/ $^\circ$ | A  | B  | C   | D   | Angle/ $^\circ$ |
|----|----|-----|-----|-----------------|----|----|-----|-----|-----------------|
| O1 | C7 | C8  | C9  | -176.50(10)     | C7 | O1 | C12 | C11 | -10.36(13)      |
| O1 | C7 | C8  | C11 | 4.89(15)        | C7 | C8 | C9  | O3  | 179.23(13)      |
| O3 | C9 | C10 | O2  | -4.0(2)         | C7 | C8 | C9  | C10 | -0.31(19)       |

**Table 13 Torsion Angles for 5a.**

| A  | B  | C   | D   | Angle/°     | A   | B   | C   | D   | Angle/°     |
|----|----|-----|-----|-------------|-----|-----|-----|-----|-------------|
| O3 | C9 | C10 | C1  | 175.78(12)  | C7  | C8  | C11 | C12 | -10.45(13)  |
| C1 | C2 | C3  | C4  | -0.4(2)     | C7  | C8  | C11 | C13 | -129.44(12) |
| C1 | C6 | C7  | O1  | 176.74(10)  | C7  | C8  | C11 | C14 | 106.41(12)  |
| C1 | C6 | C7  | C8  | -5.55(19)   | C8  | C9  | C10 | O2  | 175.60(13)  |
| C2 | C1 | C6  | C5  | 0.89(19)    | C8  | C9  | C10 | C1  | -4.65(18)   |
| C2 | C1 | C6  | C7  | 179.31(11)  | C8  | C11 | C12 | O1  | 12.24(12)   |
| C2 | C1 | C10 | O2  | 5.2(2)      | C9  | C8  | C11 | C12 | 171.09(13)  |
| C2 | C1 | C10 | C9  | -174.56(12) | C9  | C8  | C11 | C13 | 52.10(18)   |
| C2 | C3 | C4  | C5  | 1.0(2)      | C9  | C8  | C11 | C14 | -72.05(16)  |
| C3 | C4 | C5  | C6  | -0.6(2)     | C10 | C1  | C2  | C3  | 178.83(13)  |
| C4 | C5 | C6  | C1  | -0.35(19)   | C10 | C1  | C6  | C5  | -178.46(11) |
| C4 | C5 | C6  | C7  | -178.67(12) | C10 | C1  | C6  | C7  | -0.04(18)   |
| C5 | C6 | C7  | O1  | -4.88(18)   | C11 | C8  | C9  | O3  | -2.5(2)     |
| C5 | C6 | C7  | C8  | 172.82(12)  | C11 | C8  | C9  | C10 | 178.00(11)  |
| C6 | C1 | C2  | C3  | -0.5(2)     | C12 | O1  | C7  | C6  | -178.45(10) |
| C6 | C1 | C10 | O2  | -175.47(13) | C12 | O1  | C7  | C8  | 3.58(14)    |
| C6 | C1 | C10 | C9  | 4.78(19)    | C13 | C11 | C12 | O1  | 132.18(11)  |
| C6 | C7 | C8  | C9  | 5.7(2)      | C14 | C11 | C12 | O1  | -103.77(12) |
| C6 | C7 | C8  | C11 | -172.92(11) |     |     |     |     |             |

**Table 14 Hydrogen Atom Coordinates ( $\text{\AA} \times 10^4$ ) and Isotropic Displacement Parameters ( $\text{\AA}^2 \times 10^3$ ) for 5a.**

| Atom | x       | y       | z       | U(eq) |
|------|---------|---------|---------|-------|
| H2   | 5822.7  | 1488.87 | 4176.98 | 34    |
| H3   | 4540.23 | 1685.17 | 5411.04 | 37    |
| H4   | 4062.54 | 2947.01 | 5883.82 | 36    |
| H5   | 4826.88 | 4024.33 | 5077.22 | 29    |
| H12A | 7073.1  | 5732    | 3668.43 | 30    |
| H12B | 6114.54 | 5545.69 | 2494.57 | 30    |
| H13A | 8140.09 | 4592.81 | 1214.57 | 46    |
| H13B | 7788.2  | 5475.87 | 1340.58 | 46    |
| H13C | 6775.82 | 4835.2  | 990.31  | 46    |
| H14A | 8873.44 | 4892.6  | 4319.37 | 44    |
| H14B | 9142.34 | 5465.54 | 3361.85 | 44    |
| H14C | 9428.19 | 4564.86 | 3308.87 | 44    |

Compound **6a** X-Ray crystal diffraction data: Crystals were grown in slow diffusion with EA as clusters of colorless prisms. The ellipsoids are shown at 30% probability levels. Compounds **6a** was collected at 100 K on a Rigaku Oxford Diffraction

Supernova Dual Source, Cu at Zero equipped with an AtlasS2 CCD using Cu K $\alpha$  radiation. The data were collected and processed using CrysAlisPro. The structure was solved by direct methods using Olex2 software, and the non-hydrogen atoms were located from the trial structure and then refined anisotropically with SHELXL-2018 using a full-matrix least squares procedure based on  $F^2$ . The weighted  $R$  factor,  $wR$  and goodness-of-fit  $S$  values were obtained based on  $F^2$ . The hydrogen atom positions were fixed geometrically at the calculated distances and allowed to ride on their parent atoms. Crystallographic data for the structure reported in this paper have been deposited at the Cambridge Crystallographic Data Center and allocated with the deposition numbers: CCDC 2079813 for compounds **6a**.

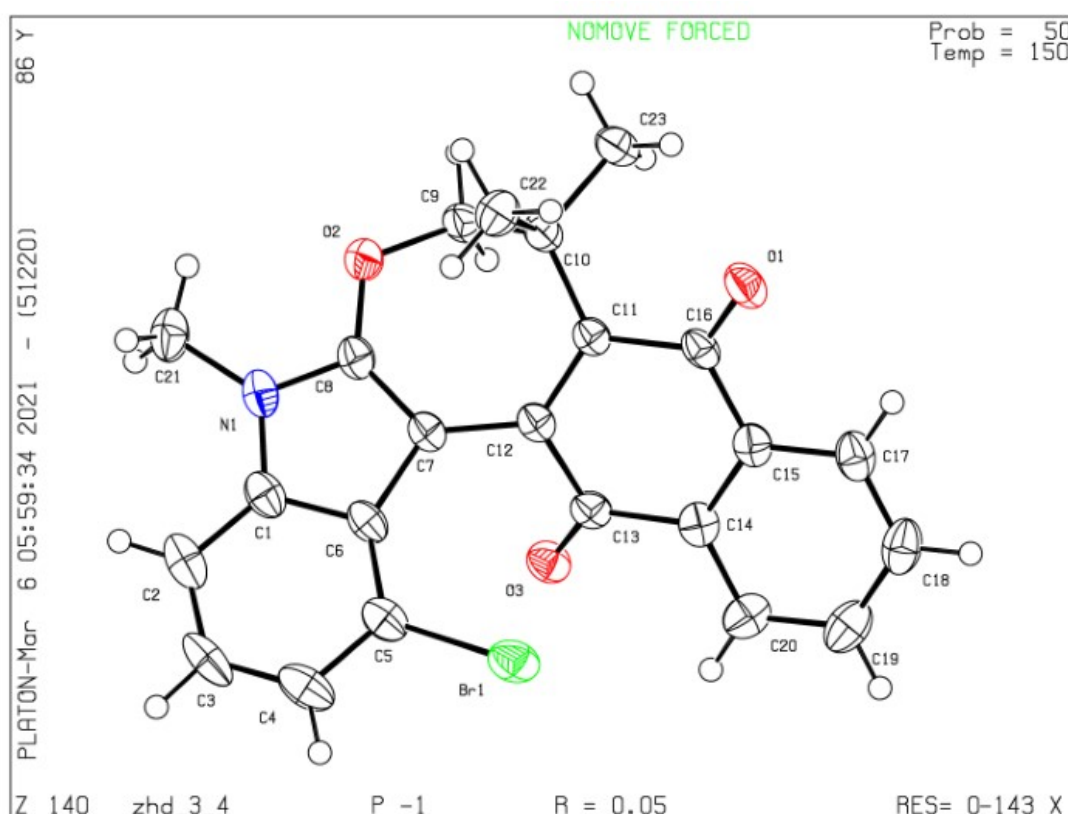

Figure S3. ORTEP Drawing of **6a** (The ellipsoids are shown at 30% probability levels)

**Table 15 Crystal data and structure refinement for 6a.**

|                     |                                                   |
|---------------------|---------------------------------------------------|
| Identification code | 6a                                                |
| Empirical formula   | C <sub>23</sub> H <sub>18</sub> BrNO <sub>3</sub> |
| Formula weight      | 436.29                                            |
| Temperature/K       | 149.99(10)                                        |
| Crystal system      | triclinic                                         |
| Space group         | P-1                                               |
| a/Å                 | 7.5489(4)                                         |
| b/Å                 | 9.1816(6)                                         |
| c/Å                 | 13.9165(8)                                        |
| $\alpha$ /°         | 89.982(5)                                         |



|                                               |                                                               |
|-----------------------------------------------|---------------------------------------------------------------|
| $\beta/^\circ$                                | 85.879(4)                                                     |
| $\gamma/^\circ$                               | 71.987(5)                                                     |
| Volume/ $\text{\AA}^3$                        | 914.67(10)                                                    |
| Z                                             | 2                                                             |
| $\rho_{\text{calc}}/\text{g/cm}^3$            | 1.584                                                         |
| $\mu/\text{mm}^{-1}$                          | 3.272                                                         |
| F(000)                                        | 444.0                                                         |
| Crystal size/ $\text{mm}^3$                   | $0.13 \times 0.11 \times 0.09$                                |
| Radiation                                     | Cu K $\alpha$ ( $\lambda = 1.54184$ )                         |
| $2\Theta$ range for data collection/ $^\circ$ | 6.37 to 133.202                                               |
| Index ranges                                  | $-8 \leq h \leq 7, -10 \leq k \leq 9, -16 \leq l \leq 16$     |
| Reflections collected                         | 5619                                                          |
| Independent reflections                       | 3214 [ $R_{\text{int}} = 0.0585, R_{\text{sigma}} = 0.0488$ ] |
| Data/restraints/parameters                    | 3214/0/256                                                    |
| Goodness-of-fit on $F^2$                      | 1.075                                                         |
| Final R indexes [ $I \geq 2\sigma(I)$ ]       | $R_1 = 0.0480, wR_2 = 0.1318$                                 |
| Final R indexes [all data]                    | $R_1 = 0.0518, wR_2 = 0.1356$                                 |
| Largest diff. peak/hole / $e \text{\AA}^{-3}$ | 0.64/-1.03                                                    |

### Crystal structure determination of [6a]

**Crystal Data** for  $\text{C}_{23}\text{H}_{18}\text{BrNO}_3$  ( $M = 436.29$  g/mol): triclinic, space group P-1 (no. 2),  $a = 7.5489(4)$   $\text{\AA}$ ,  $b = 9.1816(6)$   $\text{\AA}$ ,  $c = 13.9165(8)$   $\text{\AA}$ ,  $\alpha = 89.982(5)^\circ$ ,  $\beta = 85.879(4)^\circ$ ,  $\gamma = 71.987(5)^\circ$ ,  $V = 914.67(10)$   $\text{\AA}^3$ ,  $Z = 2$ ,  $T = 149.99(10)$  K,  $\mu(\text{Cu K}\alpha) = 3.272$   $\text{mm}^{-1}$ ,  $D_{\text{calc}} = 1.584$   $\text{g/cm}^3$ , 5619 reflections measured ( $6.37^\circ \leq 2\Theta \leq 133.202^\circ$ ), 3214 unique ( $R_{\text{int}} = 0.0585$ ,  $R_{\text{sigma}} = 0.0488$ ) which were used in all calculations. The final  $R_1$  was 0.0480 ( $I > 2\sigma(I)$ ) and  $wR_2$  was 0.1356 (all data).

**Table 16 Fractional Atomic Coordinates ( $\times 10^4$ ) and Equivalent Isotropic Displacement Parameters ( $\text{\AA}^2 \times 10^3$ ) for 6a.  $U_{\text{eq}}$  is defined as 1/3 of the trace of the orthogonalised  $U_{\text{IJ}}$  tensor.**

| Atom | x          | y         | z          | $U(\text{eq})$ |
|------|------------|-----------|------------|----------------|
| Br1  | 10215.9(5) | 2382.4(4) | 7483.2(3)  | 40.28(18)      |
| O1   | 7670(4)    | 7830(3)   | 5132.6(17) | 37.0(6)        |
| O2   | 5063(4)    | 8518(3)   | 8843.4(16) | 34.8(6)        |
| O3   | 5829(3)    | 3699(3)   | 7239.0(17) | 32.4(5)        |
| N1   | 6285(4)    | 6606(4)   | 9868.7(19) | 33.0(7)        |
| C1   | 7333(5)    | 5087(4)   | 9849(2)    | 32.3(7)        |
| C2   | 7911(6)    | 4165(5)   | 10631(3)   | 41.4(9)        |
| C3   | 9033(6)    | 2678(5)   | 10439(3)   | 45.7(10)       |
| C4   | 9640(5)    | 2170(5)   | 9495(3)    | 43.2(9)        |
| C5   | 9047(5)    | 3112(4)   | 8724(3)    | 34.7(8)        |
| C6   | 7785(4)    | 4584(4)   | 8875(2)    | 27.9(7)        |

**Table 16 Fractional Atomic Coordinates ( $\times 10^4$ ) and Equivalent Isotropic Displacement Parameters ( $\text{\AA}^2 \times 10^3$ ) for 6a.  $U_{\text{eq}}$  is defined as 1/3 of the trace of the orthogonalised  $U_{ij}$  tensor.**

| Atom | x       | y        | z        | U(eq)   |
|------|---------|----------|----------|---------|
| C7   | 6863(5) | 5875(4)  | 8285(2)  | 27.4(7) |
| C8   | 6041(5) | 7055(4)  | 8944(2)  | 29.8(7) |
| C9   | 4457(5) | 8955(4)  | 7897(2)  | 31.0(7) |
| C10  | 6032(5) | 8791(4)  | 7087(2)  | 29.0(7) |
| C11  | 6627(4) | 7162(4)  | 6665(2)  | 24.9(6) |
| C12  | 6811(4) | 5901(4)  | 7239(2)  | 25.1(6) |
| C13  | 6605(4) | 4490(4)  | 6777(2)  | 26.2(7) |
| C14  | 7179(4) | 4177(4)  | 5739(2)  | 29.2(7) |
| C15  | 7408(4) | 5355(4)  | 5172(2)  | 28.5(7) |
| C16  | 7202(4) | 6881(4)  | 5615(2)  | 27.2(7) |
| C17  | 7862(5) | 5100(5)  | 4183(2)  | 34.7(8) |
| C18  | 8122(5) | 3667(5)  | 3785(3)  | 40.0(9) |
| C19  | 7955(5) | 2483(5)  | 4353(3)  | 41.6(9) |
| C20  | 7452(5) | 2727(4)  | 5329(3)  | 36.0(8) |
| C21  | 5545(6) | 7571(5)  | 10724(2) | 40.5(9) |
| C22  | 7674(5) | 9199(4)  | 7451(3)  | 36.3(8) |
| C23  | 5038(5) | 10002(4) | 6362(3)  | 35.0(8) |

**Table 17 Anisotropic Displacement Parameters ( $\text{\AA}^2 \times 10^3$ ) for 6a. The Anisotropic displacement factor exponent takes the form:  $-2\pi^2[h^2a^{*2}U_{11}+2hka^*b^*U_{12}+\dots]$ .**

| Atom | $U_{11}$ | $U_{22}$ | $U_{33}$ | $U_{23}$ | $U_{13}$  | $U_{12}$  |
|------|----------|----------|----------|----------|-----------|-----------|
| Br1  | 29.8(2)  | 34.6(3)  | 48.5(3)  | 7.28(17) | 0.36(16)  | 0.71(17)  |
| O1   | 38.8(14) | 39.3(14) | 30.5(12) | 11.3(10) | 0.6(10)   | -9.3(12)  |
| O2   | 39.8(14) | 32.5(13) | 26.8(12) | 0.6(10)  | 2.7(10)   | -4.4(11)  |
| O3   | 31.0(13) | 32.4(13) | 34.3(12) | 5.5(10)  | 0.6(10)   | -11.3(11) |
| N1   | 35.4(16) | 42.7(18) | 23.2(13) | 5.0(12)  | -1.7(11)  | -15.6(14) |
| C1   | 29.8(17) | 41(2)    | 30.7(17) | 10.0(14) | -5.9(13)  | -16.9(16) |
| C2   | 41(2)    | 58(3)    | 33.1(18) | 17.7(17) | -11.3(15) | -25.0(19) |
| C3   | 44(2)    | 56(3)    | 44(2)    | 31.1(19) | -20.0(17) | -22(2)    |
| C4   | 30.8(19) | 43(2)    | 57(2)    | 21.8(18) | -13.0(17) | -11.0(17) |
| C5   | 30.4(18) | 36.4(19) | 38.7(19) | 11.1(15) | -7.5(14)  | -11.4(15) |
| C6   | 22.4(15) | 34.3(18) | 29.1(16) | 10.3(13) | -6.0(12)  | -10.7(14) |
| C7   | 27.3(16) | 29.2(17) | 25.8(16) | 5.6(13)  | -2.2(12)  | -9.1(14)  |
| C8   | 30.3(17) | 34.5(19) | 25.1(16) | 4.2(13)  | 0.0(13)   | -11.1(15) |
| C9   | 27.1(17) | 29.4(17) | 30.0(17) | 4.3(13)  | -0.9(13)  | 0.6(14)   |
| C10  | 29.6(17) | 28.0(17) | 27.0(16) | 5.4(13)  | -0.9(13)  | -5.8(14)  |
| C11  | 20.7(15) | 27.3(16) | 25.9(16) | 3.4(12)  | -2.6(12)  | -5.9(13)  |

**Table 17 Anisotropic Displacement Parameters ( $\text{\AA}^2 \times 10^3$ ) for 6a. The Anisotropic displacement factor exponent takes the form:  $-2\pi^2[h^2a^{*2}U_{11}+2hka^*b^*U_{12}+\dots]$ .**

| Atom | $U_{11}$ | $U_{22}$ | $U_{33}$ | $U_{23}$  | $U_{13}$ | $U_{12}$  |
|------|----------|----------|----------|-----------|----------|-----------|
| C12  | 17.9(14) | 29.1(17) | 26.5(15) | 4.4(12)   | -1.4(11) | -4.5(13)  |
| C13  | 17.2(14) | 26.6(16) | 31.2(16) | 3.1(13)   | -2.4(12) | -1.1(12)  |
| C14  | 21.3(15) | 37.1(19) | 29.6(16) | 1.8(14)   | -0.7(12) | -9.9(14)  |
| C15  | 19.1(14) | 36.2(18) | 27.1(16) | 2.4(13)   | -2.6(12) | -3.7(14)  |
| C16  | 20.9(15) | 31.3(18) | 26.6(16) | 8.3(13)   | -3.9(12) | -3.7(13)  |
| C17  | 26.2(17) | 47(2)    | 28.2(17) | 4.0(15)   | 0.3(13)  | -7.9(16)  |
| C18  | 29.0(18) | 58(2)    | 29.7(17) | -7.6(16)  | 0.4(14)  | -9.8(17)  |
| C19  | 32.9(19) | 48(2)    | 44(2)    | -14.5(18) | 4.2(16)  | -15.4(18) |
| C20  | 31.2(18) | 35.7(19) | 42(2)    | -6.0(15)  | 3.8(15)  | -12.7(16) |
| C21  | 47(2)    | 52(2)    | 26.0(17) | -1.9(16)  | 3.9(15)  | -23.1(19) |
| C22  | 33.7(19) | 39(2)    | 35.8(18) | -3.4(15)  | -0.1(14) | -11.9(16) |
| C23  | 40(2)    | 29.5(18) | 35.0(18) | 8.7(14)   | -5.6(15) | -9.5(16)  |

**Table 18 Bond Lengths for 6a.**

| Atom | Atom | Length/ $\text{\AA}$ | Atom | Atom | Length/ $\text{\AA}$ |
|------|------|----------------------|------|------|----------------------|
| Br1  | C5   | 1.904(4)             | C7   | C12  | 1.459(4)             |
| O1   | C16  | 1.221(4)             | C9   | C10  | 1.551(4)             |
| O2   | C8   | 1.331(4)             | C10  | C11  | 1.526(5)             |
| O2   | C9   | 1.441(4)             | C10  | C22  | 1.521(5)             |
| O3   | C13  | 1.222(4)             | C10  | C23  | 1.552(4)             |
| N1   | C1   | 1.373(5)             | C11  | C12  | 1.383(4)             |
| N1   | C8   | 1.358(4)             | C11  | C16  | 1.494(4)             |
| N1   | C21  | 1.454(5)             | C12  | C13  | 1.501(5)             |
| C1   | C2   | 1.390(5)             | C13  | C14  | 1.480(4)             |
| C1   | C6   | 1.415(5)             | C14  | C15  | 1.385(5)             |
| C2   | C3   | 1.380(6)             | C14  | C20  | 1.398(5)             |
| C3   | C4   | 1.391(6)             | C15  | C16  | 1.490(5)             |
| C4   | C5   | 1.388(5)             | C15  | C17  | 1.396(5)             |
| C5   | C6   | 1.398(5)             | C17  | C18  | 1.379(6)             |
| C6   | C7   | 1.461(4)             | C18  | C19  | 1.376(6)             |
| C7   | C8   | 1.380(5)             | C19  | C20  | 1.384(5)             |

**Table 19 Bond Angles for 6a.**

| Atom | Atom | Atom | Angle/ $^\circ$ | Atom | Atom | Atom | Angle/ $^\circ$ |
|------|------|------|-----------------|------|------|------|-----------------|
| C8   | O2   | C9   | 116.4(3)        | C22  | C10  | C9   | 111.6(3)        |
| C1   | N1   | C21  | 126.4(3)        | C22  | C10  | C11  | 111.7(3)        |

**Table 19 Bond Angles for 6a.**

| Atom | Atom | Atom | Angle/°  | Atom | Atom | Atom | Angle/°  |
|------|------|------|----------|------|------|------|----------|
| C8   | N1   | C1   | 108.0(3) | C22  | C10  | C23  | 109.9(3) |
| C8   | N1   | C21  | 125.6(3) | C12  | C11  | C10  | 122.1(3) |
| N1   | C1   | C2   | 127.5(3) | C12  | C11  | C16  | 117.8(3) |
| N1   | C1   | C6   | 108.4(3) | C16  | C11  | C10  | 119.9(3) |
| C2   | C1   | C6   | 124.1(4) | C7   | C12  | C13  | 115.6(3) |
| C3   | C2   | C1   | 117.5(4) | C11  | C12  | C7   | 126.3(3) |
| C2   | C3   | C4   | 120.4(3) | C11  | C12  | C13  | 117.2(3) |
| C5   | C4   | C3   | 121.0(4) | O3   | C13  | C12  | 119.6(3) |
| C4   | C5   | Br1  | 116.8(3) | O3   | C13  | C14  | 121.2(3) |
| C4   | C5   | C6   | 120.8(4) | C14  | C13  | C12  | 118.8(3) |
| C6   | C5   | Br1  | 122.0(3) | C15  | C14  | C13  | 118.9(3) |
| C1   | C6   | C7   | 106.9(3) | C15  | C14  | C20  | 120.3(3) |
| C5   | C6   | C1   | 115.7(3) | C20  | C14  | C13  | 120.8(3) |
| C5   | C6   | C7   | 137.2(3) | C14  | C15  | C16  | 120.3(3) |
| C8   | C7   | C6   | 104.1(3) | C14  | C15  | C17  | 119.7(3) |
| C8   | C7   | C12  | 128.1(3) | C17  | C15  | C16  | 120.0(3) |
| C12  | C7   | C6   | 127.8(3) | O1   | C16  | C11  | 121.0(3) |
| O2   | C8   | N1   | 115.2(3) | O1   | C16  | C15  | 119.2(3) |
| O2   | C8   | C7   | 132.3(3) | C15  | C16  | C11  | 119.5(3) |
| N1   | C8   | C7   | 112.4(3) | C18  | C17  | C15  | 119.6(3) |
| O2   | C9   | C10  | 115.9(3) | C19  | C18  | C17  | 120.7(3) |
| C9   | C10  | C23  | 101.9(3) | C18  | C19  | C20  | 120.4(4) |
| C11  | C10  | C9   | 108.8(3) | C19  | C20  | C14  | 119.3(3) |
| C11  | C10  | C23  | 112.5(3) |      |      |      |          |

**Table 20 Hydrogen Bonds for 6a.**

| D   | H    | A  | d(D-H)/Å | d(H-A)/Å | d(D-A)/Å | D-H-A/° |
|-----|------|----|----------|----------|----------|---------|
| C23 | H23A | O1 | 0.96     | 2.21     | 2.813(5) | 120.2   |

**Table 21 Torsion Angles for 6a.**

| A   | B   | C   | D   | Angle/°   | A   | B   | C   | D   | Angle/°   |
|-----|-----|-----|-----|-----------|-----|-----|-----|-----|-----------|
| Br1 | C5  | C6  | C1  | -167.1(2) | C9  | C10 | C11 | C16 | 145.0(3)  |
| Br1 | C5  | C6  | C7  | 6.1(6)    | C10 | C11 | C12 | C7  | -13.5(5)  |
| O2  | C9  | C10 | C11 | 87.0(3)   | C10 | C11 | C12 | C13 | 155.1(3)  |
| O2  | C9  | C10 | C22 | -36.7(4)  | C10 | C11 | C16 | O1  | 19.0(5)   |
| O2  | C9  | C10 | C23 | -153.9(3) | C10 | C11 | C16 | C15 | -167.7(3) |
| O3  | C13 | C14 | C15 | 156.7(3)  | C11 | C12 | C13 | O3  | -142.9(3) |
| O3  | C13 | C14 | C20 | -22.0(5)  | C11 | C12 | C13 | C14 | 31.0(4)   |

**Table 21 Torsion Angles for 6a.**

| A  | B   | C   | D   | Angle/°   | A   | B   | C   | D   | Angle/°   |
|----|-----|-----|-----|-----------|-----|-----|-----|-----|-----------|
| N1 | C1  | C2  | C3  | -177.1(3) | C12 | C7  | C8  | O2  | -3.0(6)   |
| N1 | C1  | C6  | C5  | 172.3(3)  | C12 | C7  | C8  | N1  | 176.5(3)  |
| N1 | C1  | C6  | C7  | -2.9(4)   | C12 | C11 | C16 | O1  | -155.5(3) |
| C1 | N1  | C8  | O2  | -179.2(3) | C12 | C11 | C16 | C15 | 17.8(4)   |
| C1 | N1  | C8  | C7  | 1.2(4)    | C12 | C13 | C14 | C15 | -17.1(4)  |
| C1 | C2  | C3  | C4  | 3.8(5)    | C12 | C13 | C14 | C20 | 164.2(3)  |
| C1 | C6  | C7  | C8  | 3.5(3)    | C13 | C14 | C15 | C16 | 4.0(5)    |
| C1 | C6  | C7  | C12 | -175.9(3) | C13 | C14 | C15 | C17 | -176.9(3) |
| C2 | C1  | C6  | C5  | -6.7(5)   | C13 | C14 | C20 | C19 | 178.8(3)  |
| C2 | C1  | C6  | C7  | 178.1(3)  | C14 | C15 | C16 | O1  | 169.5(3)  |
| C2 | C3  | C4  | C5  | -3.8(6)   | C14 | C15 | C16 | C11 | -3.9(4)   |
| C3 | C4  | C5  | Br1 | 172.3(3)  | C14 | C15 | C17 | C18 | -1.6(5)   |
| C3 | C4  | C5  | C6  | -1.6(6)   | C15 | C14 | C20 | C19 | 0.1(5)    |
| C4 | C5  | C6  | C1  | 6.5(5)    | C15 | C17 | C18 | C19 | -0.5(5)   |
| C4 | C5  | C6  | C7  | 179.8(4)  | C16 | C11 | C12 | C7  | 160.9(3)  |
| C5 | C6  | C7  | C8  | -170.1(4) | C16 | C11 | C12 | C13 | -30.6(4)  |
| C5 | C6  | C7  | C12 | 10.4(6)   | C16 | C15 | C17 | C18 | 177.5(3)  |
| C6 | C1  | C2  | C3  | 1.6(5)    | C17 | C15 | C16 | O1  | -9.5(5)   |
| C6 | C7  | C8  | O2  | 177.6(3)  | C17 | C15 | C16 | C11 | 177.1(3)  |
| C6 | C7  | C8  | N1  | -3.0(4)   | C17 | C18 | C19 | C20 | 2.5(6)    |
| C6 | C7  | C12 | C11 | -152.2(3) | C18 | C19 | C20 | C14 | -2.2(6)   |
| C6 | C7  | C12 | C13 | 39.1(4)   | C20 | C14 | C15 | C16 | -177.2(3) |
| C7 | C12 | C13 | O3  | 26.9(4)   | C20 | C14 | C15 | C17 | 1.8(5)    |
| C7 | C12 | C13 | C14 | -159.2(3) | C21 | N1  | C1  | C2  | -0.4(6)   |
| C8 | O2  | C9  | C10 | -63.3(4)  | C21 | N1  | C1  | C6  | -179.4(3) |
| C8 | N1  | C1  | C2  | -179.9(3) | C21 | N1  | C8  | O2  | 1.3(5)    |
| C8 | N1  | C1  | C6  | 1.2(4)    | C21 | N1  | C8  | C7  | -178.2(3) |
| C8 | C7  | C12 | C11 | 28.4(5)   | C22 | C10 | C11 | C12 | 82.9(4)   |
| C8 | C7  | C12 | C13 | -140.3(3) | C22 | C10 | C11 | C16 | -91.4(3)  |
| C9 | O2  | C8  | N1  | -167.9(3) | C23 | C10 | C11 | C12 | -152.9(3) |
| C9 | O2  | C8  | C7  | 11.6(5)   | C23 | C10 | C11 | C16 | 32.8(4)   |
| C9 | C10 | C11 | C12 | -40.7(4)  |     |     |     |     |           |

**Table 22 Hydrogen Atom Coordinates ( $\text{\AA} \times 10^4$ ) and Isotropic Displacement Parameters ( $\text{\AA}^2 \times 10^3$ ) for 6a.**

| Atom | x       | y       | z        | U(eq) |
|------|---------|---------|----------|-------|
| H2   | 7554.71 | 4535.2  | 11260.59 | 50    |
| H3   | 9385.23 | 2010.88 | 10943.65 | 55    |

**Table 22 Hydrogen Atom Coordinates ( $\text{\AA}\times 10^4$ ) and Isotropic Displacement Parameters ( $\text{\AA}^2\times 10^3$ ) for 6a.**

| Atom | x        | y        | z        | U(eq) |
|------|----------|----------|----------|-------|
| H4   | 10455.82 | 1185.11  | 9377.72  | 52    |
| H9A  | 3668.84  | 10014.34 | 7933.06  | 37    |
| H9B  | 3693.27  | 8336.98  | 7716.55  | 37    |
| H17  | 7987.76  | 5892.64  | 3794.77  | 42    |
| H18  | 8414.54  | 3499.15  | 3125.14  | 48    |
| H19  | 8181.27  | 1512.58  | 4078.41  | 50    |
| H20  | 7296.73  | 1934.8   | 5708.63  | 43    |
| H21A | 4909.77  | 8594.61  | 10536.47 | 61    |
| H21B | 6552.97  | 7581.14  | 11105.13 | 61    |
| H21C | 4685.14  | 7173.13  | 11096.86 | 61    |
| H22A | 8279.33  | 8448.48  | 7901.1   | 54    |
| H22B | 7232.89  | 10190.34 | 7765.04  | 54    |
| H22C | 8547.43  | 9216.37  | 6918.02  | 54    |
| H23A | 5895.78  | 10007.7  | 5819.17  | 53    |
| H23B | 4617.84  | 10996.35 | 6671.95  | 53    |
| H23C | 3985.37  | 9751.58  | 6146.25  | 53    |

## 8. References

1. Y. Dong, H. Zhang, J. Yang, S. He, Z.-C. Shi, X.-M. Zhang and J.-Y. Wang, B(C<sub>6</sub>F<sub>5</sub>)<sub>3</sub>-Catalyzed C–C Coupling of 1,4-Naphthoquinones with the C-3 Position of Indole Derivatives in Water, *ACS Omega.*, 2019, **4**, 21567-21577.
2. H. Kilic, S. Bayindir, E. Erdogan and N. Saracoglu, Synthesis of Highly N-substituted Indole Library via Conjugate Additions of Indoline and Their Synthetic Tool Potentials, *Tetrahedron*, 2012, **68**, 5619-5630.
3. M.-M. Kalt, W. Schuehly, R. Saf, S. Ochensberger, J. Solnier, F. Bucar, M. Kaiser and A. Presser, Palladium-catalysed Synthesis of Arylnaphthoquinones as Antiprotozoal and Antimycobacterial Agents, *Eur J Med Chem.*, **2020**, *207*, 112837.
4. (a) B. M. Loertscher, P. R. Young, P. R. Evans and S. L. Castle, Diastereoselective Synthesis of Vicinal Tertiary Diols, *Org. Lett.*, 2013, **15**, 1930-1933. (b) J. Barluenga, F. J. Fañanás, R. Sanz, C. Marcos, M. Trabada, On the Reactivity of o-Lithioaryl Ethers: Tandem Anion Translocation and Wittig Rearrangement, *Org. Lett.*, 2002, **4**, 1587-1590.

5. W. Gladkowski, A. Skrobiszewski, M. Mazur, M. Siepka, A. Pawlak, B. O. nska-Mrukowicz, A. Bialonska, D. Poradowski, A. Drynda and M. Urbaniak, Synthesis and Anticancer Activity of Novel Halolactones with  $\beta$ -aryl Substituents from Simple Aromatic Aldehydes, *Tetrahedron*, 2013, **69**, 10414-10423.
6. A. Kapat, E. Nyfeler, G. T. Giuffredi and Renaud, P, Intramolecular Schmidt Reaction Involving Primary Azidoalcohols under Nonacidic Conditions: Synthesis of Indolizidine (–)-167B, *J. Am. Chem. Soc.* 2009, **131**, 17746-17747.
7. (a) C. Su and P. G. Williard, Isomerization of Allyl Ethers Initiated by Lithium Diisopropylamide, *Org. Lett.*, 2010, **12**, 5378-5381. (b) L. Bunch, P.-O. Norrby, K. Frydenvang, P. Krogsgaard-Larsen and U. Madsen, Unprecedented Migration of N-Alkoxy carbonyl Groups in Protected Pyroglutaminol, *Org. Lett.*, 2001, **3**, 433-435.
8. (a) J. C. Lo, Y. Yabe and P. S. Baran, A Practical and Catalytic Reductive Olefin Coupling, *J. Am. Chem. Soc.* 2014, **136**, 1304-1307; (b) J. C. Lo, J. Gui, Y. Yabe, C.-M. Pan, Baran, P. S. Functionalized Olefin Cross-coupling to Construct Carbon-carbon Bonds, *Nature* 2014, **516**, 343-348; (c) H. T. Dao, C. Li, Q. Michaudel, B. D. Maxwell and P. S. Baran, Hydromethylation of Unactivated Olefins, *J. Am. Chem. Soc.* 2015, **137**, 8046-8049; (d) J. Gui, C.-M. Pan, Y. Jin, T. Qin, J. C. Lo, B. J. Lee, S. H. Spergel, M. E. Mertzman, W. J. Pitts, T. E. L. Cruz, M. A. Schmidt, N. Darvatkar, S. R. Natarajan and P. S. Baran, Practical Olefin Hydroamination with Nitroarenes, *Science* 2015, **348**, 886-891; (e) J. C. Lo, D. Kim, C.-M. Pan, J. T. Edwards, Y. Yabe, J. Gui, T. Qin, S. Gutiérrez, J. Giacoboni, M. W. Smith, P. L. Holland and P. S. Baran, Fe-Catalyzed C-C Bond Construction from Olefins via Radicals, *J. Am. Chem. Soc.* 2017, **139**, 2484-2503.
9. (a) H. Ishikawa, D. A. Colby and Boger, D. L, Direct Coupling of Catharanthine and Vindoline to Provide Vinblastine: Total Synthesis of (+)- and ent(–)-Vinblastine, *J. Am. Chem. Soc.*, 2008, **130**, 420-421; (b) H. Ishikawa, D. A. Colby, S. Seto, P. Va, A. Tam, H. Kakei, T. J. Rayl, I. Hwang and Boger, D. L, Total Synthesis of Vinblastine, Vincristine, Related Natural Products, and Key Structural Analogues, *J. Am. Chem. Soc.*, 2009, **131**, 4904-4916; (c) T. J. Barker and D. L. Boger, Fe(III)/NaBH<sub>4</sub>-Mediated Free Radical Hydrofluorination of Unactivated Alkenes, *J. Am. Chem. Soc.* 2012, **134**, 13588-13591; (b) E. K. Leggans, T. J. Barker, K. K. Duncan and D. L. Boger, Iron(III)/NaBH<sub>4</sub>-Mediated Additions to Unactivated Alkenes: Synthesis of Novel 20'-Vinblastine Analogues, *Org. Lett.* 2012, **14**, 1428-1431.

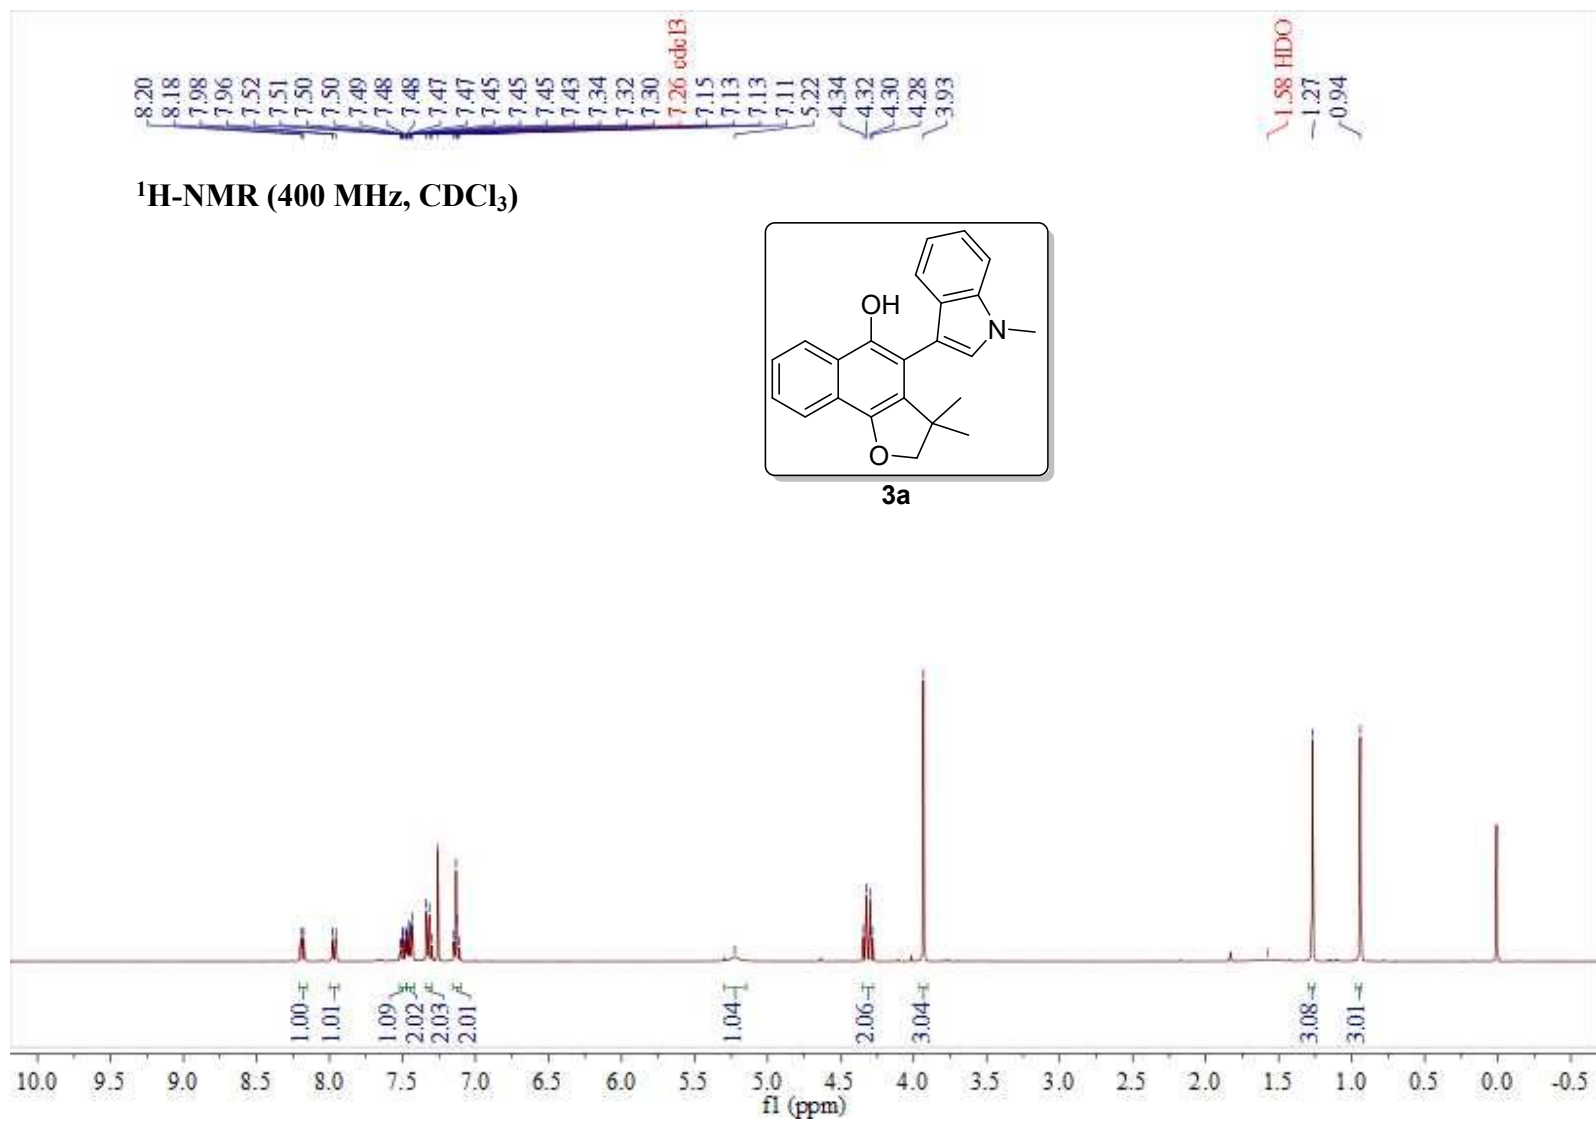



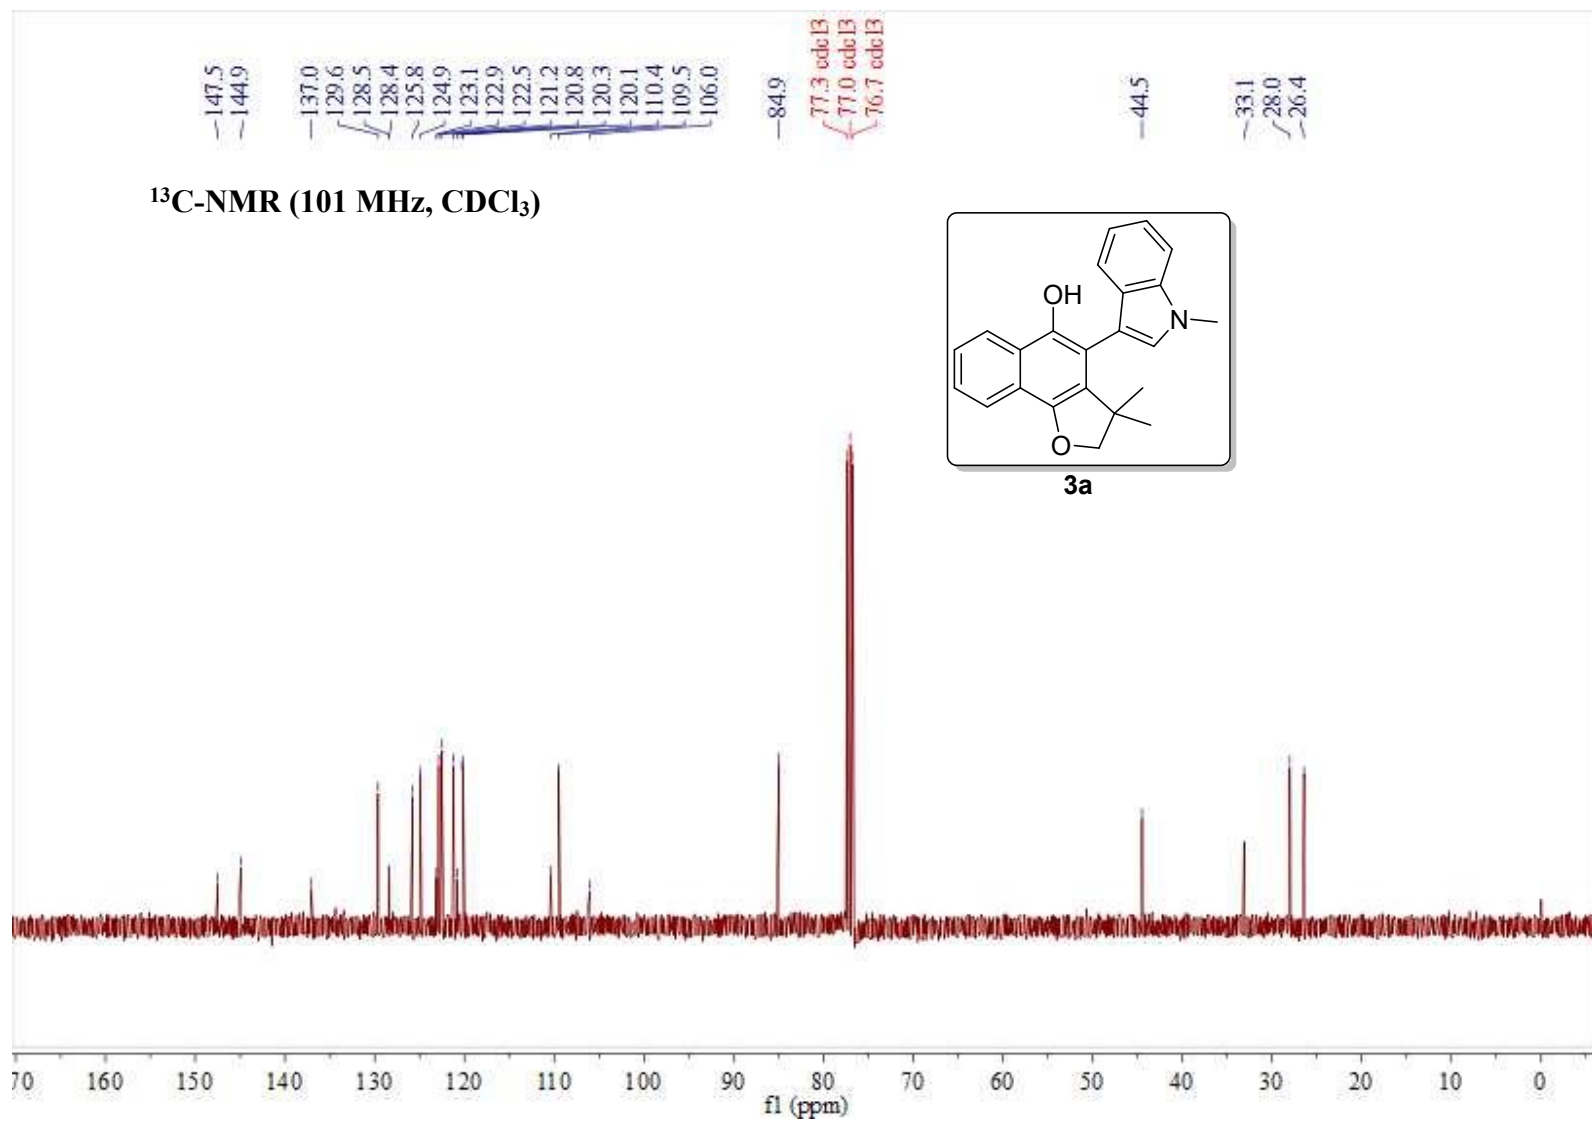

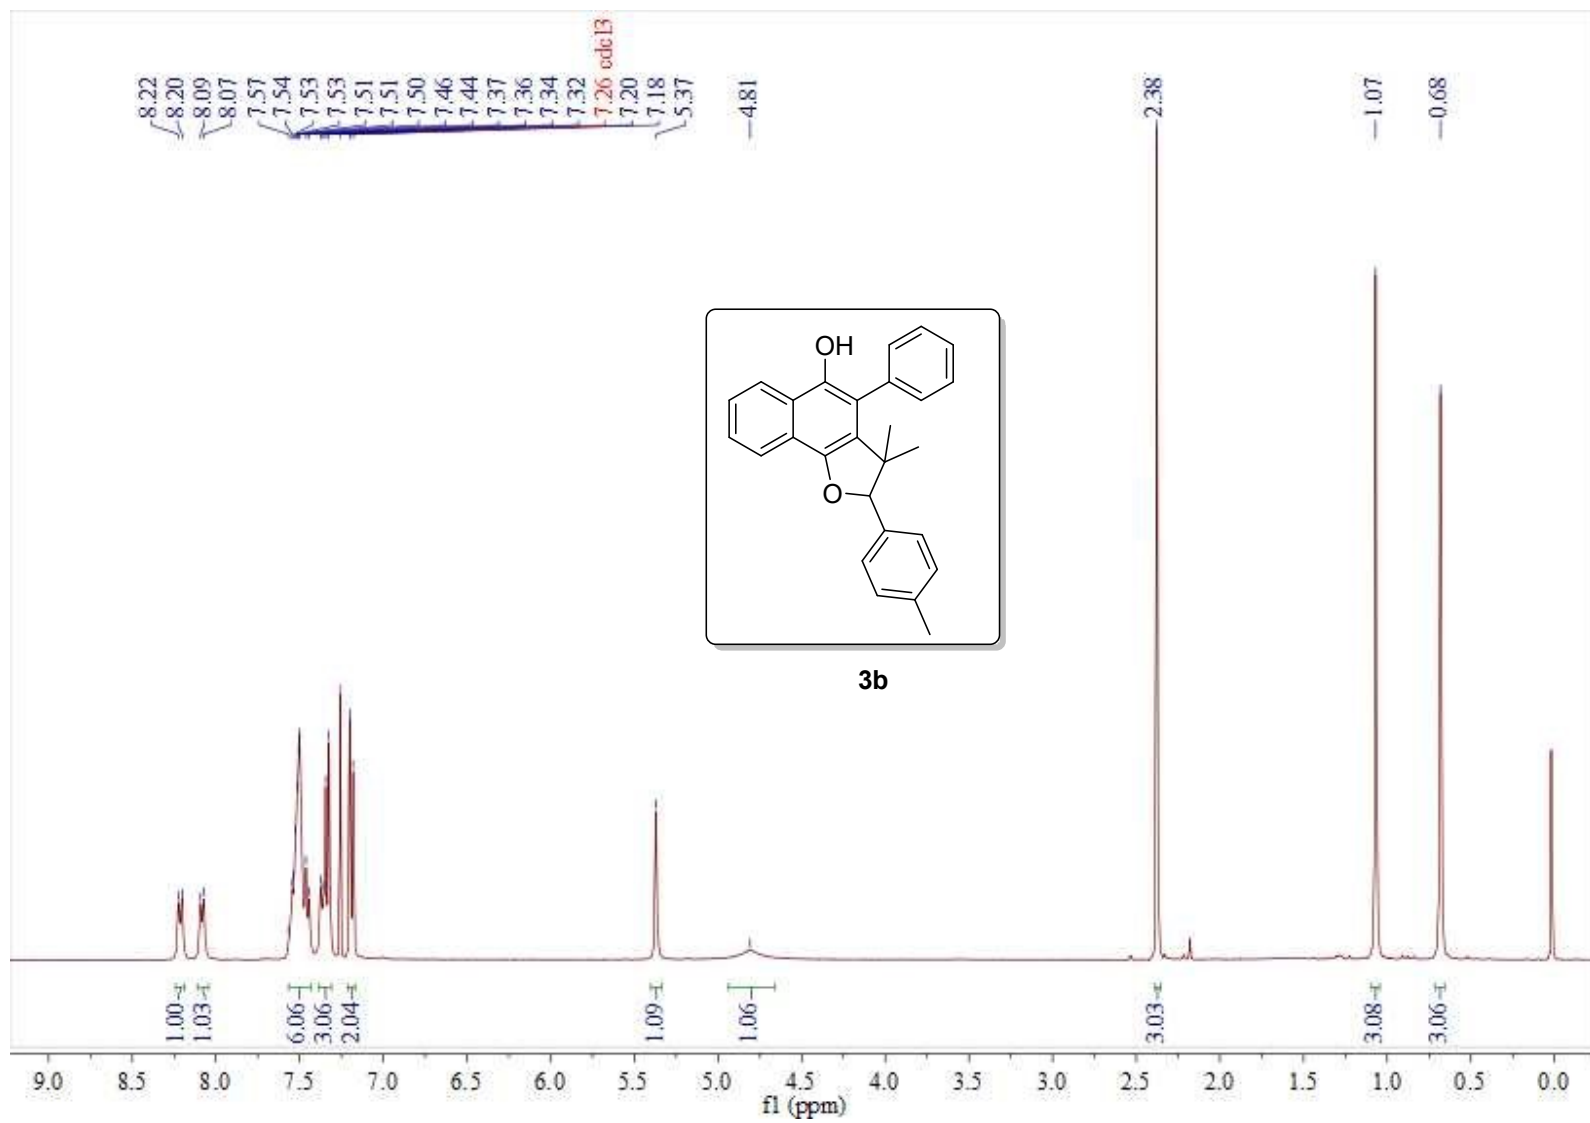

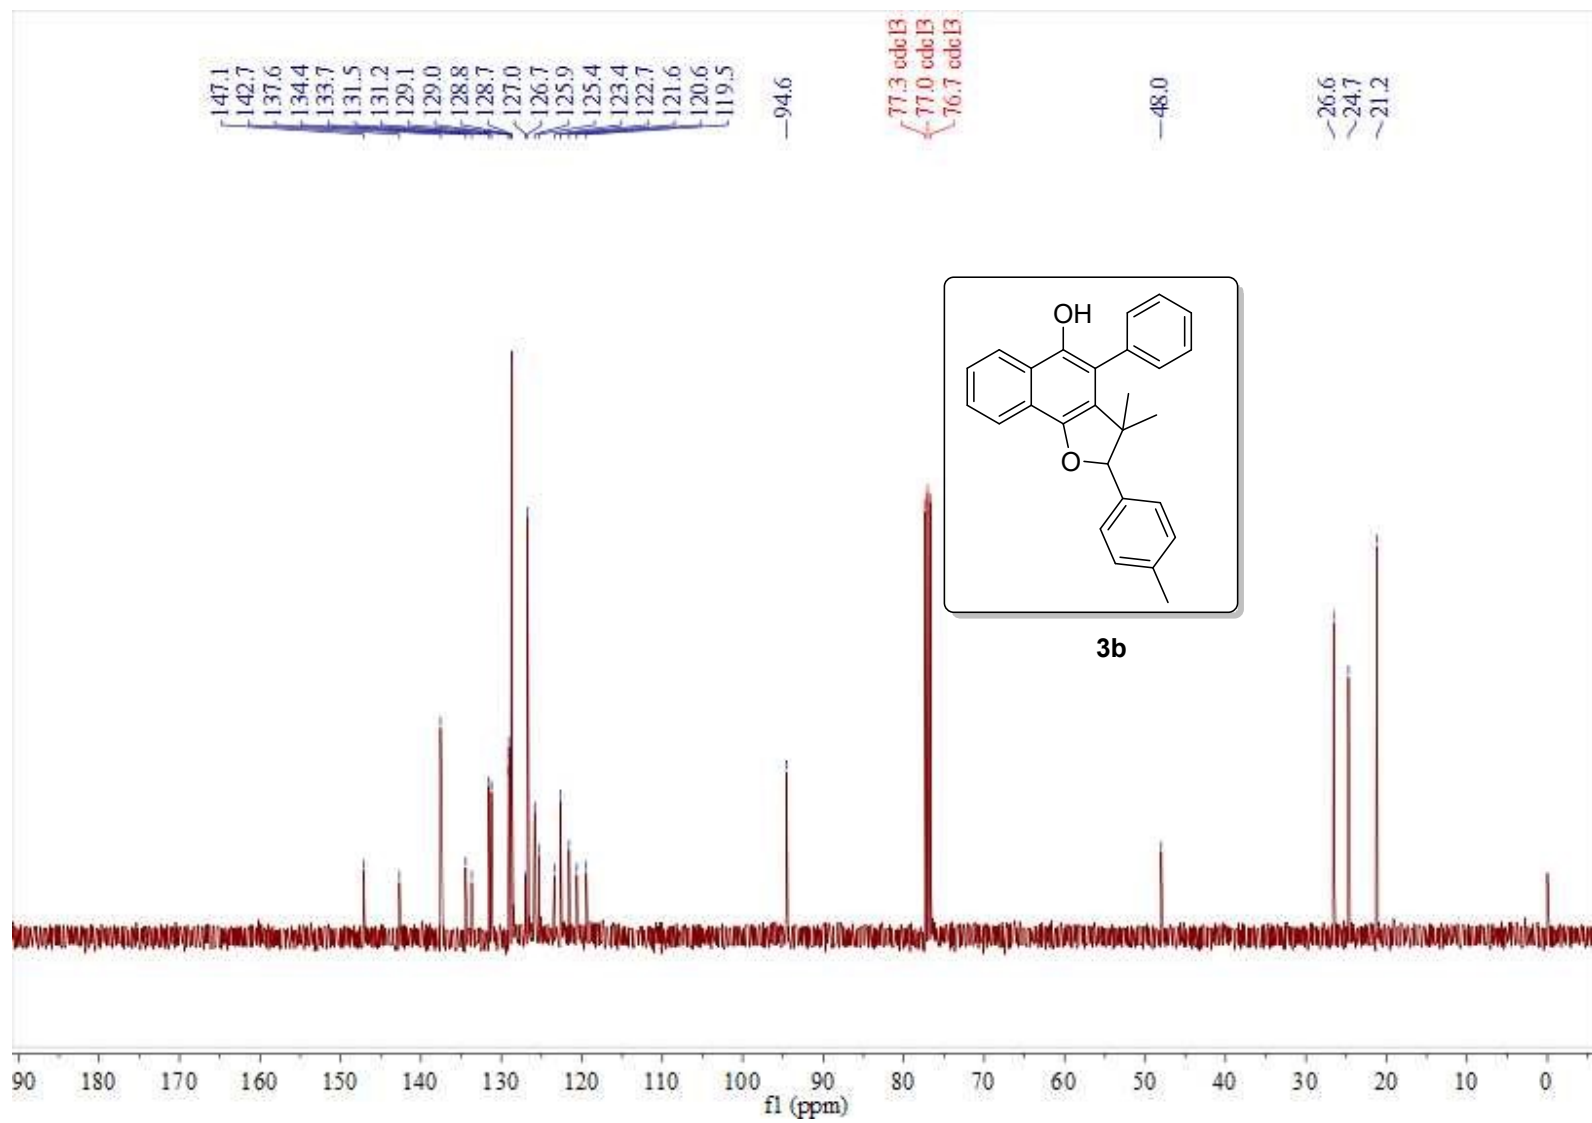

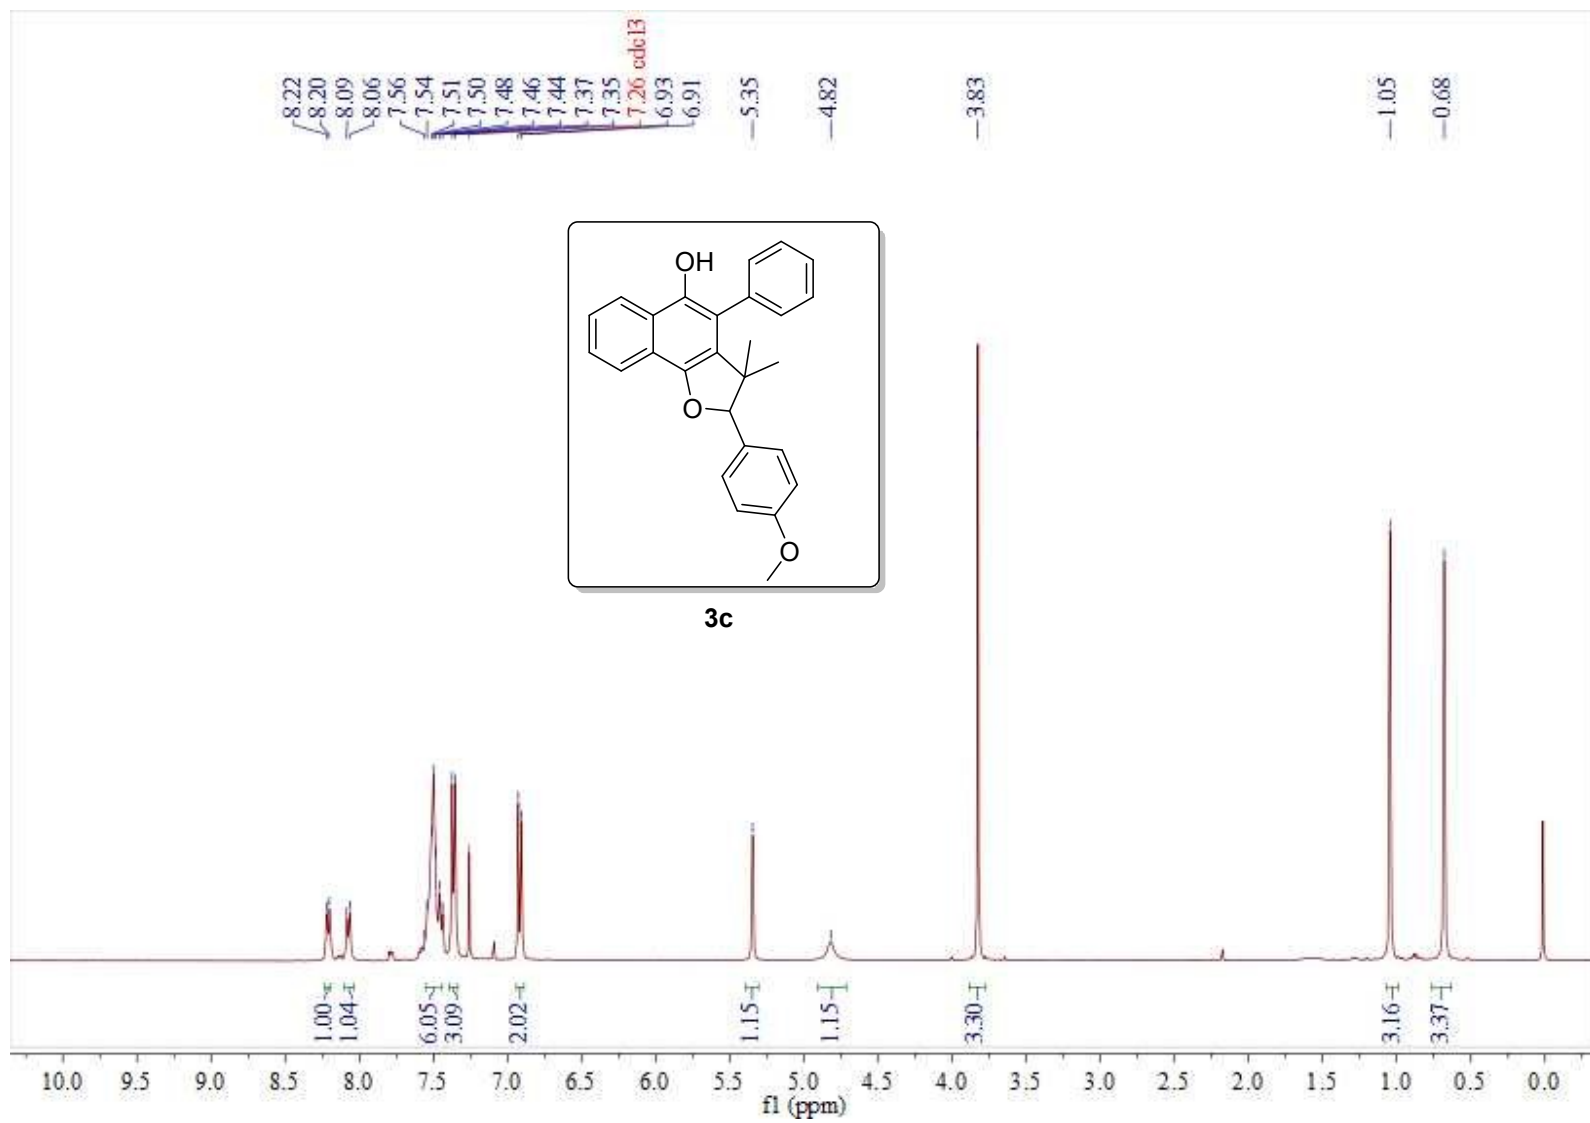

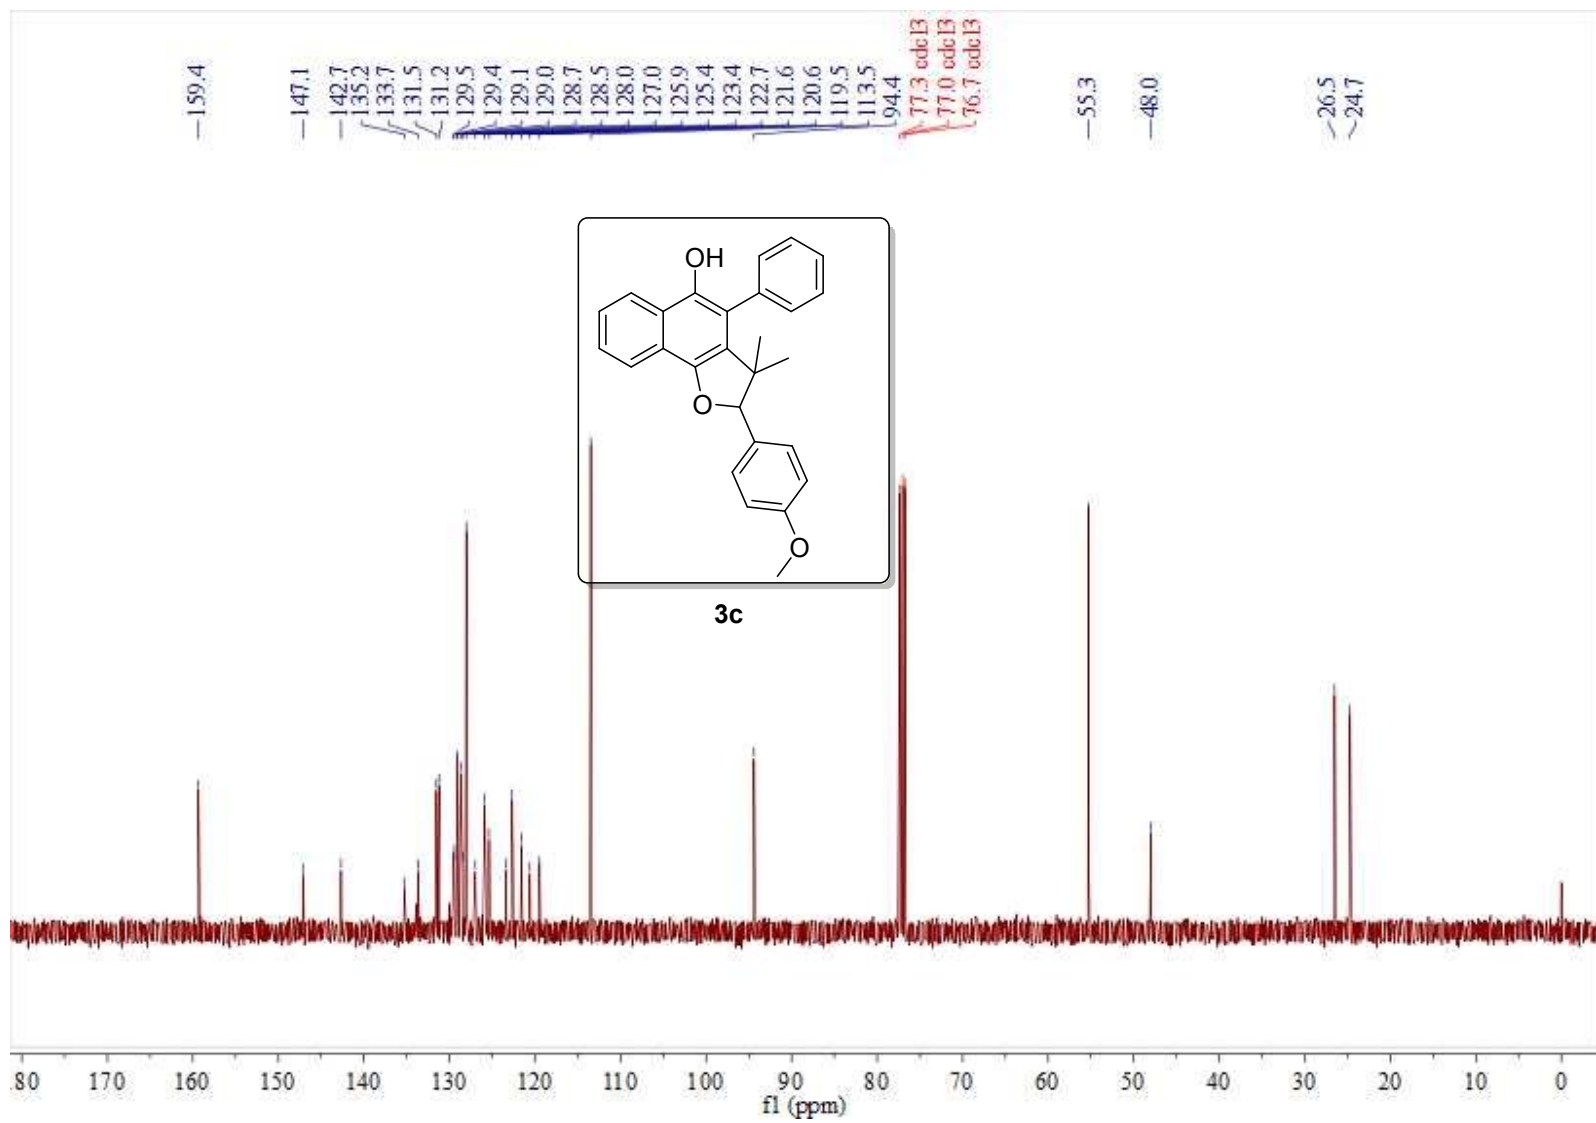

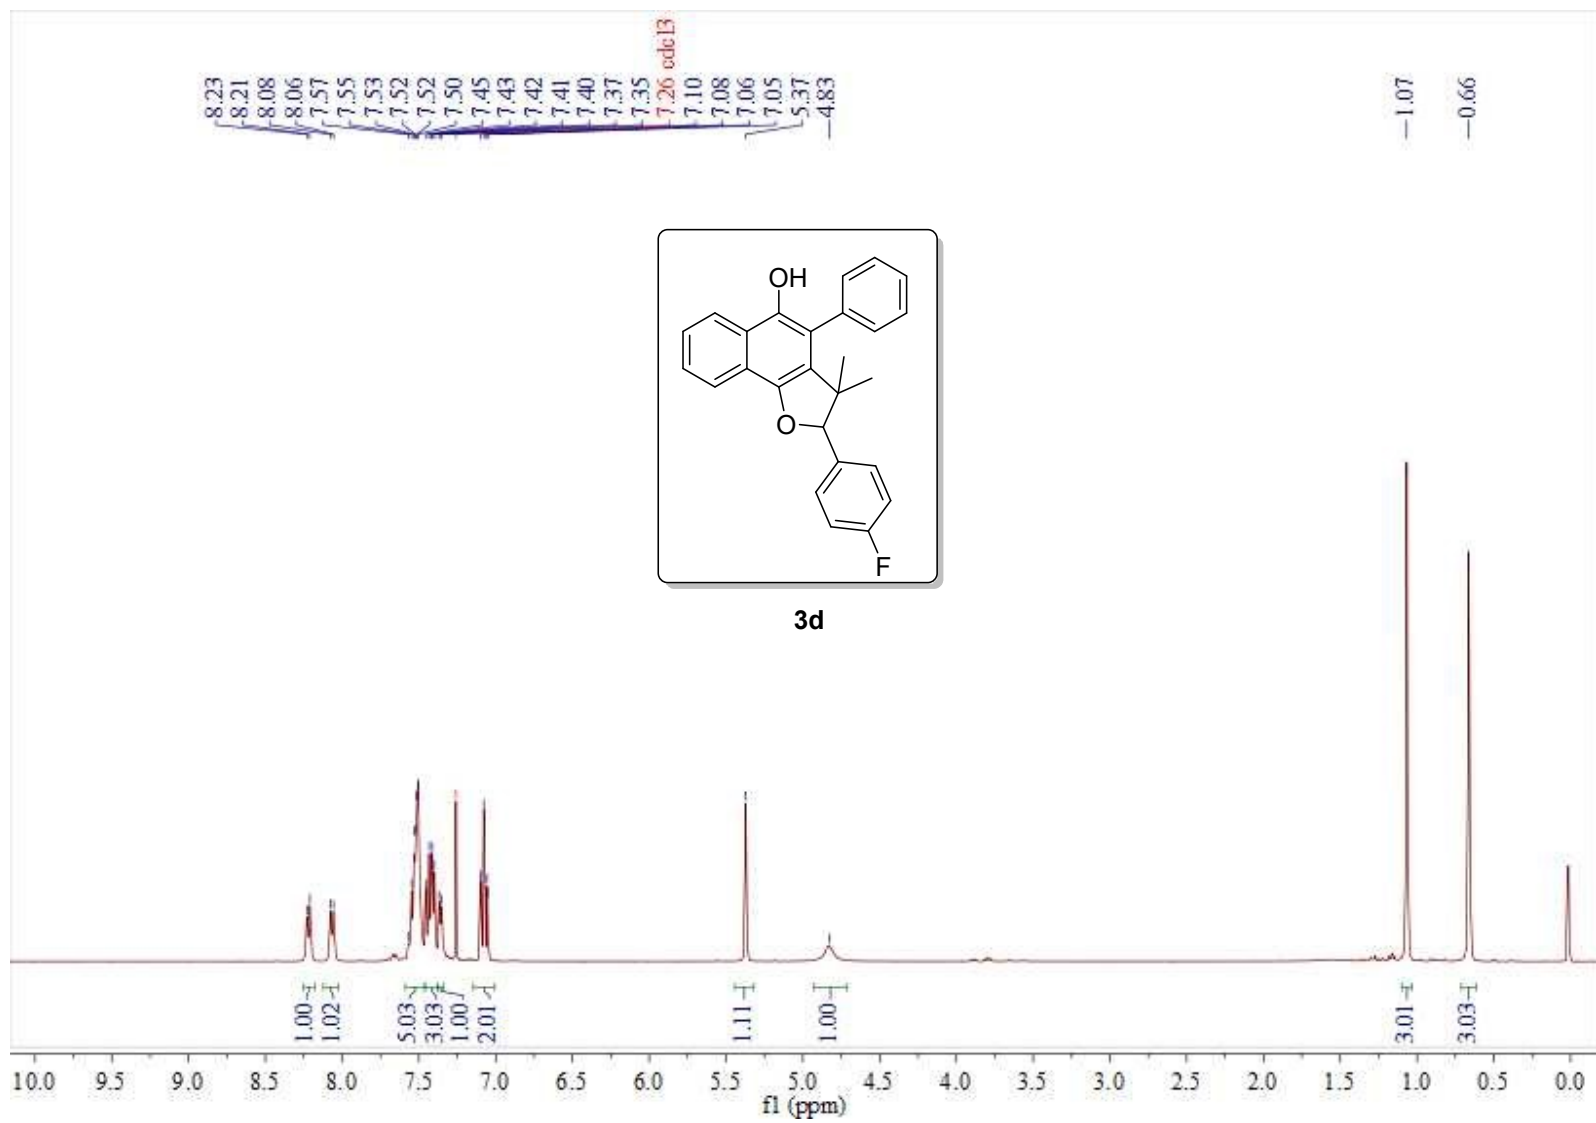

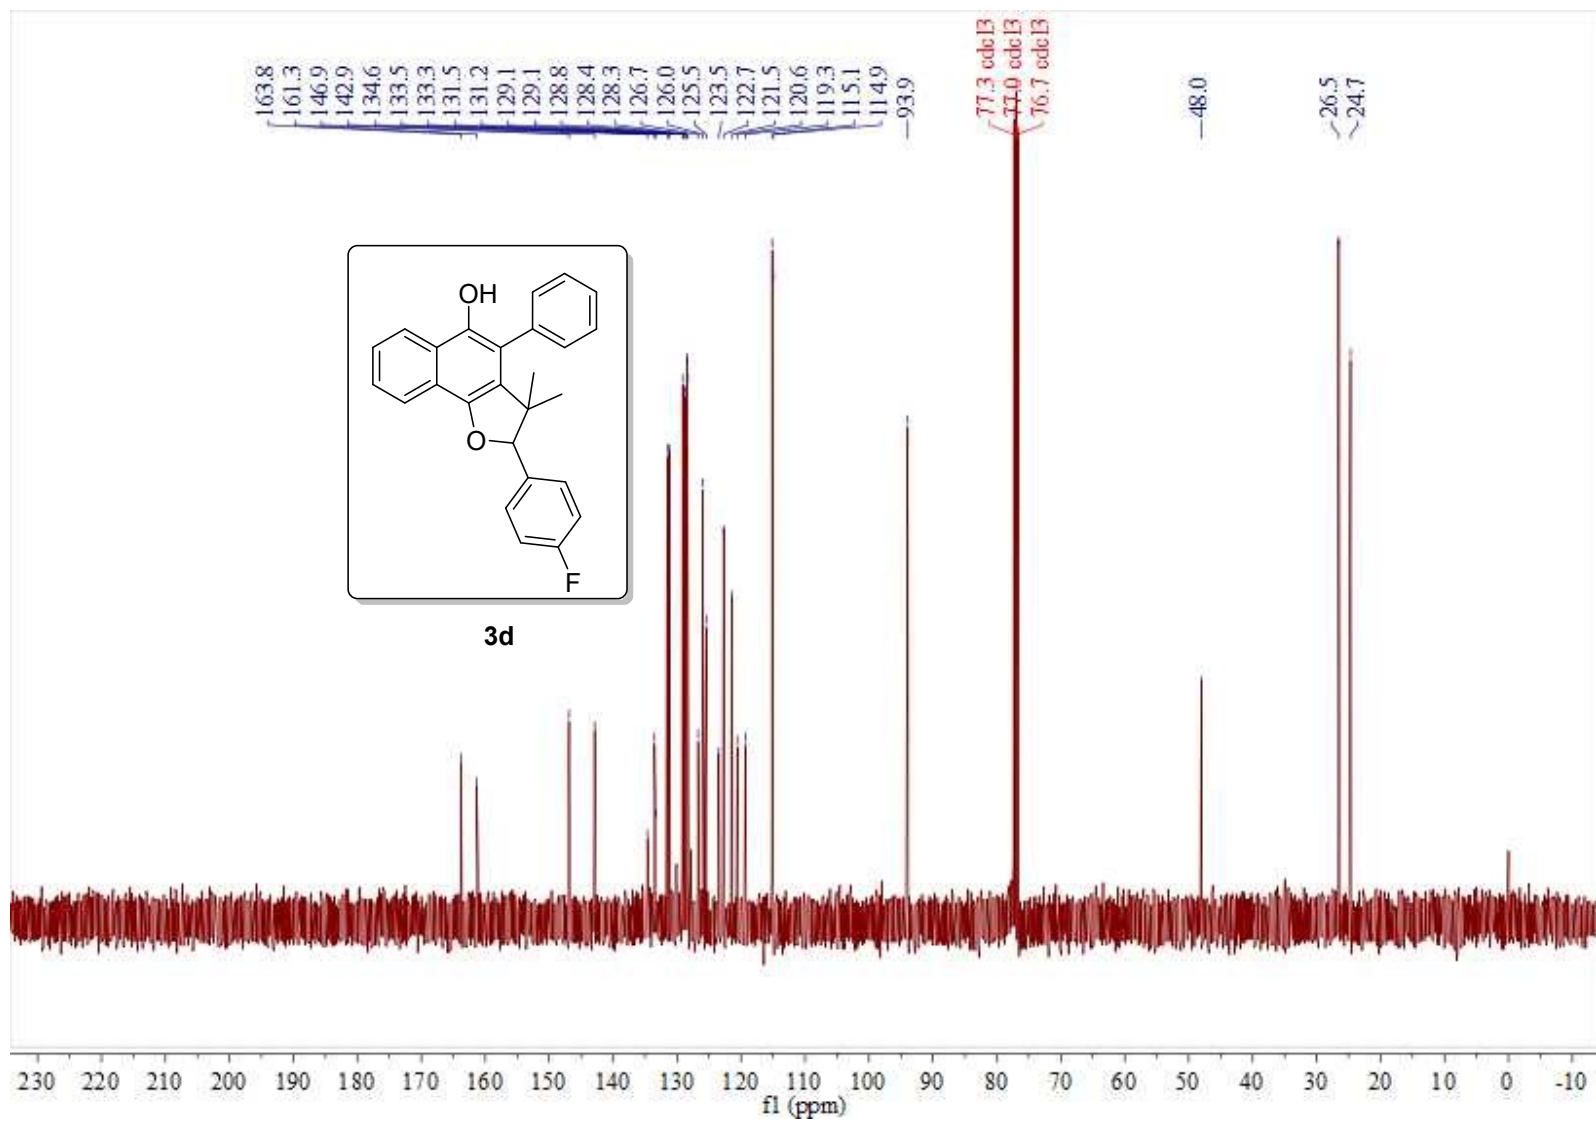

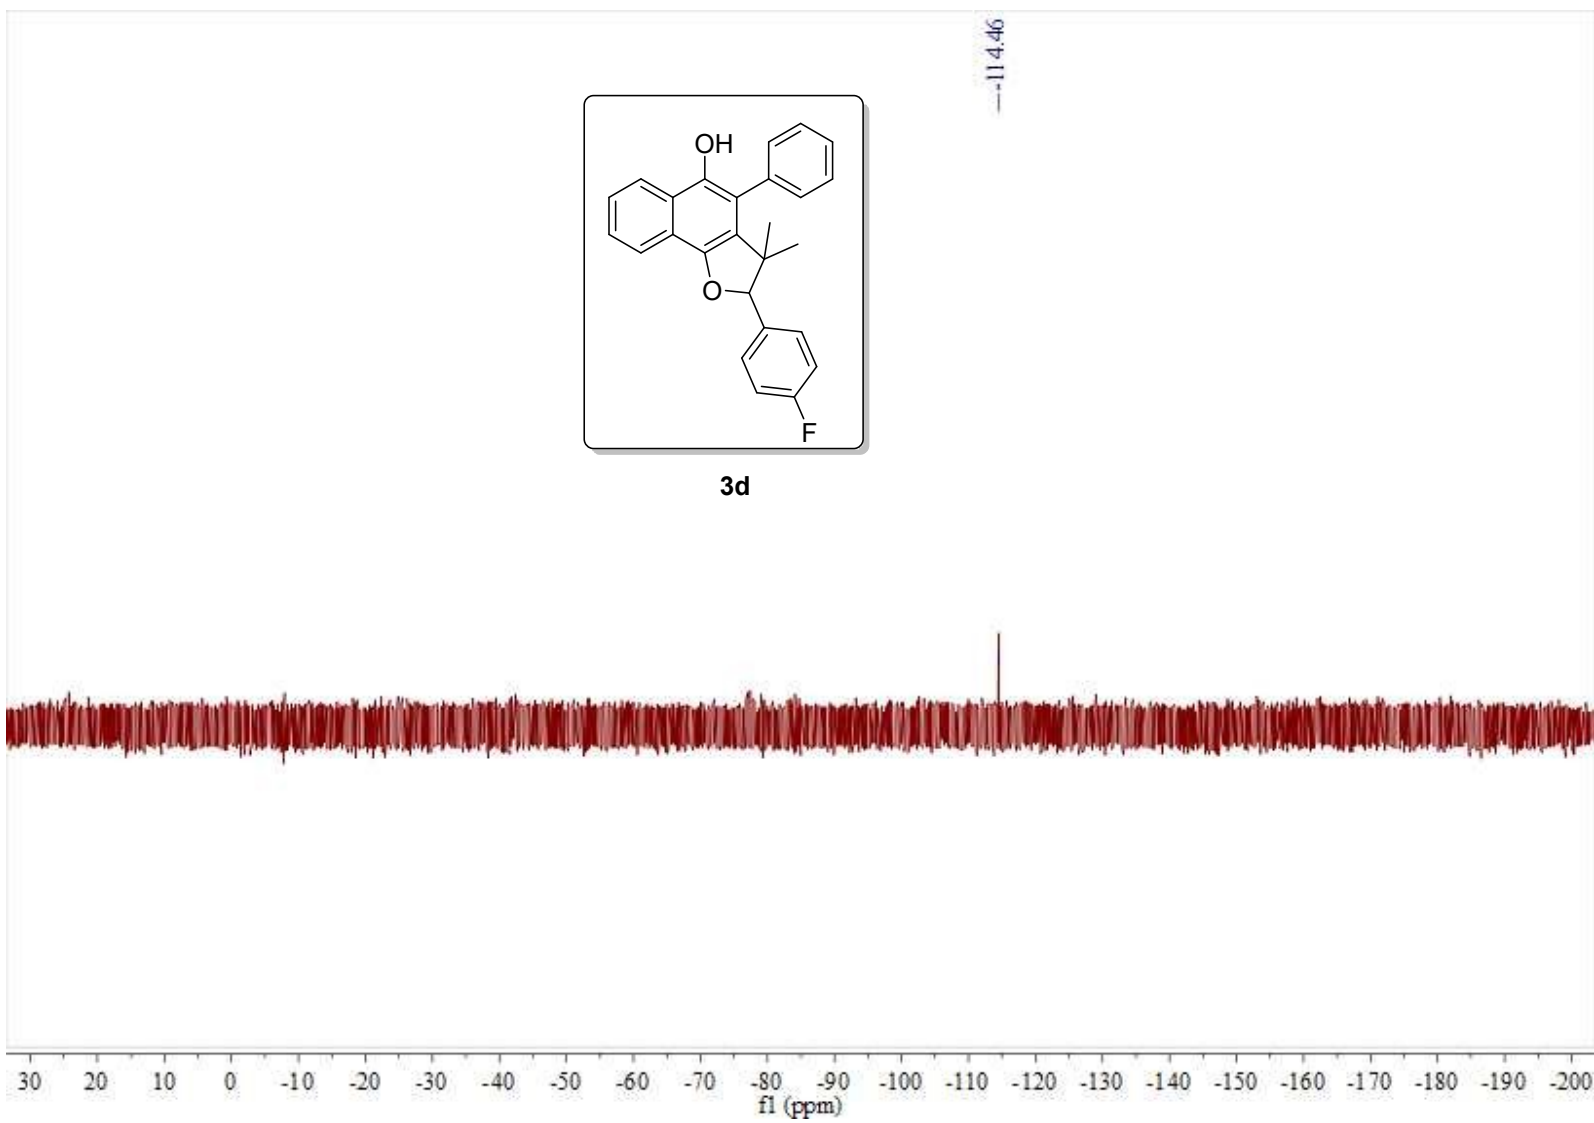



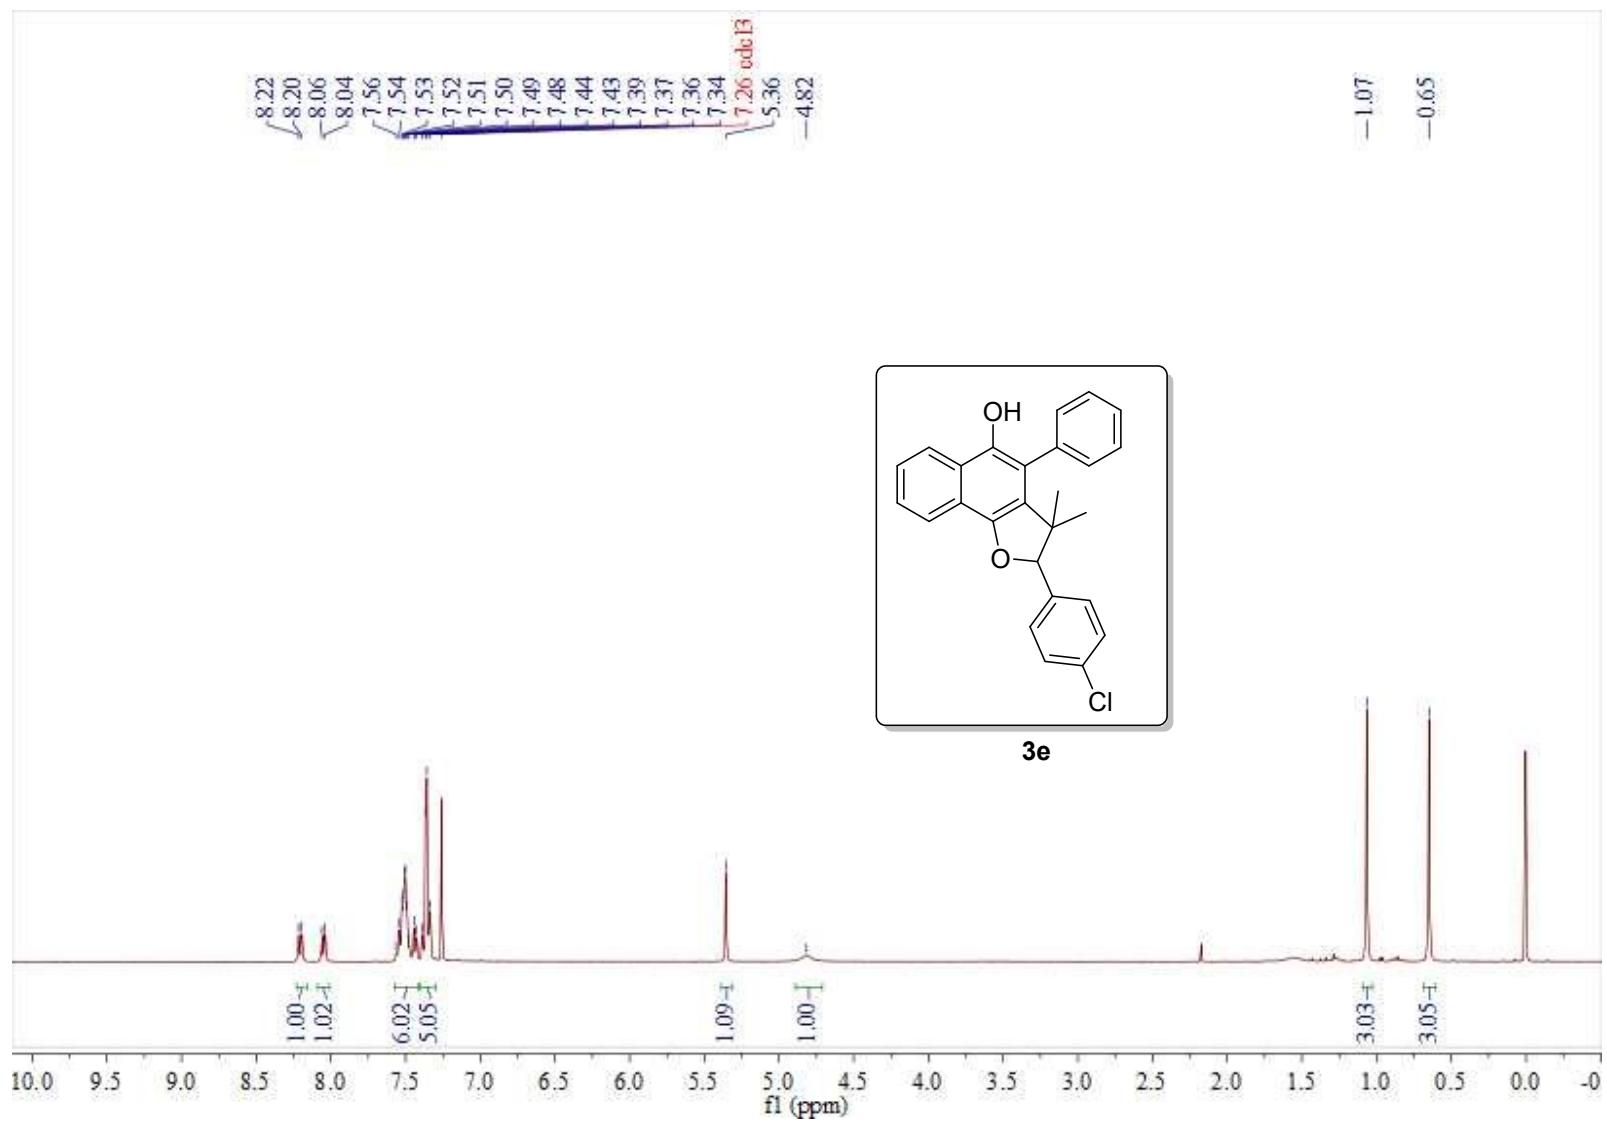

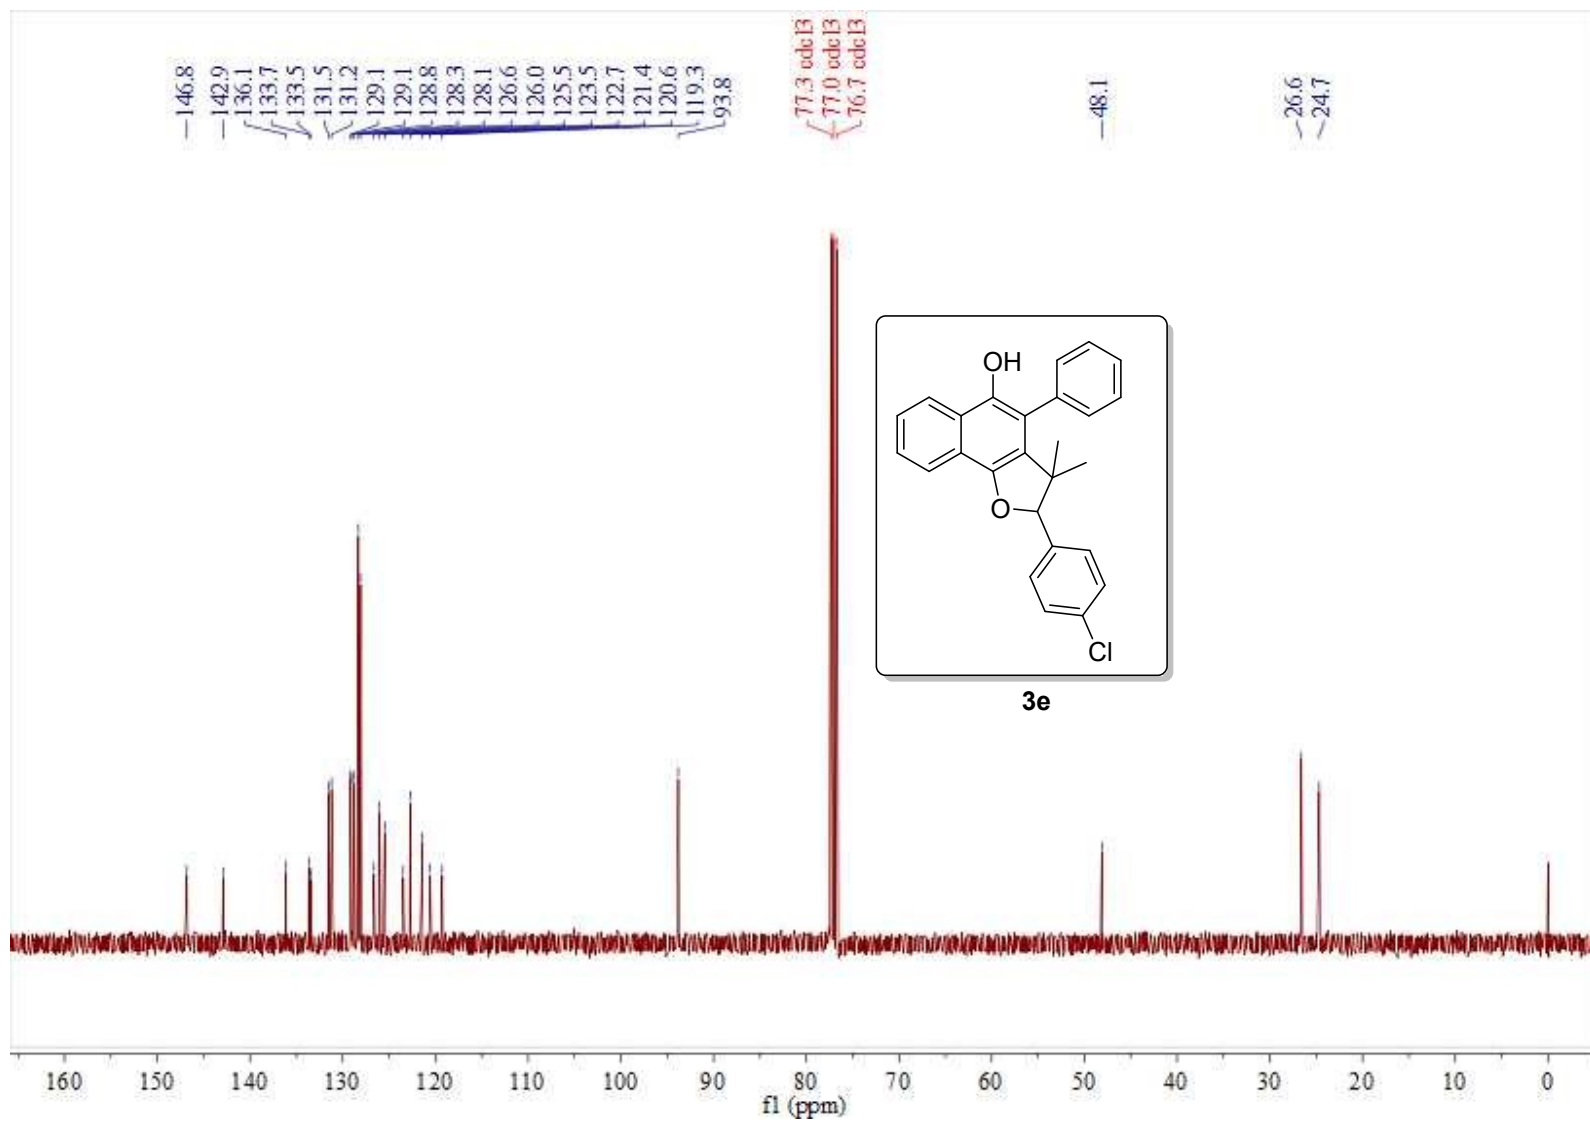

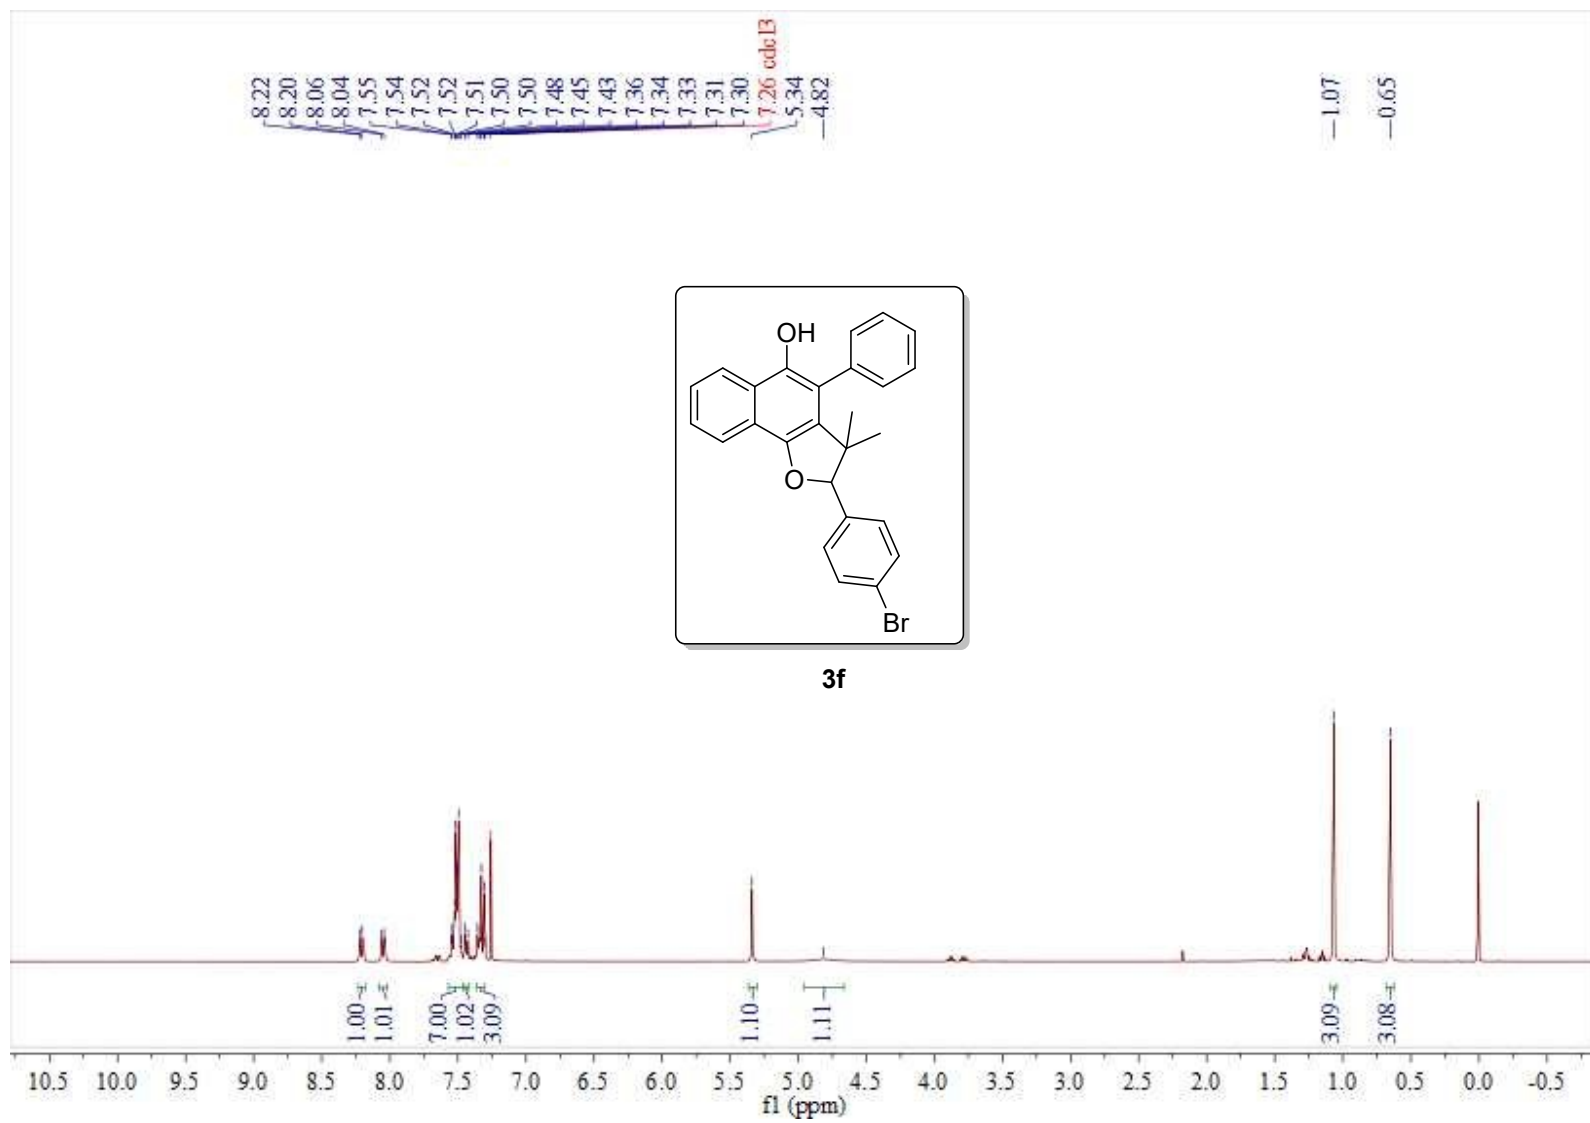

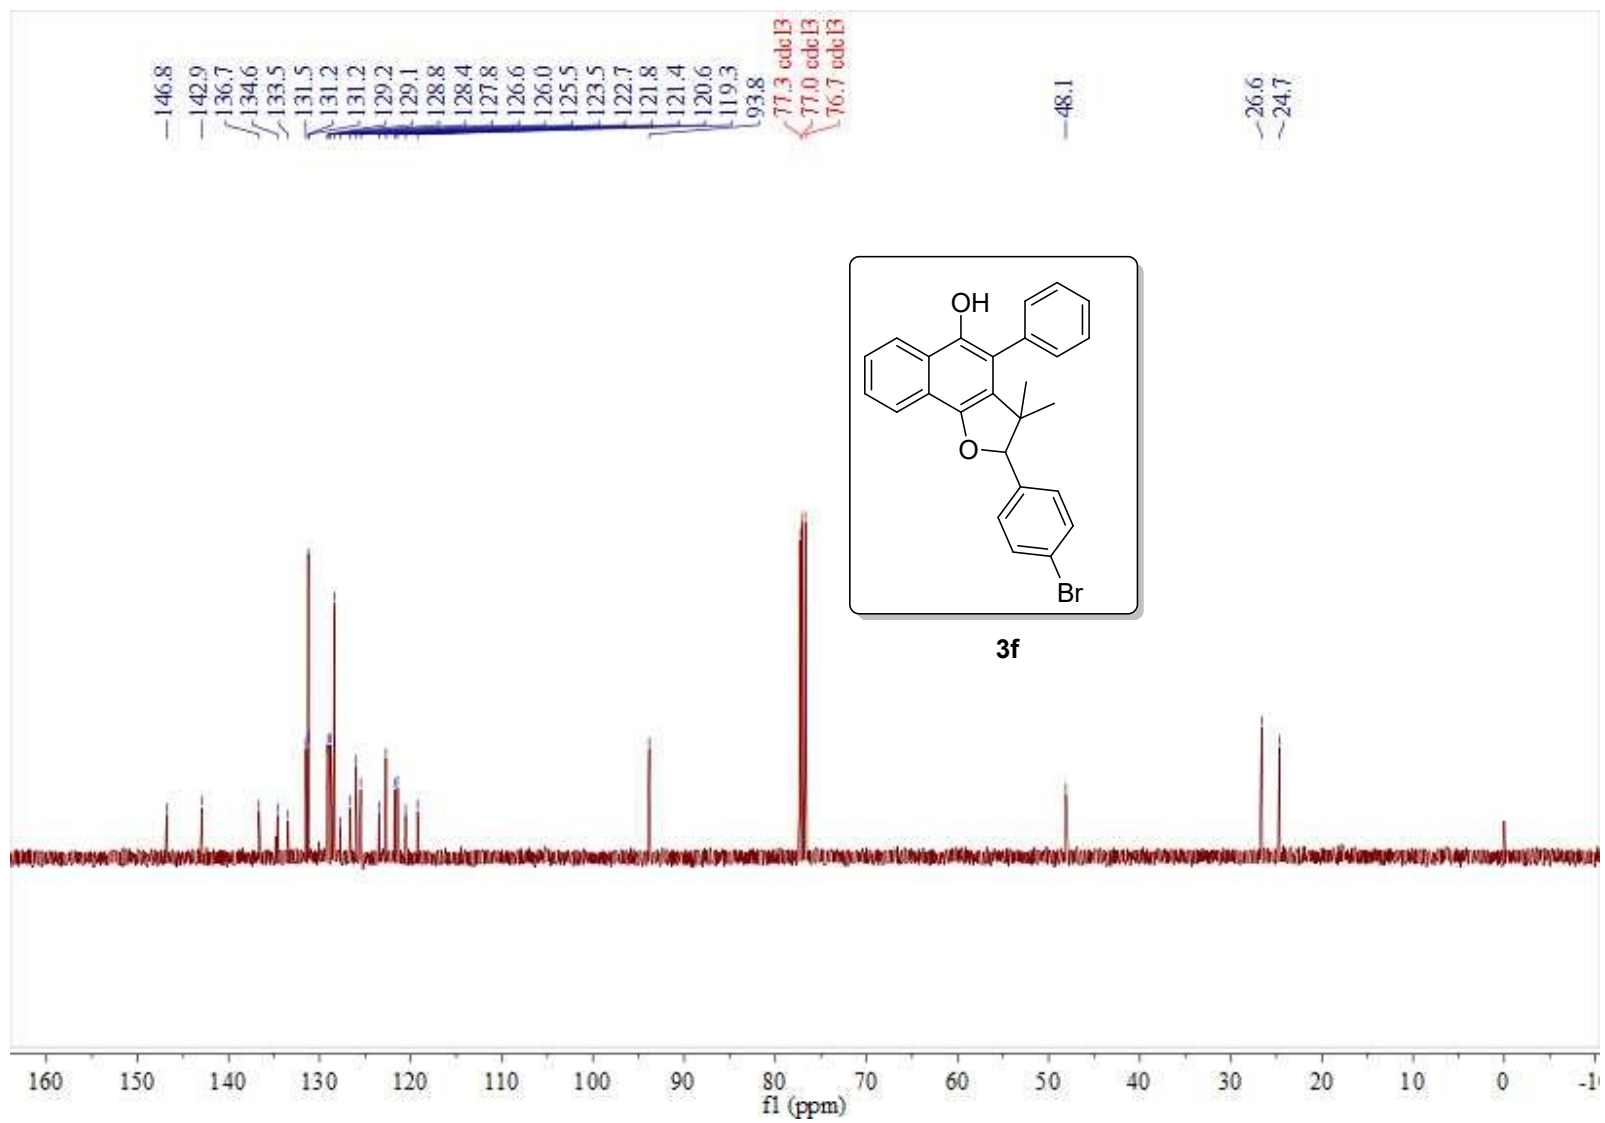

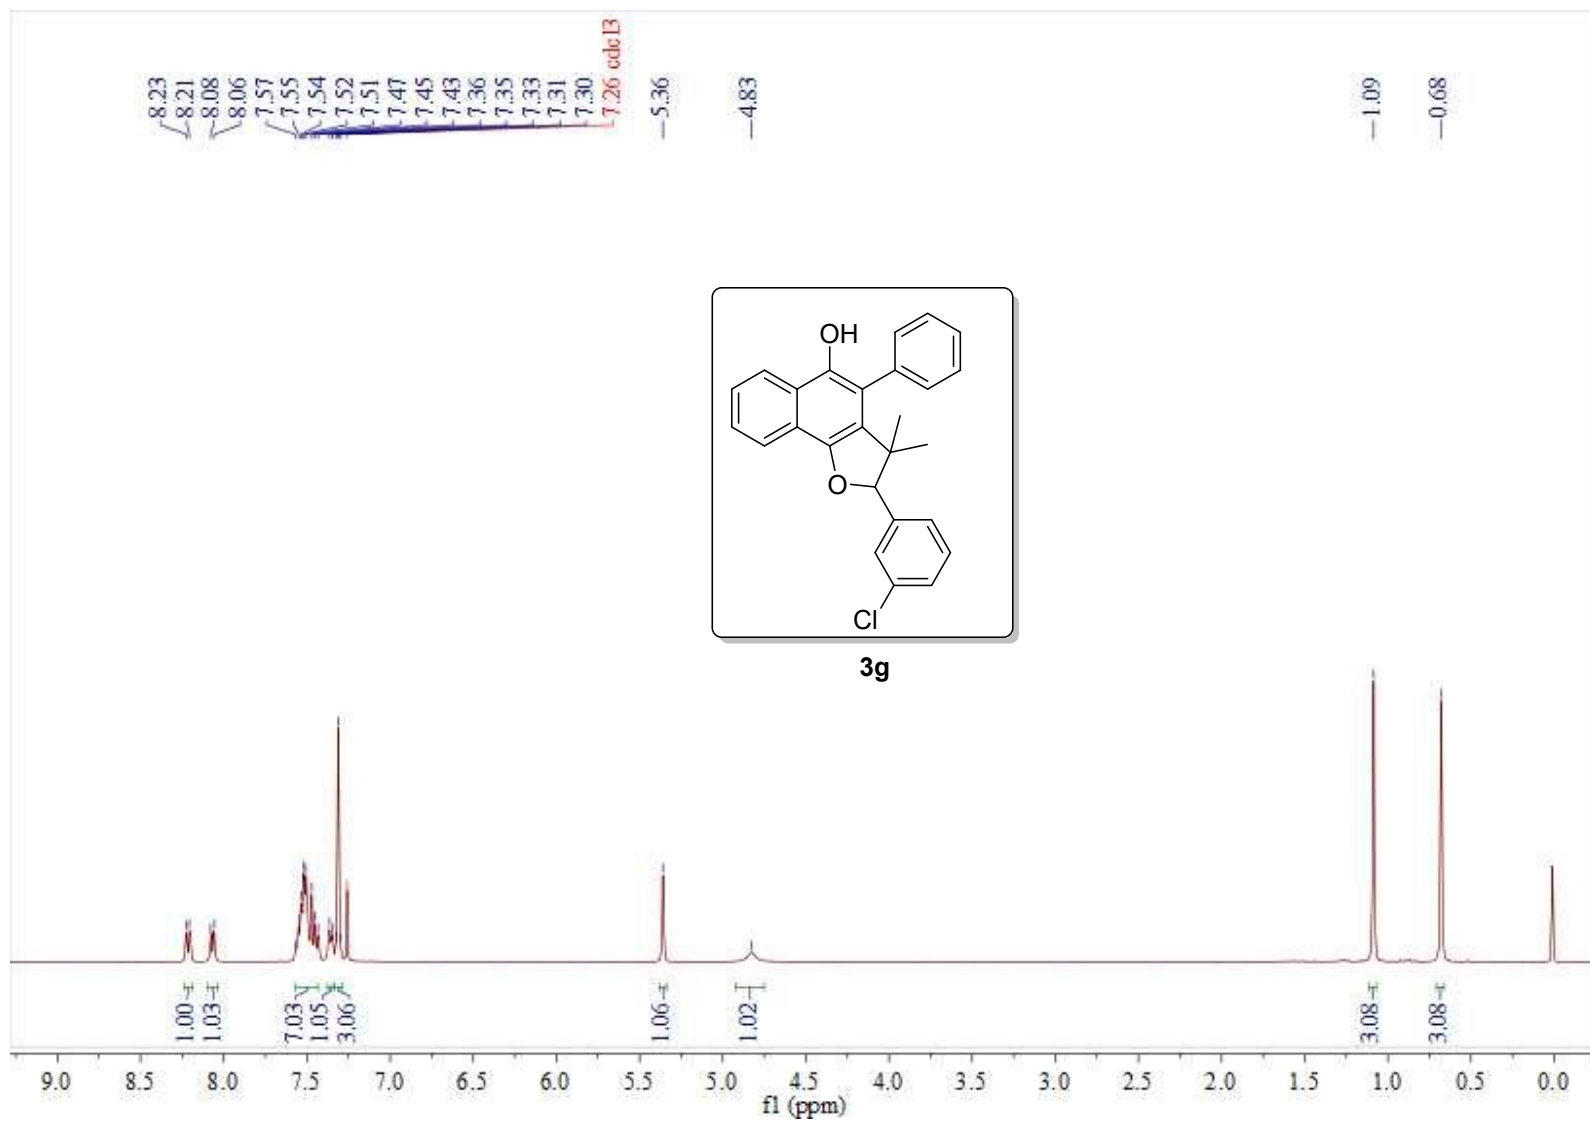

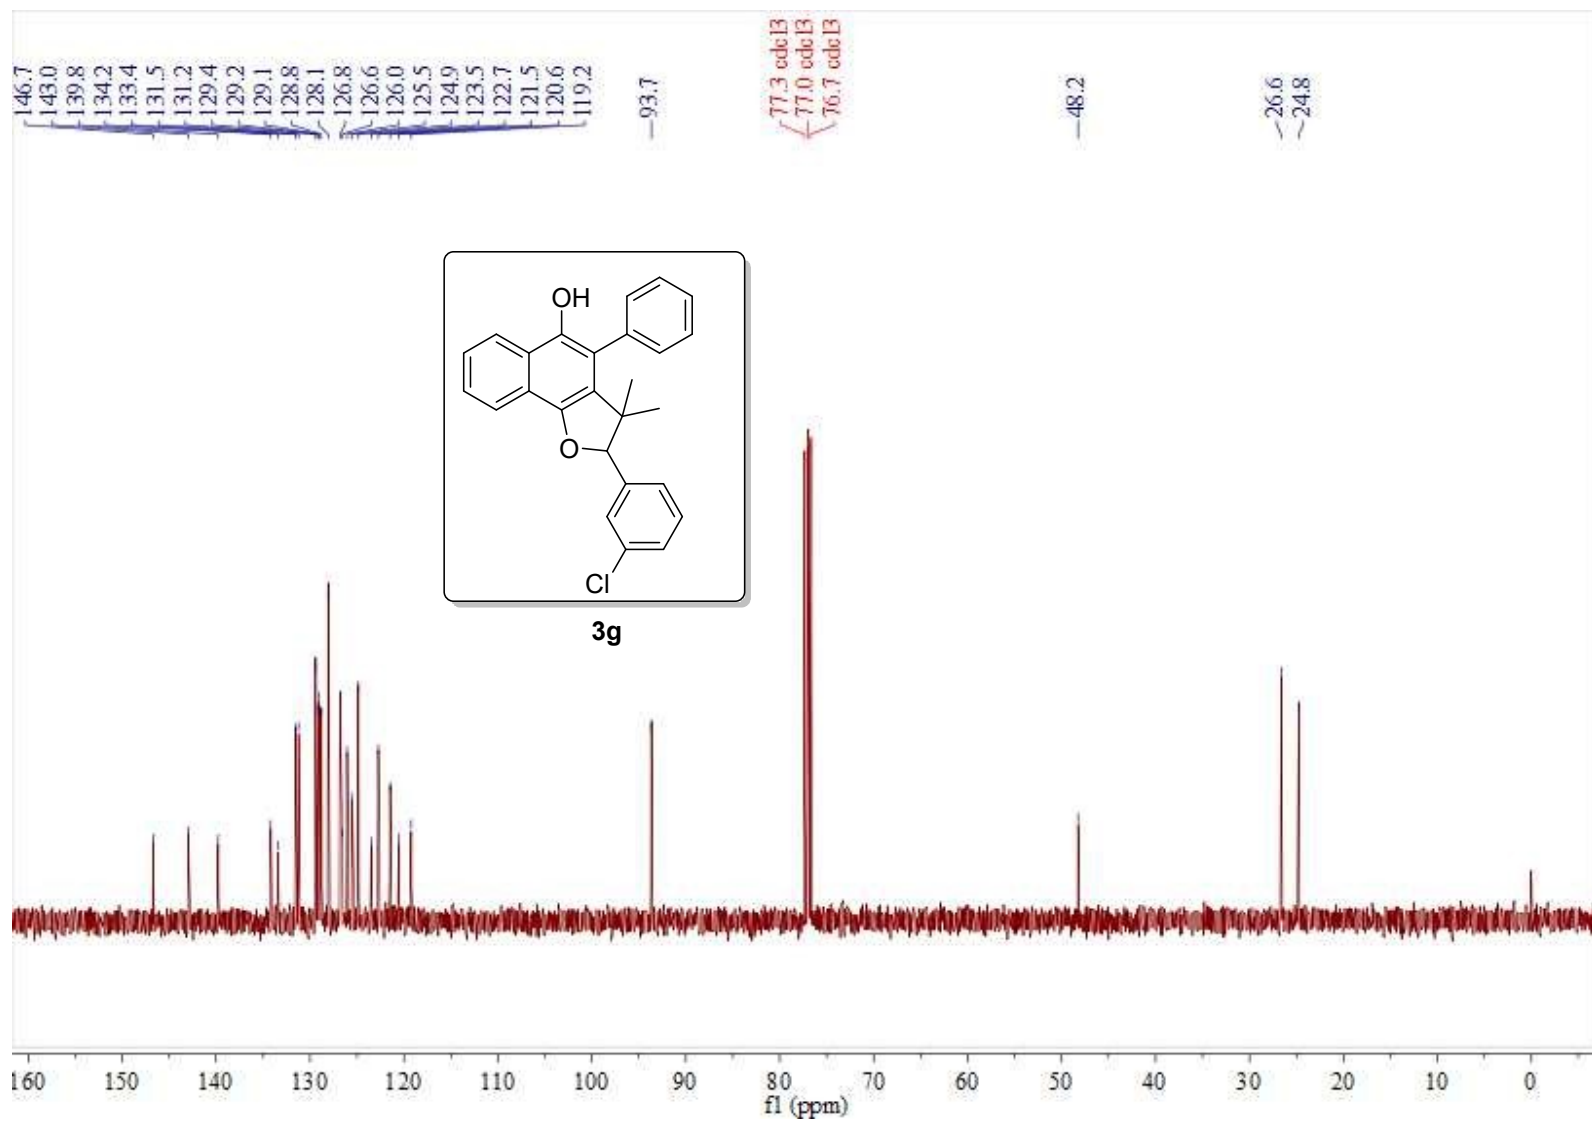

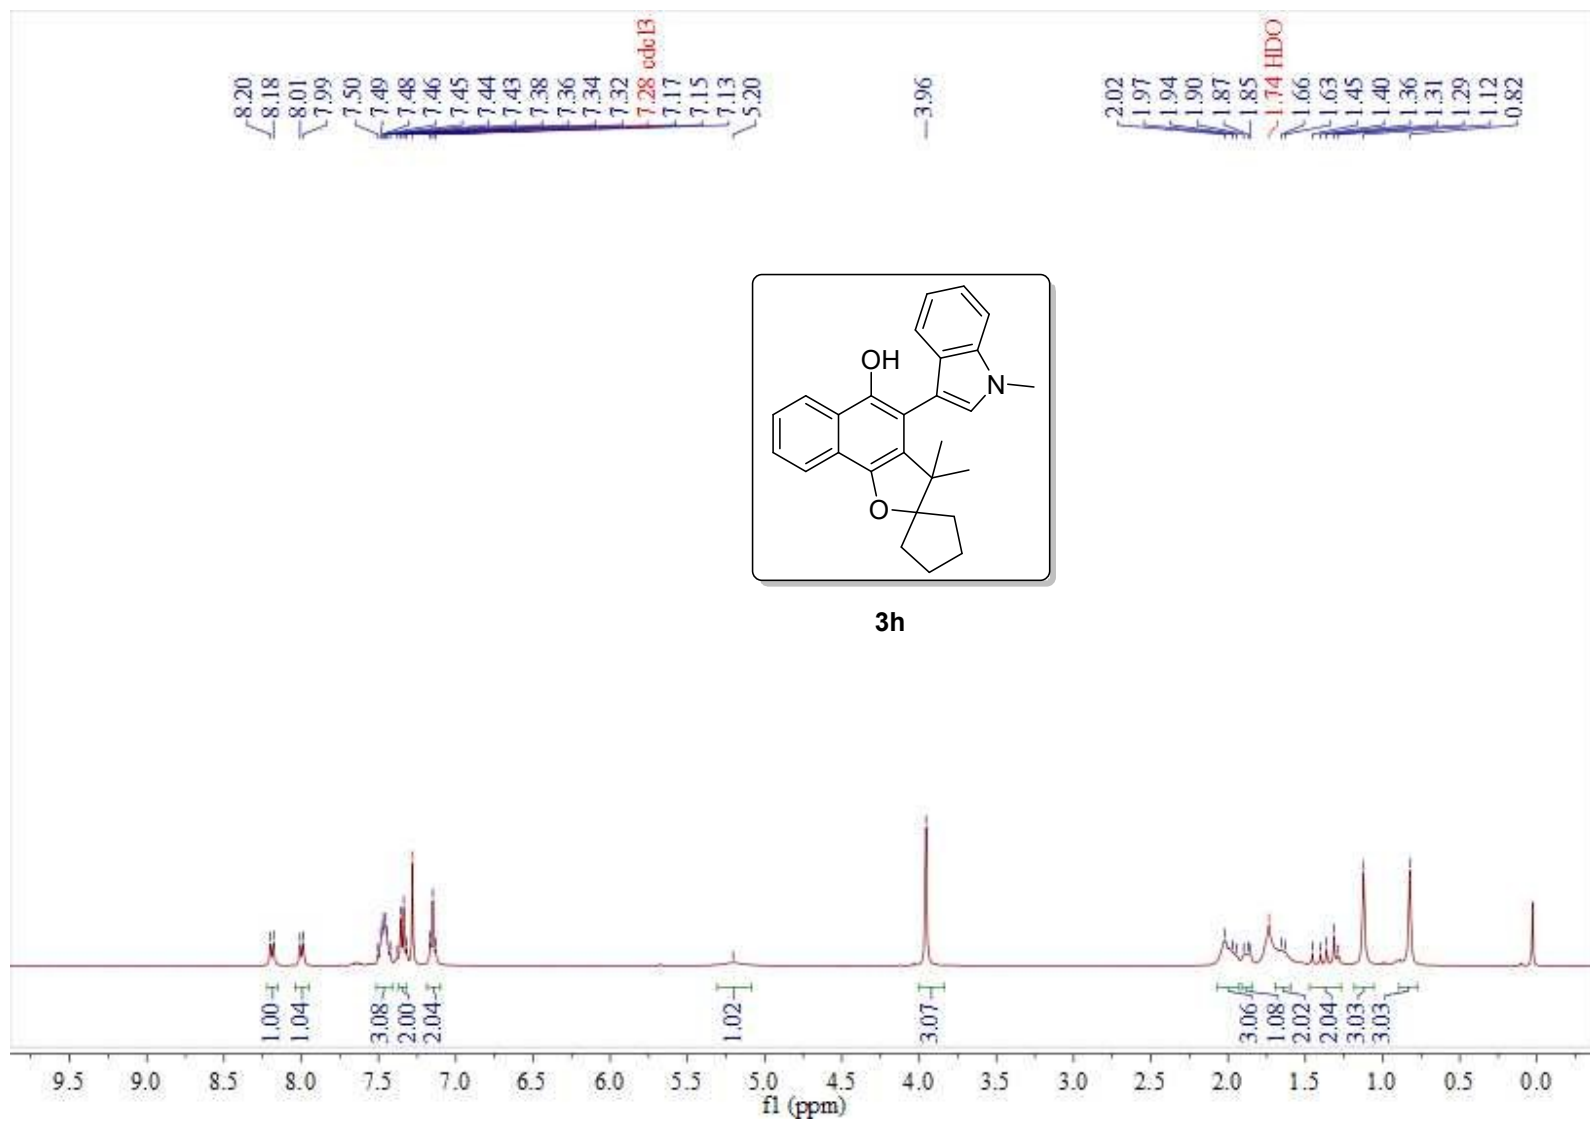

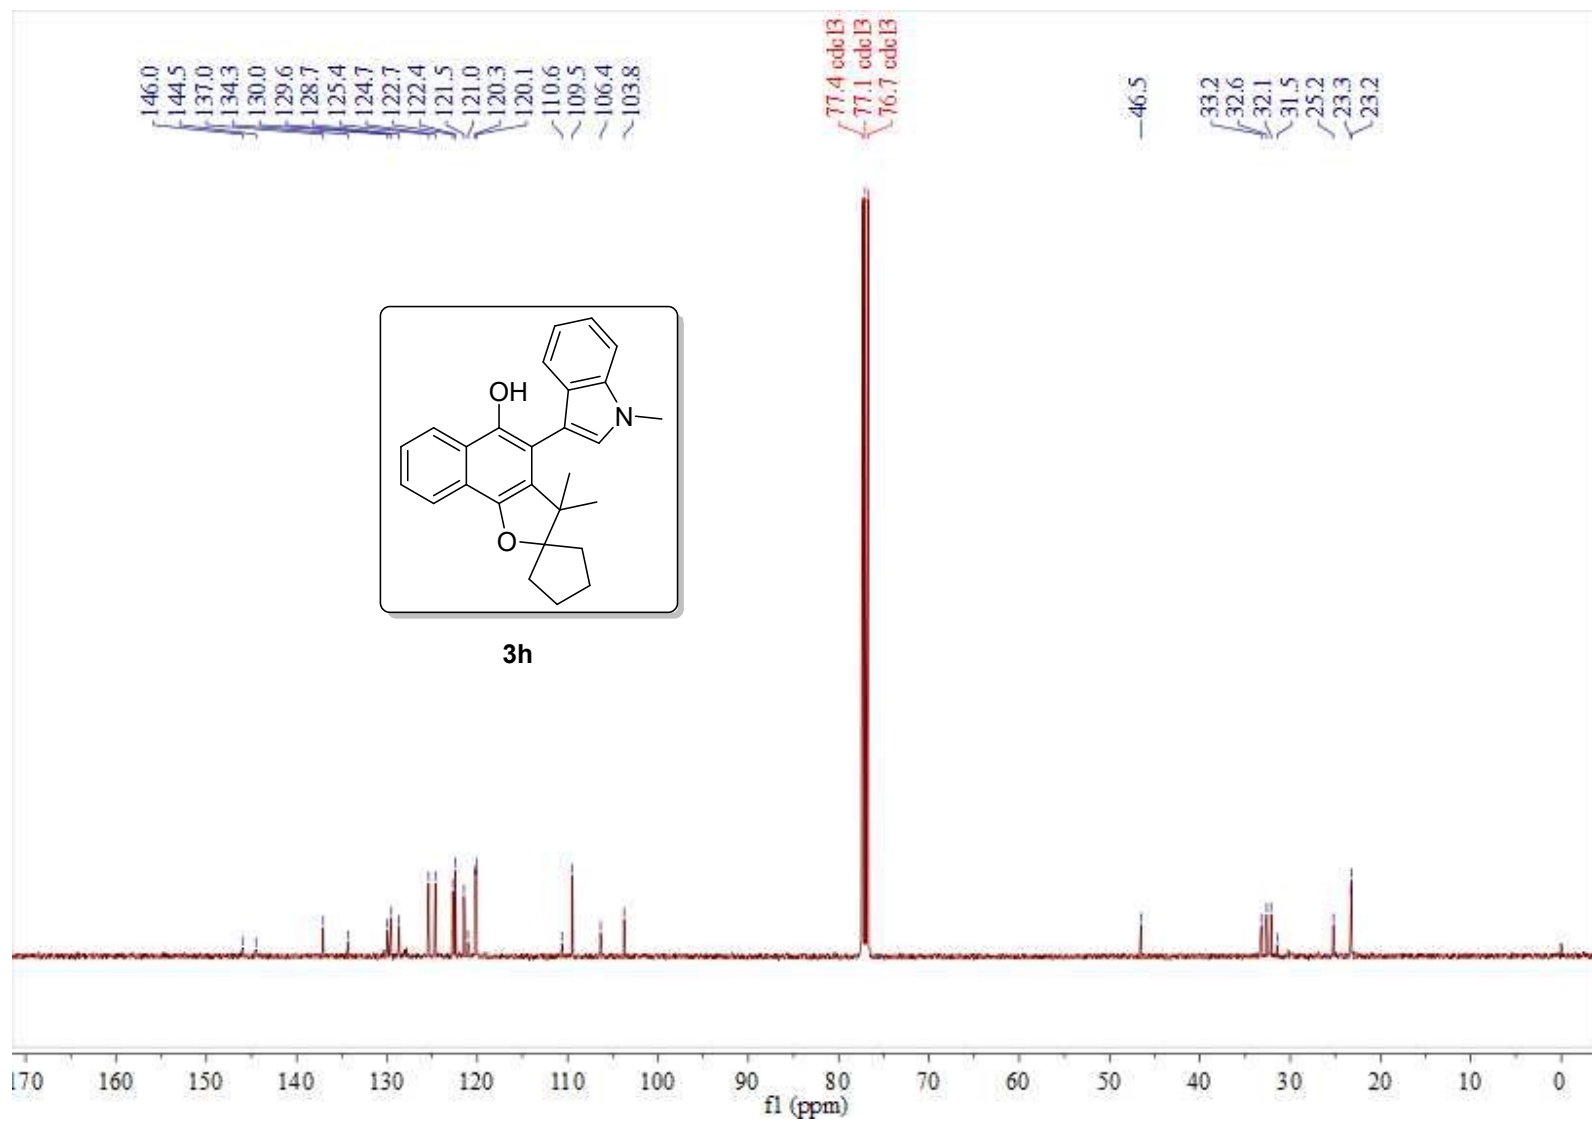



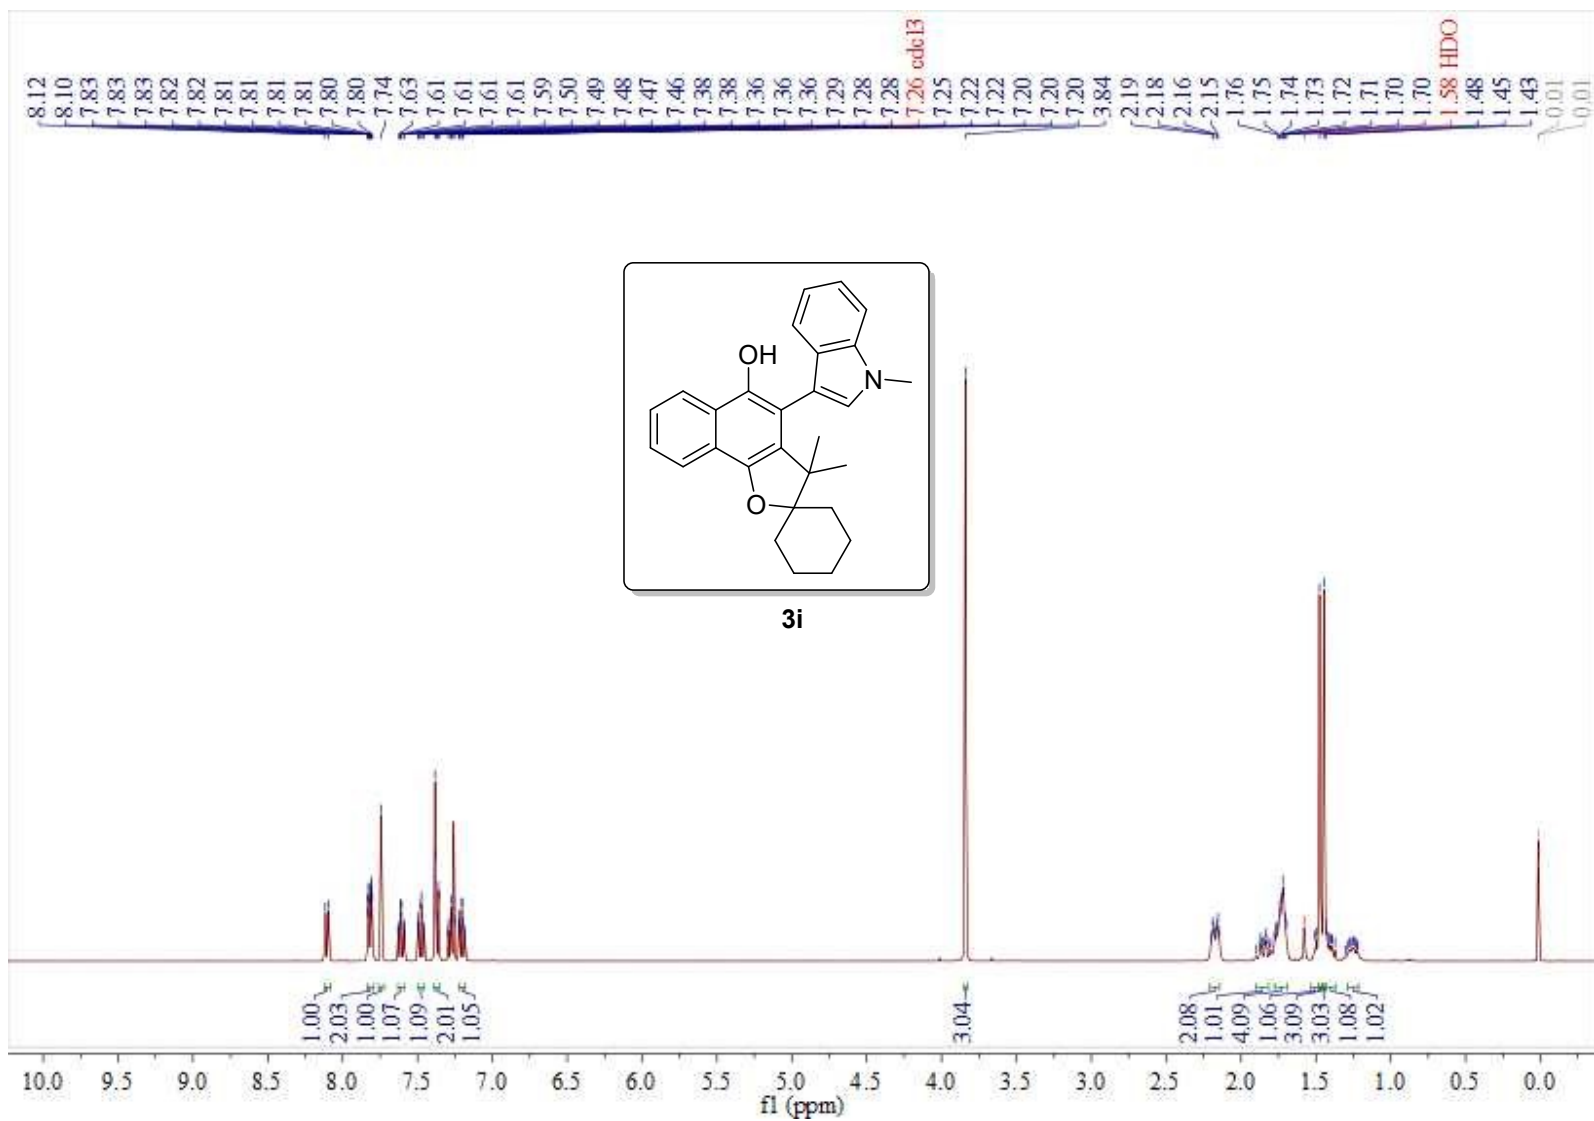

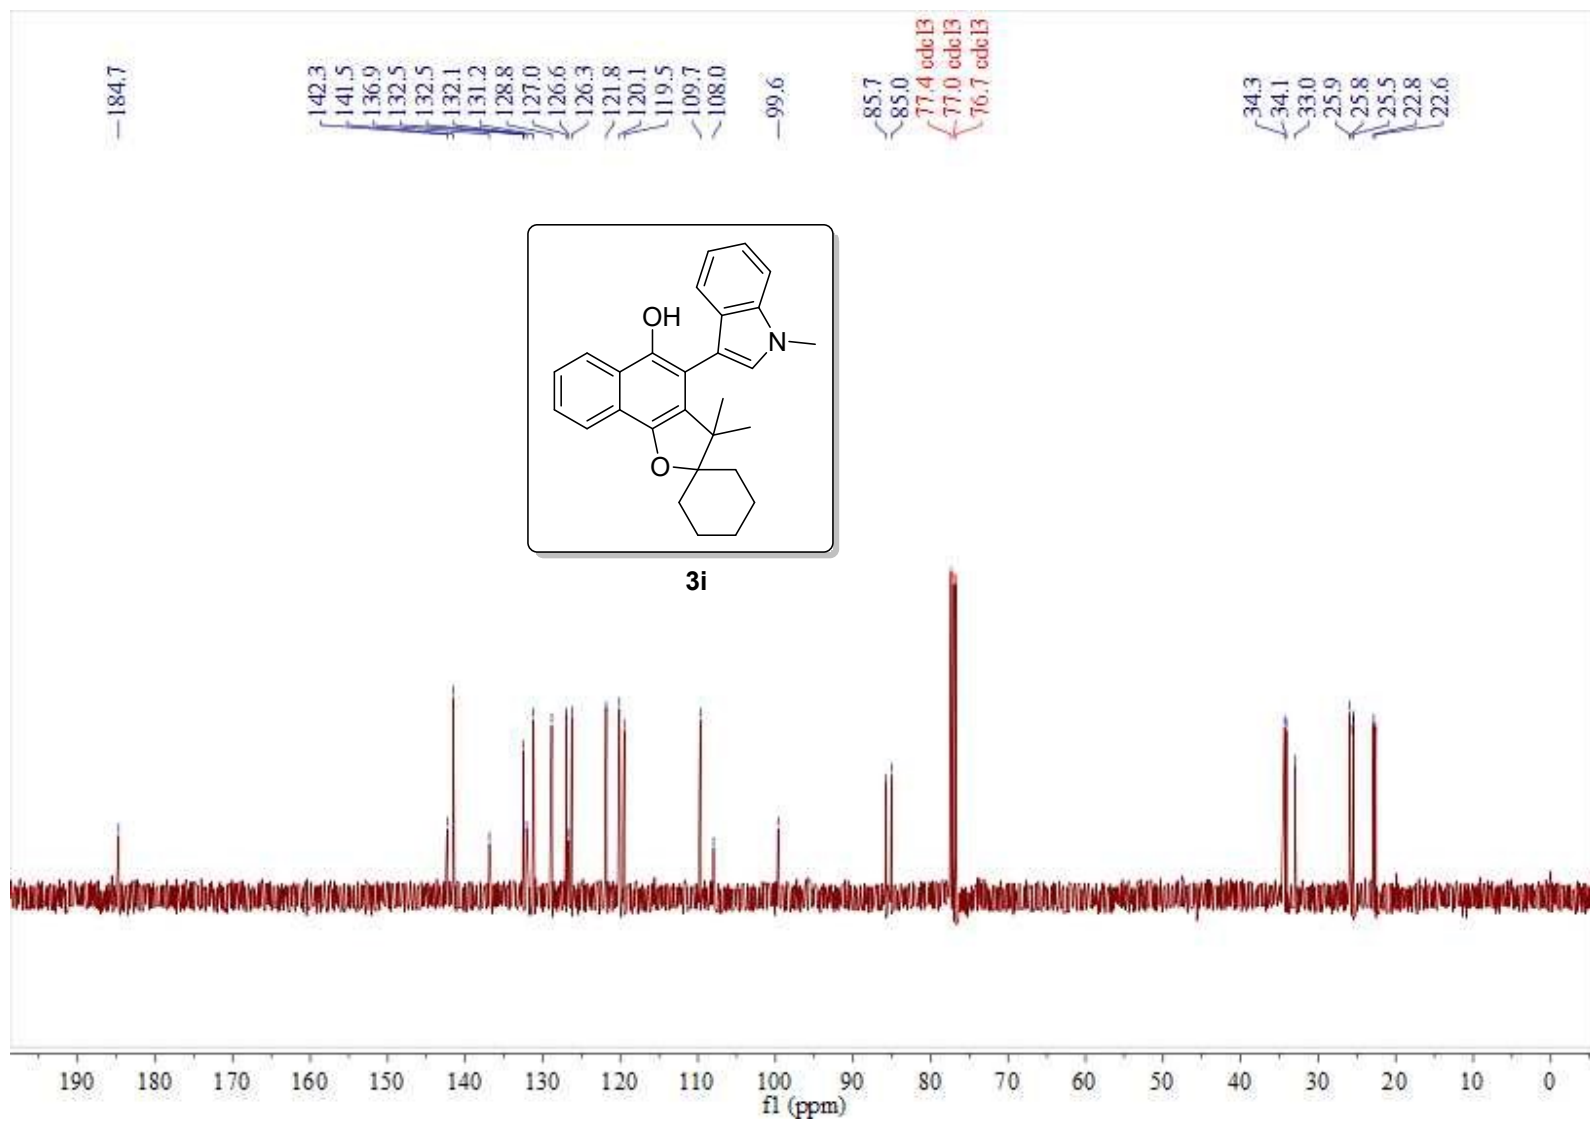

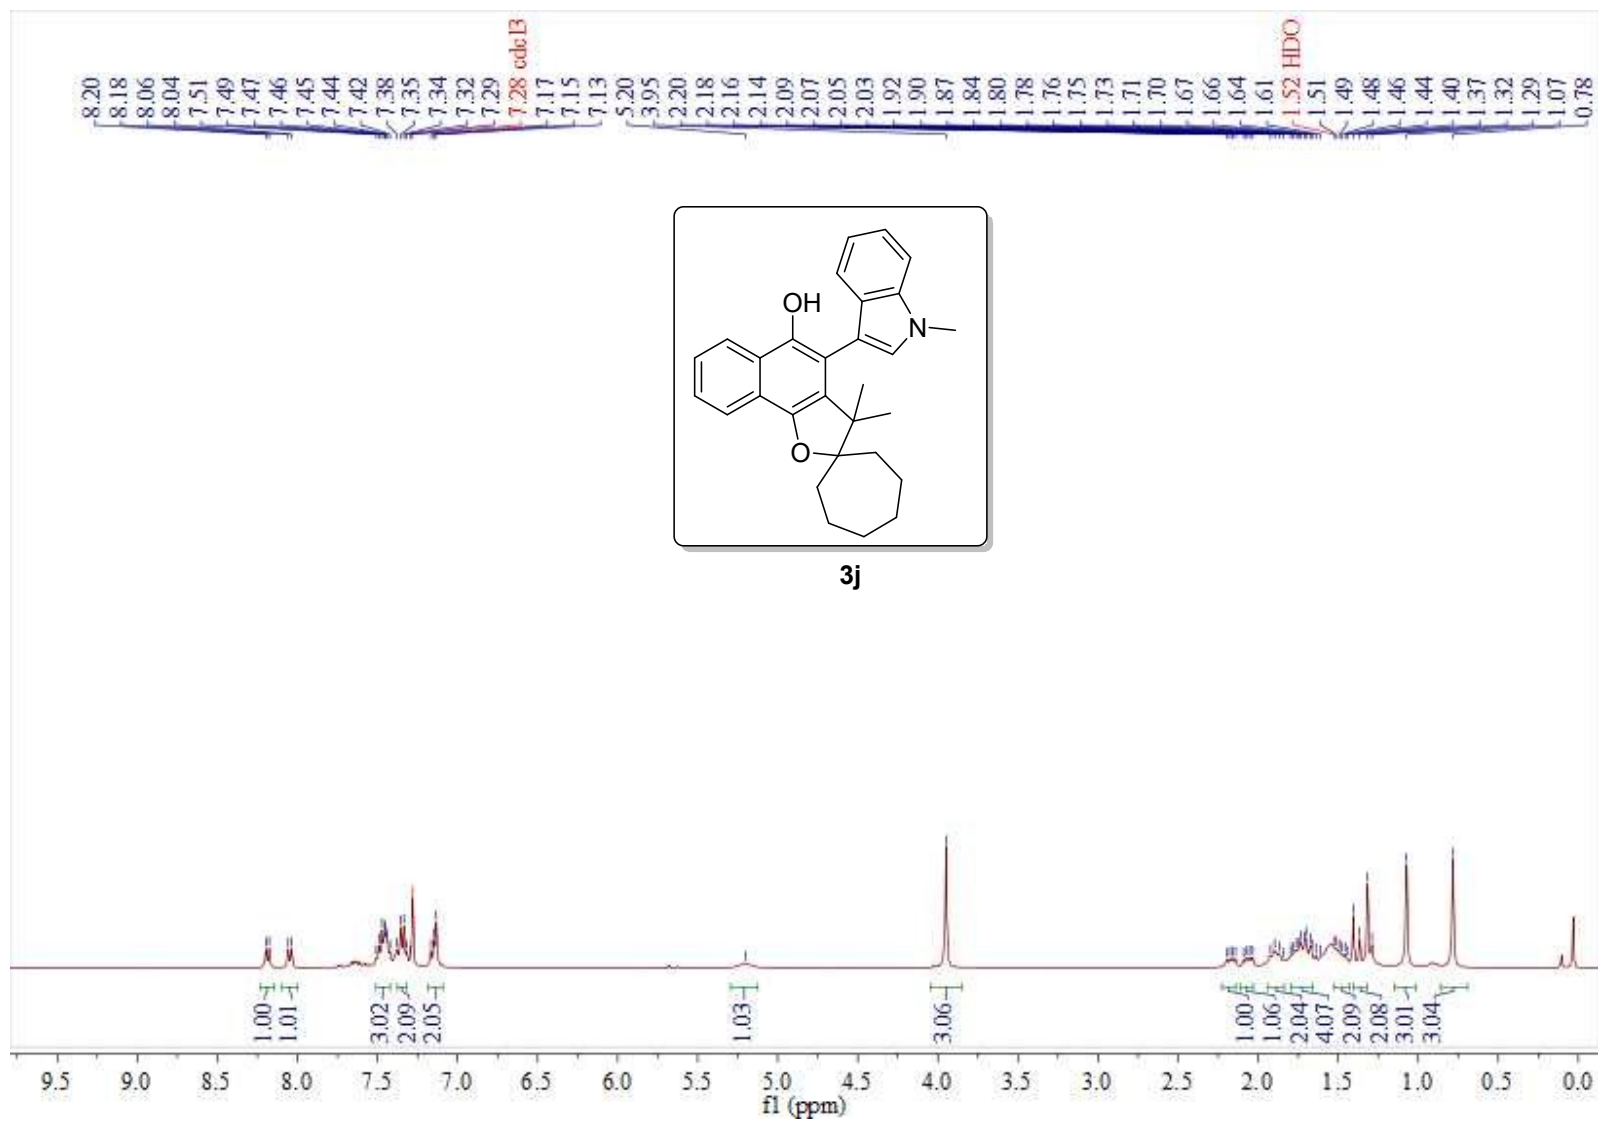

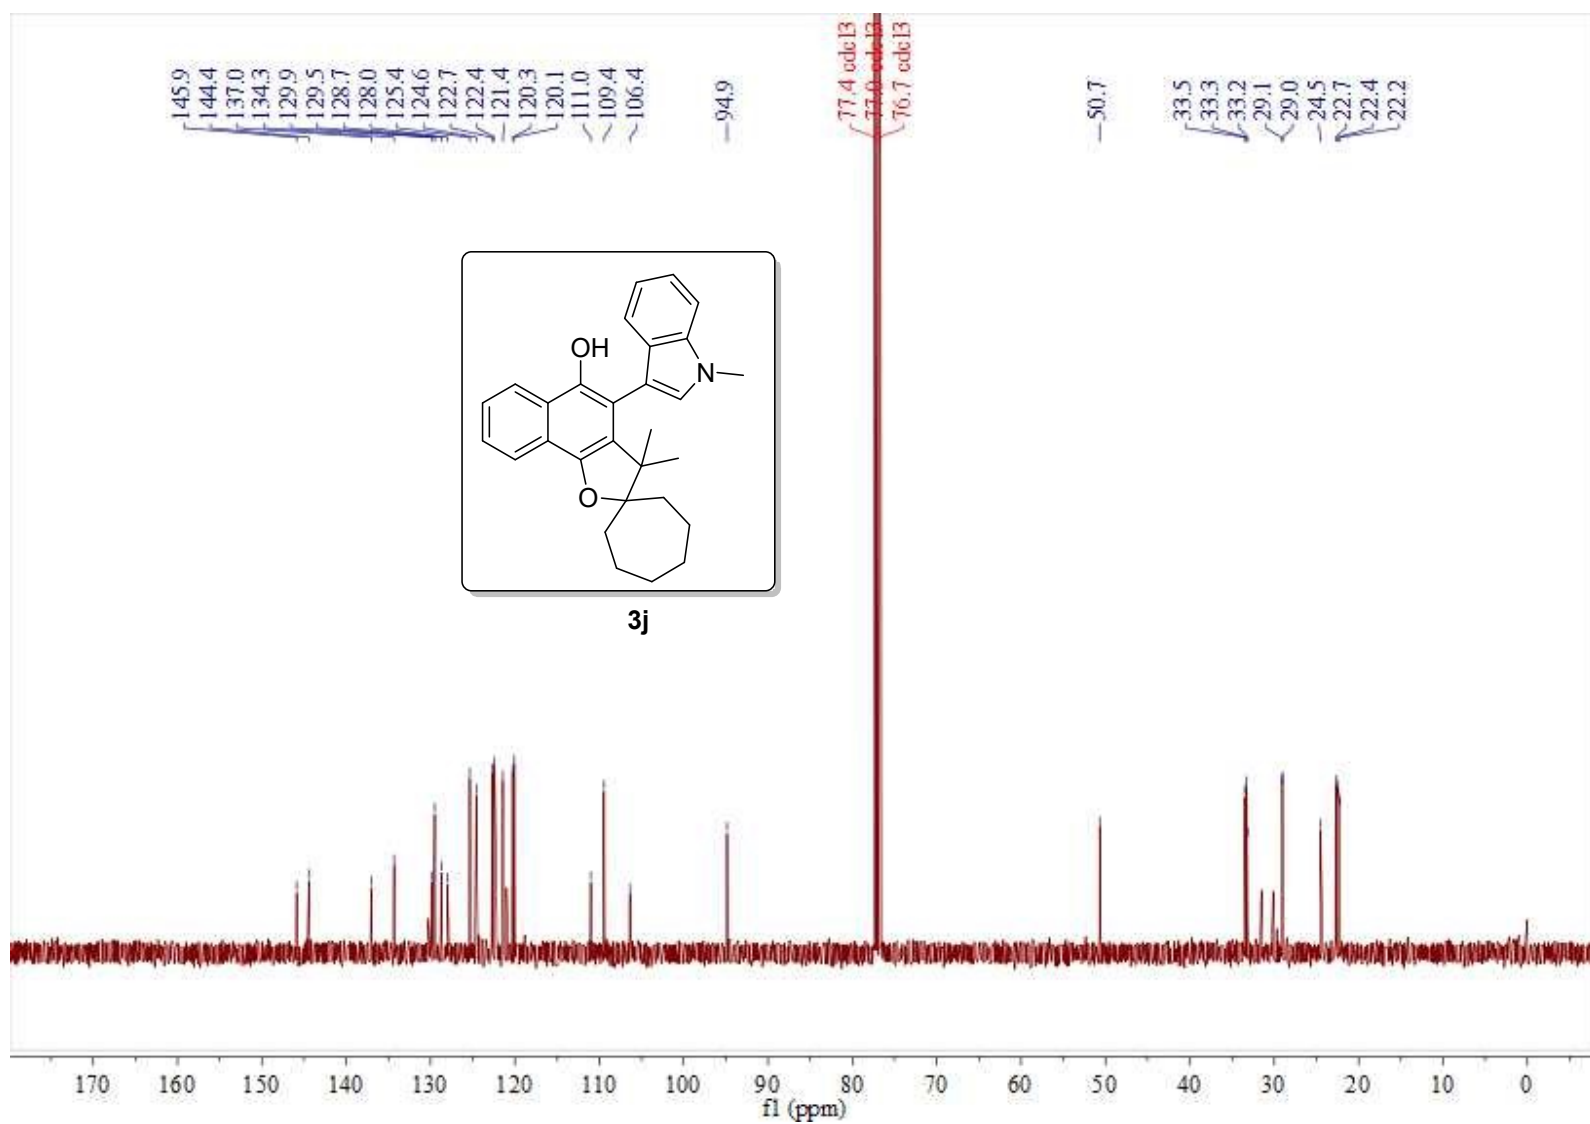

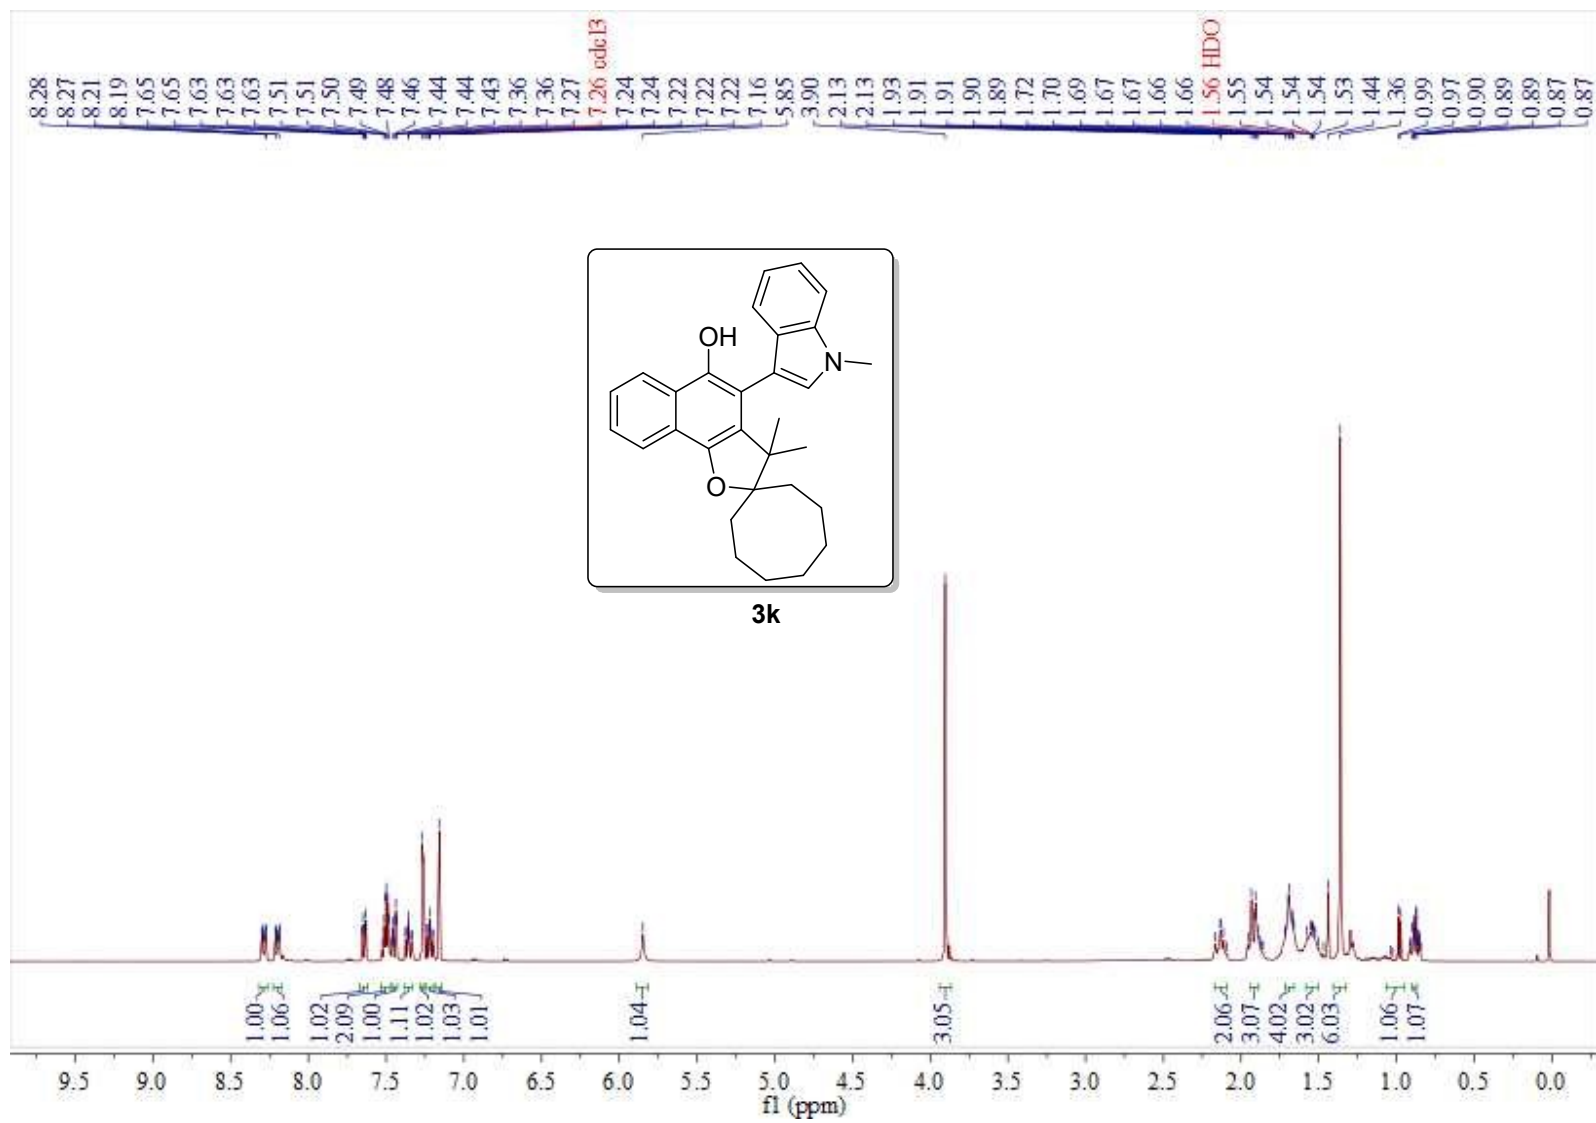

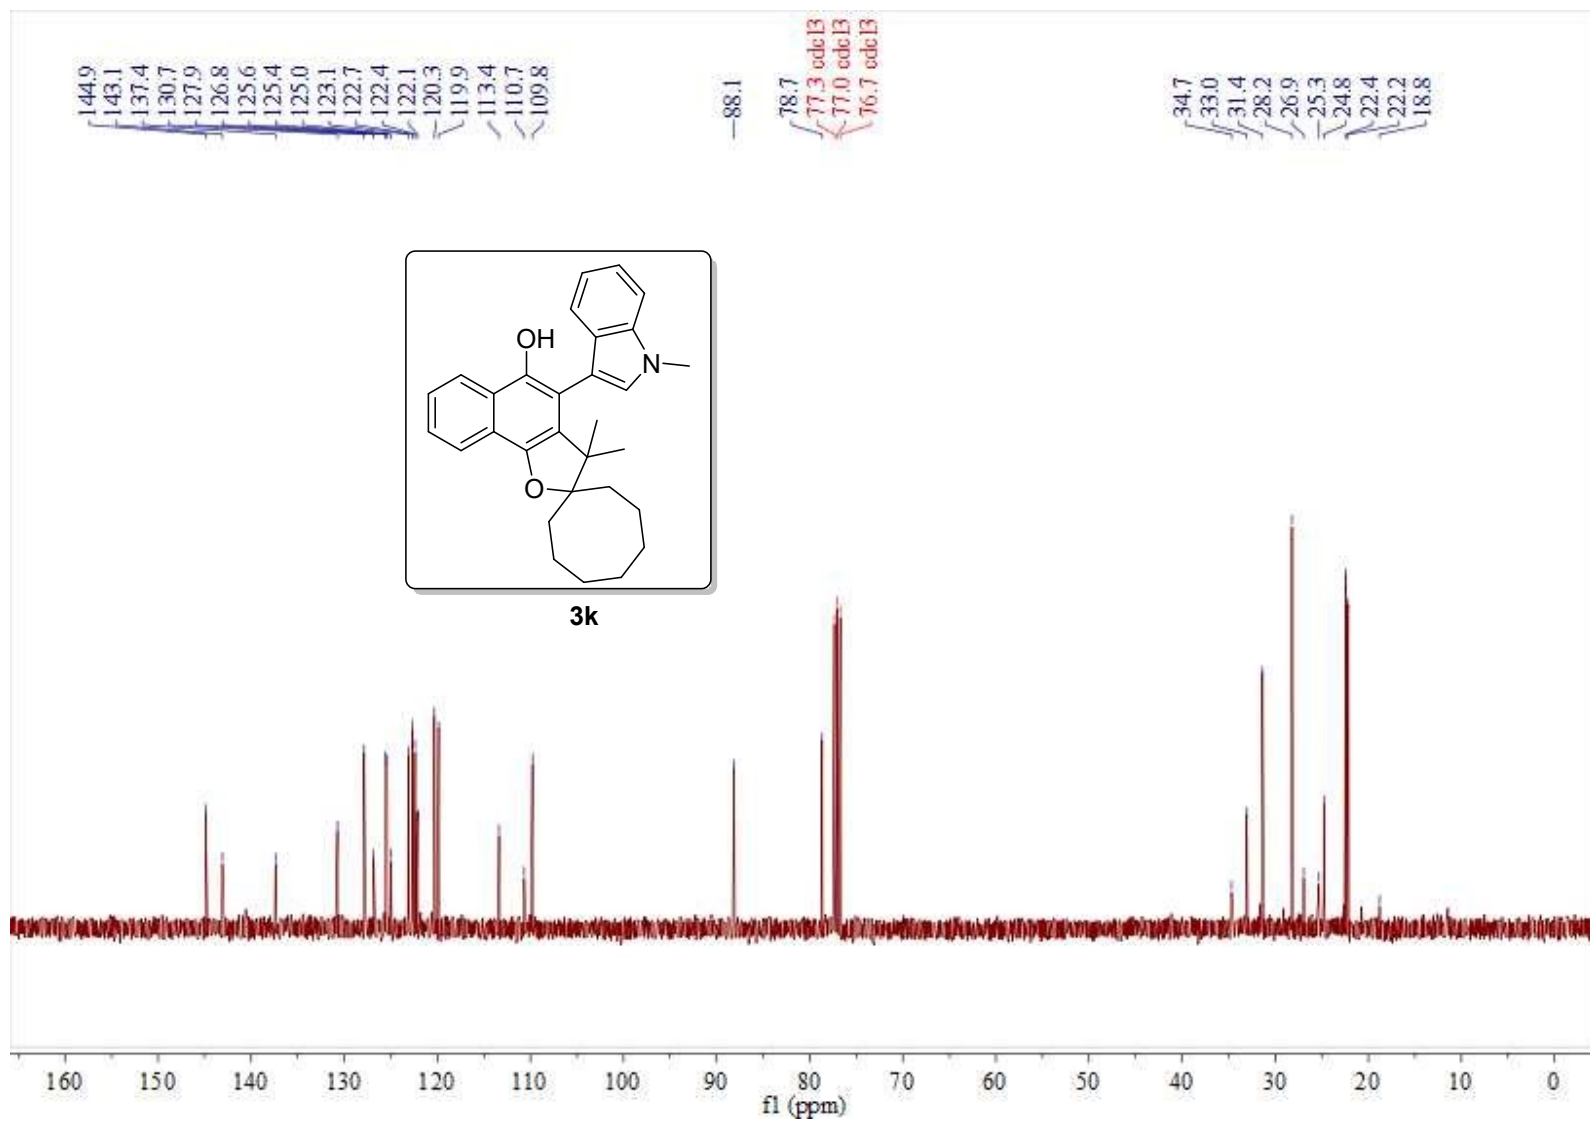

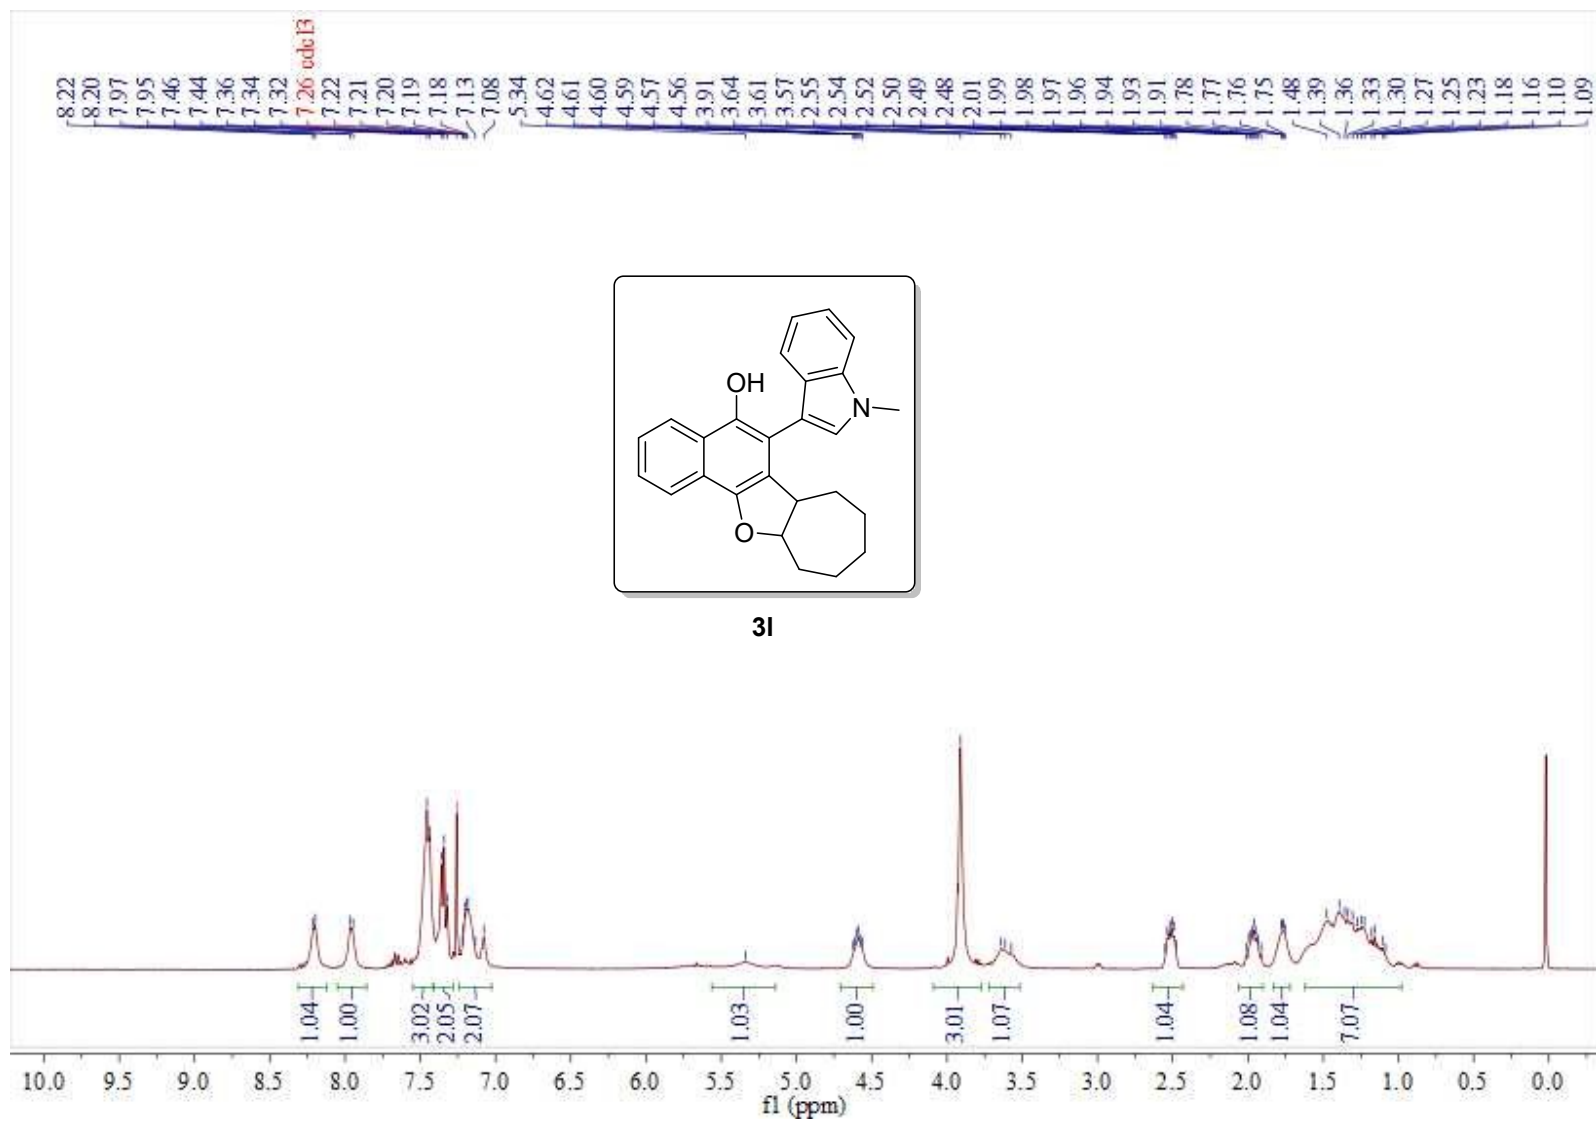

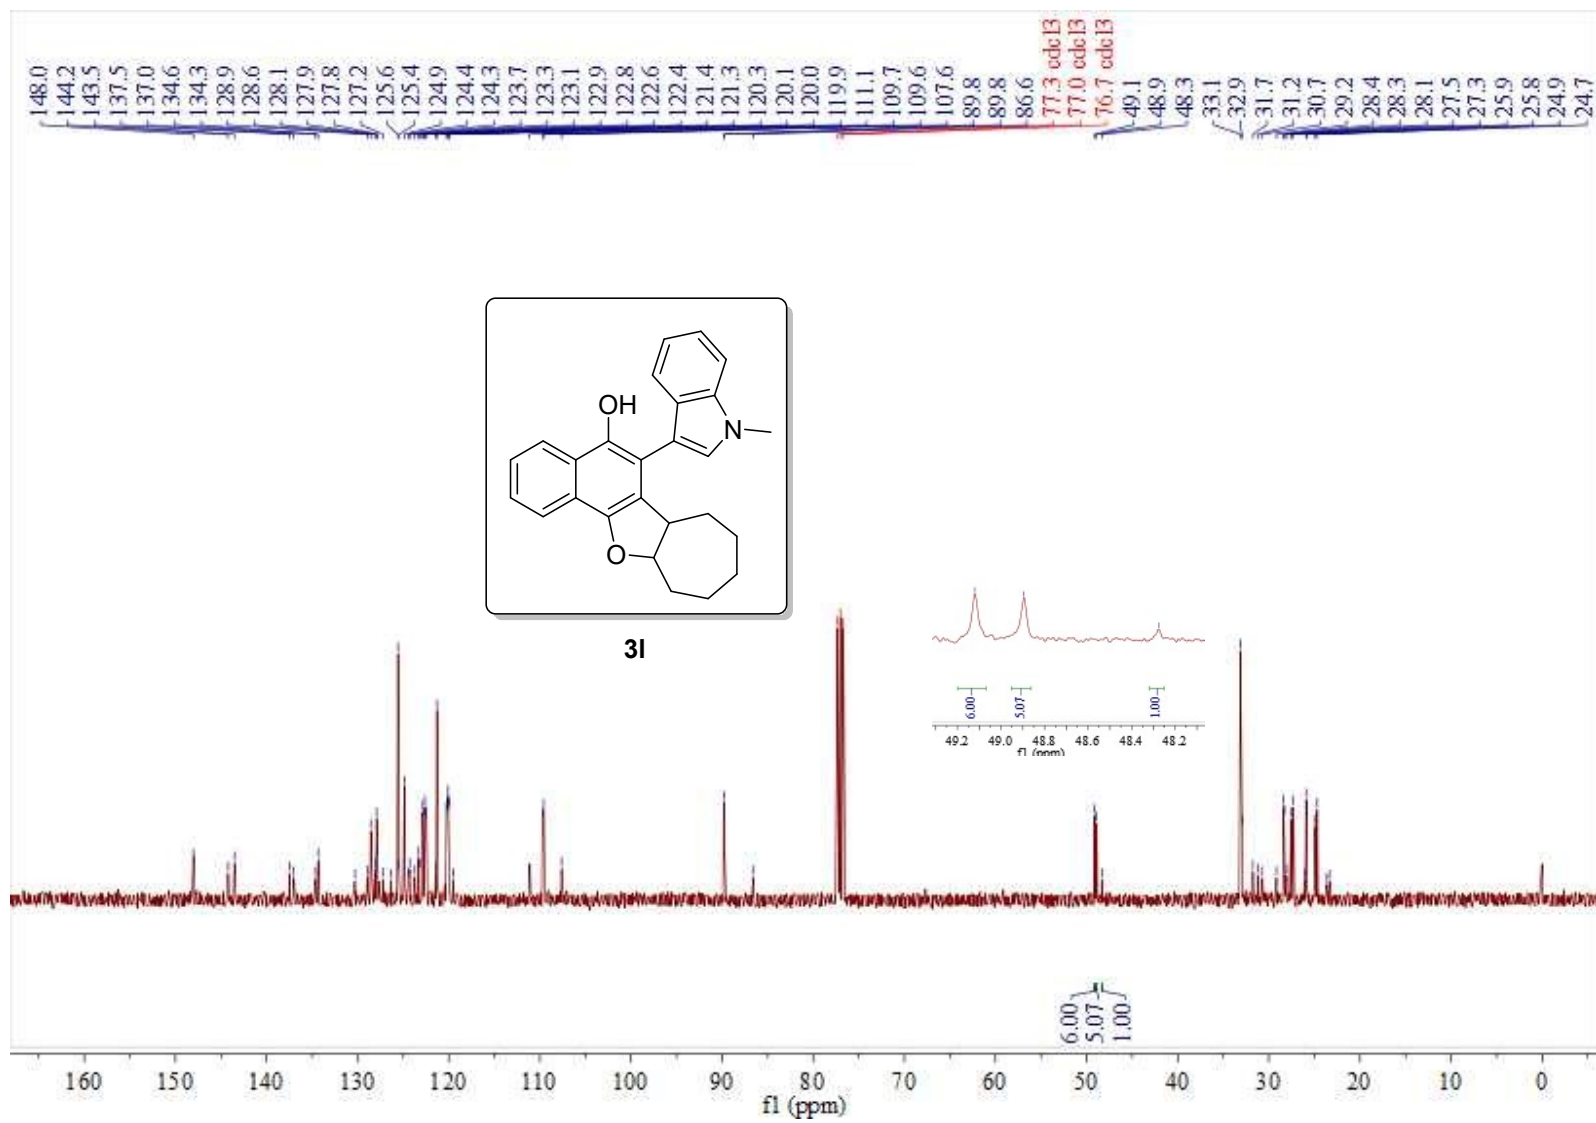



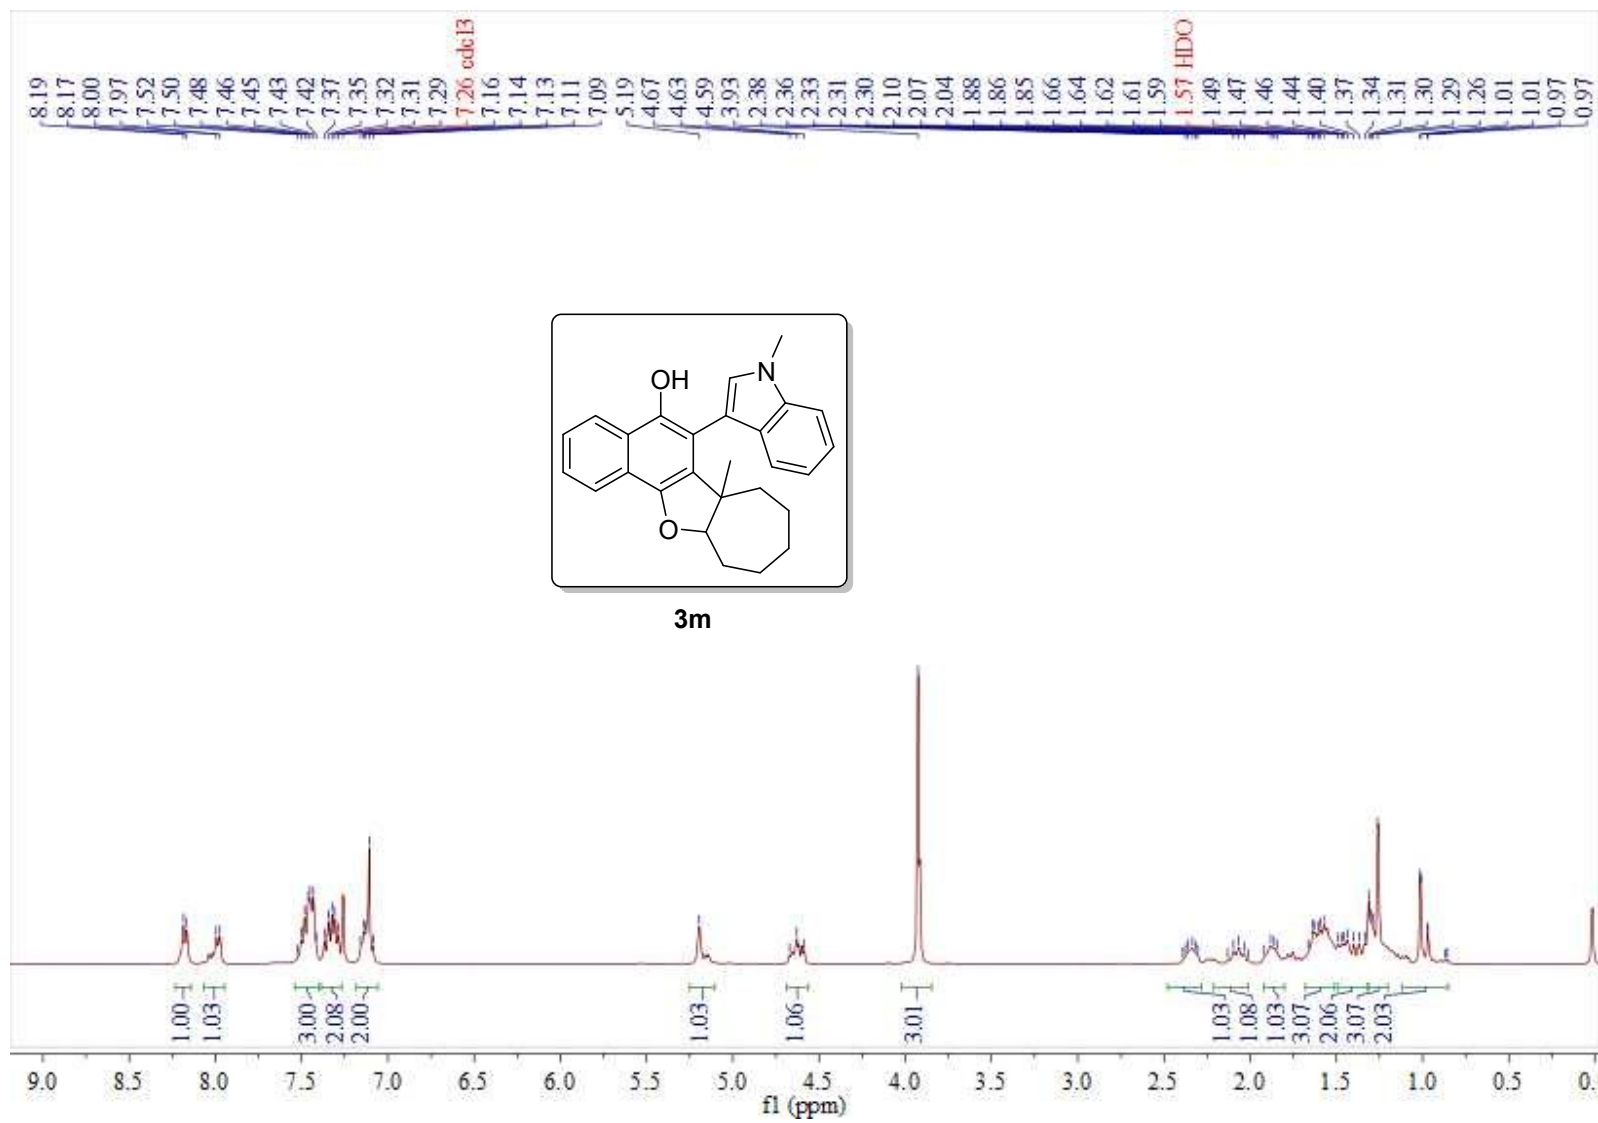

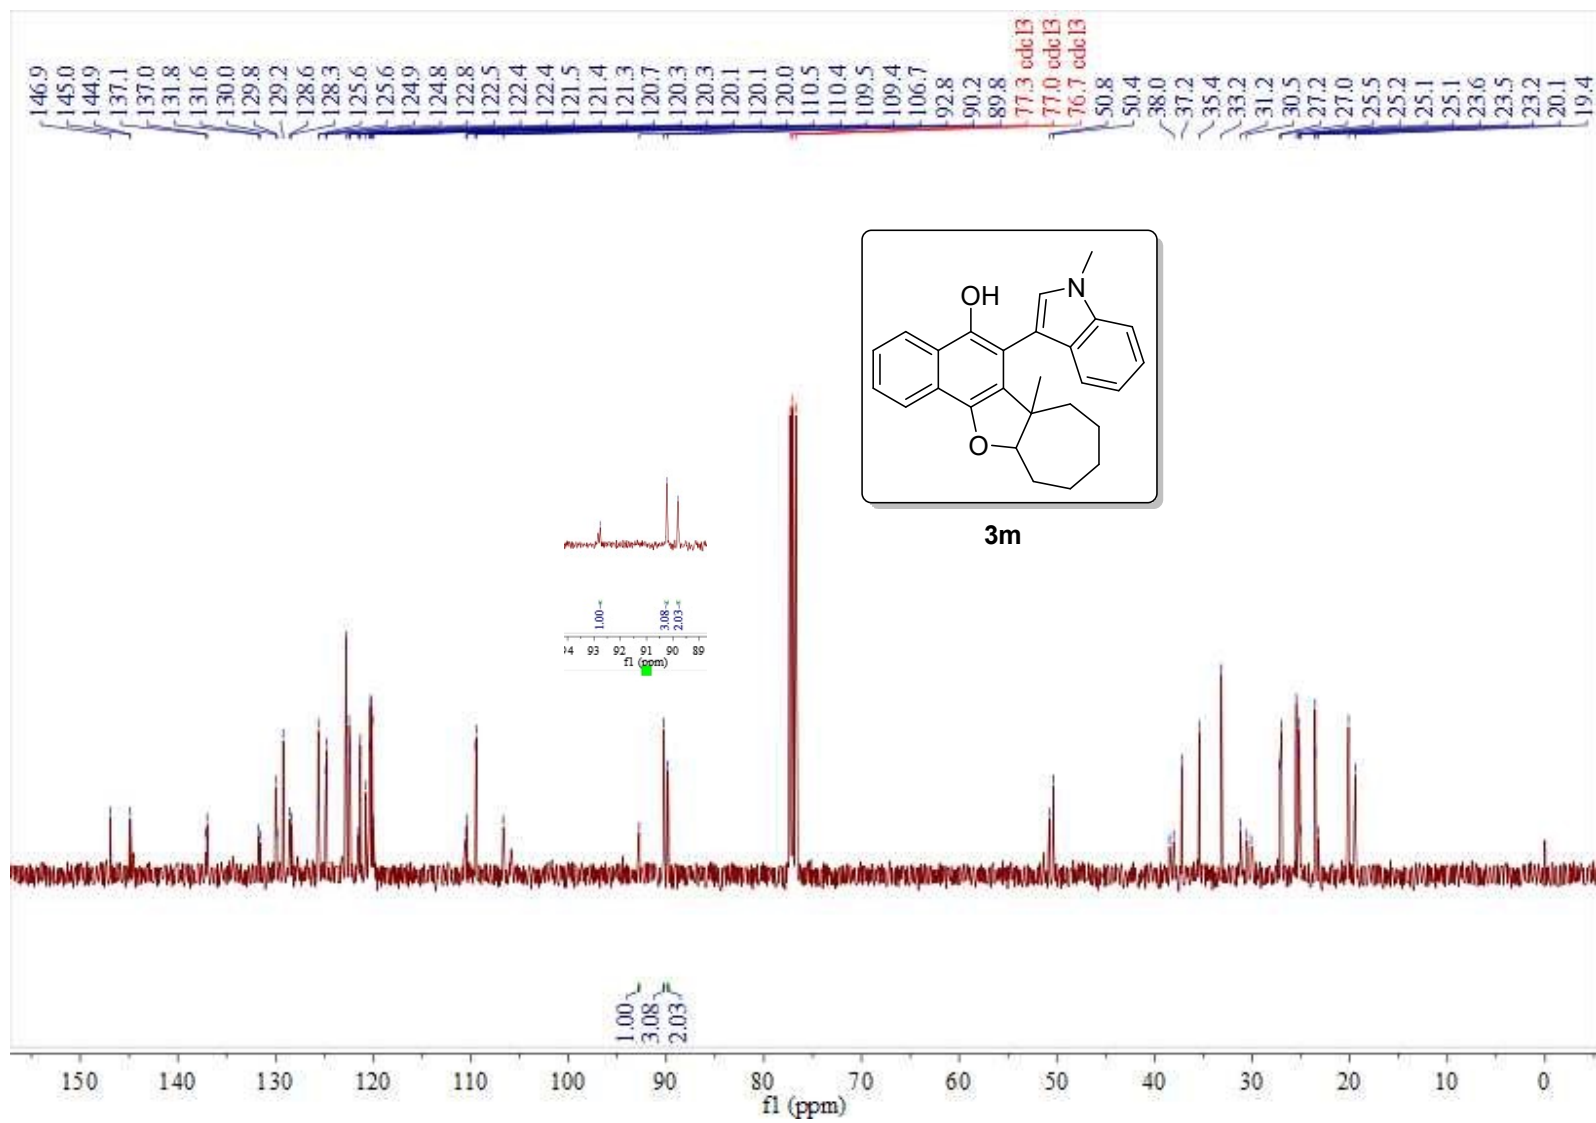

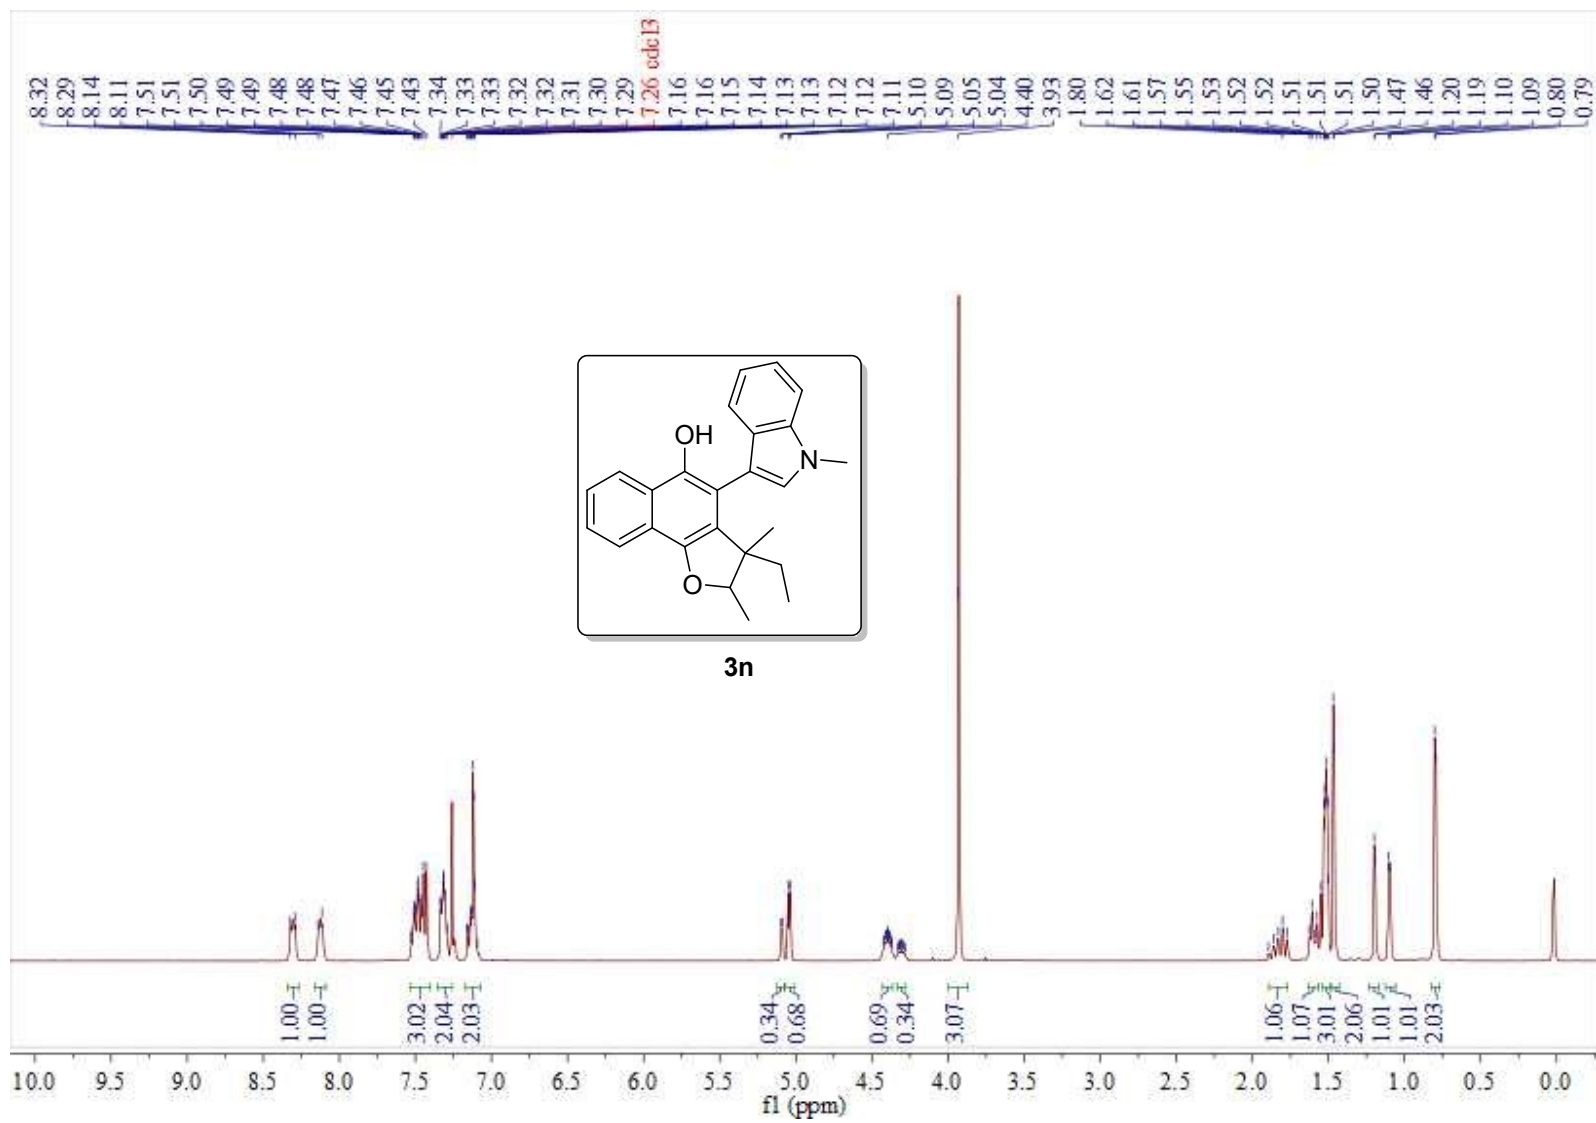

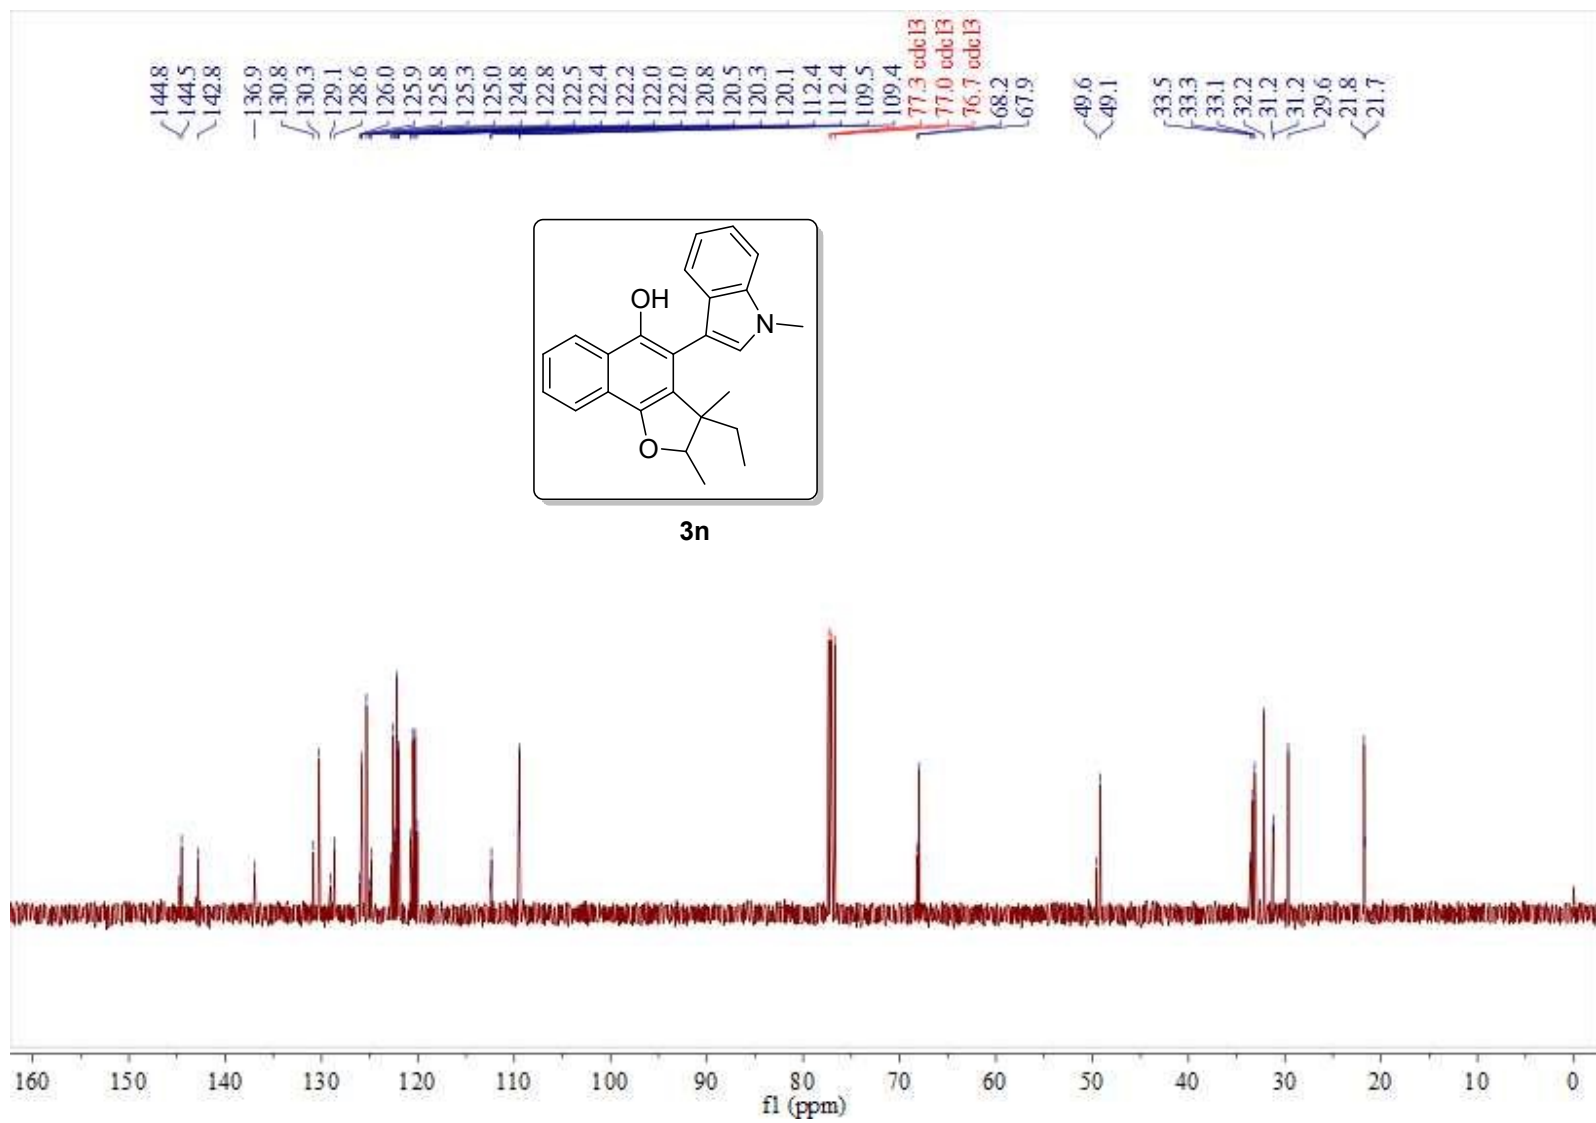

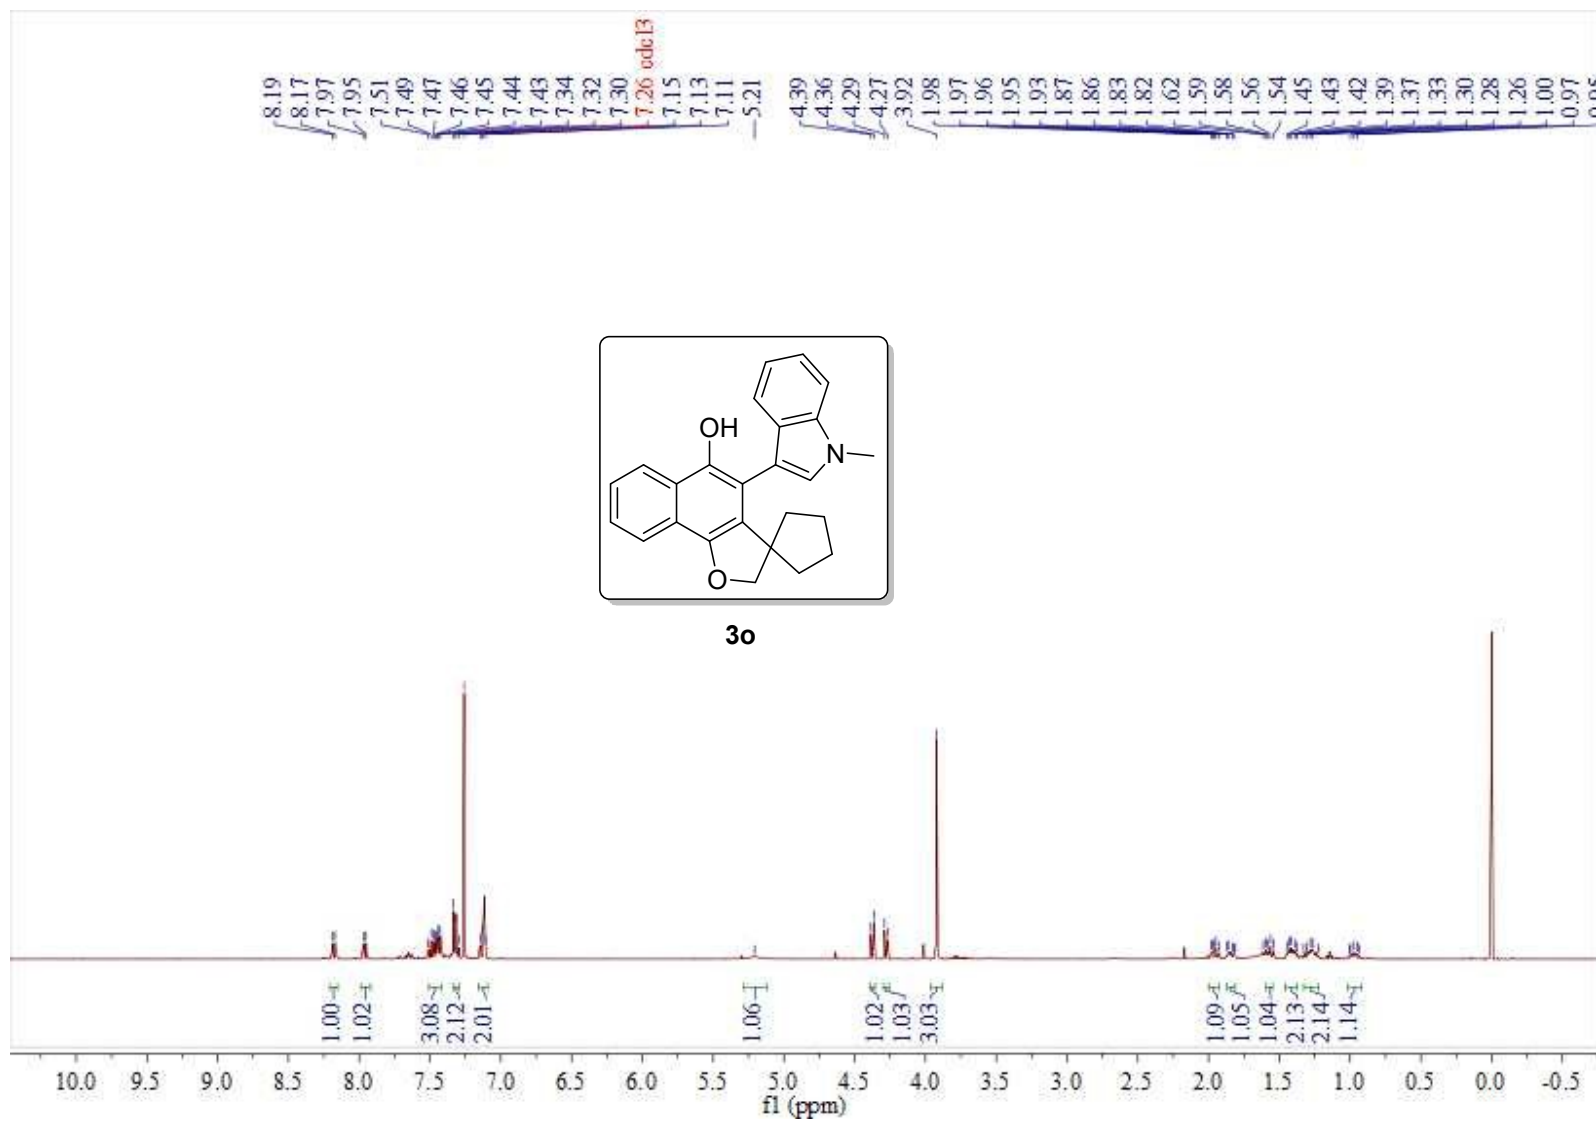

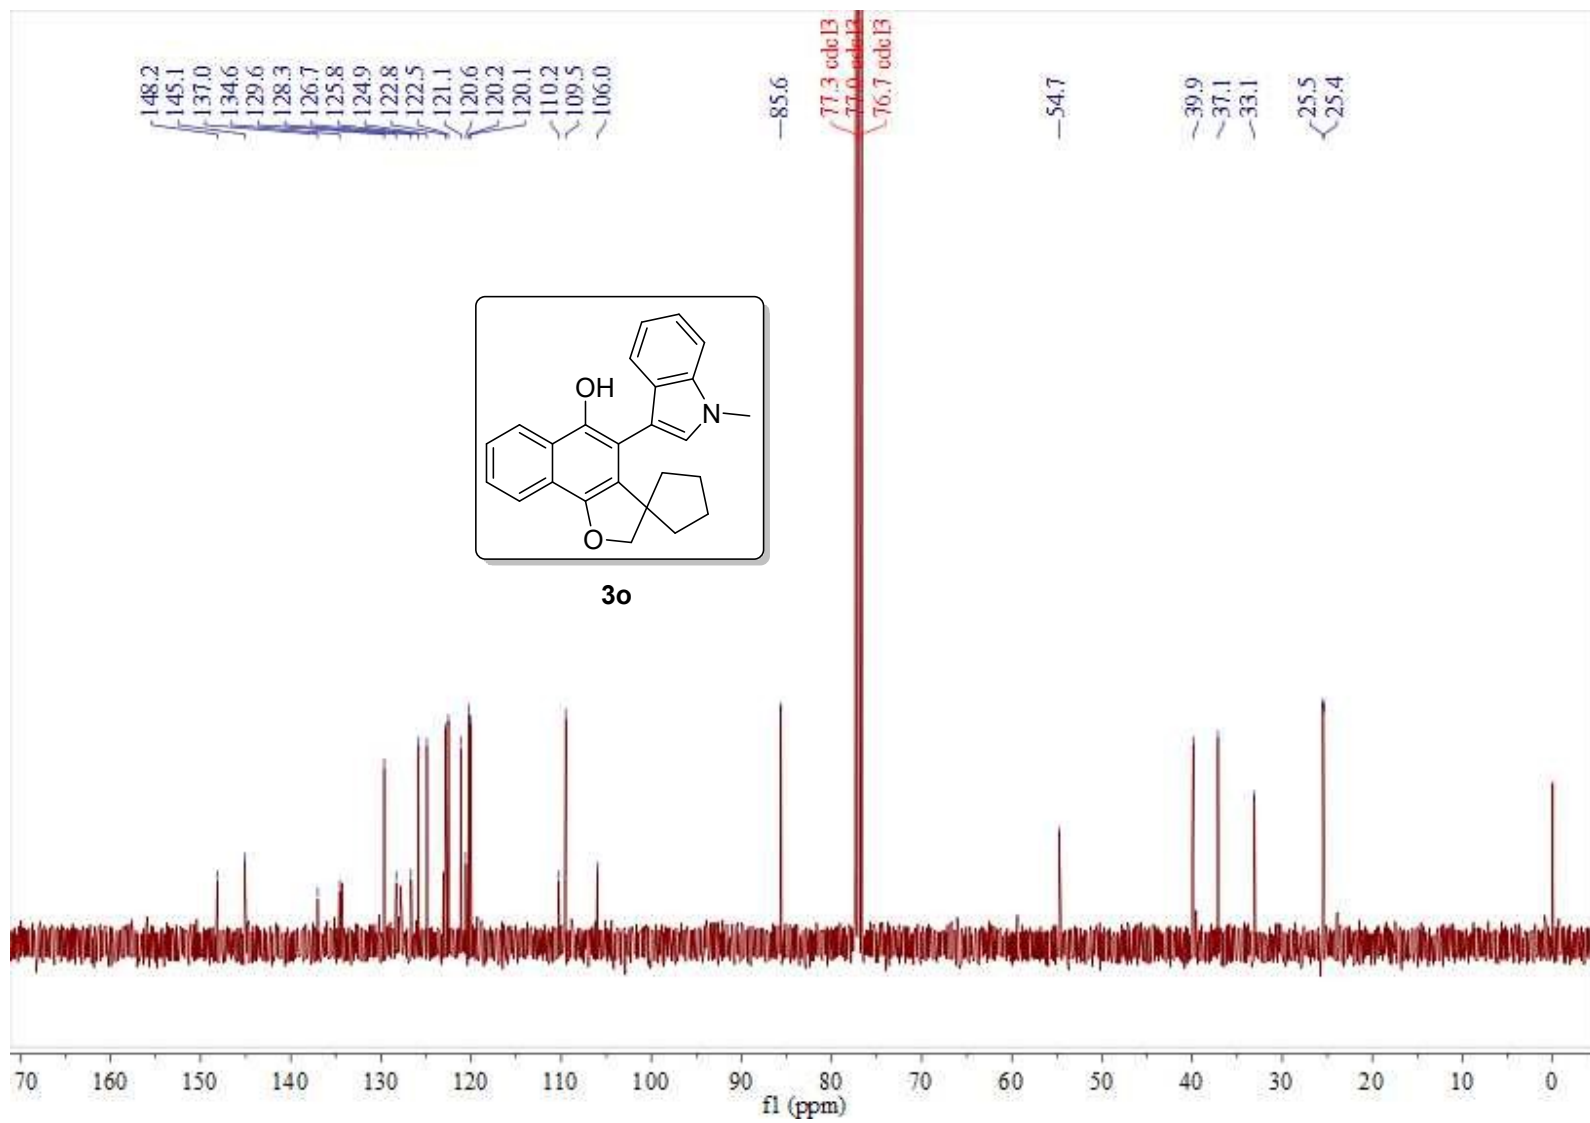

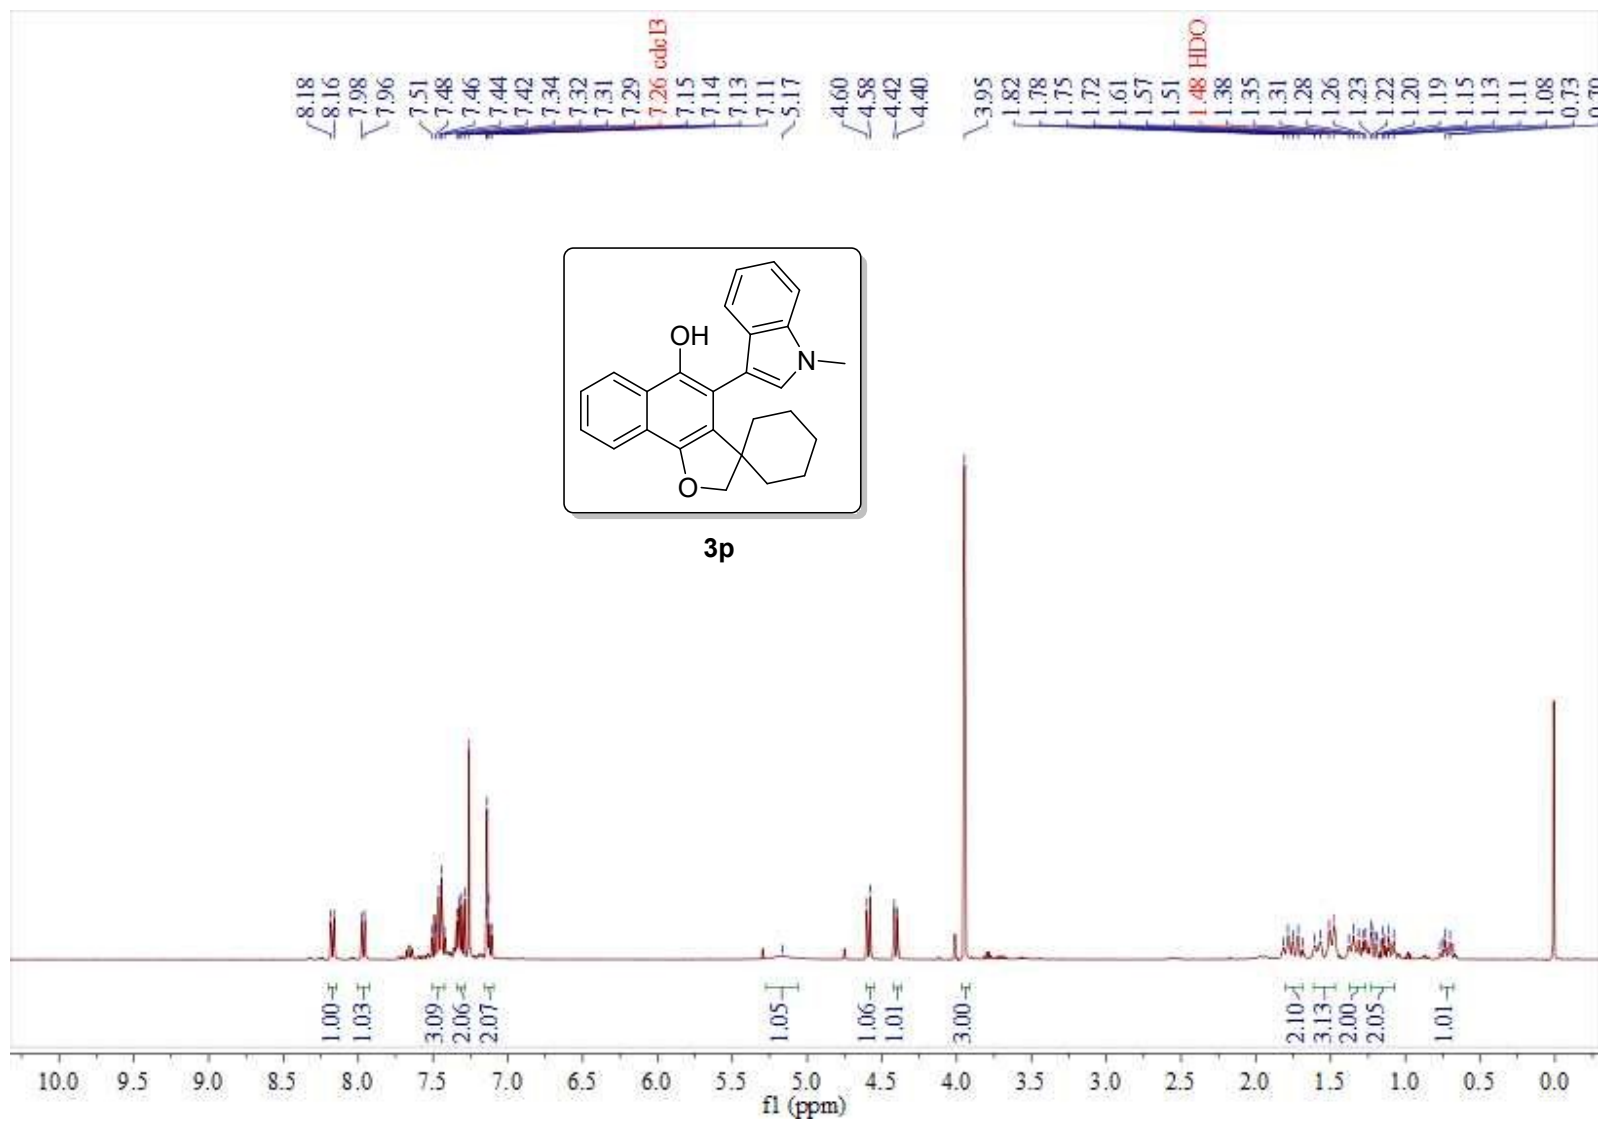

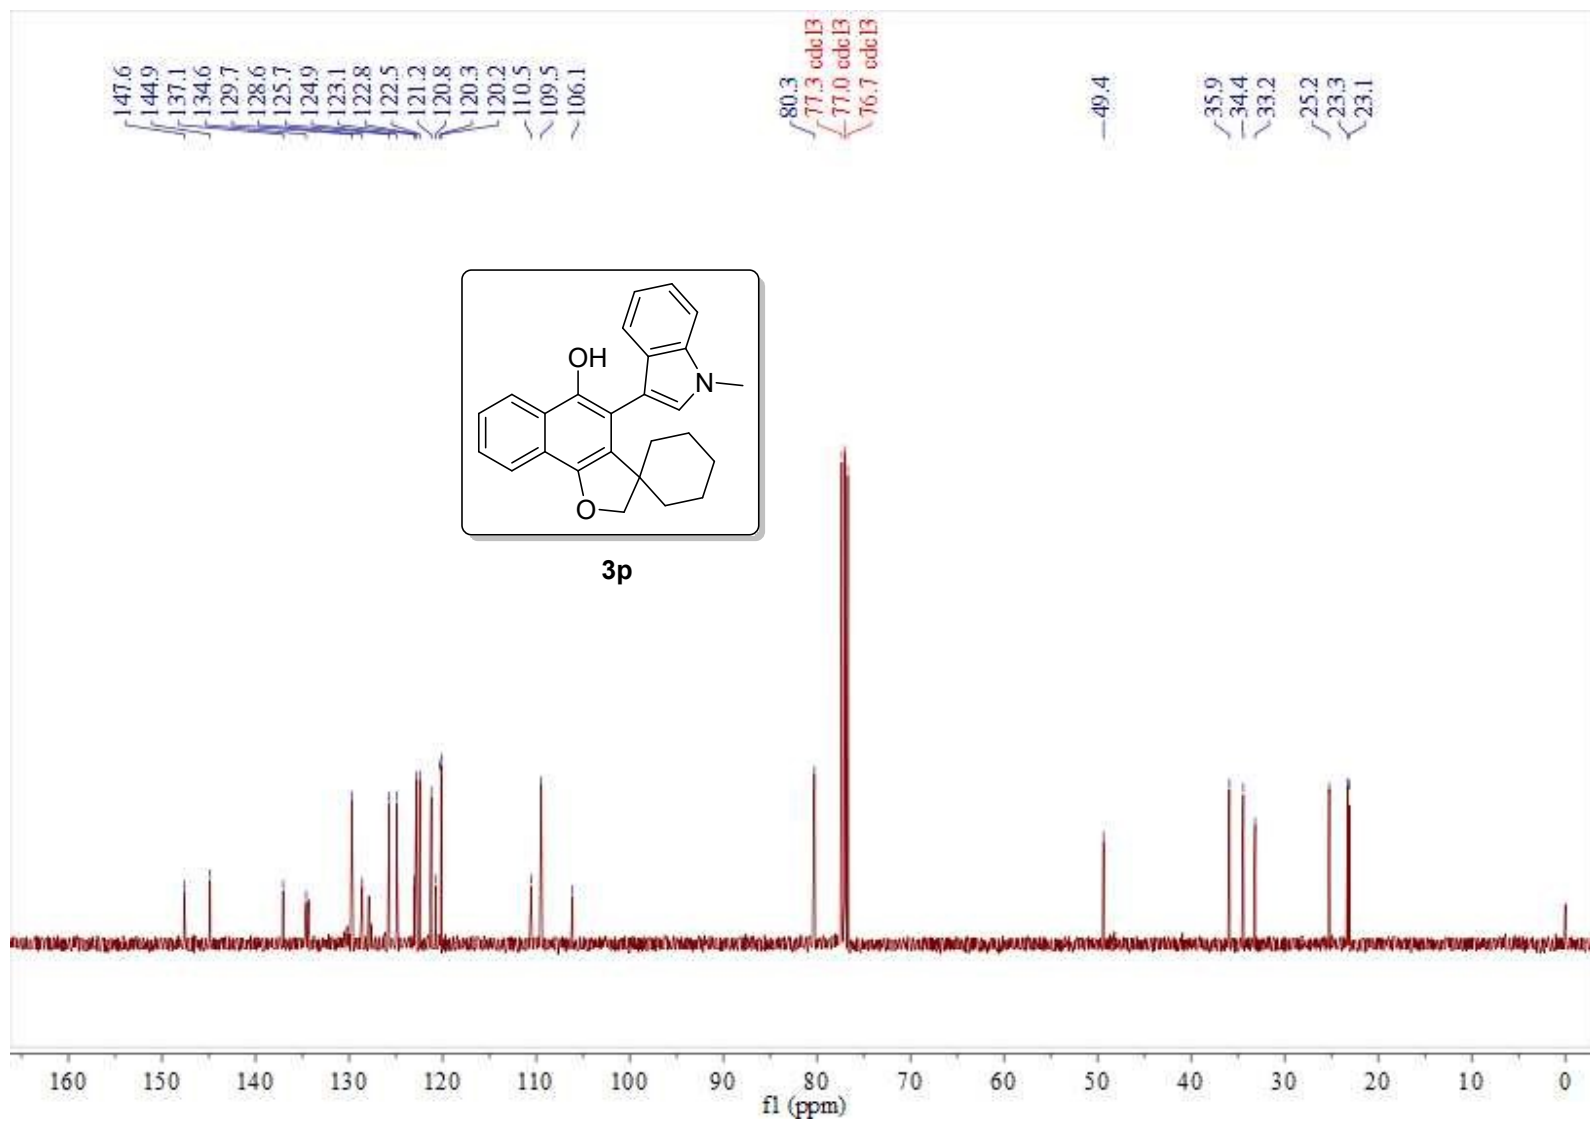



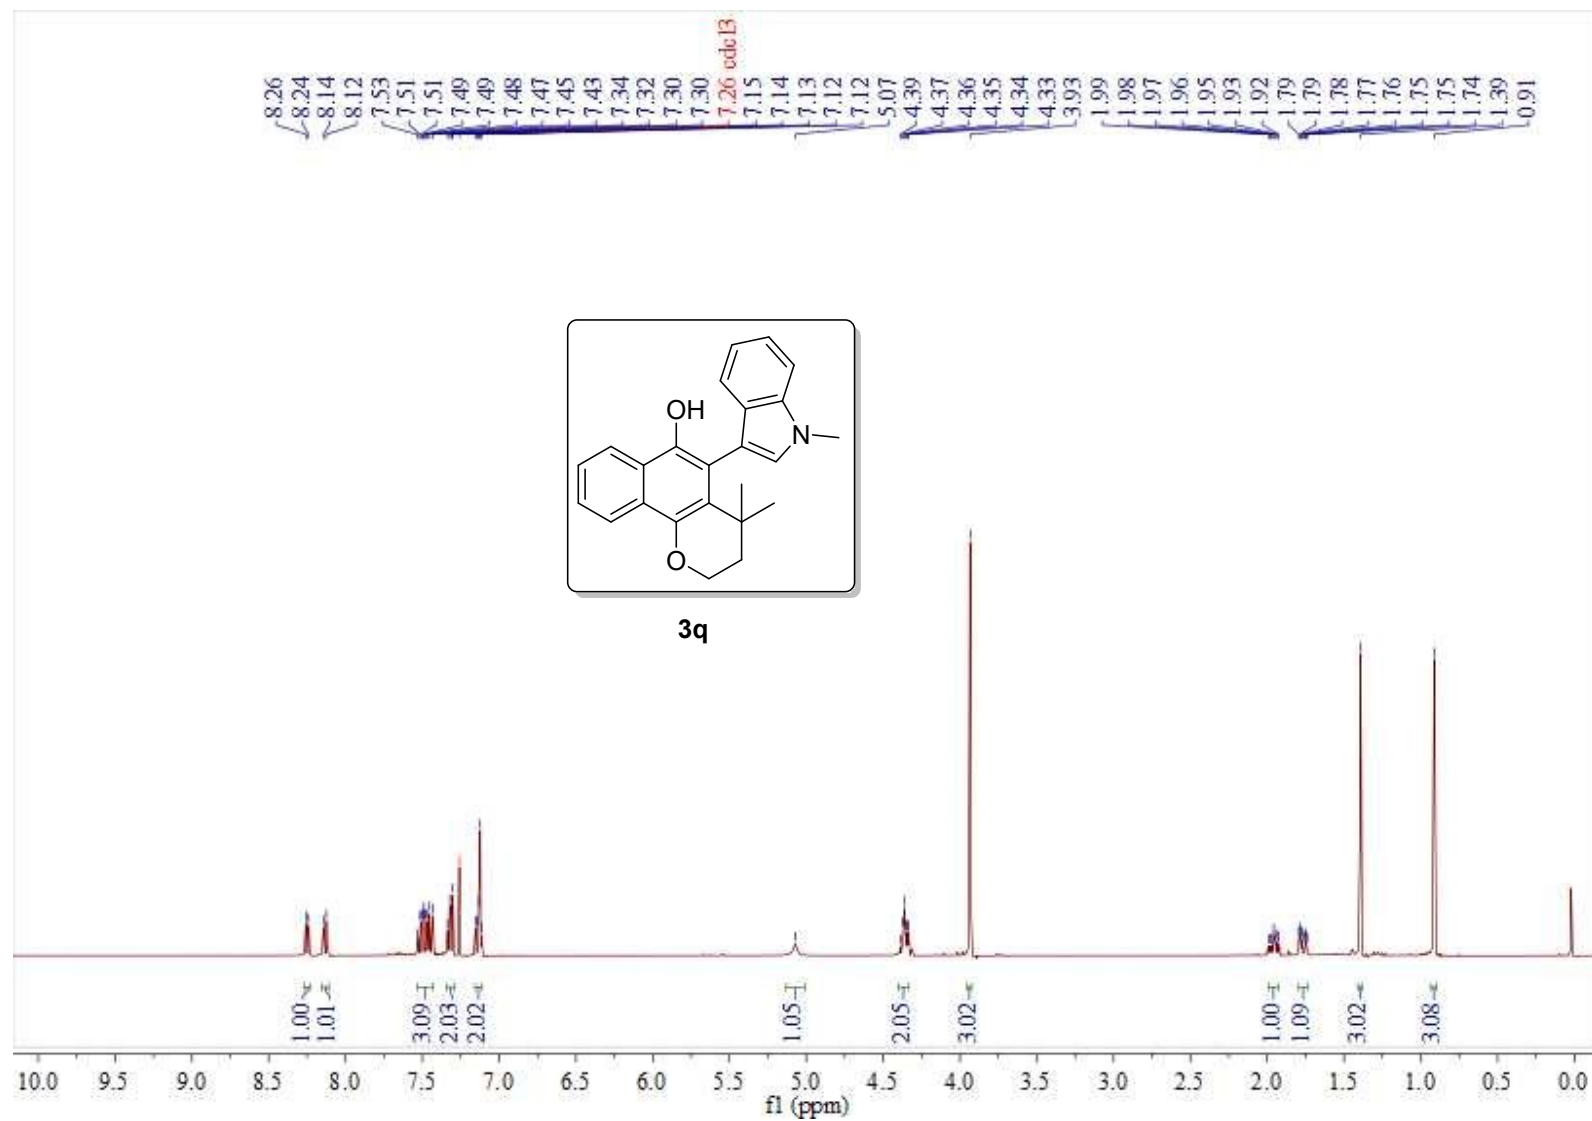

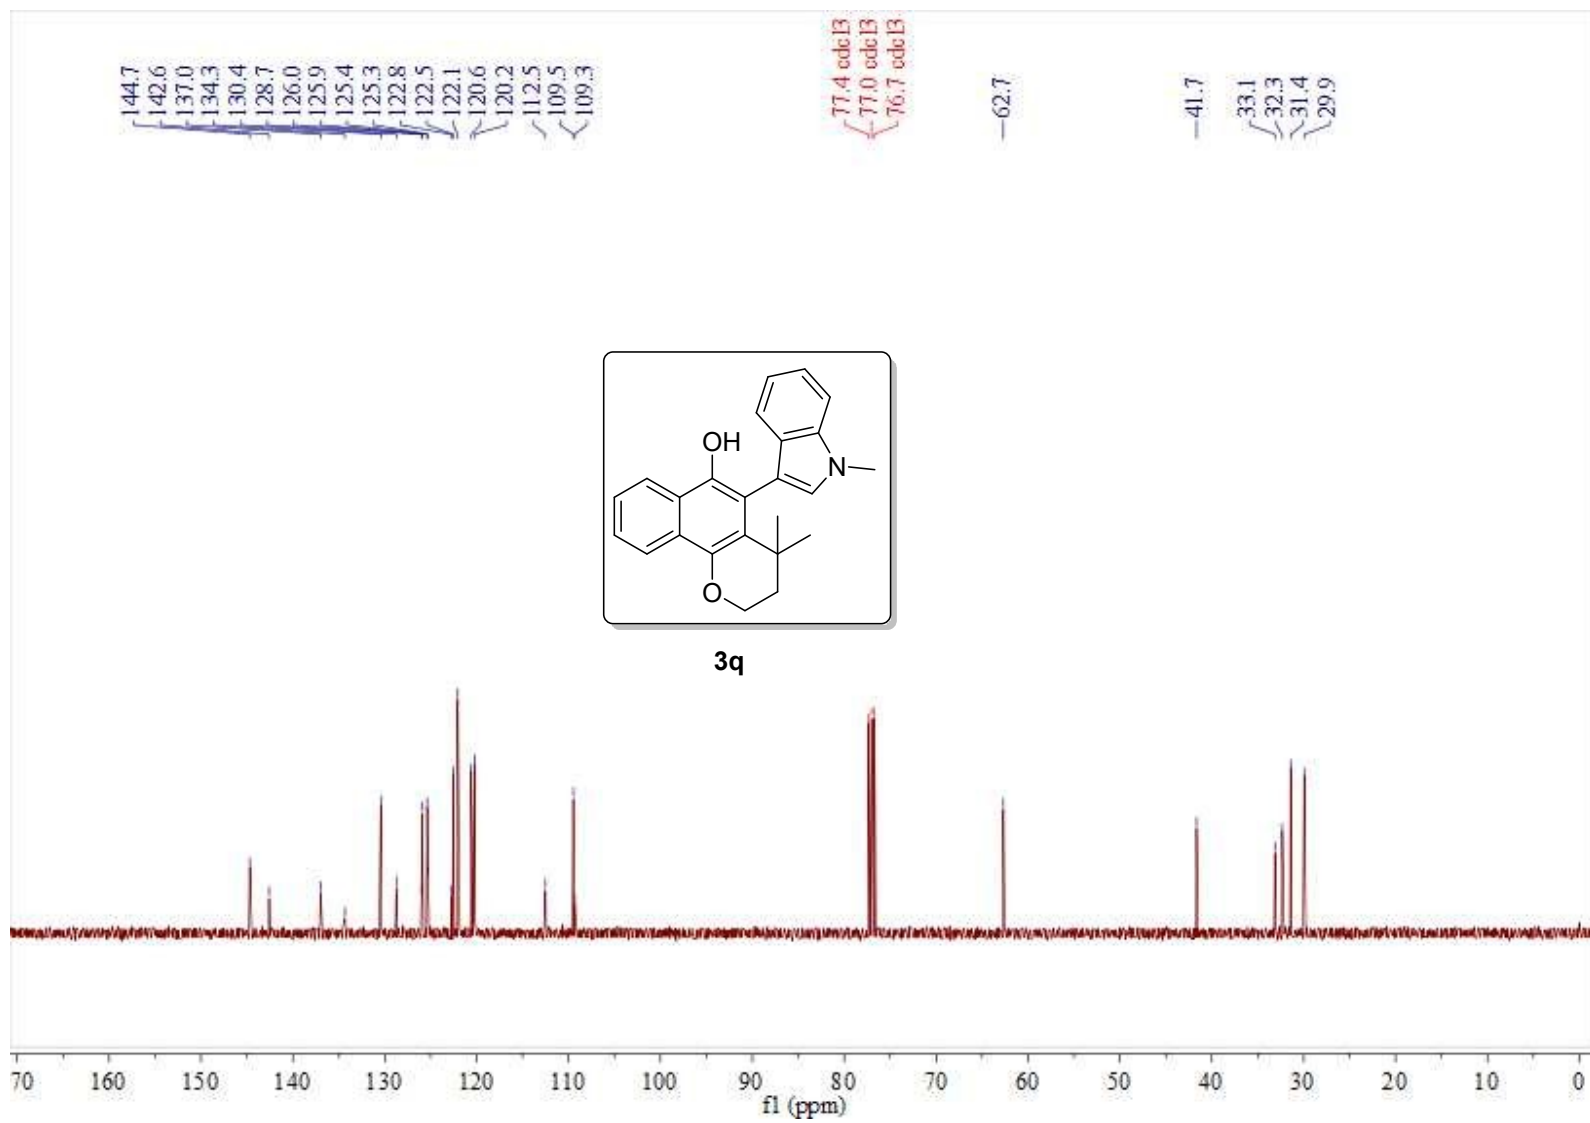

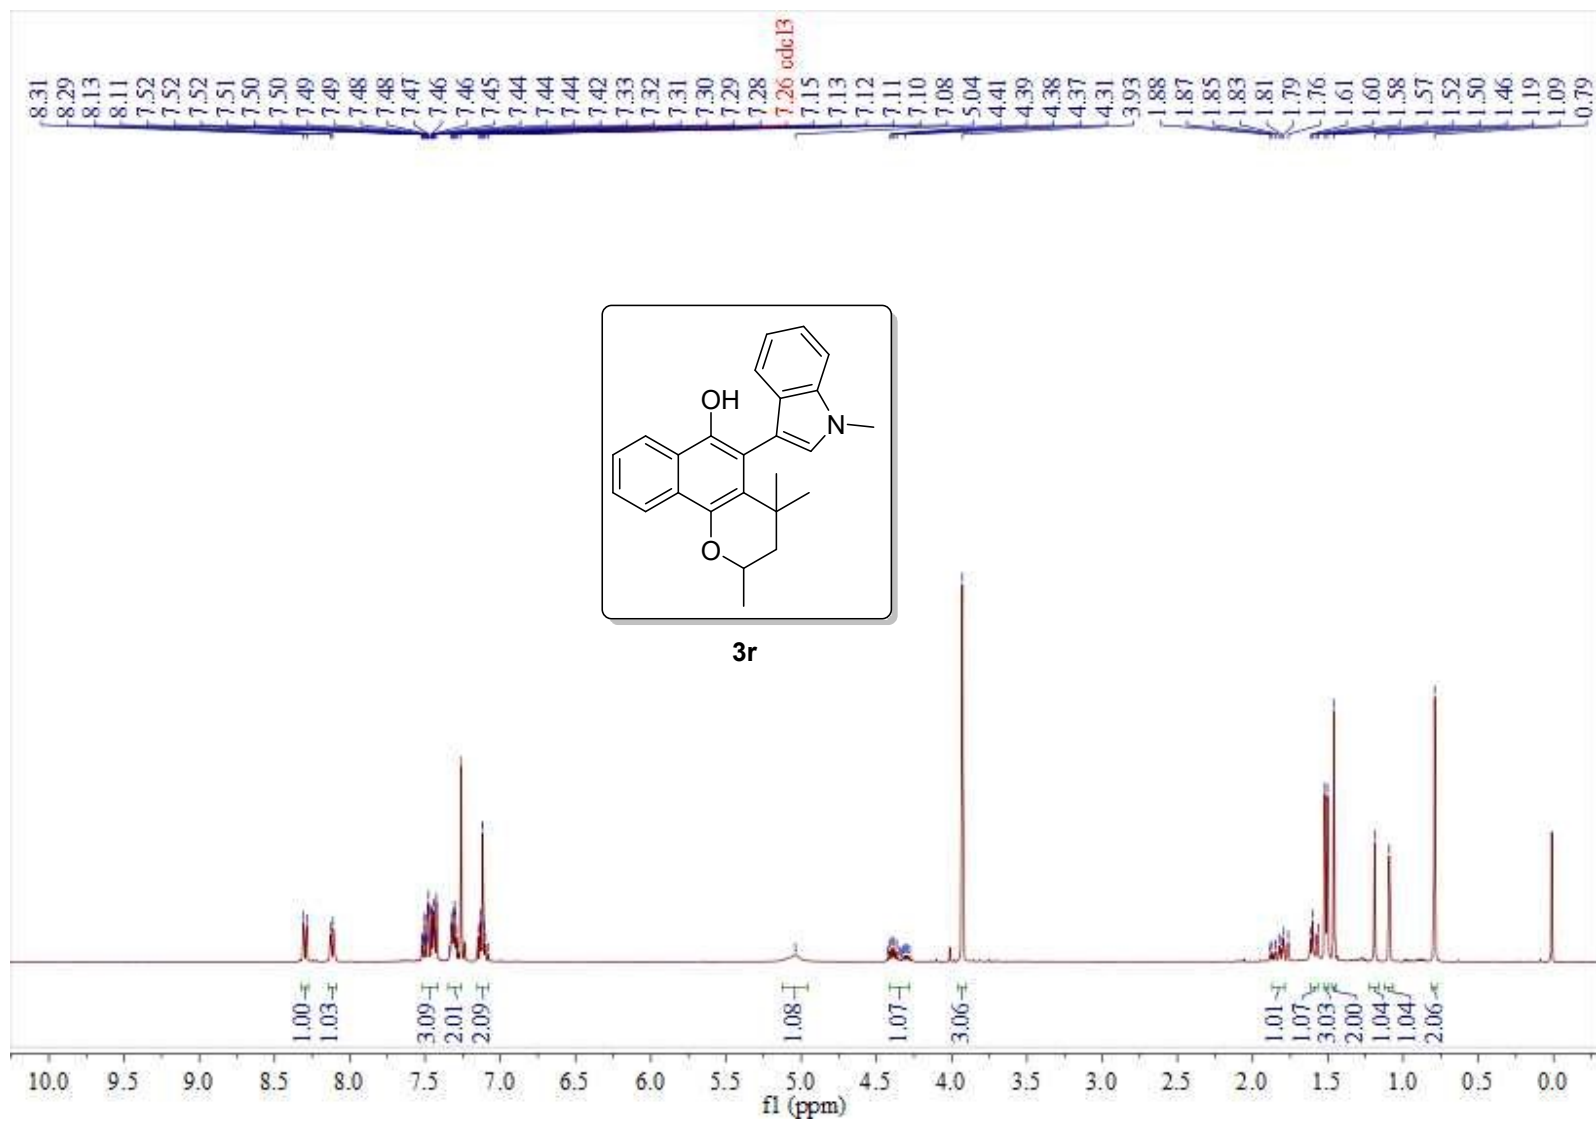

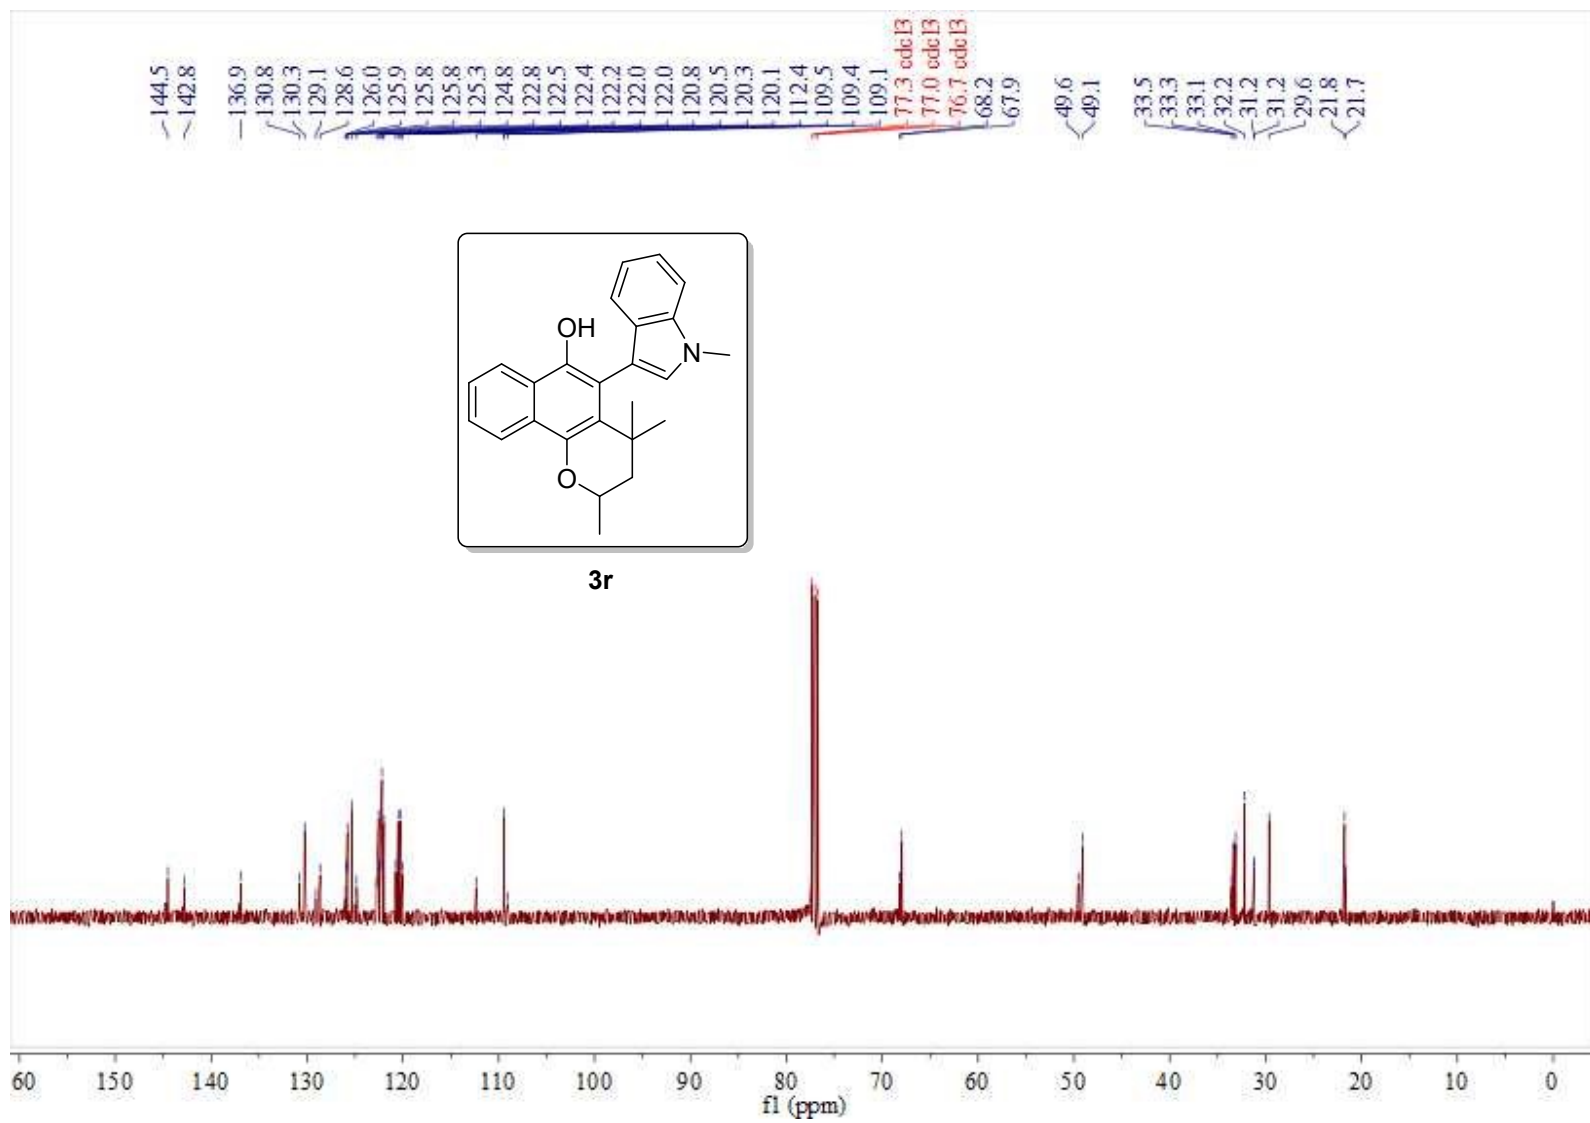

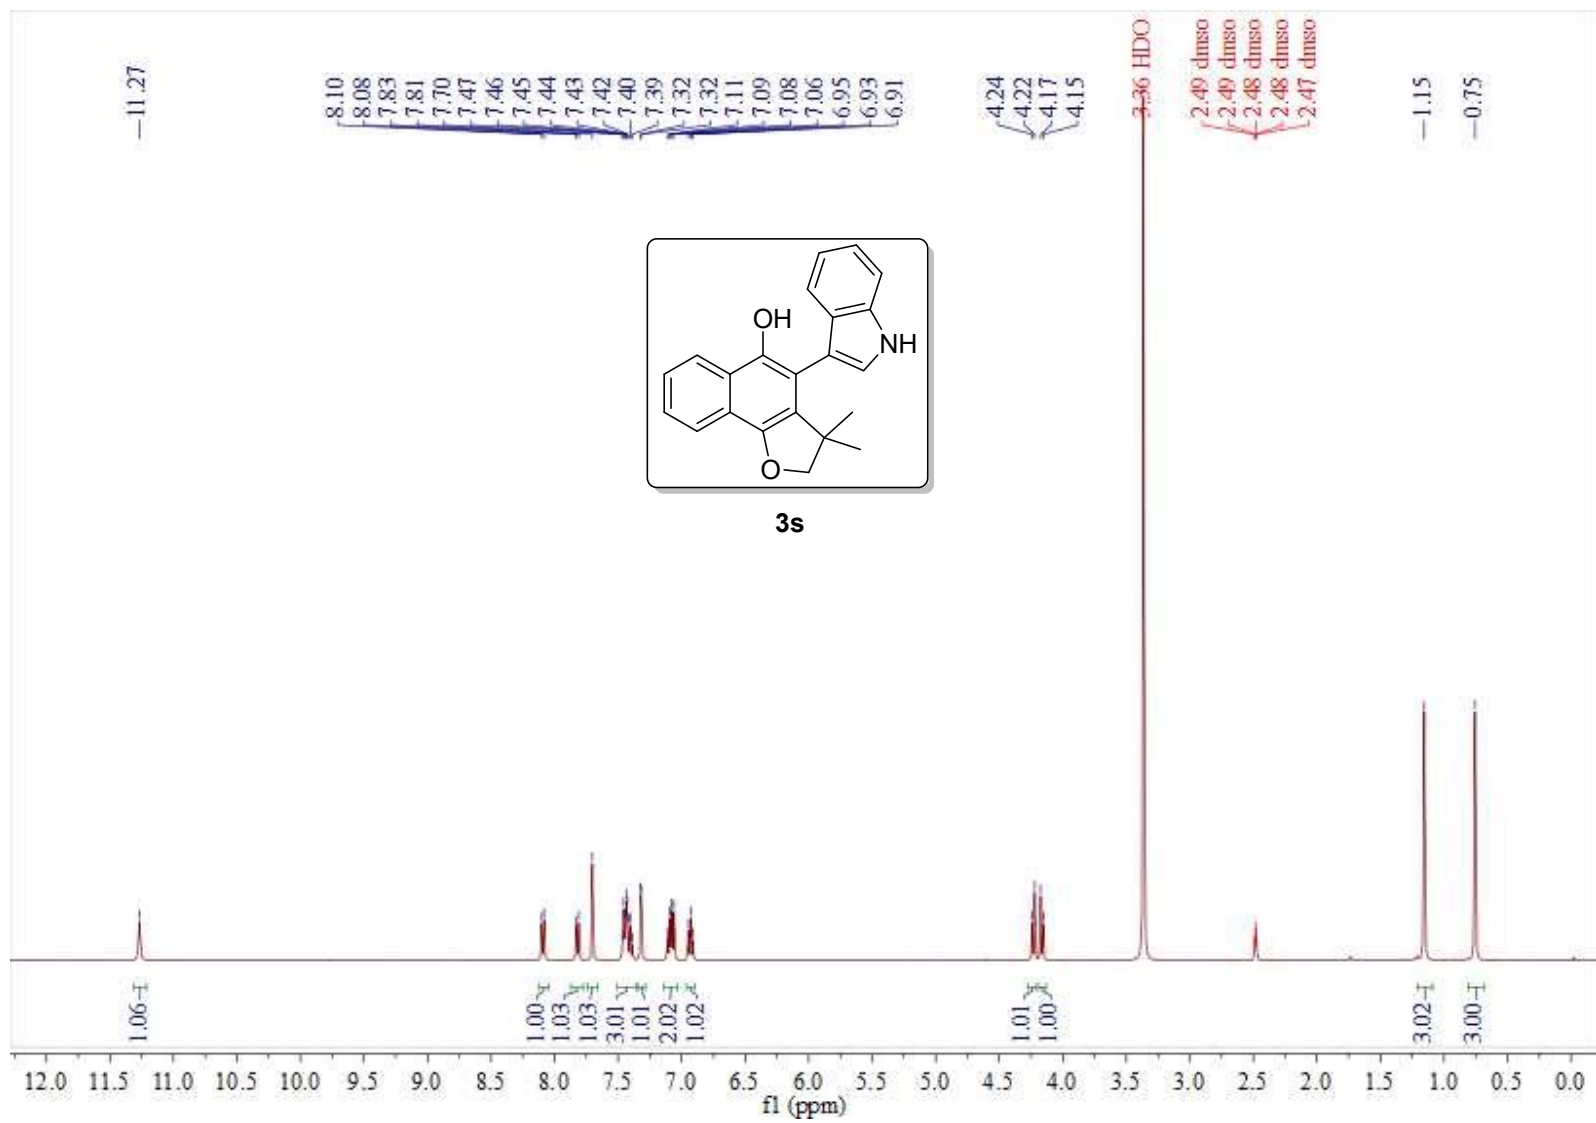

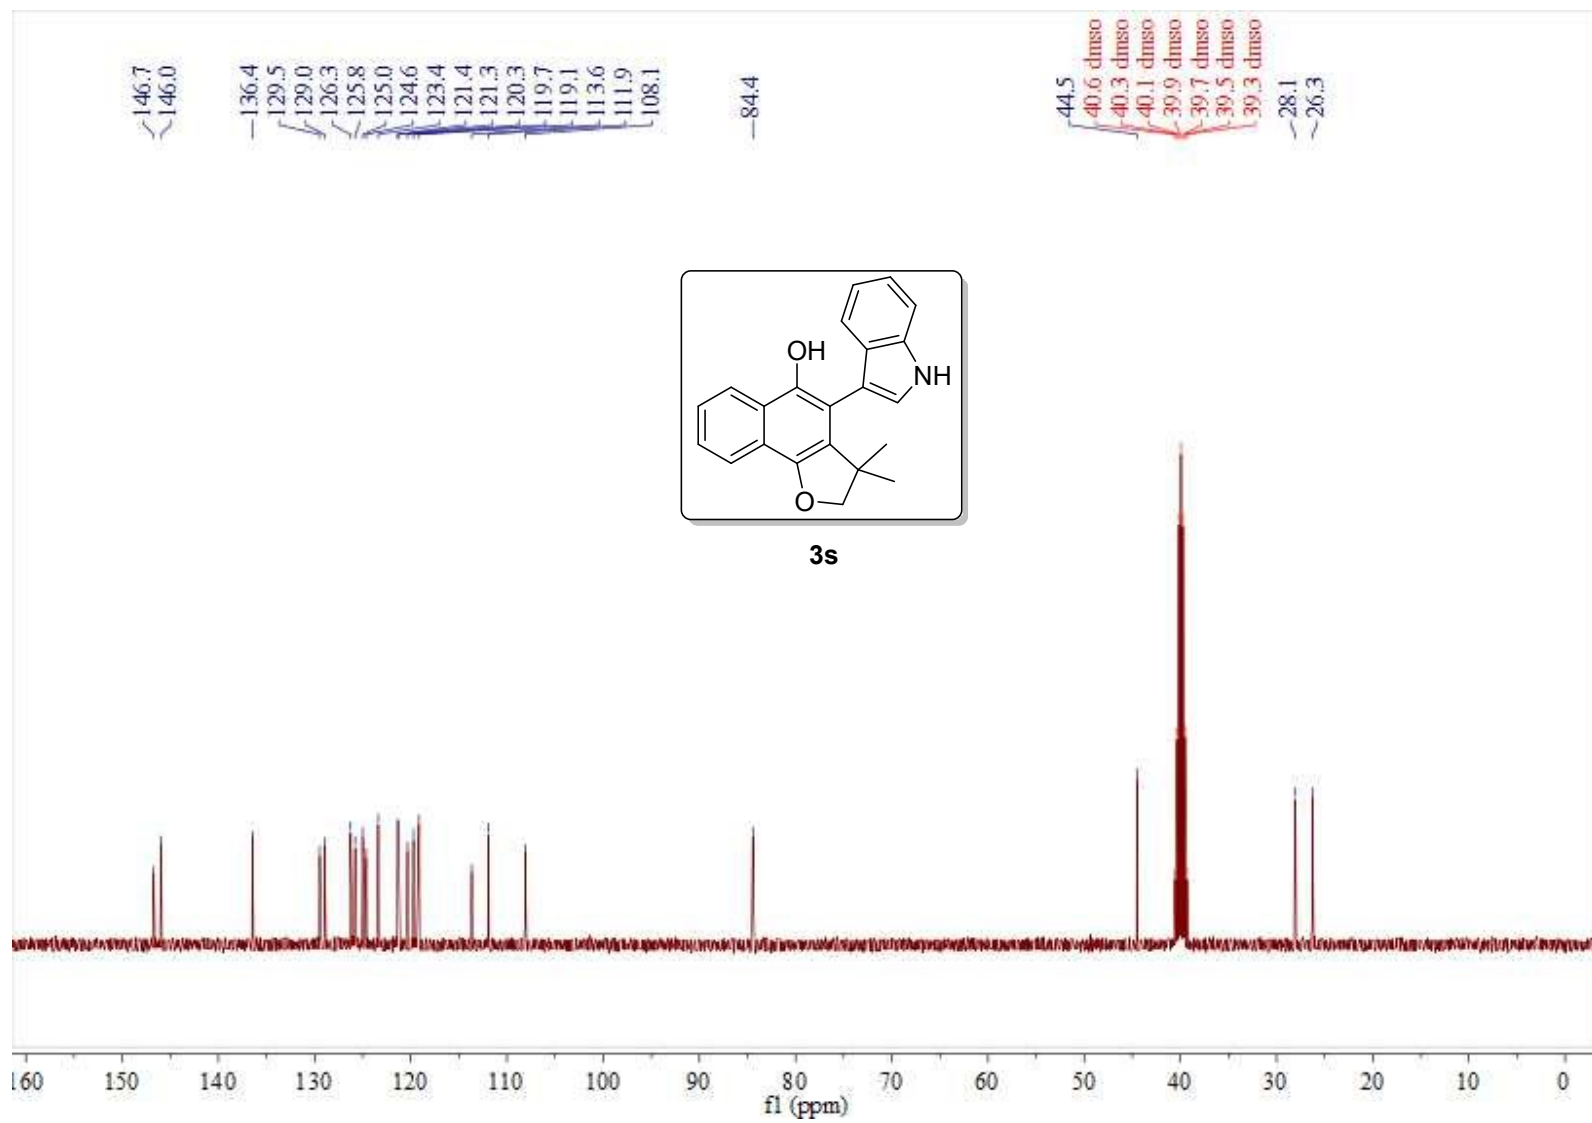

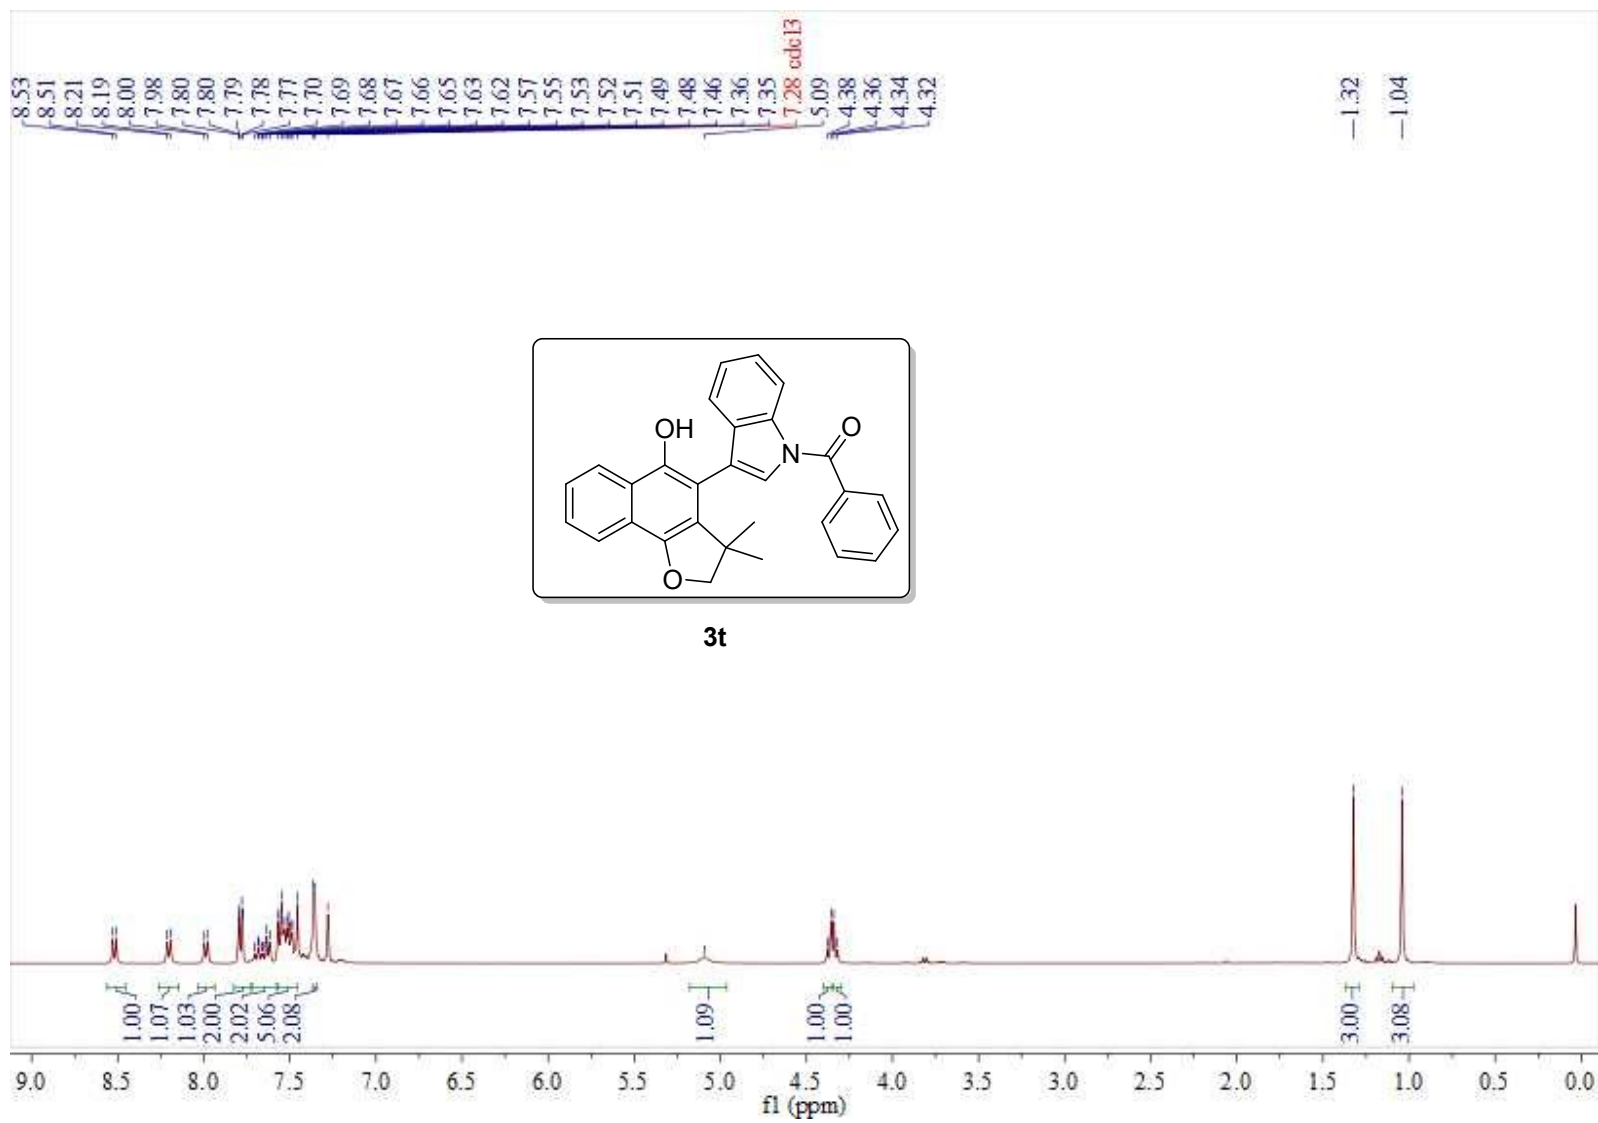

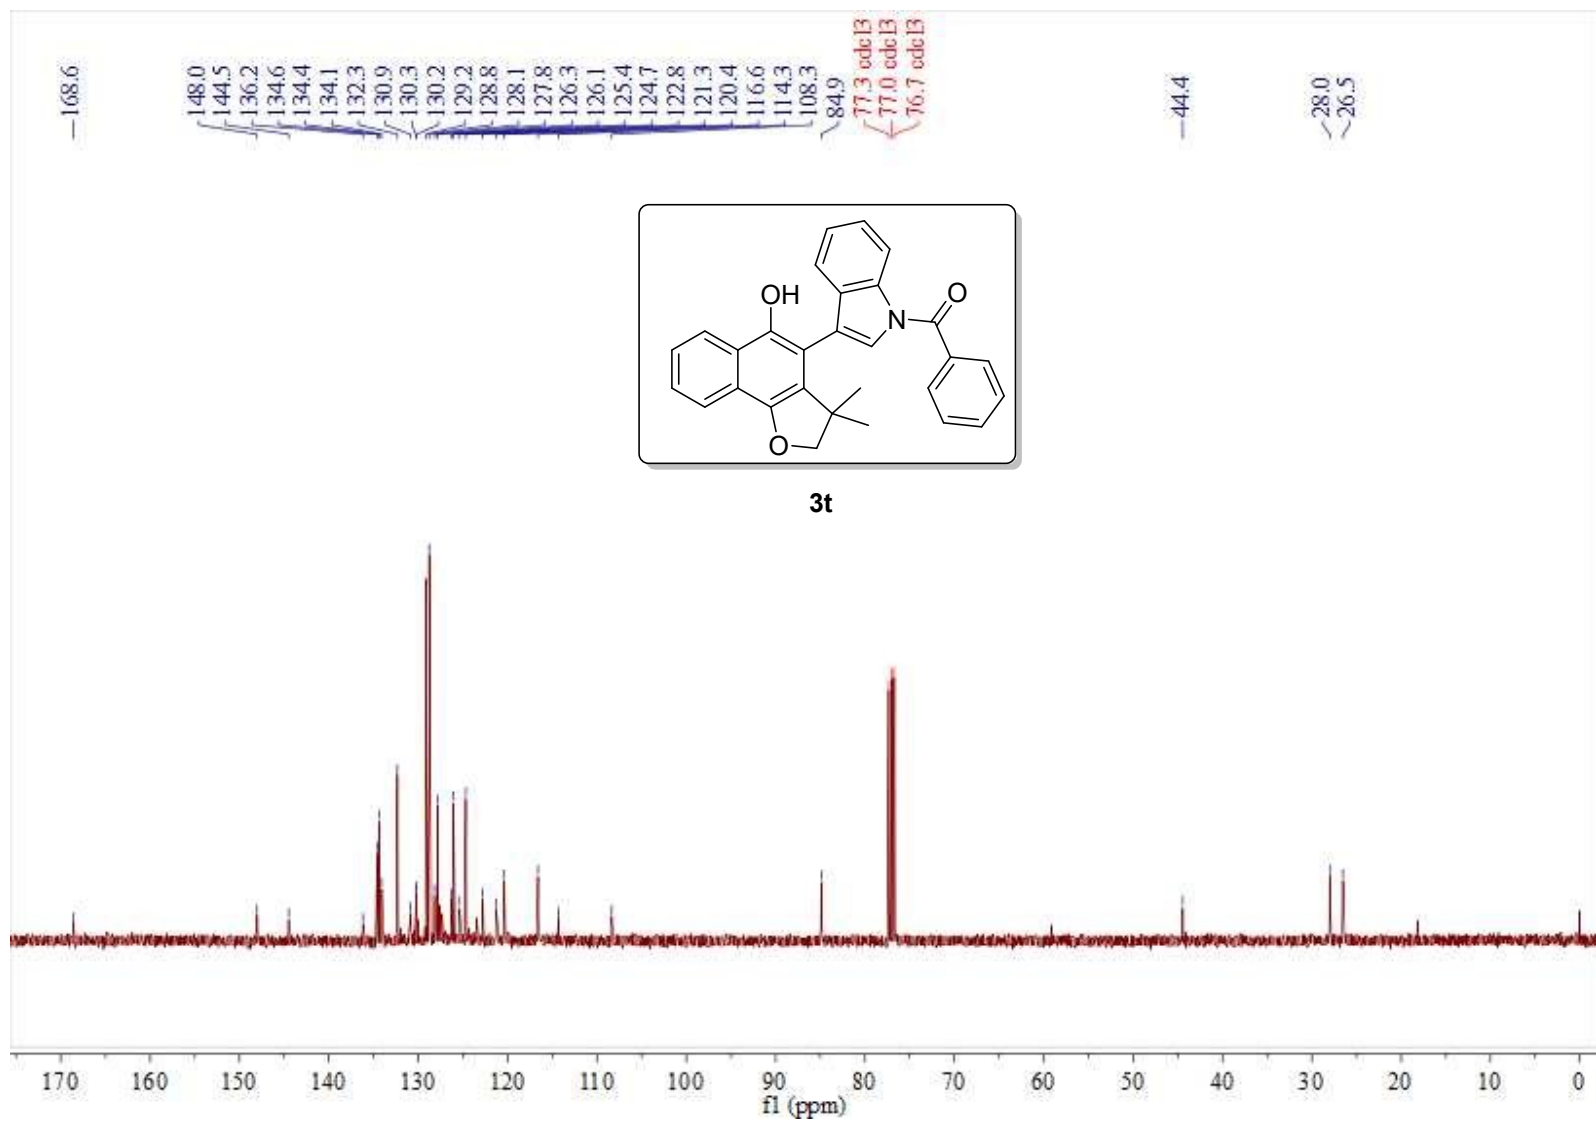



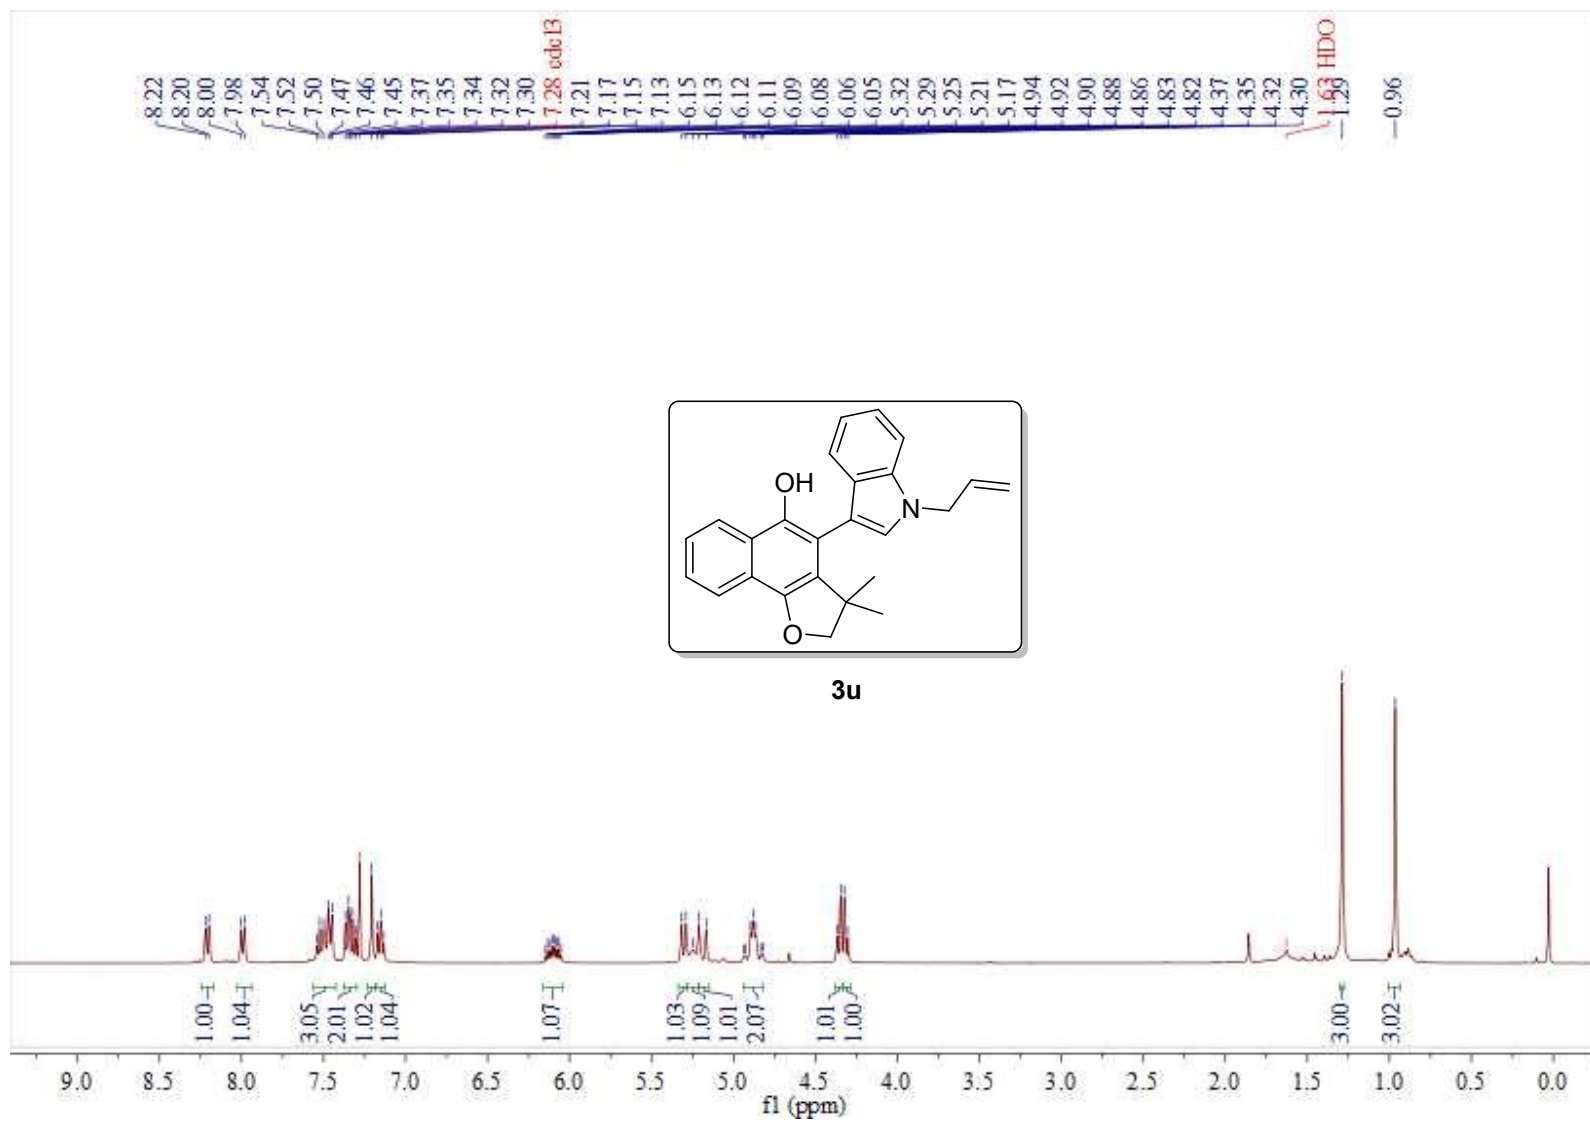

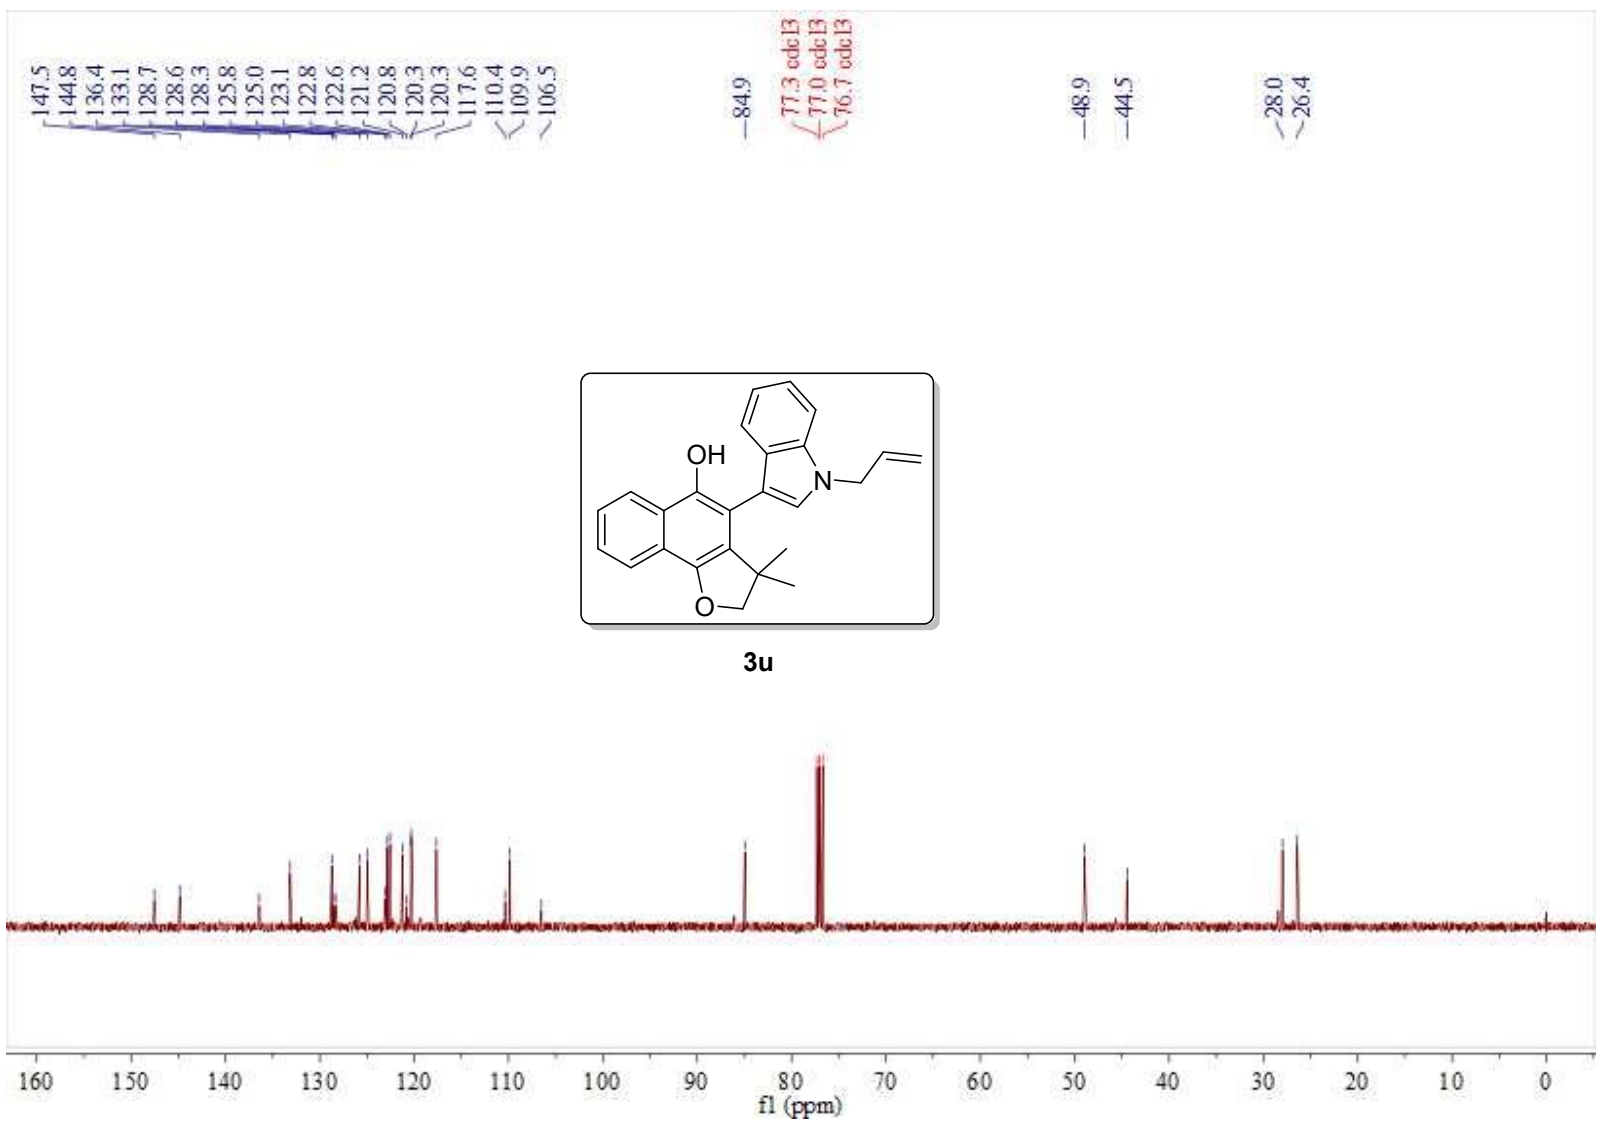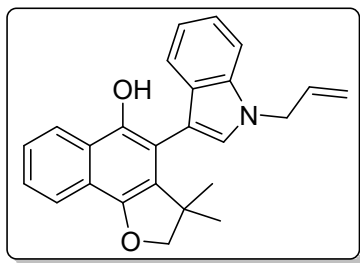

3u

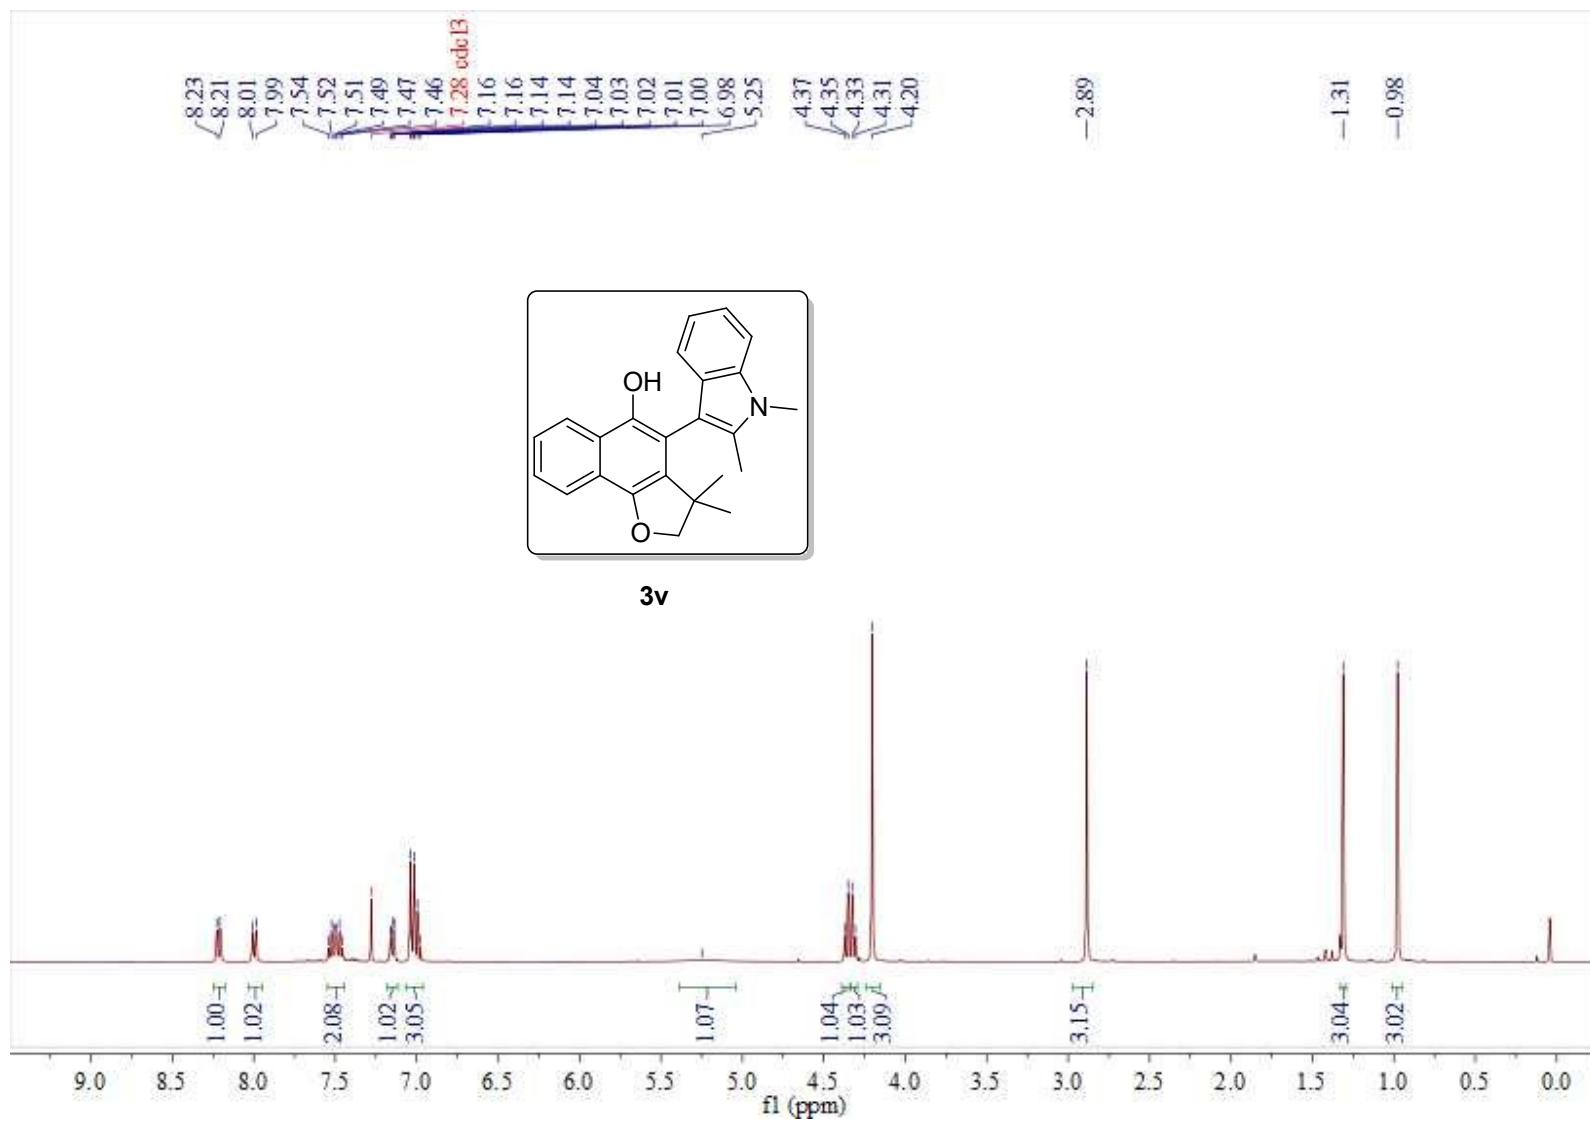

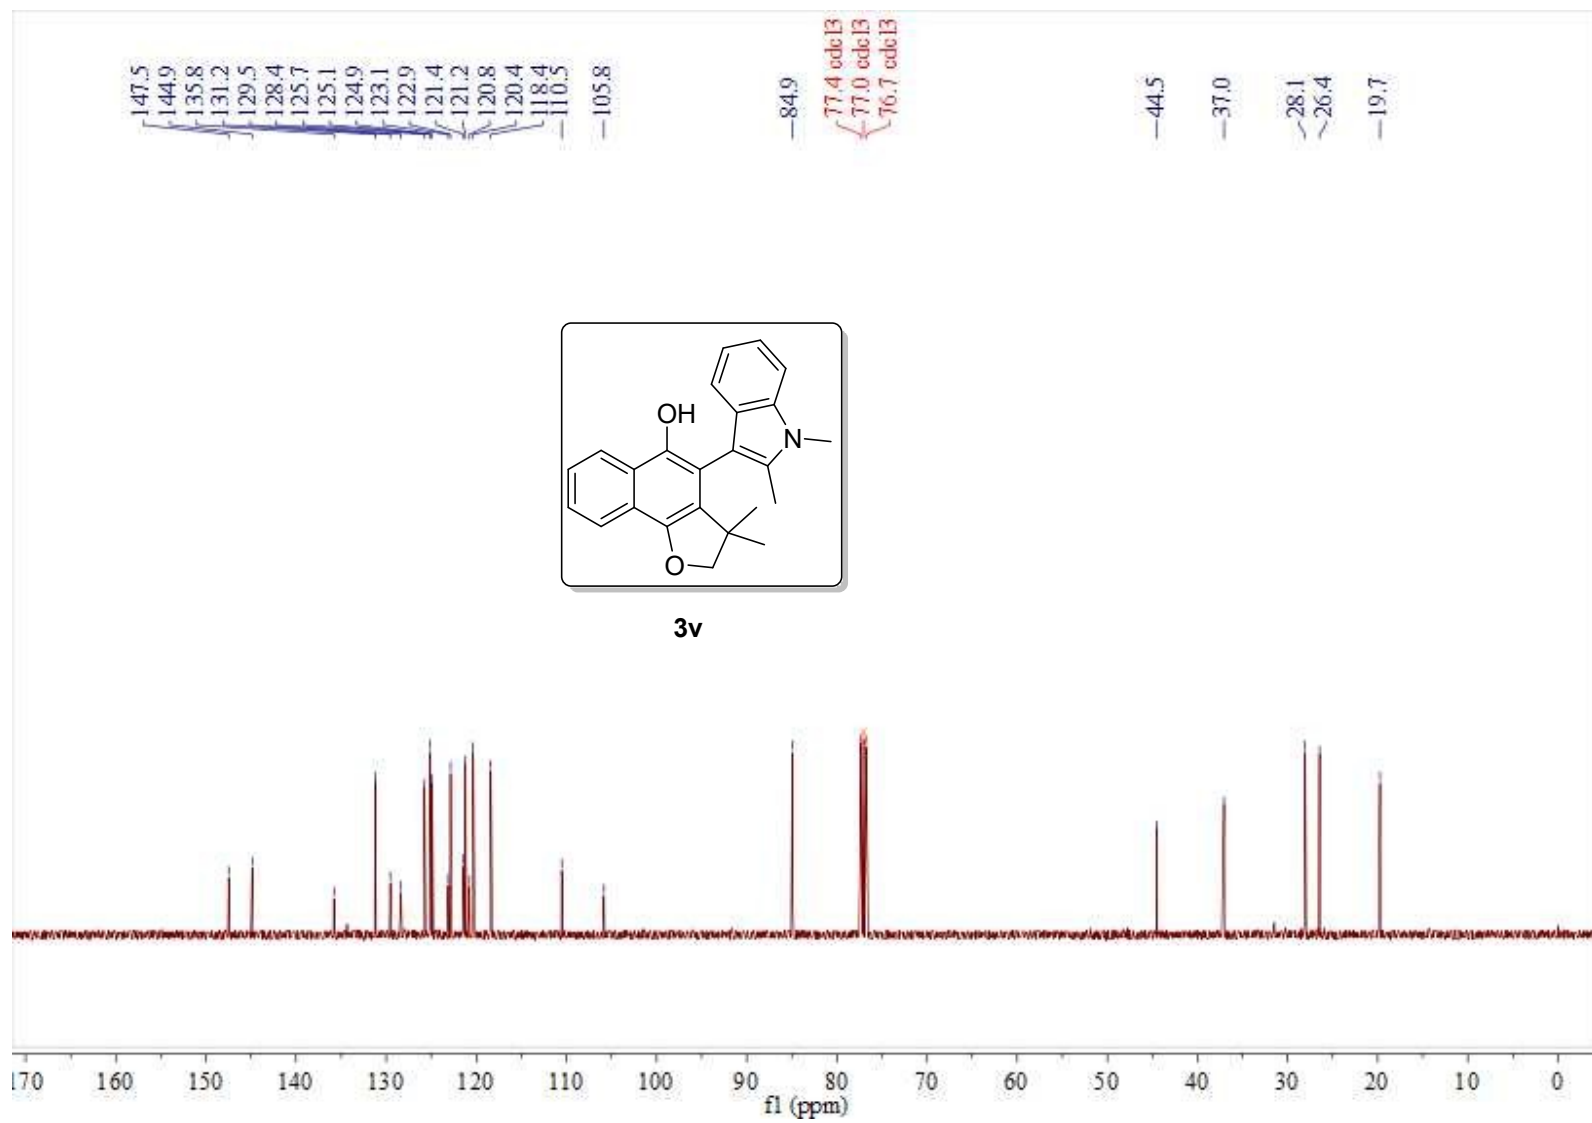

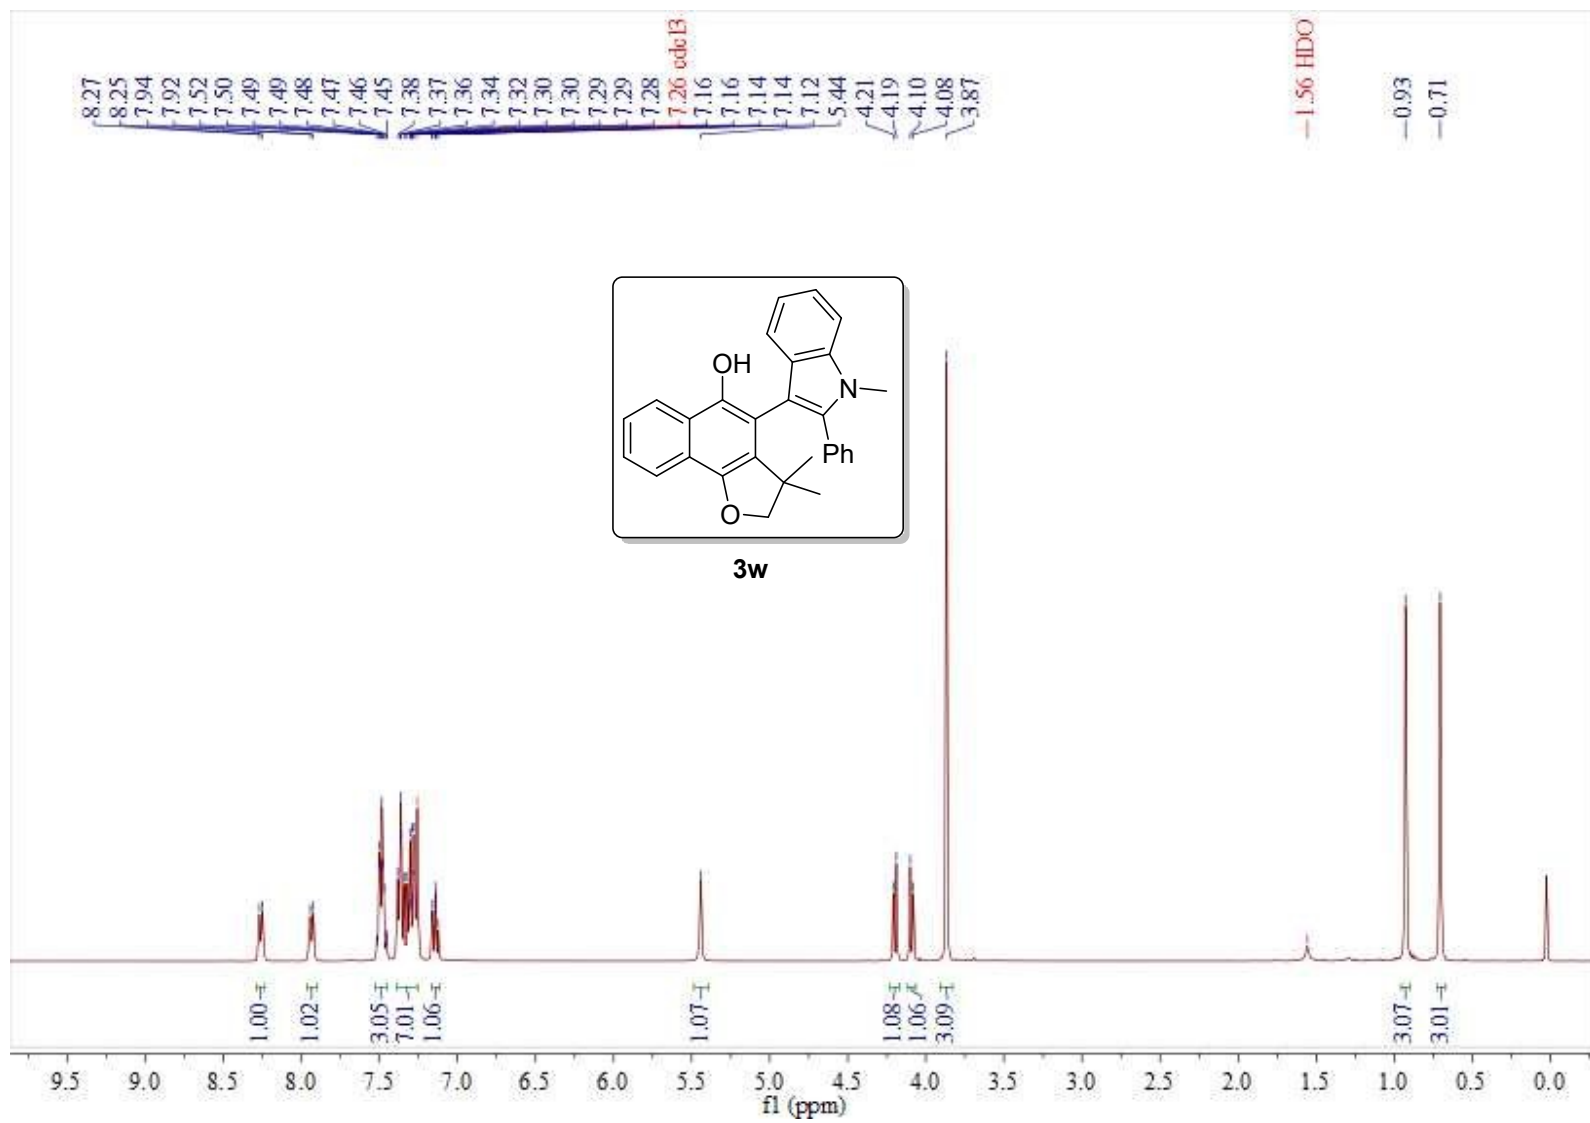

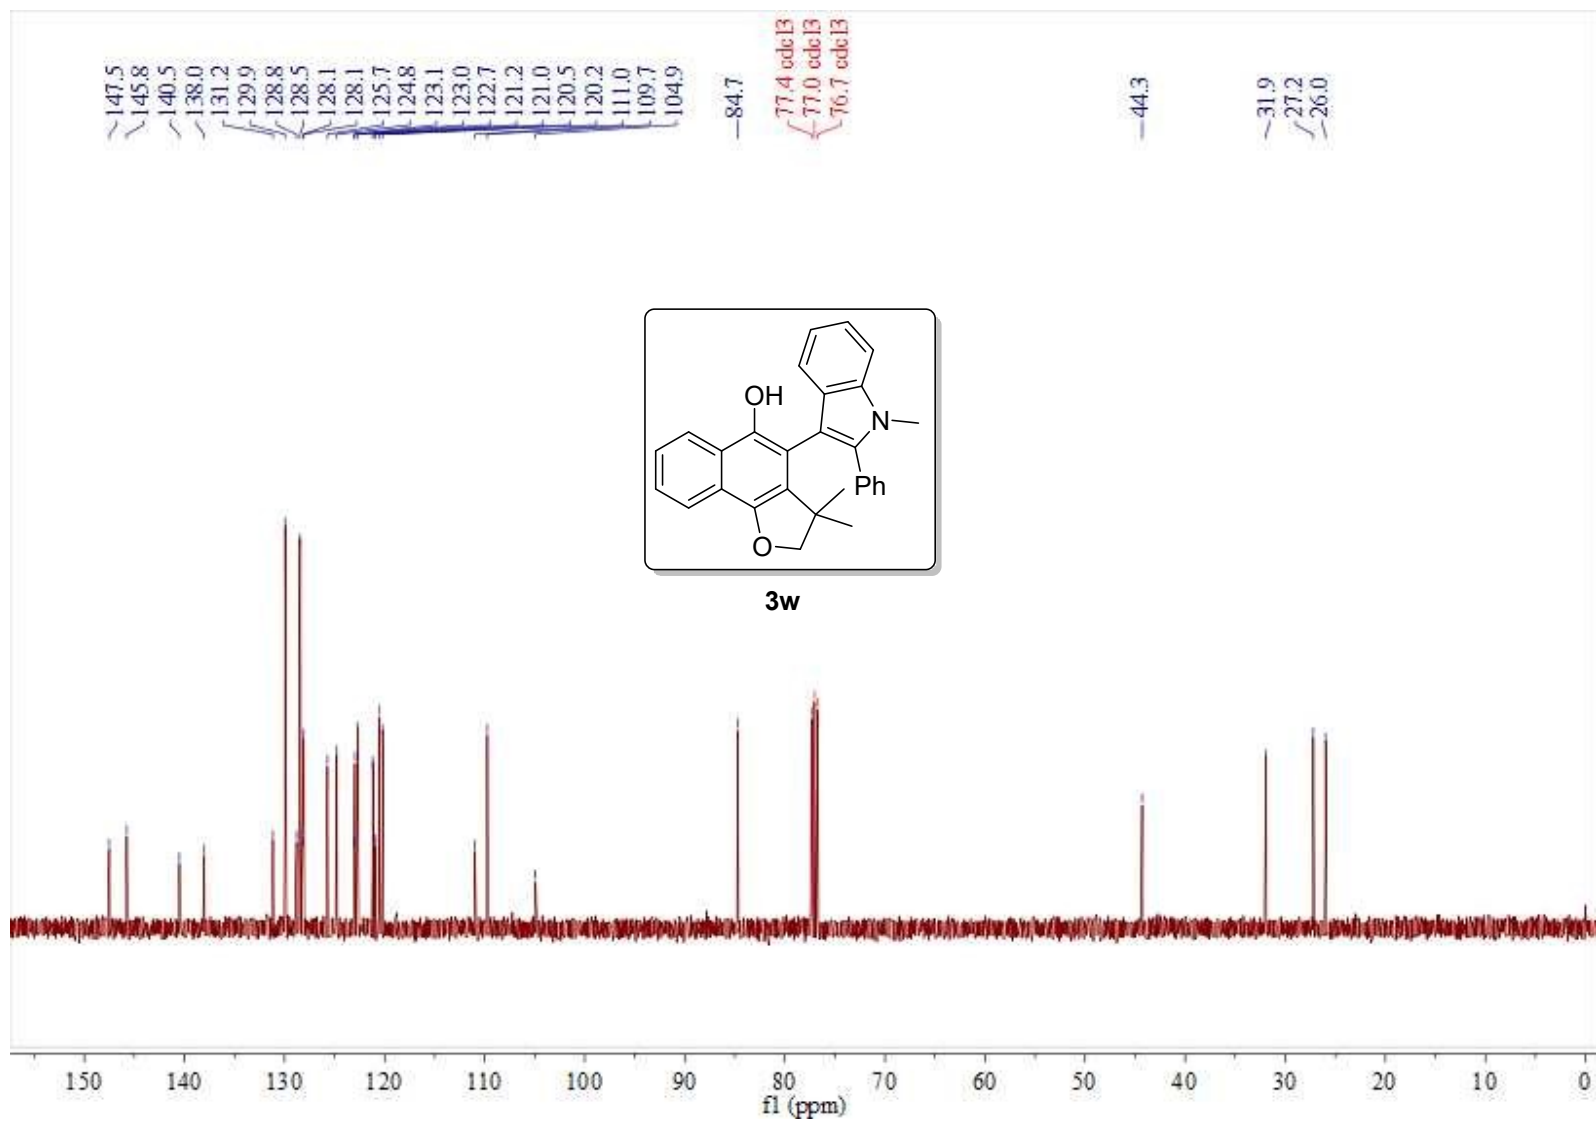

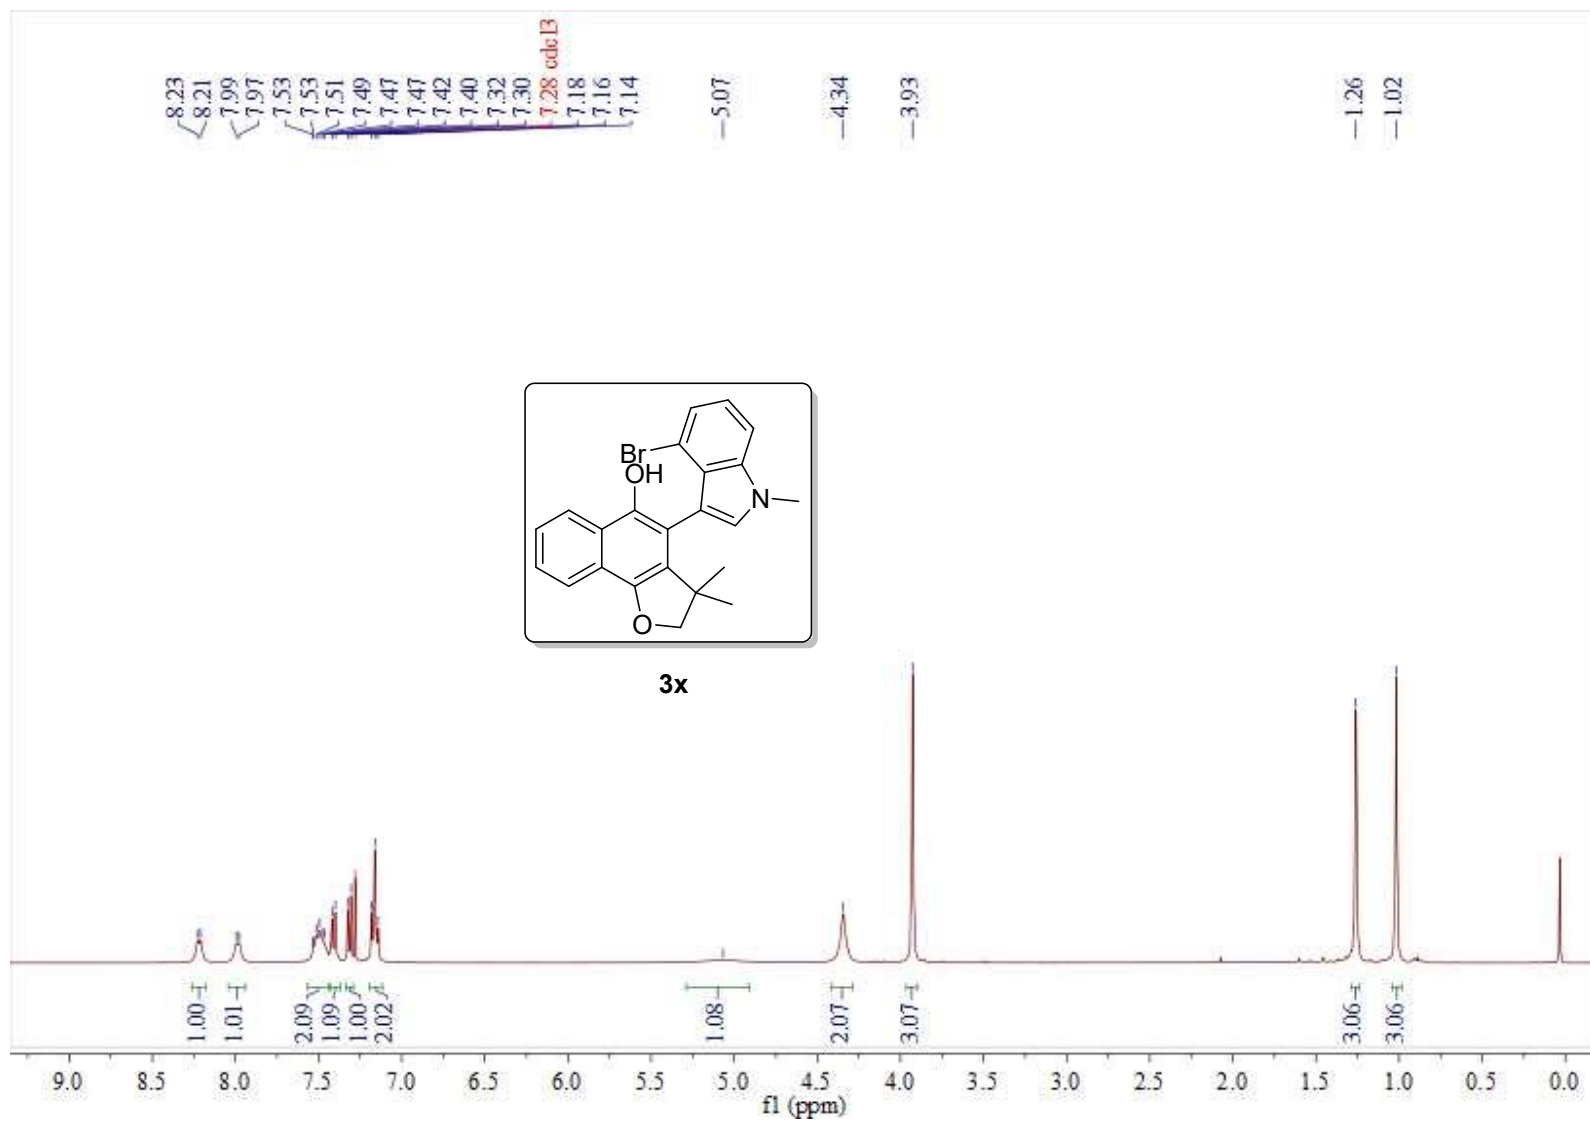

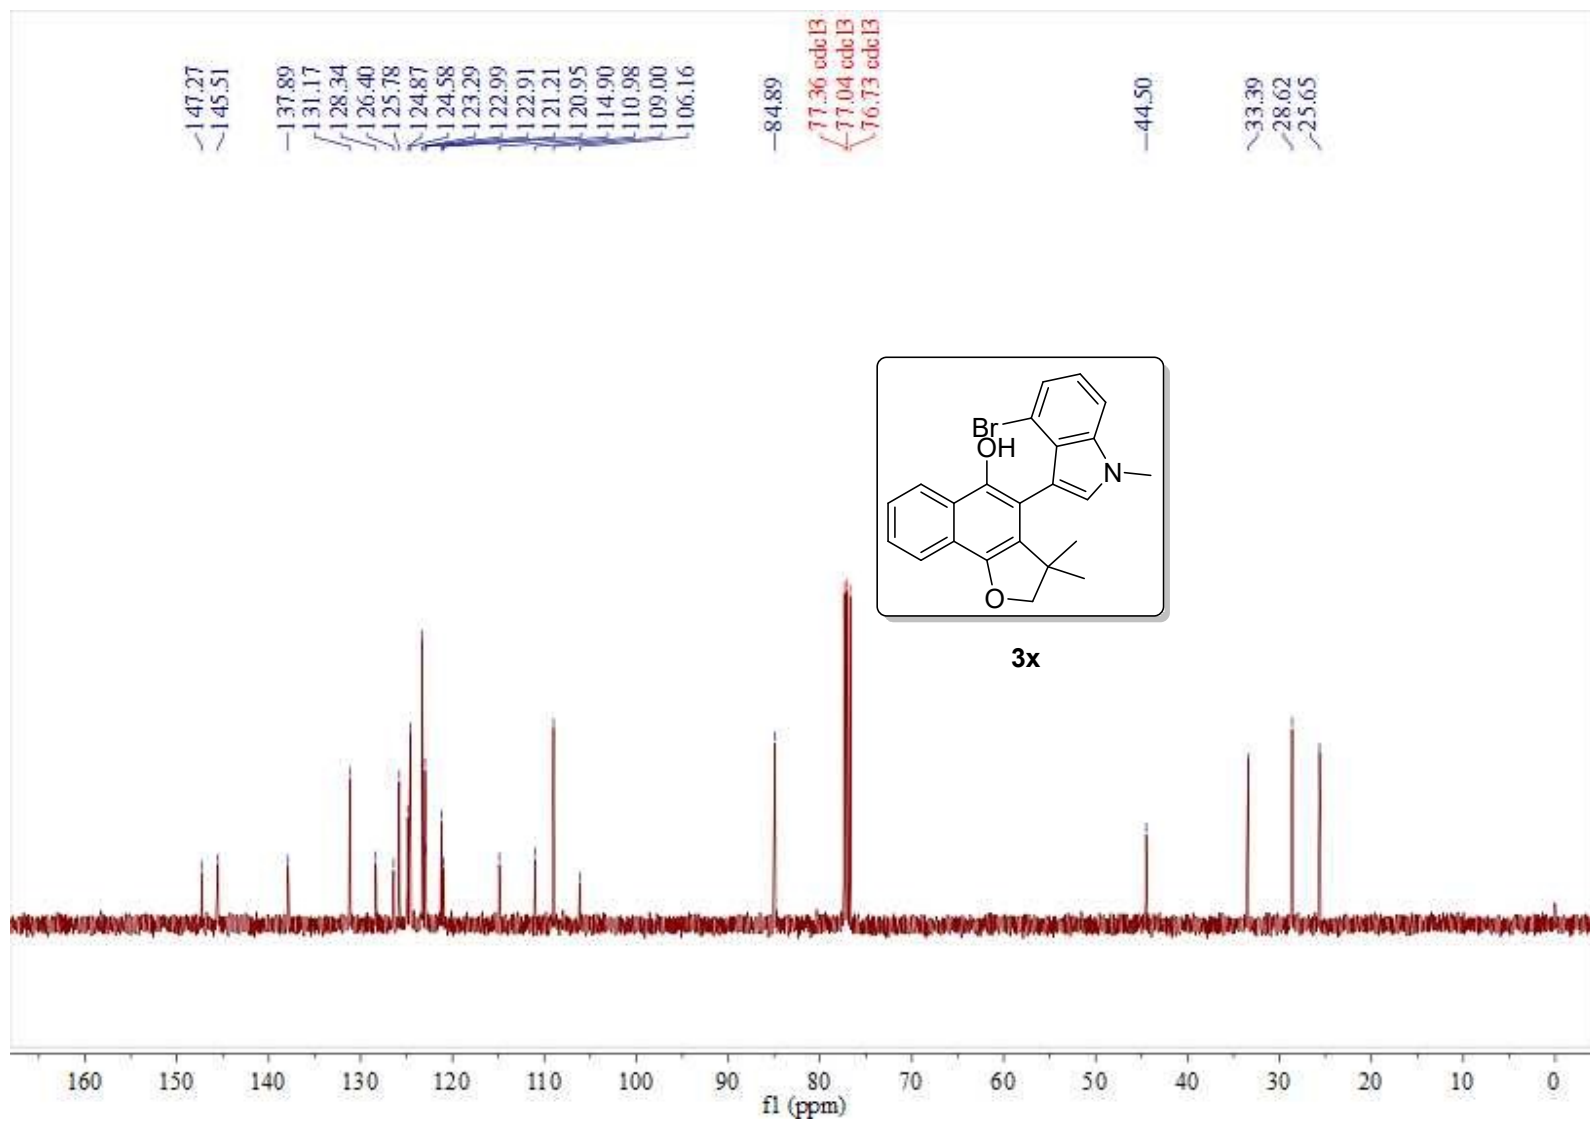



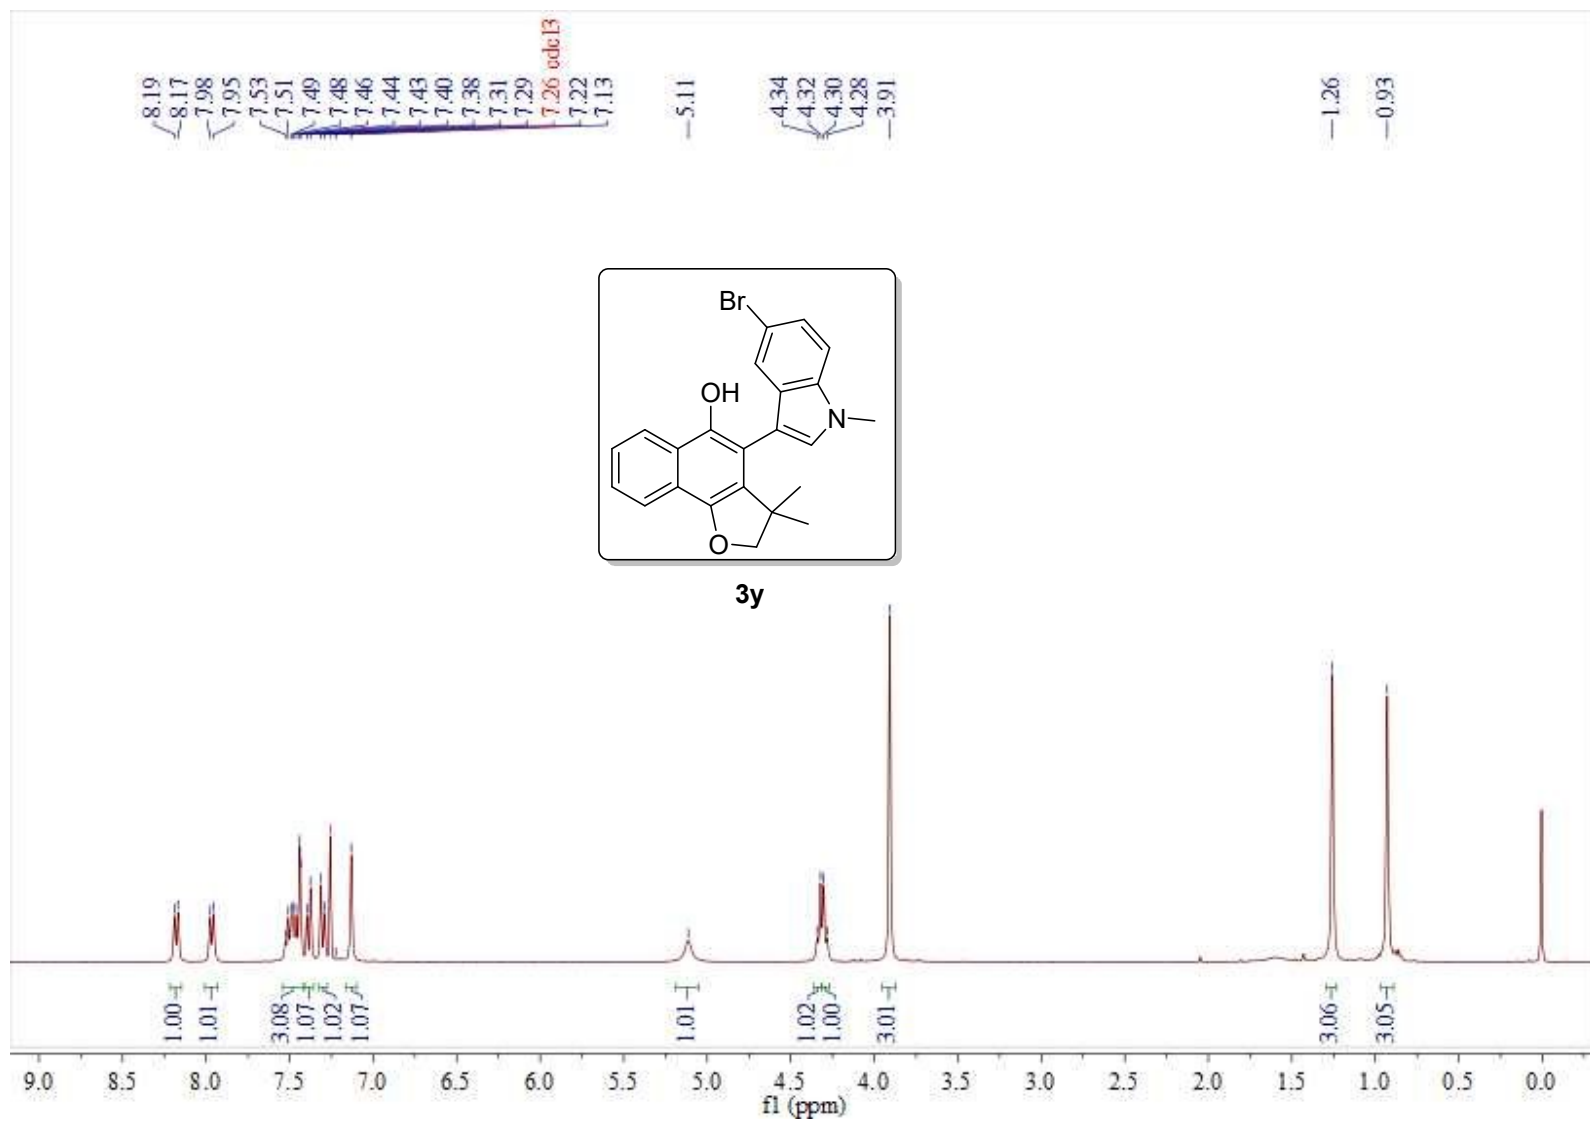

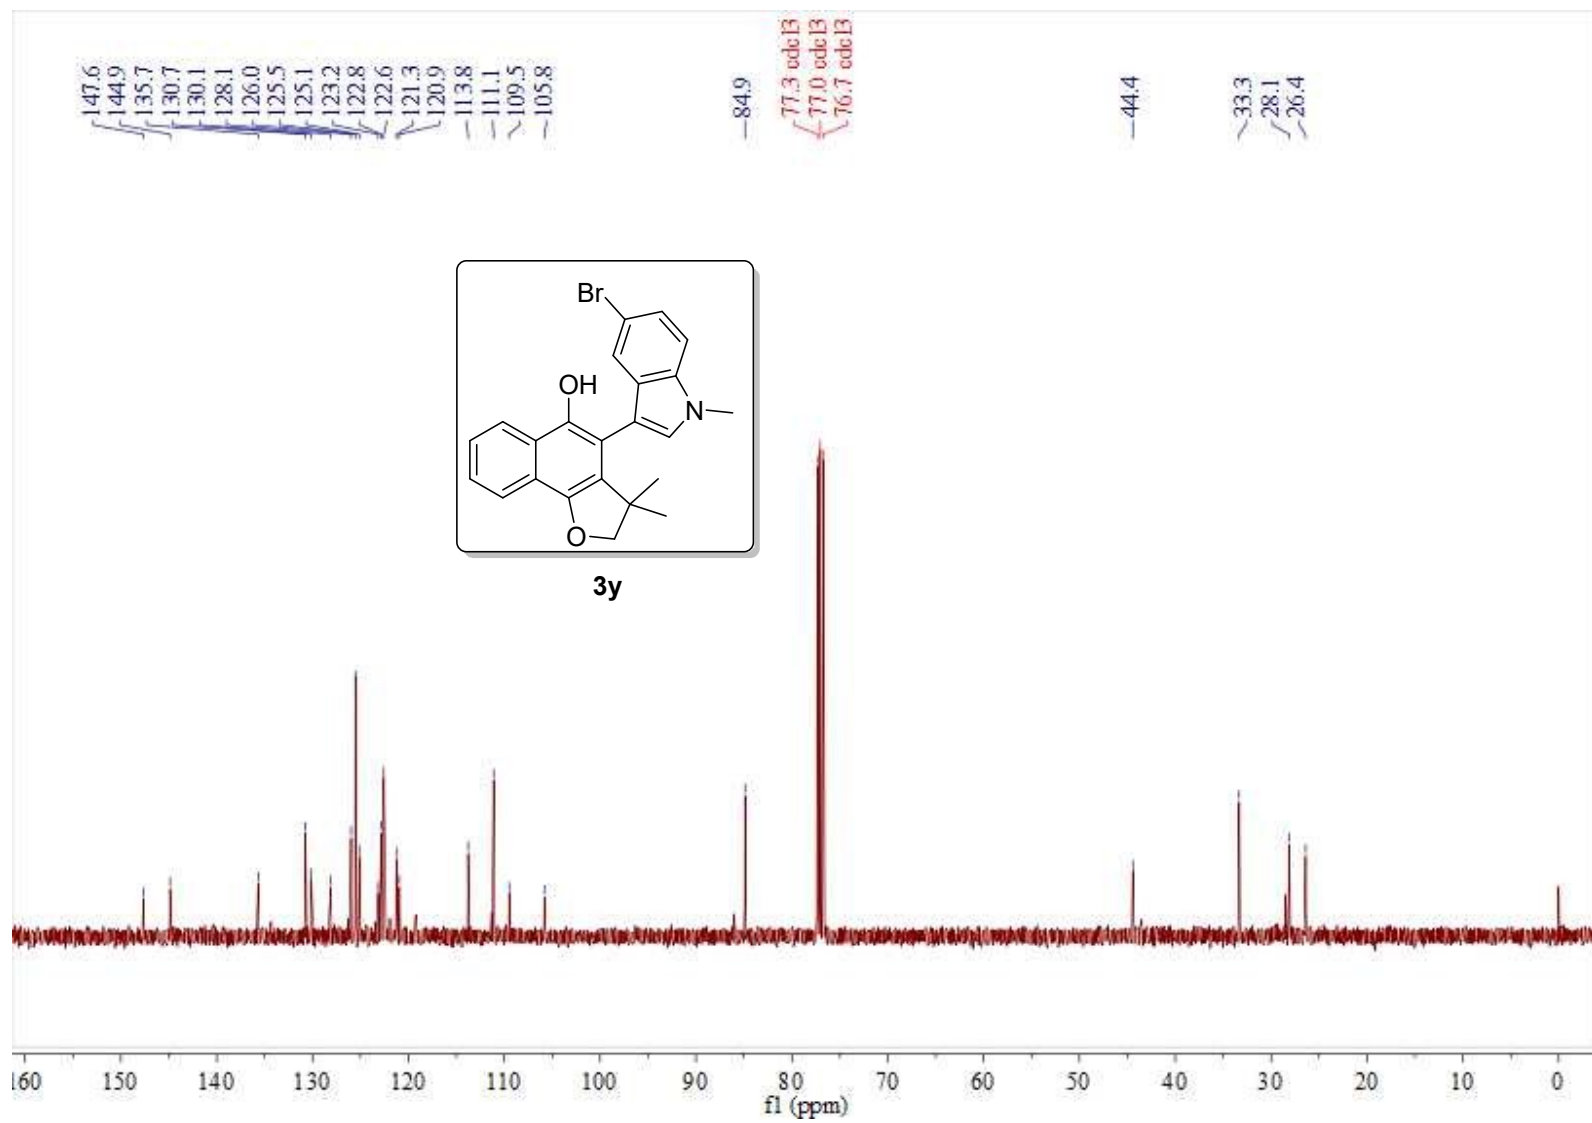

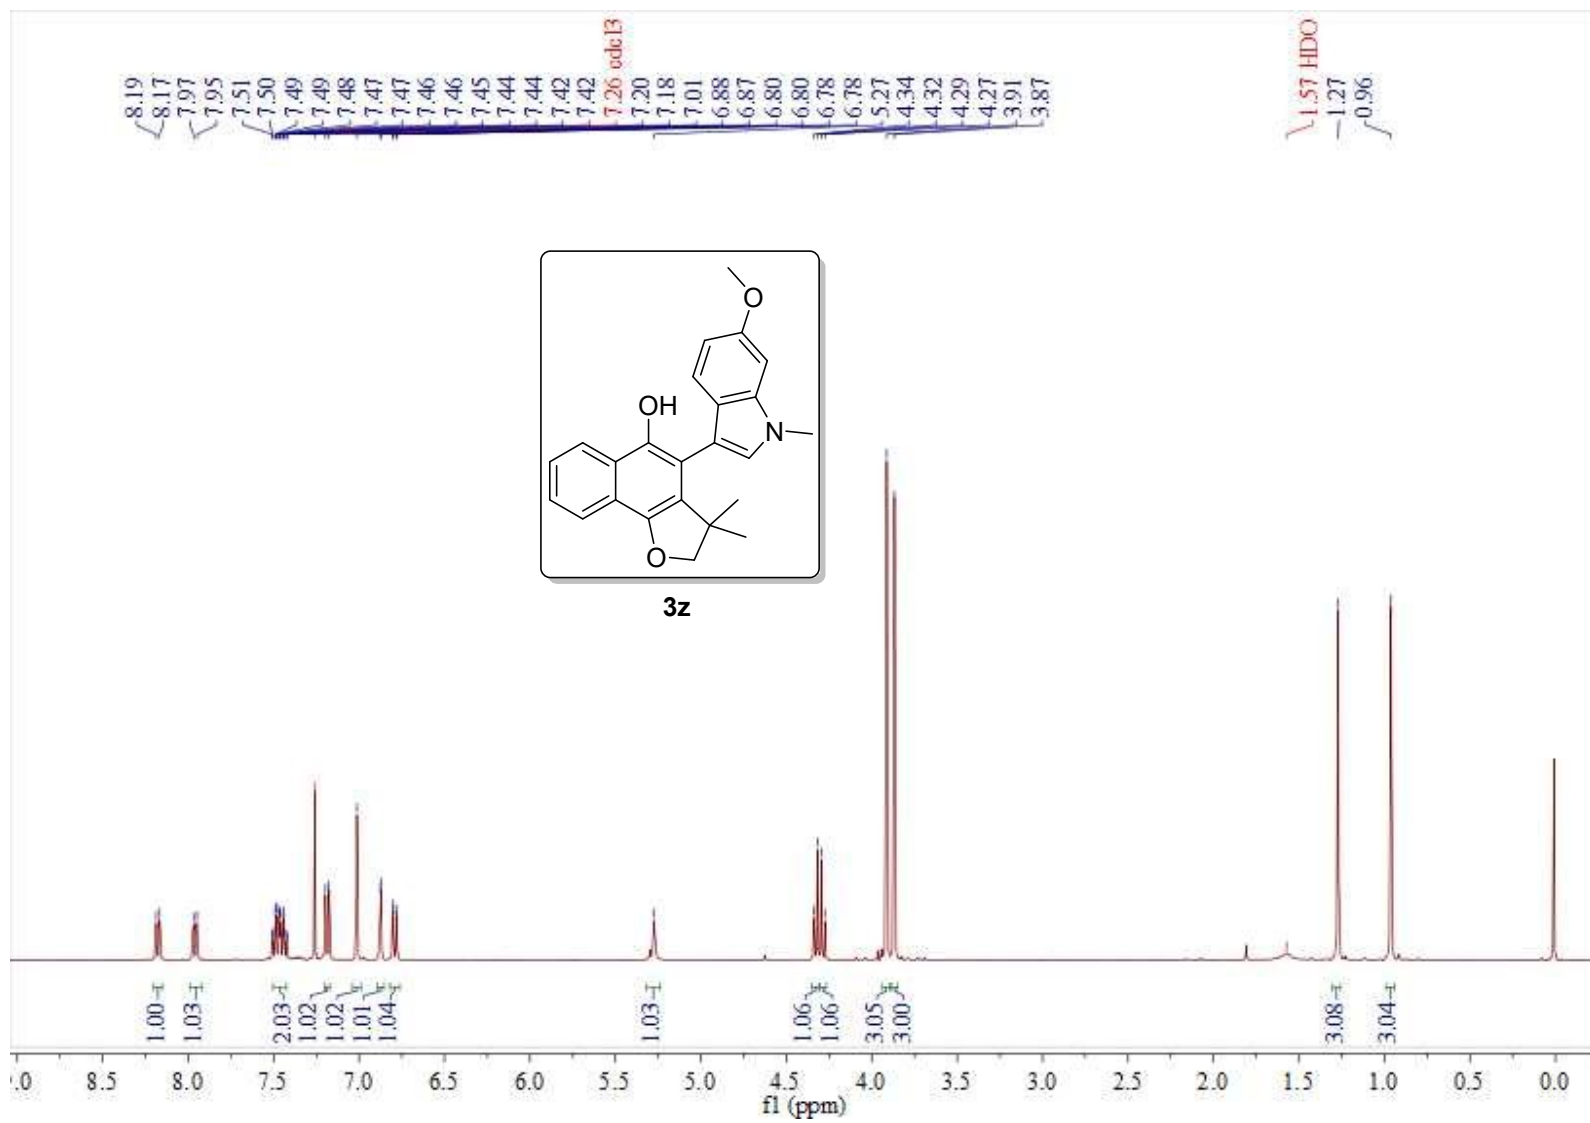

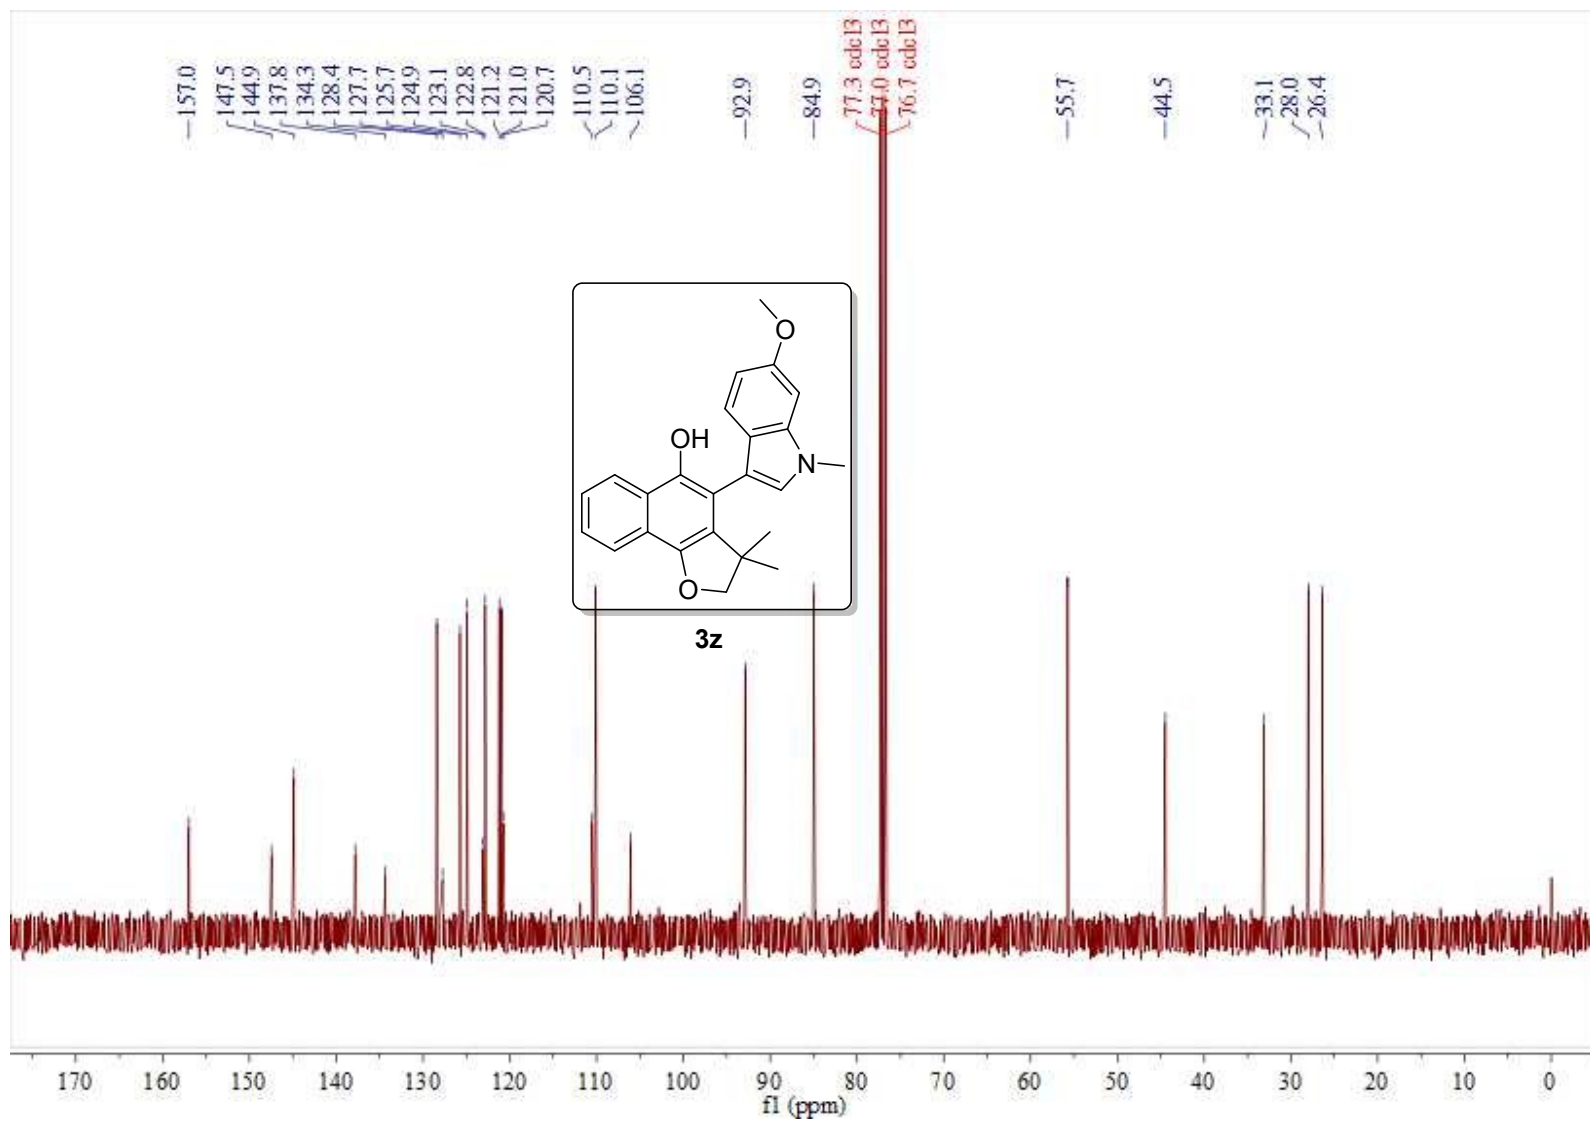

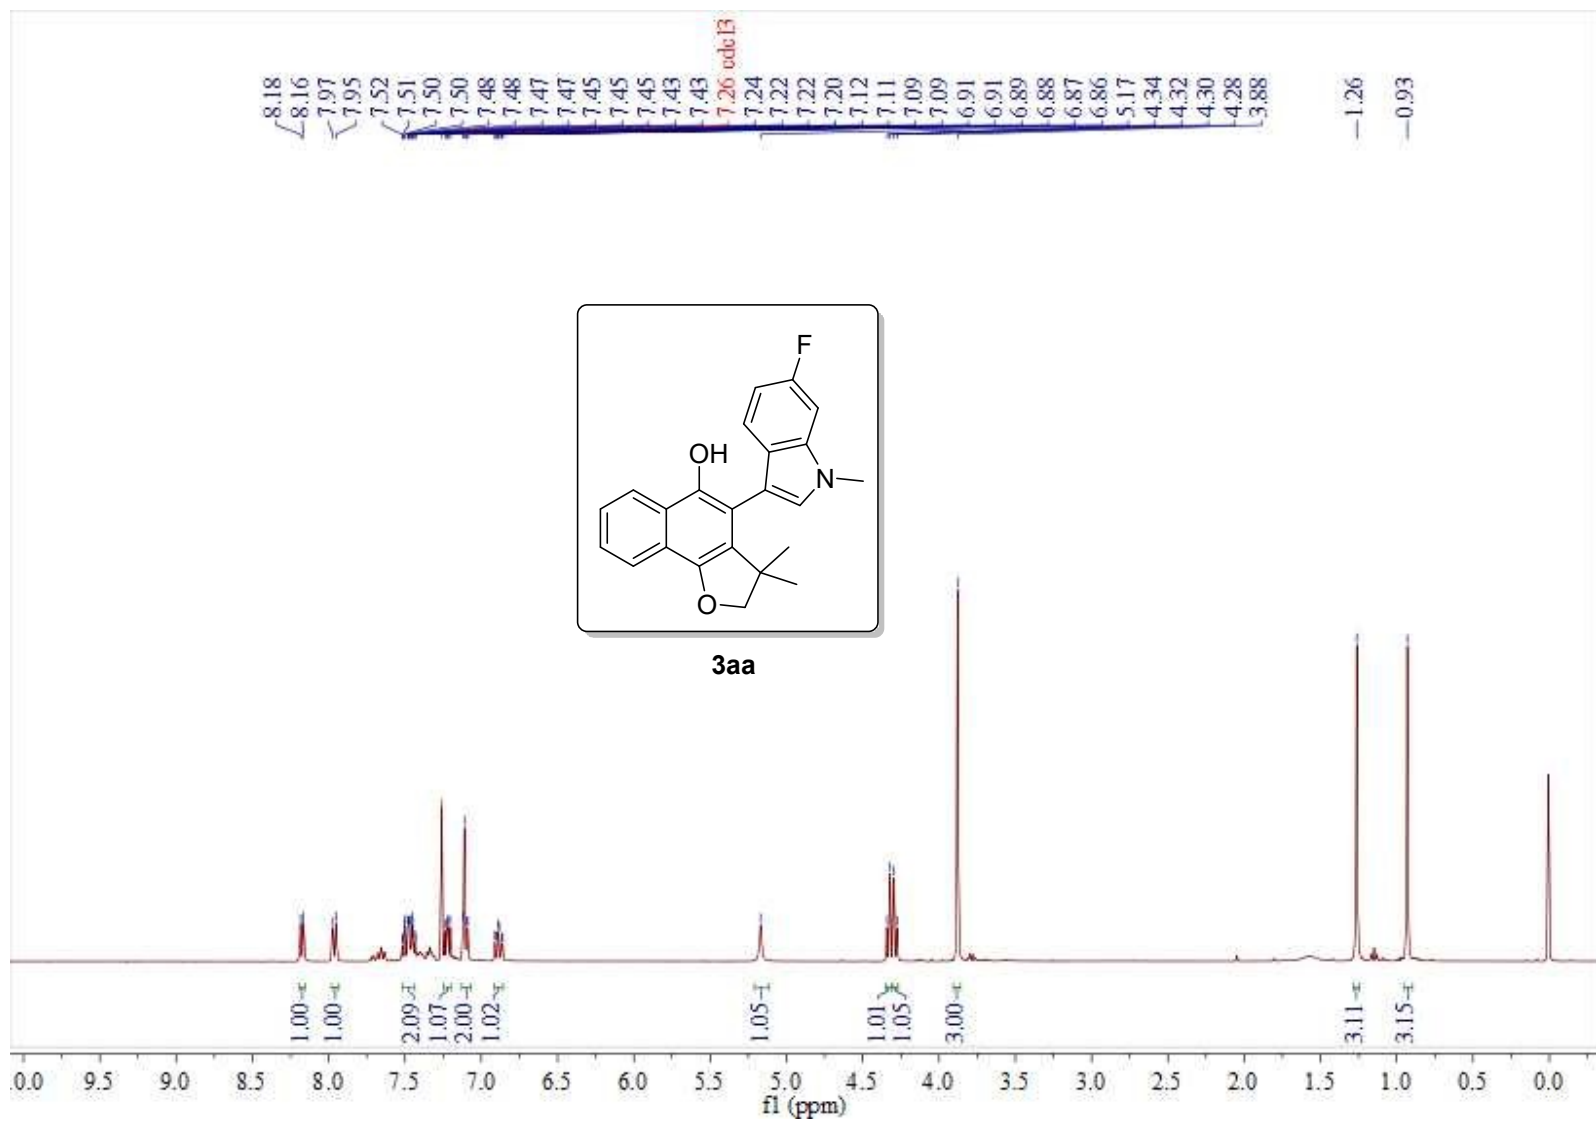

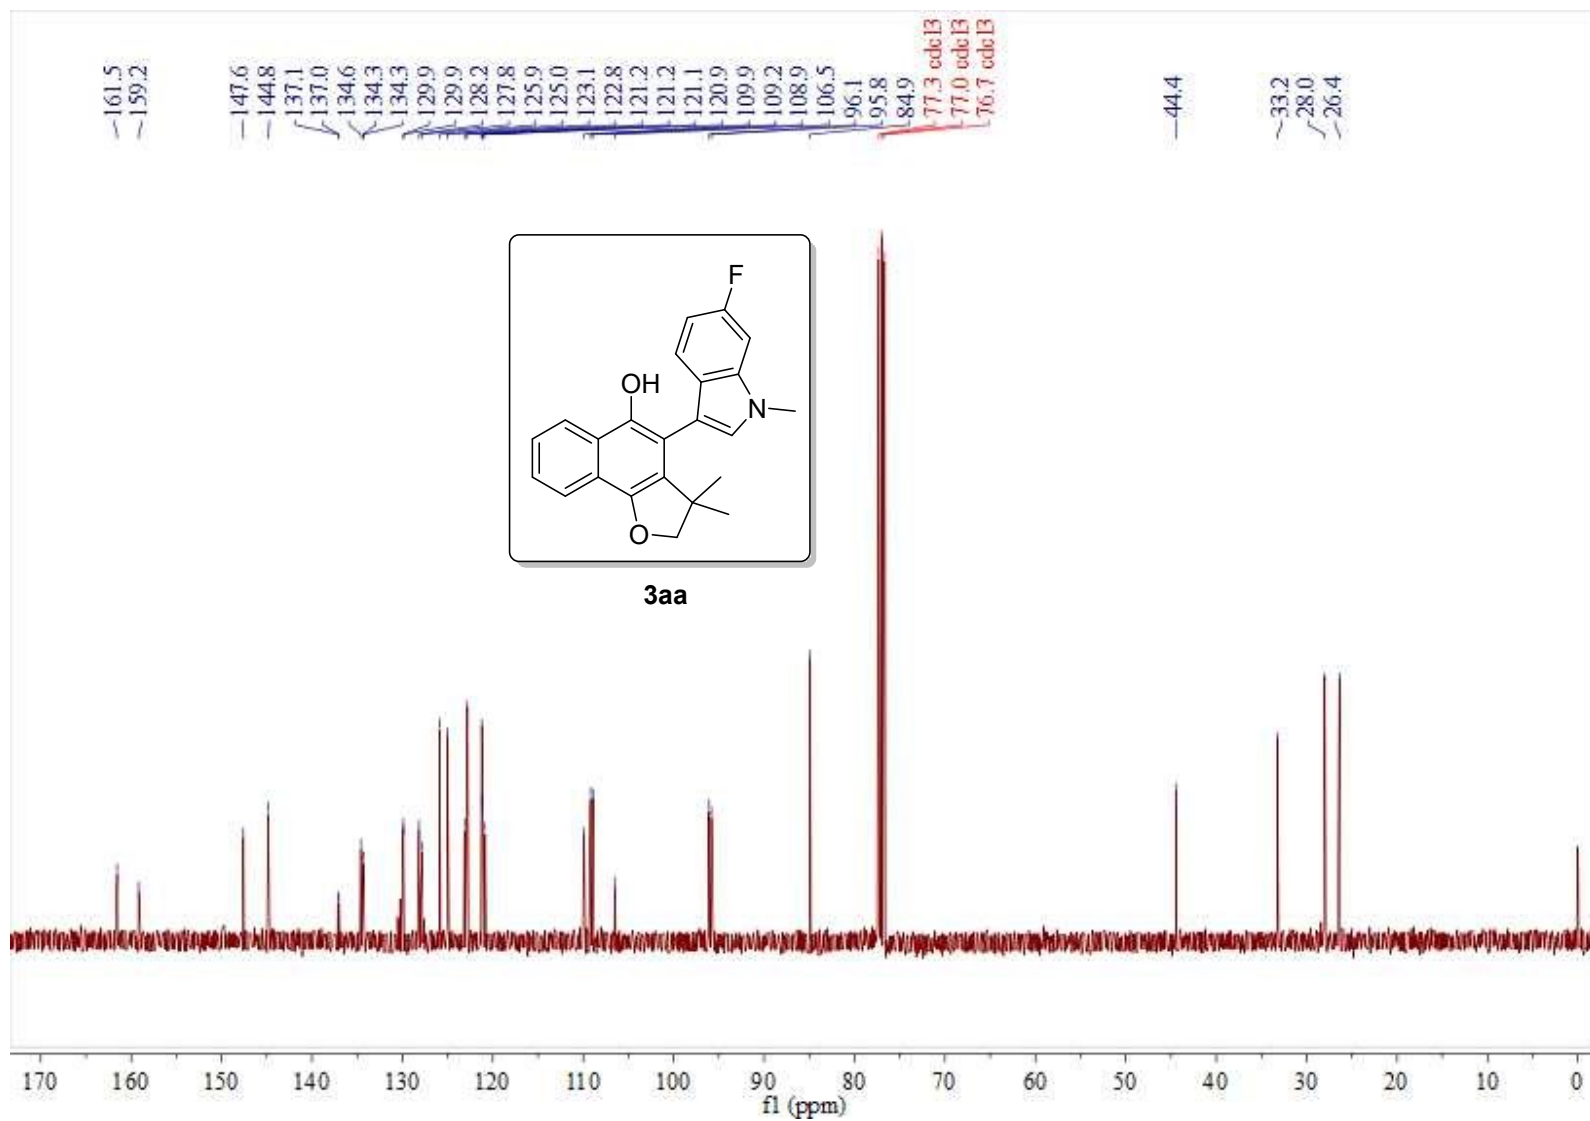

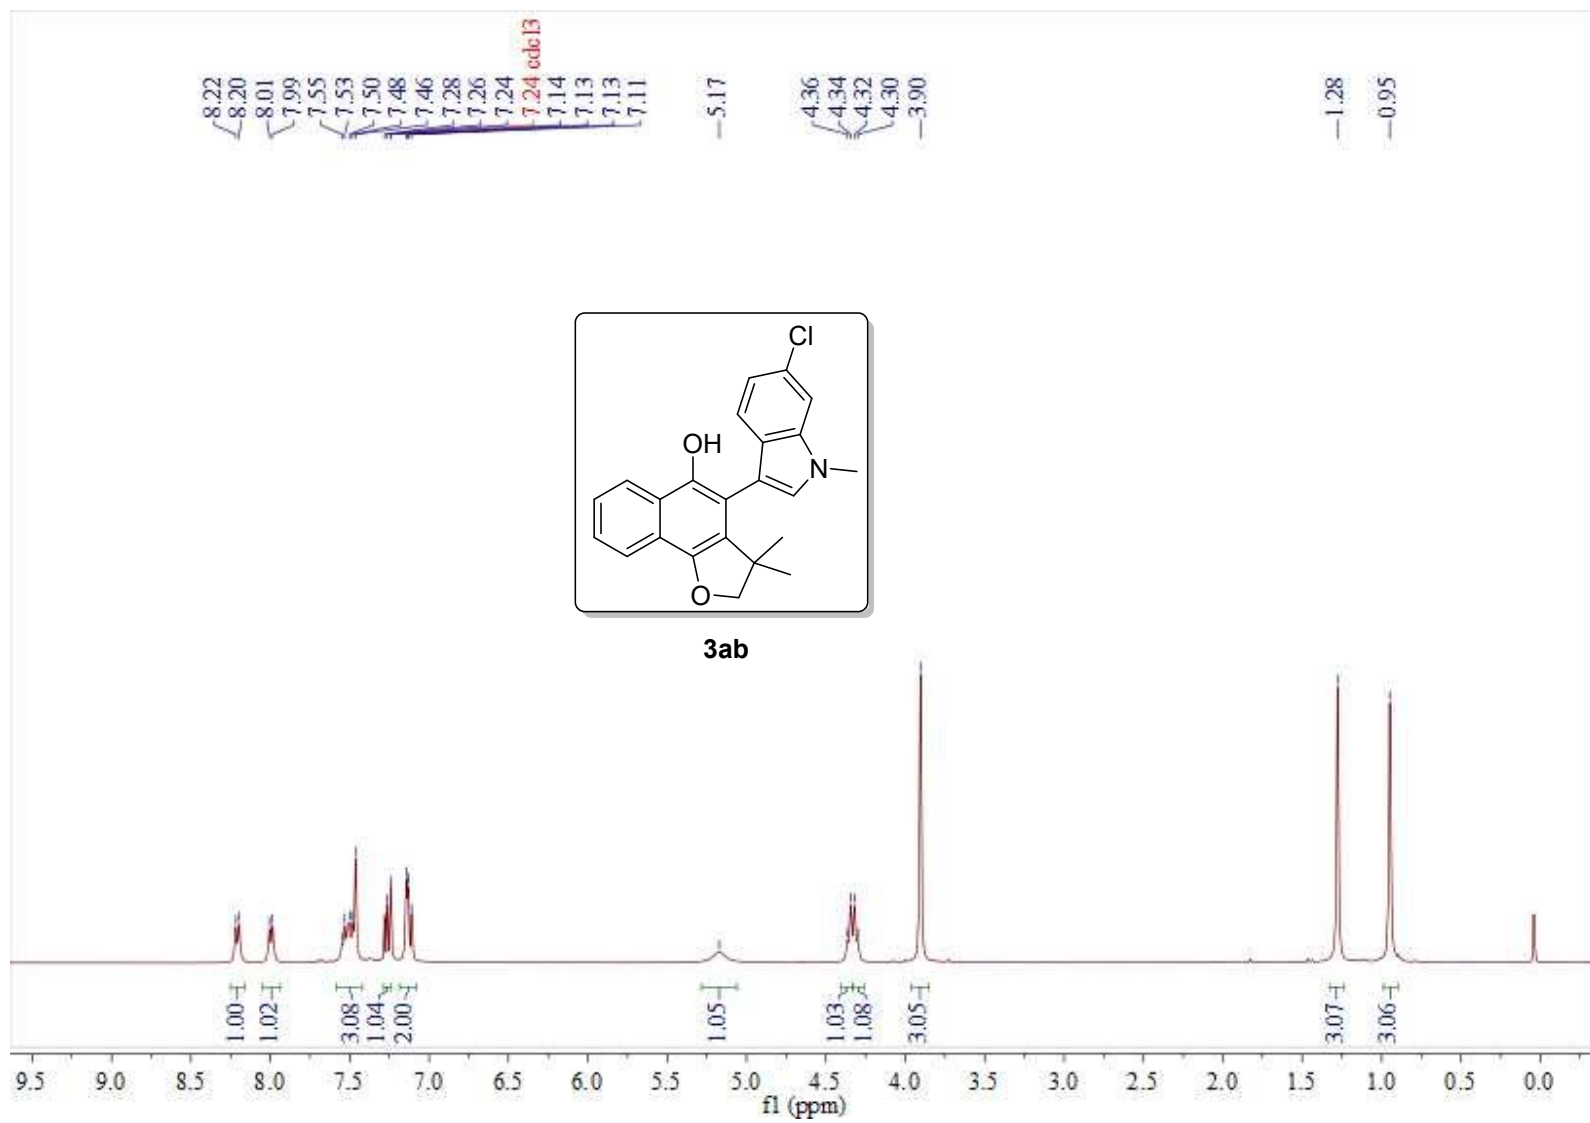

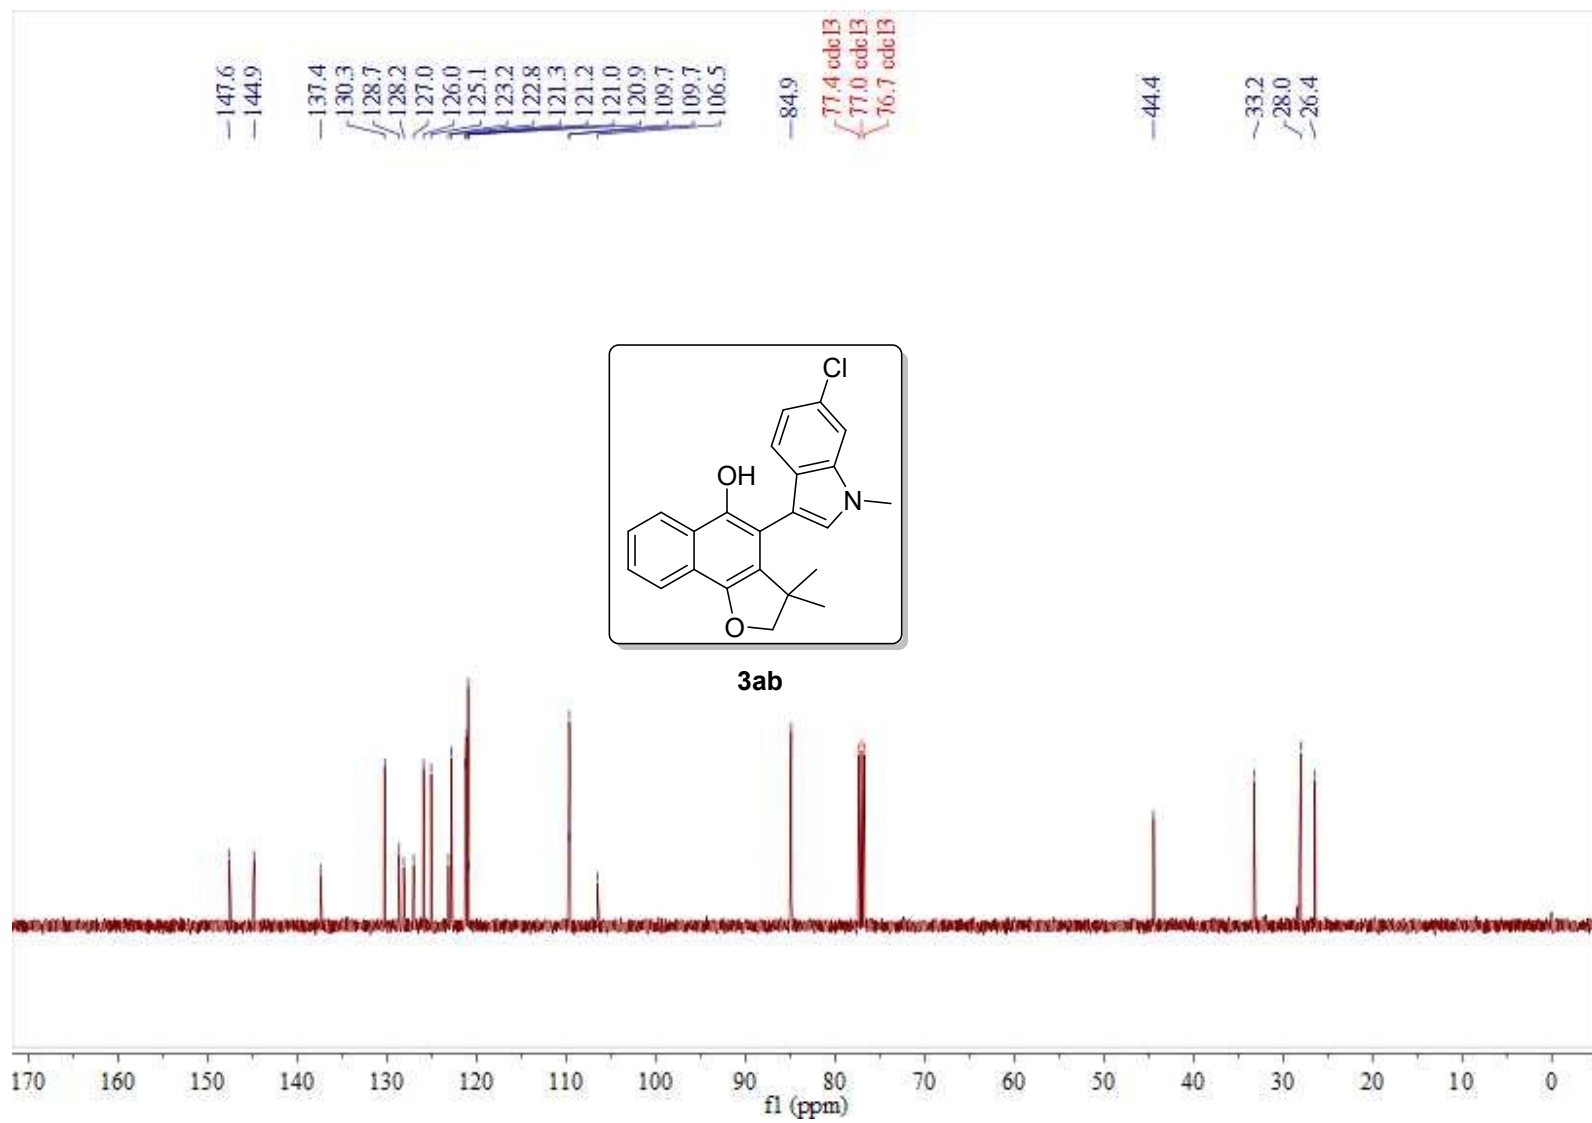



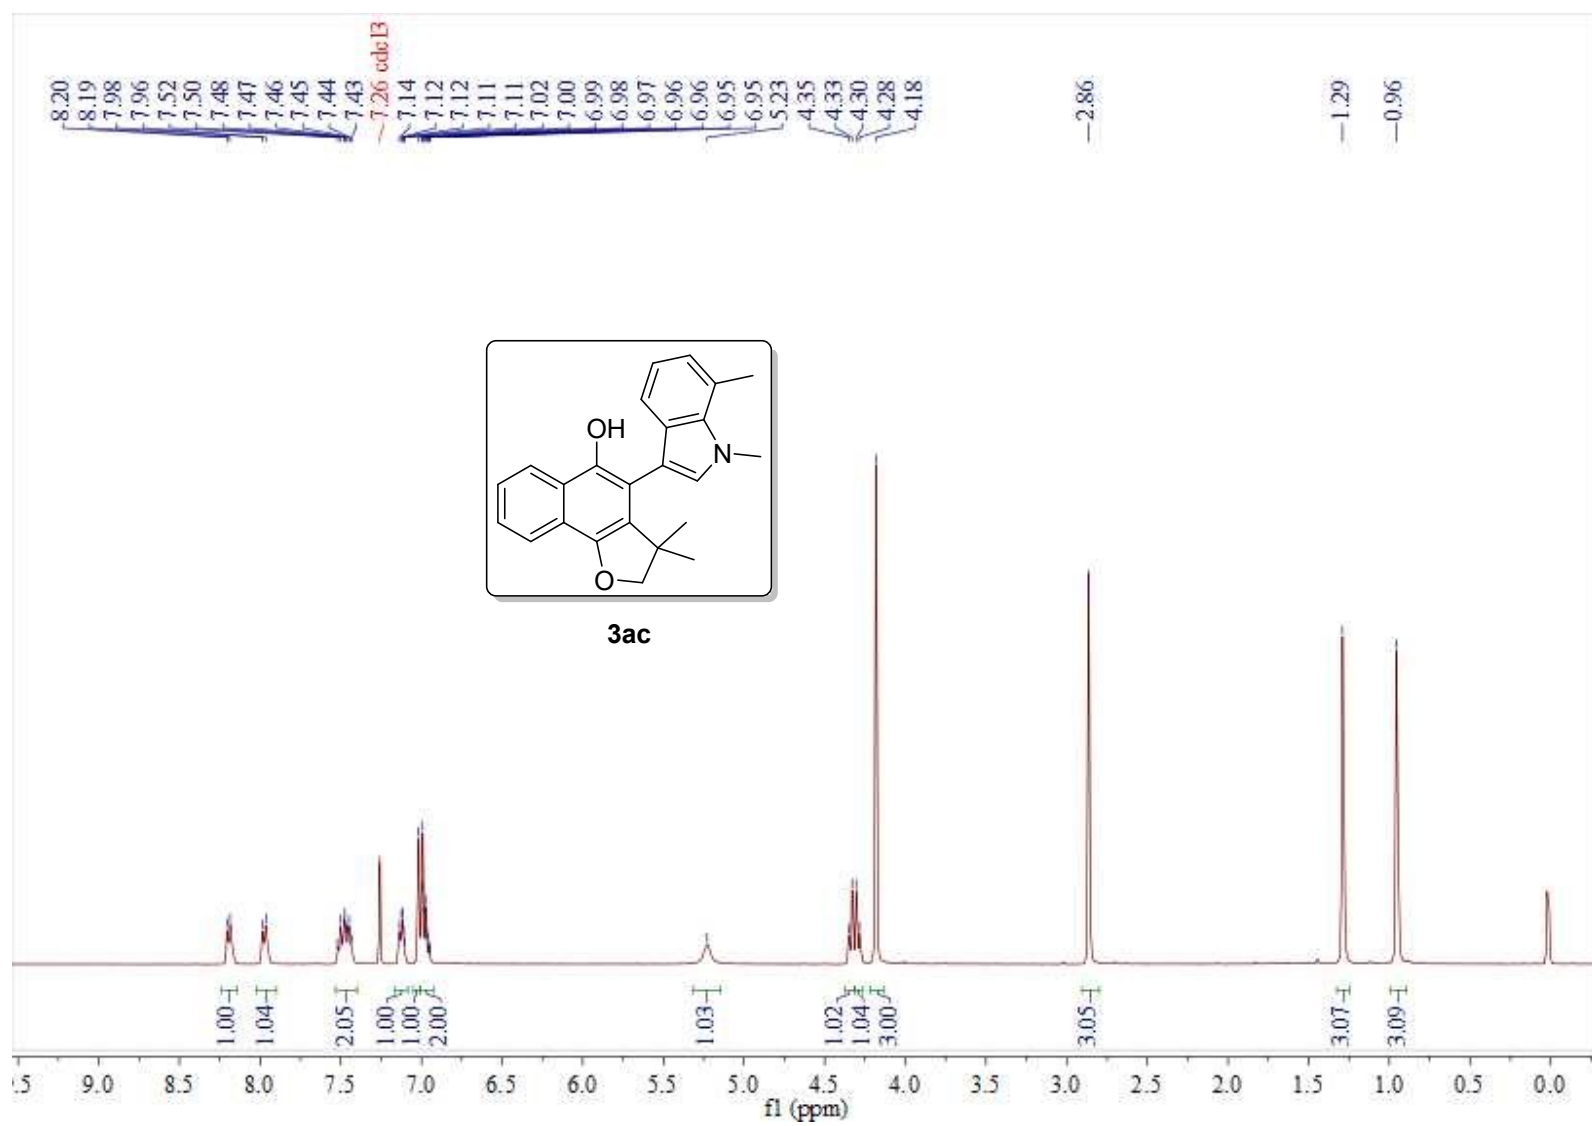

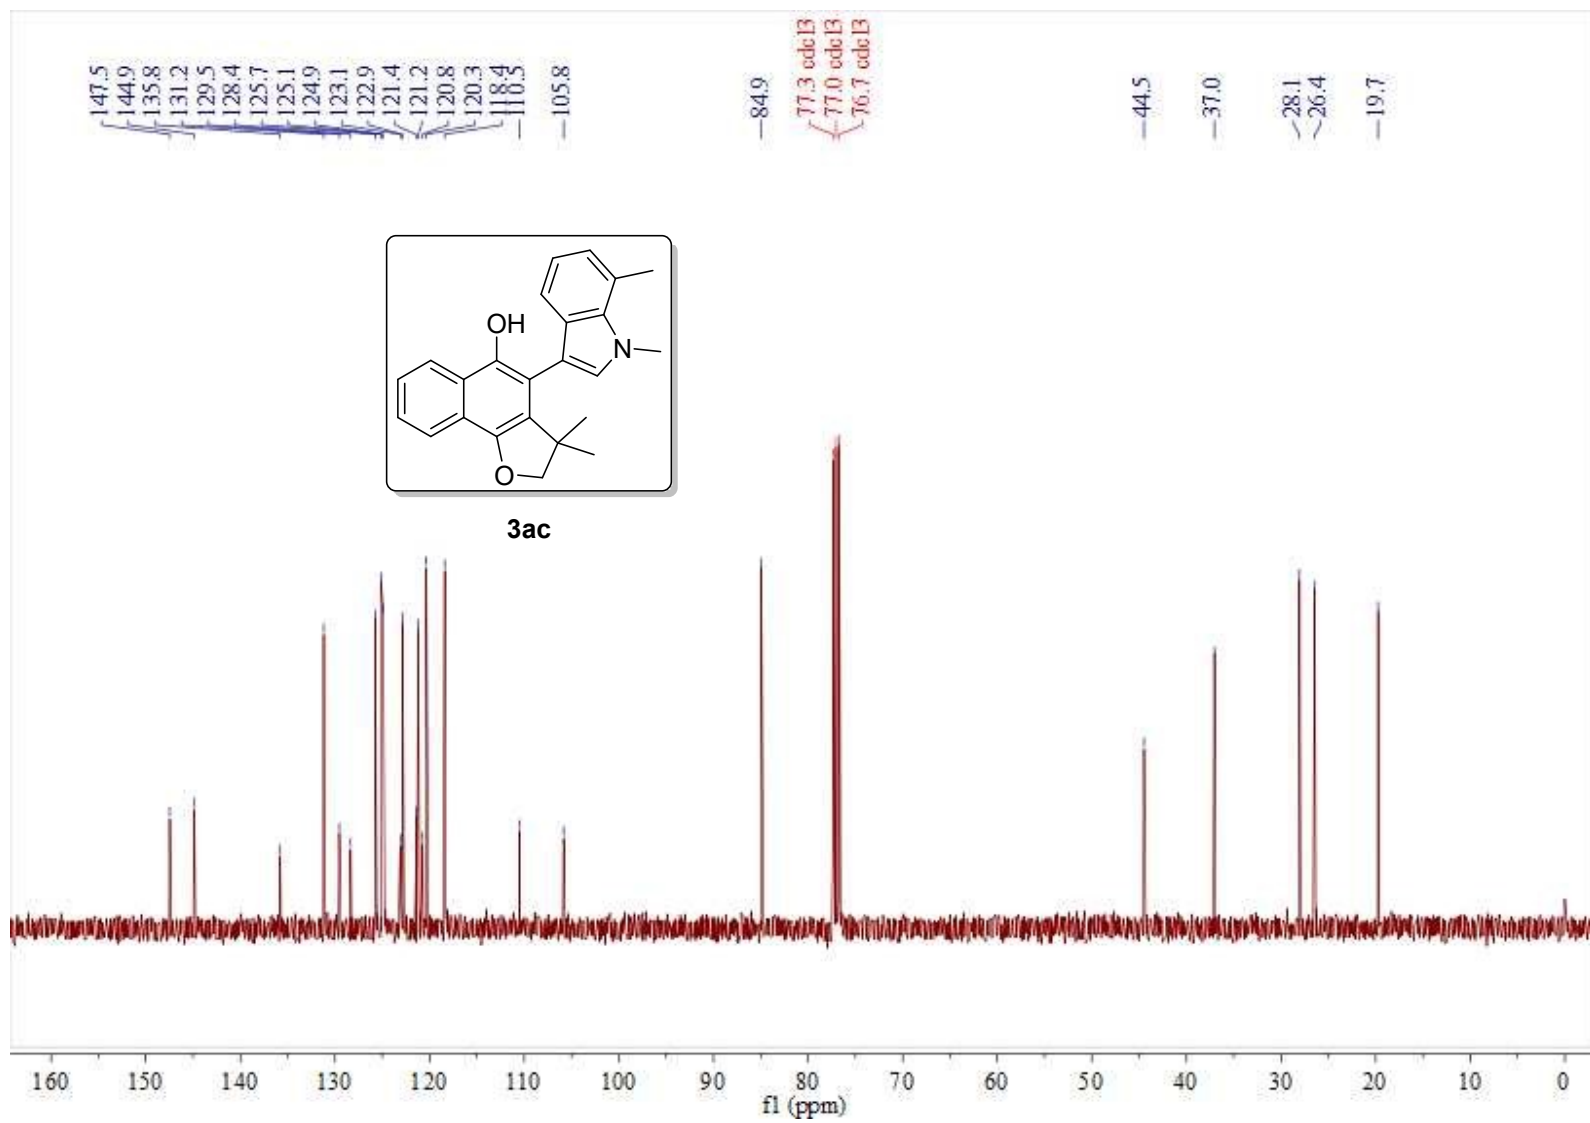

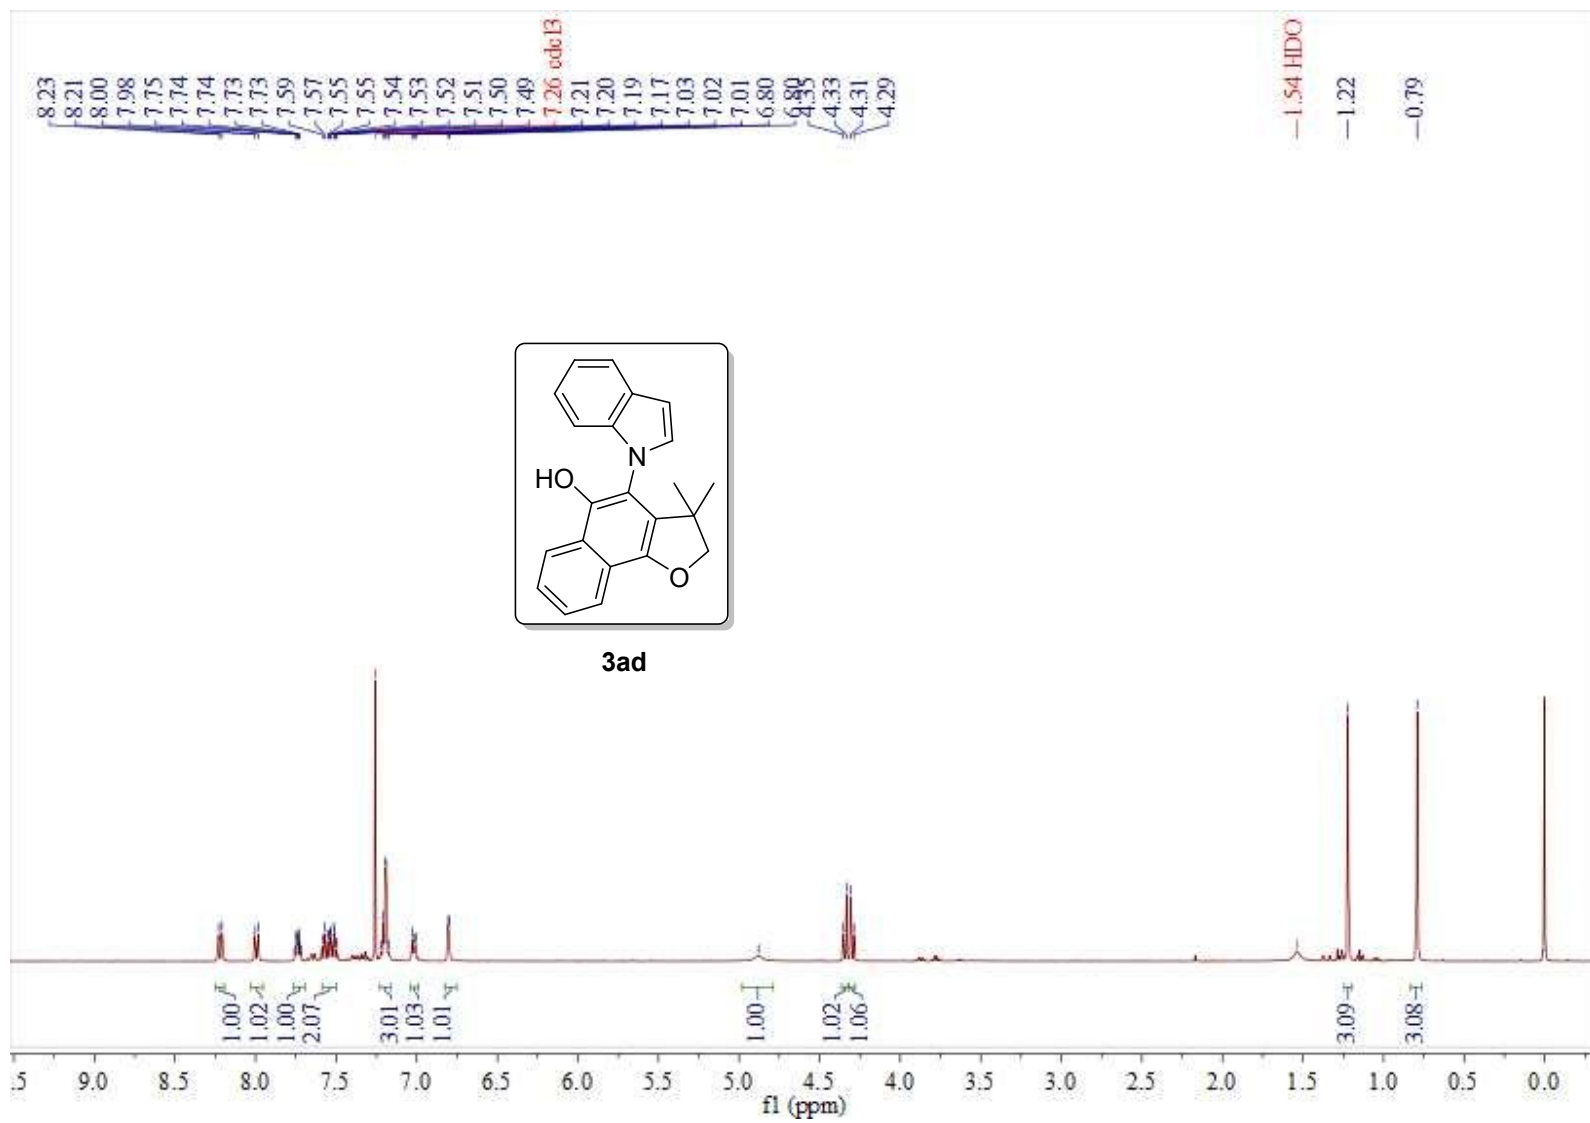

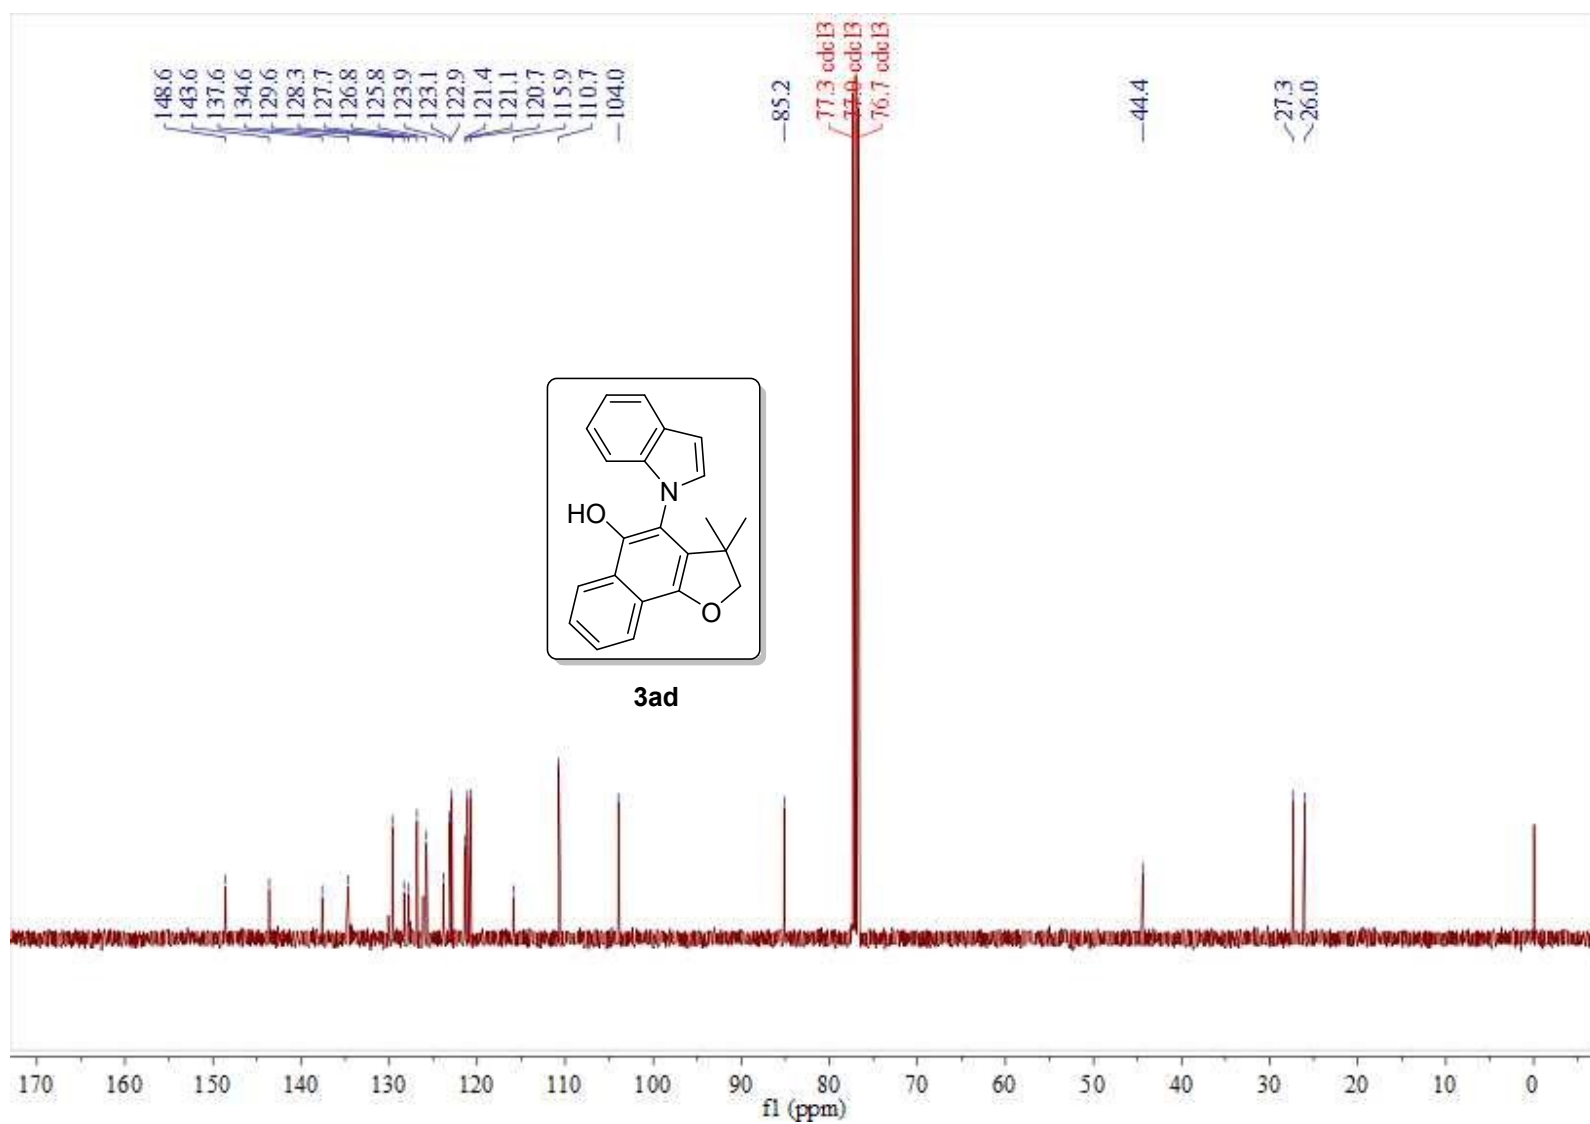

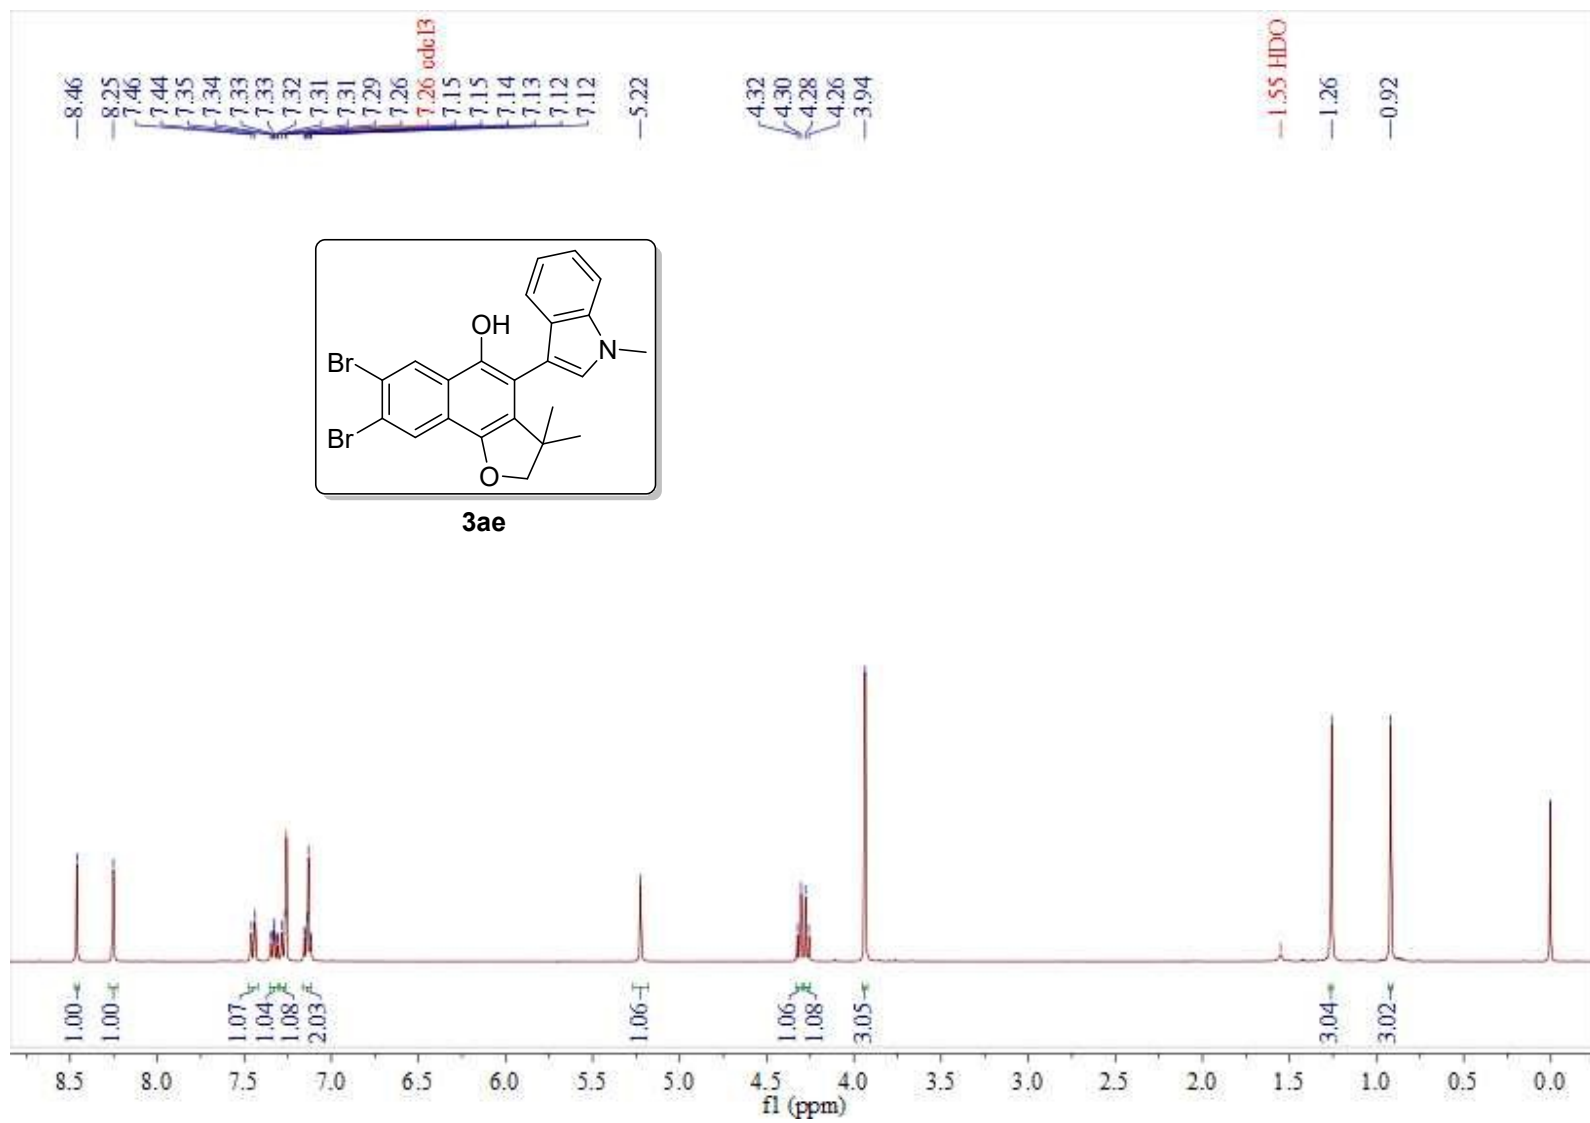

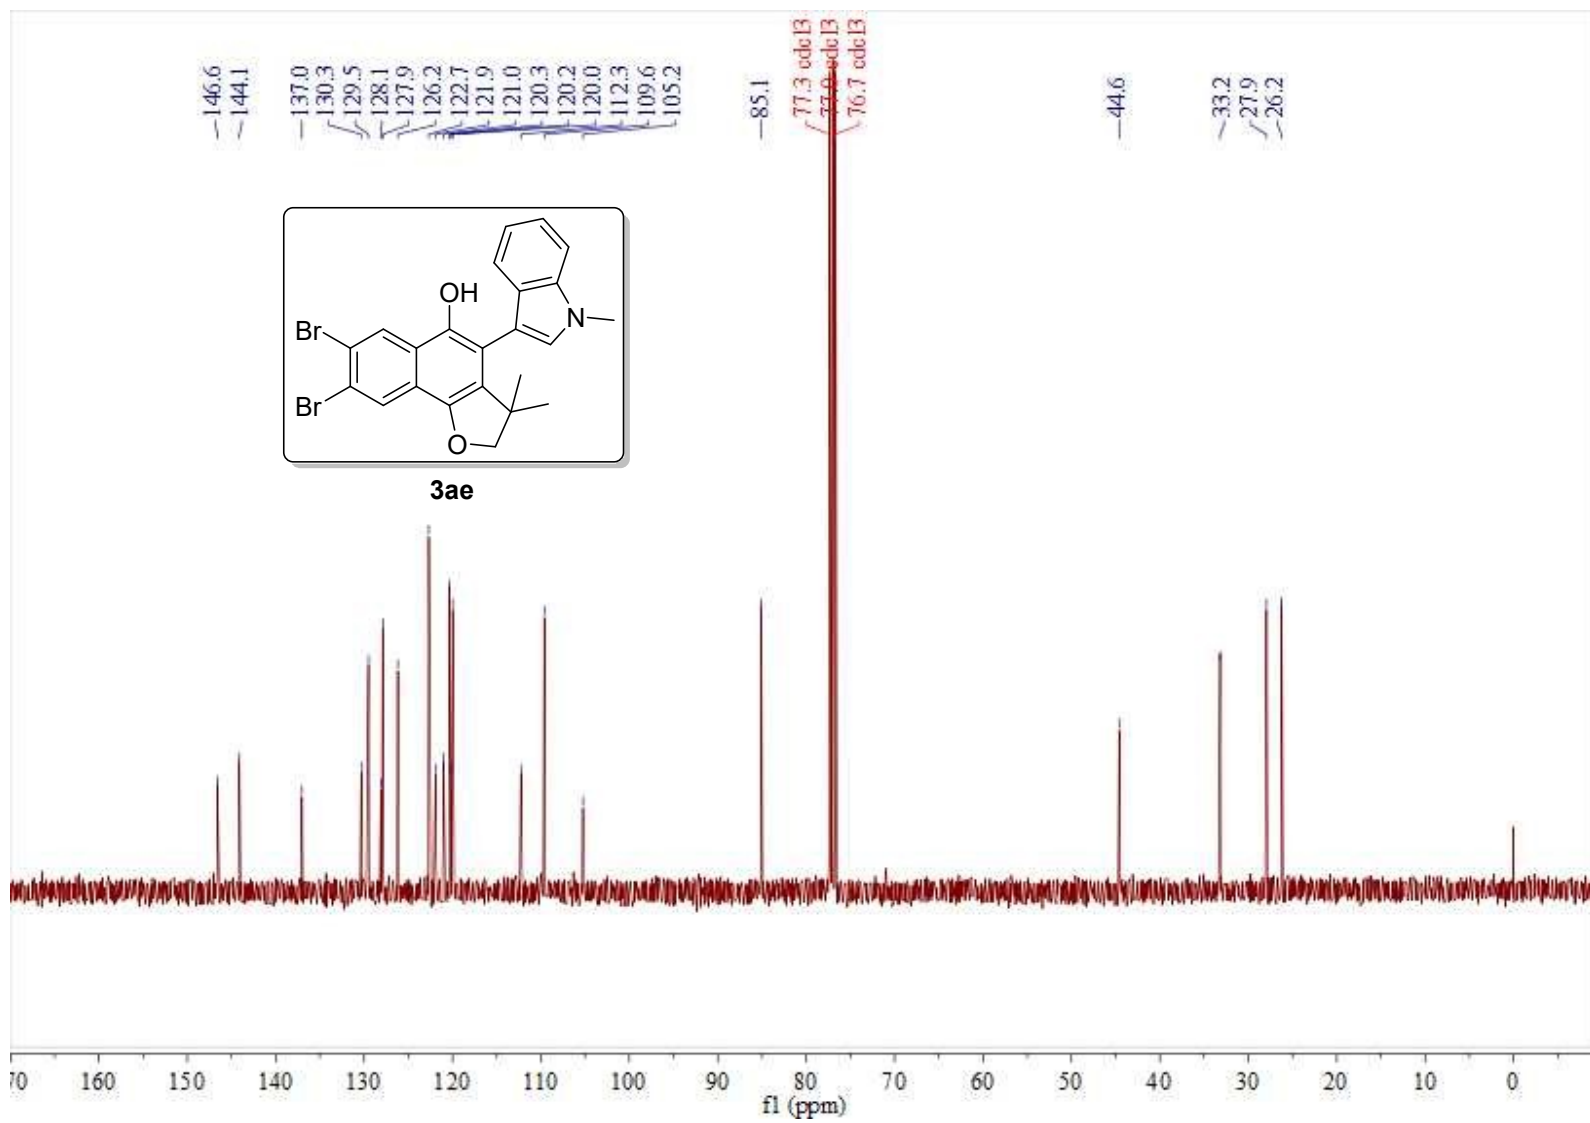

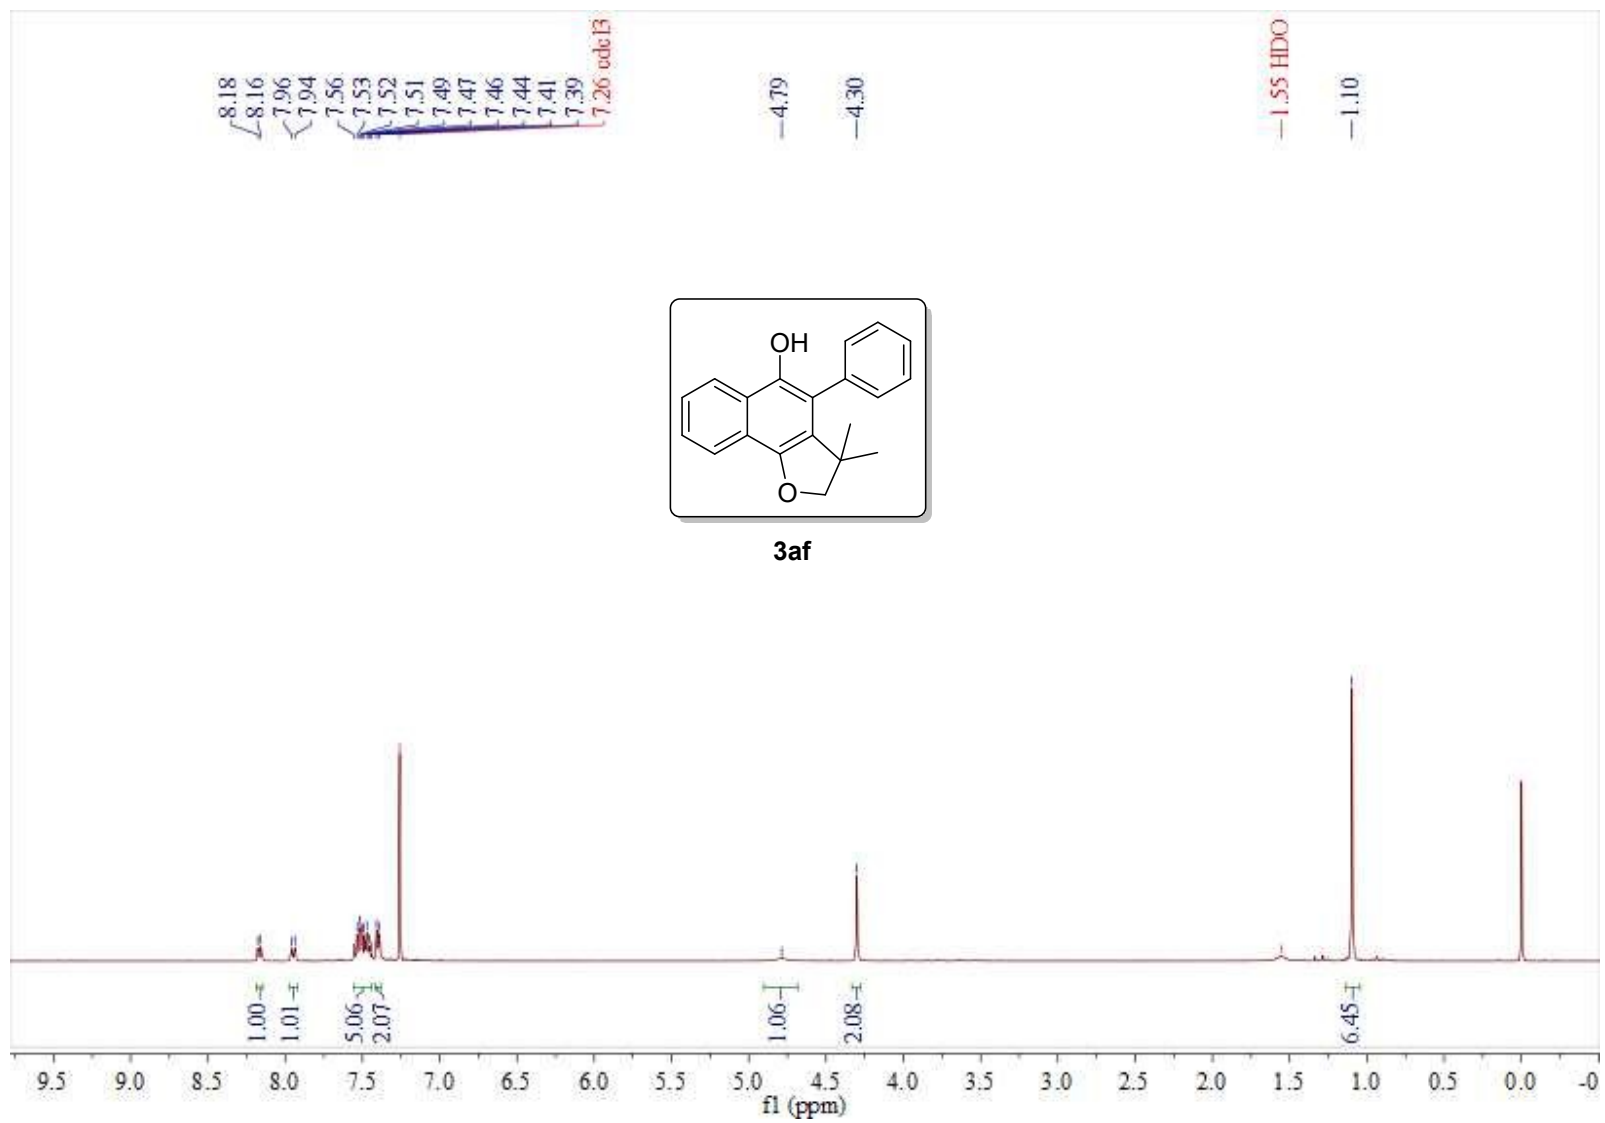

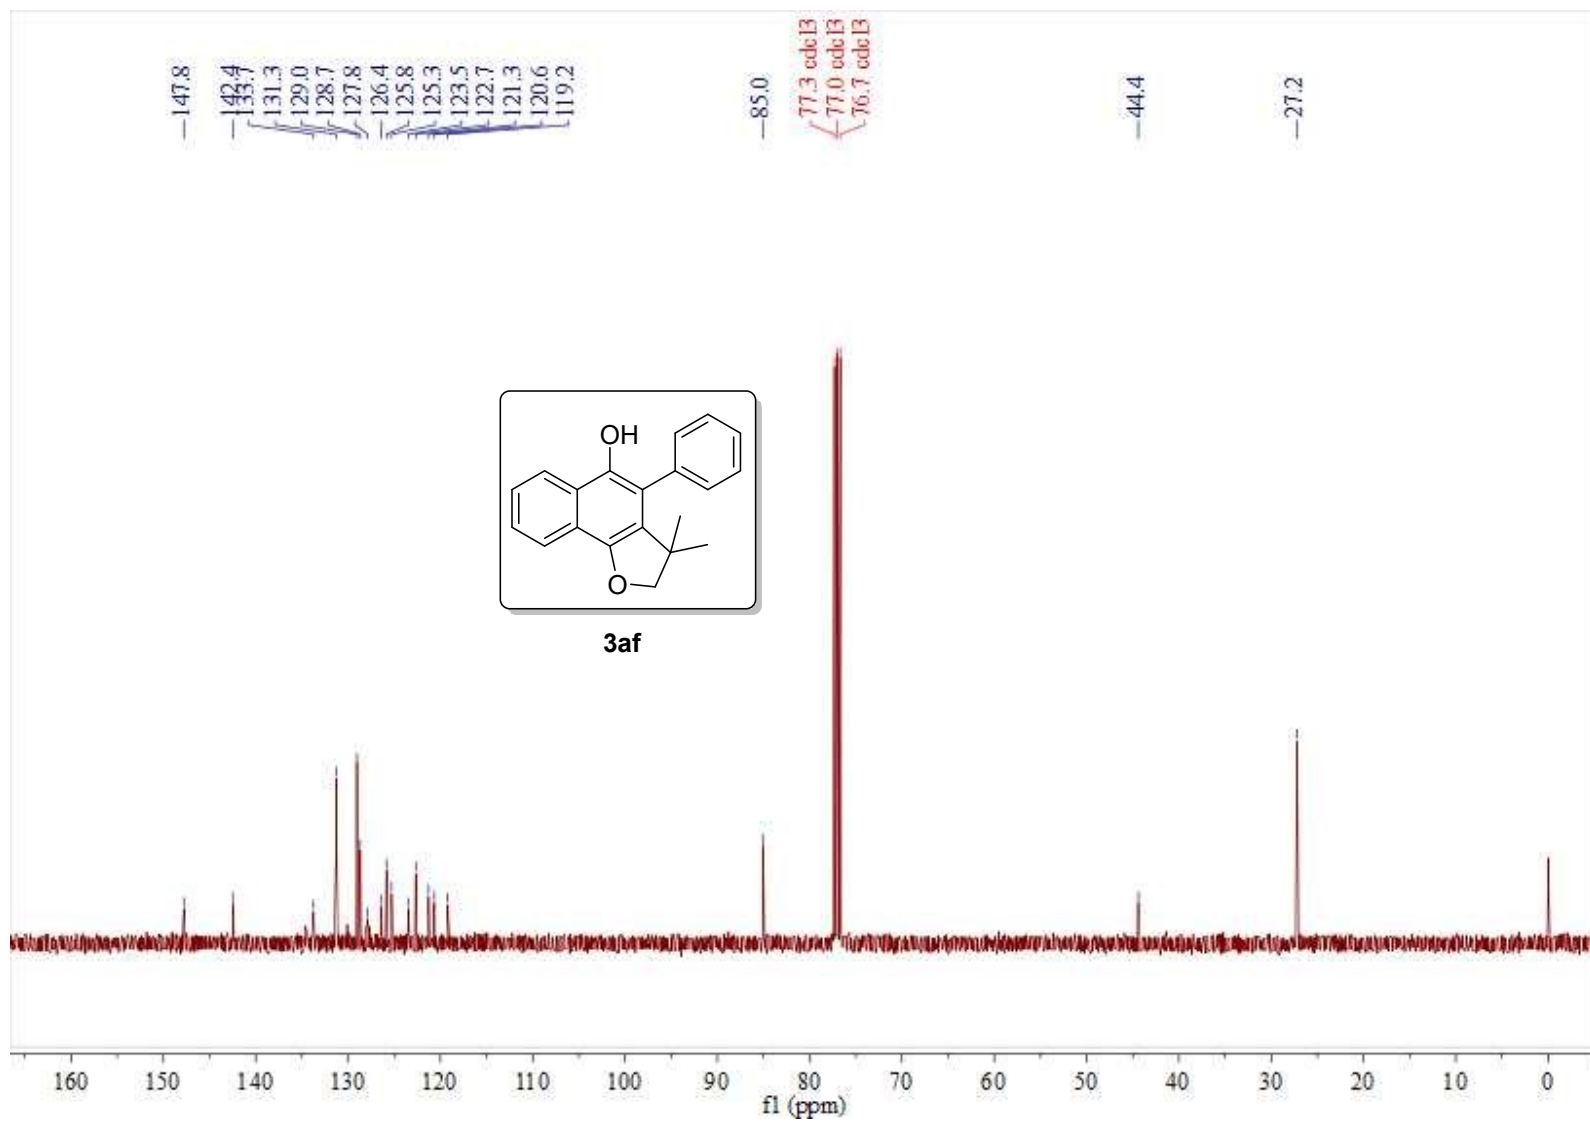



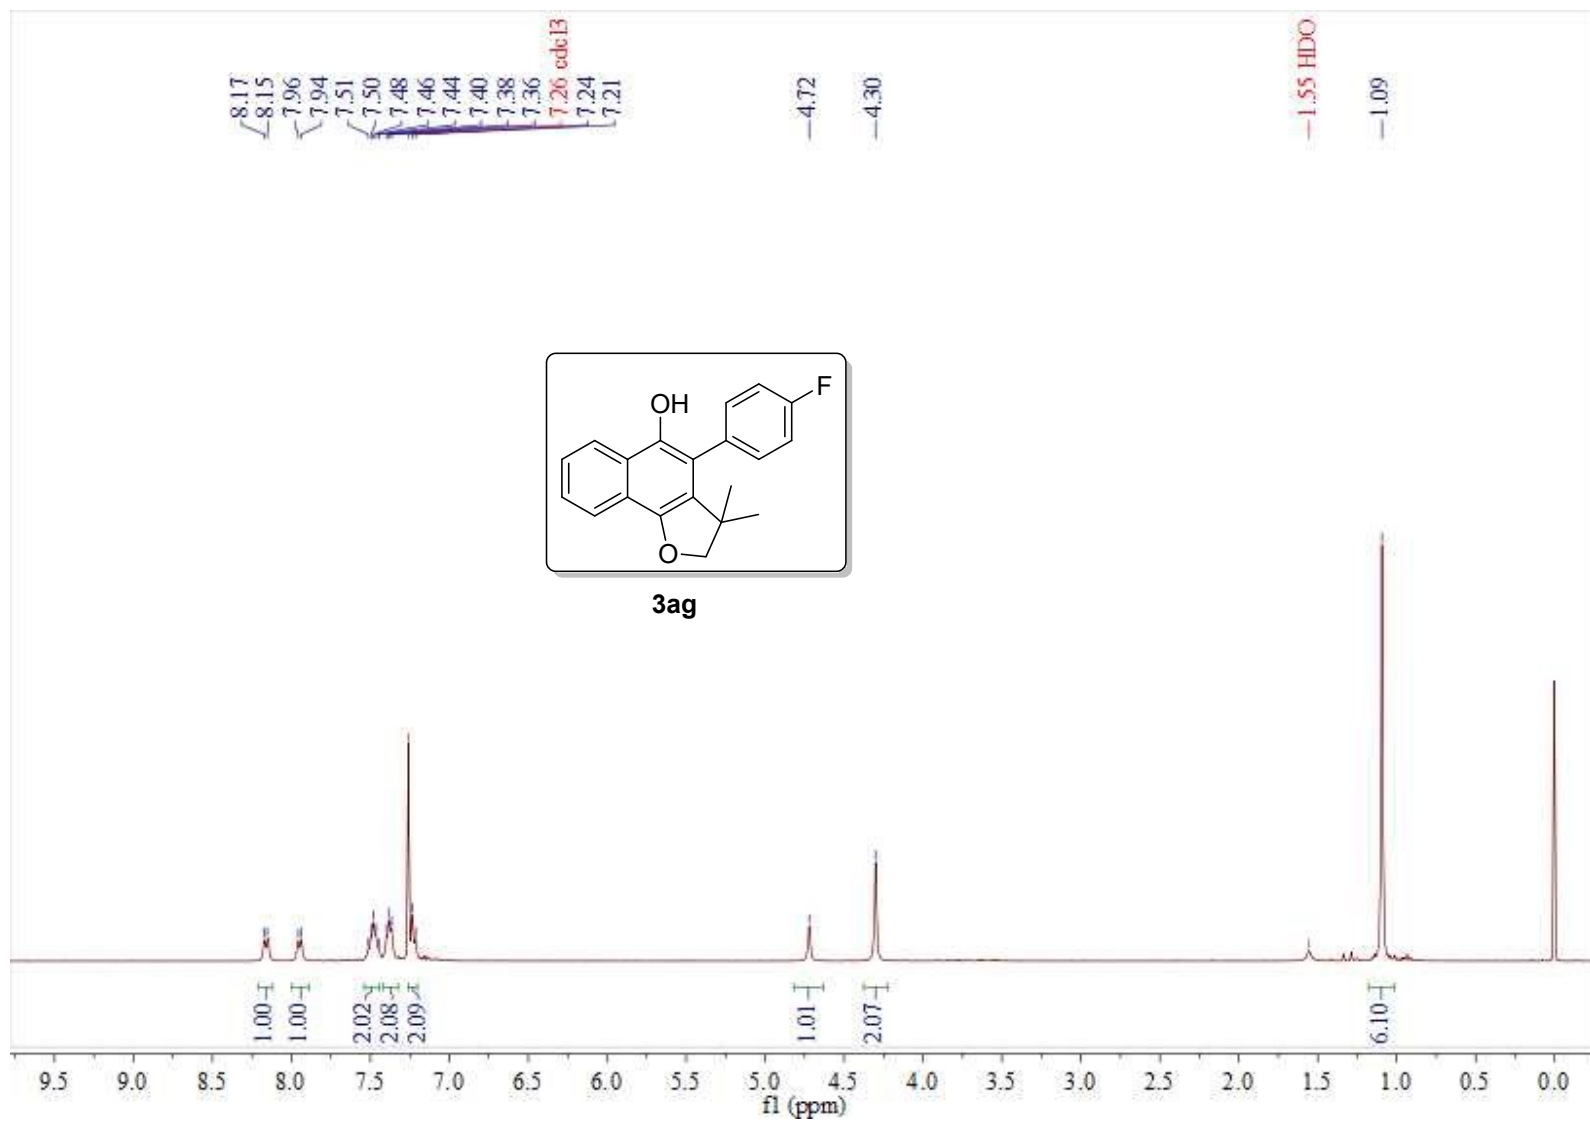

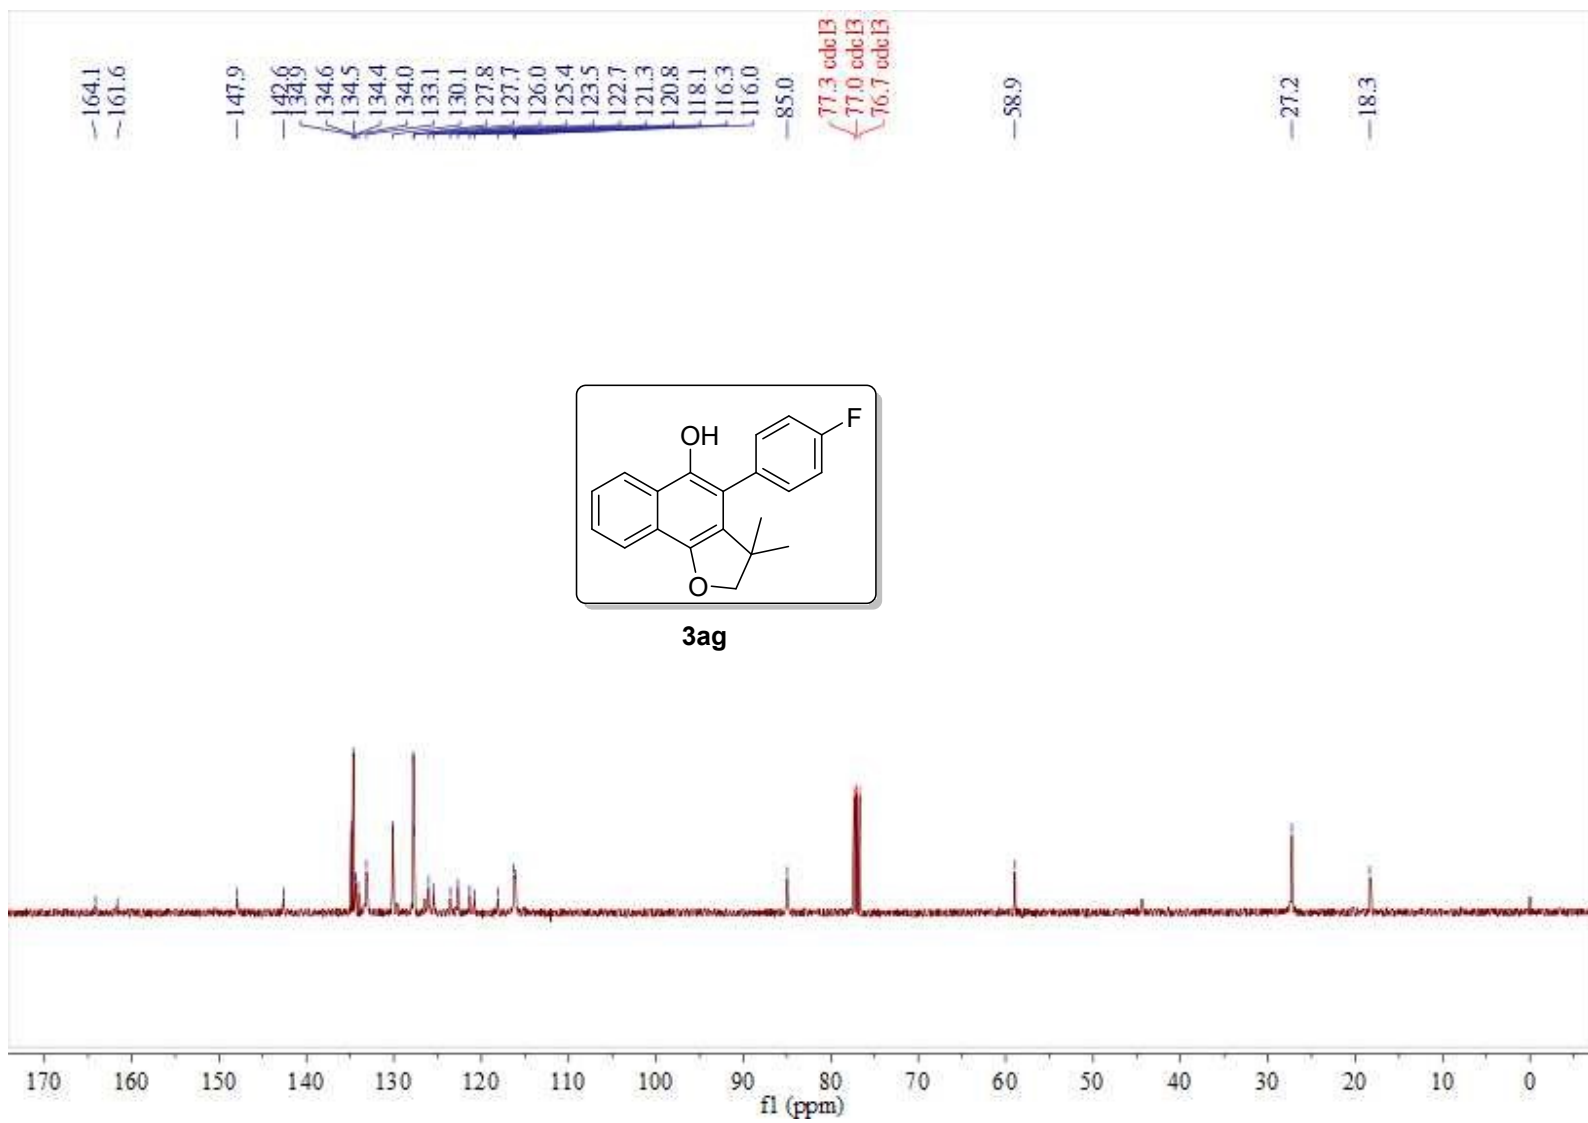

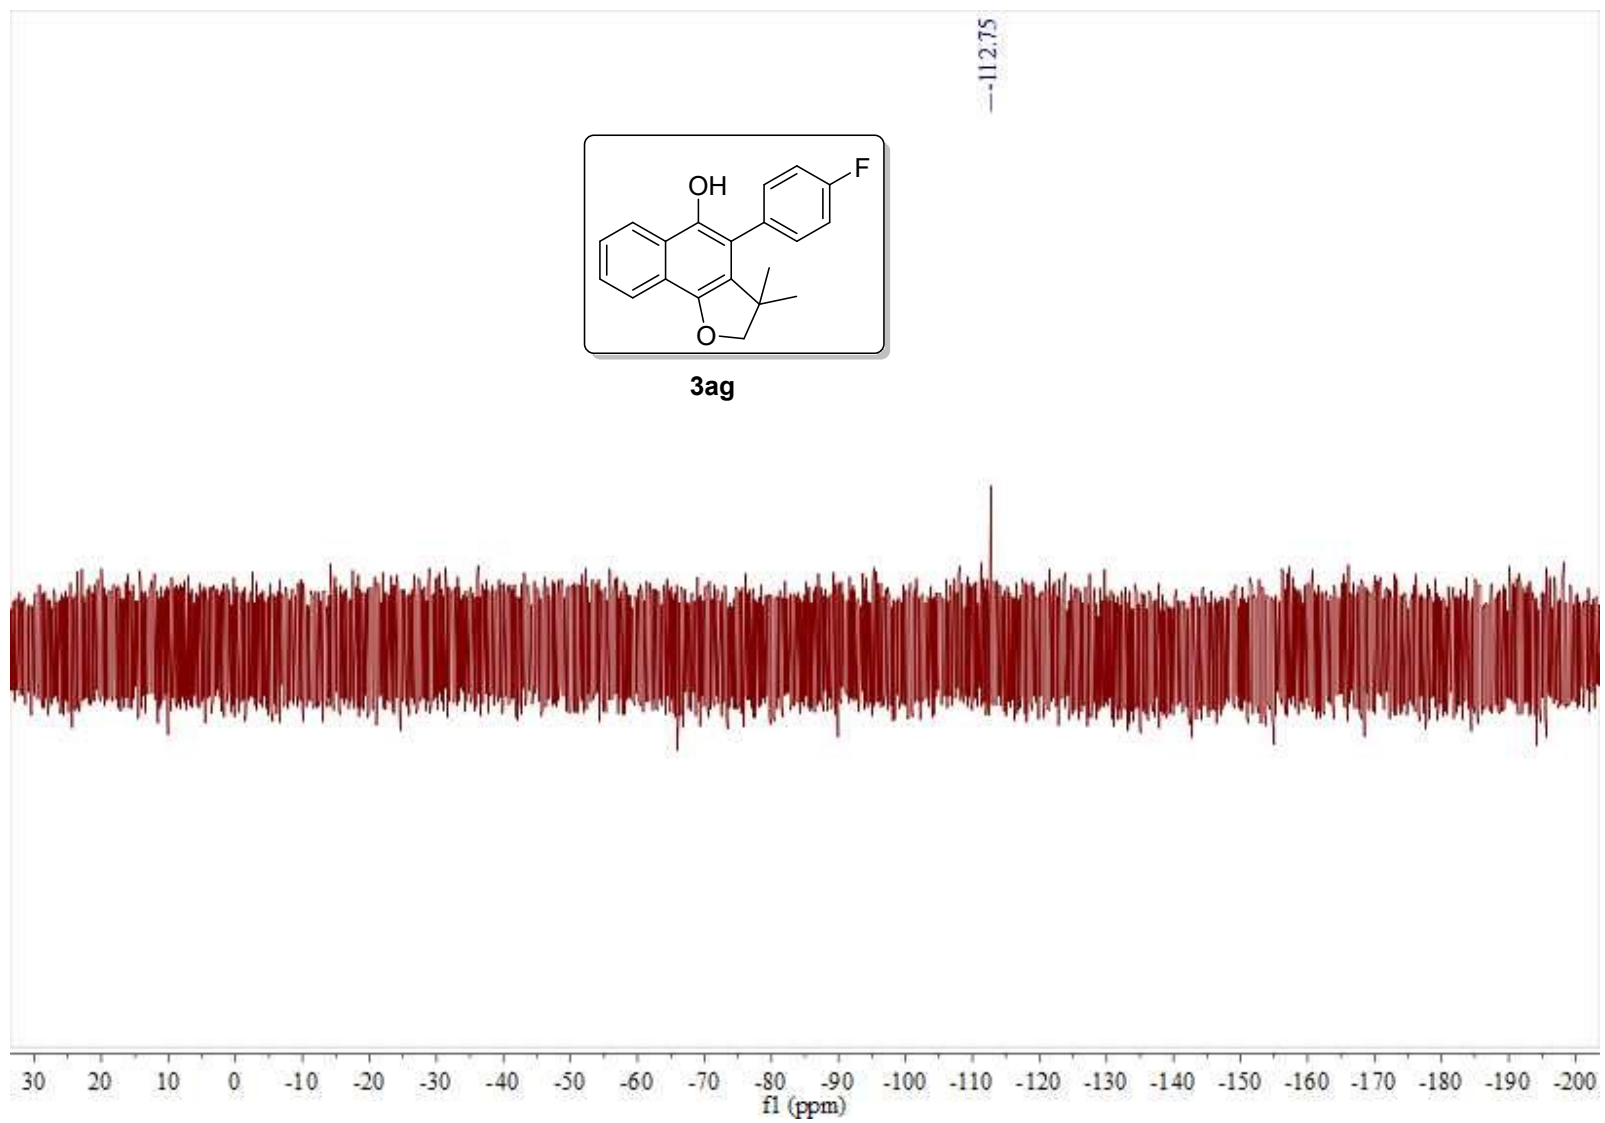

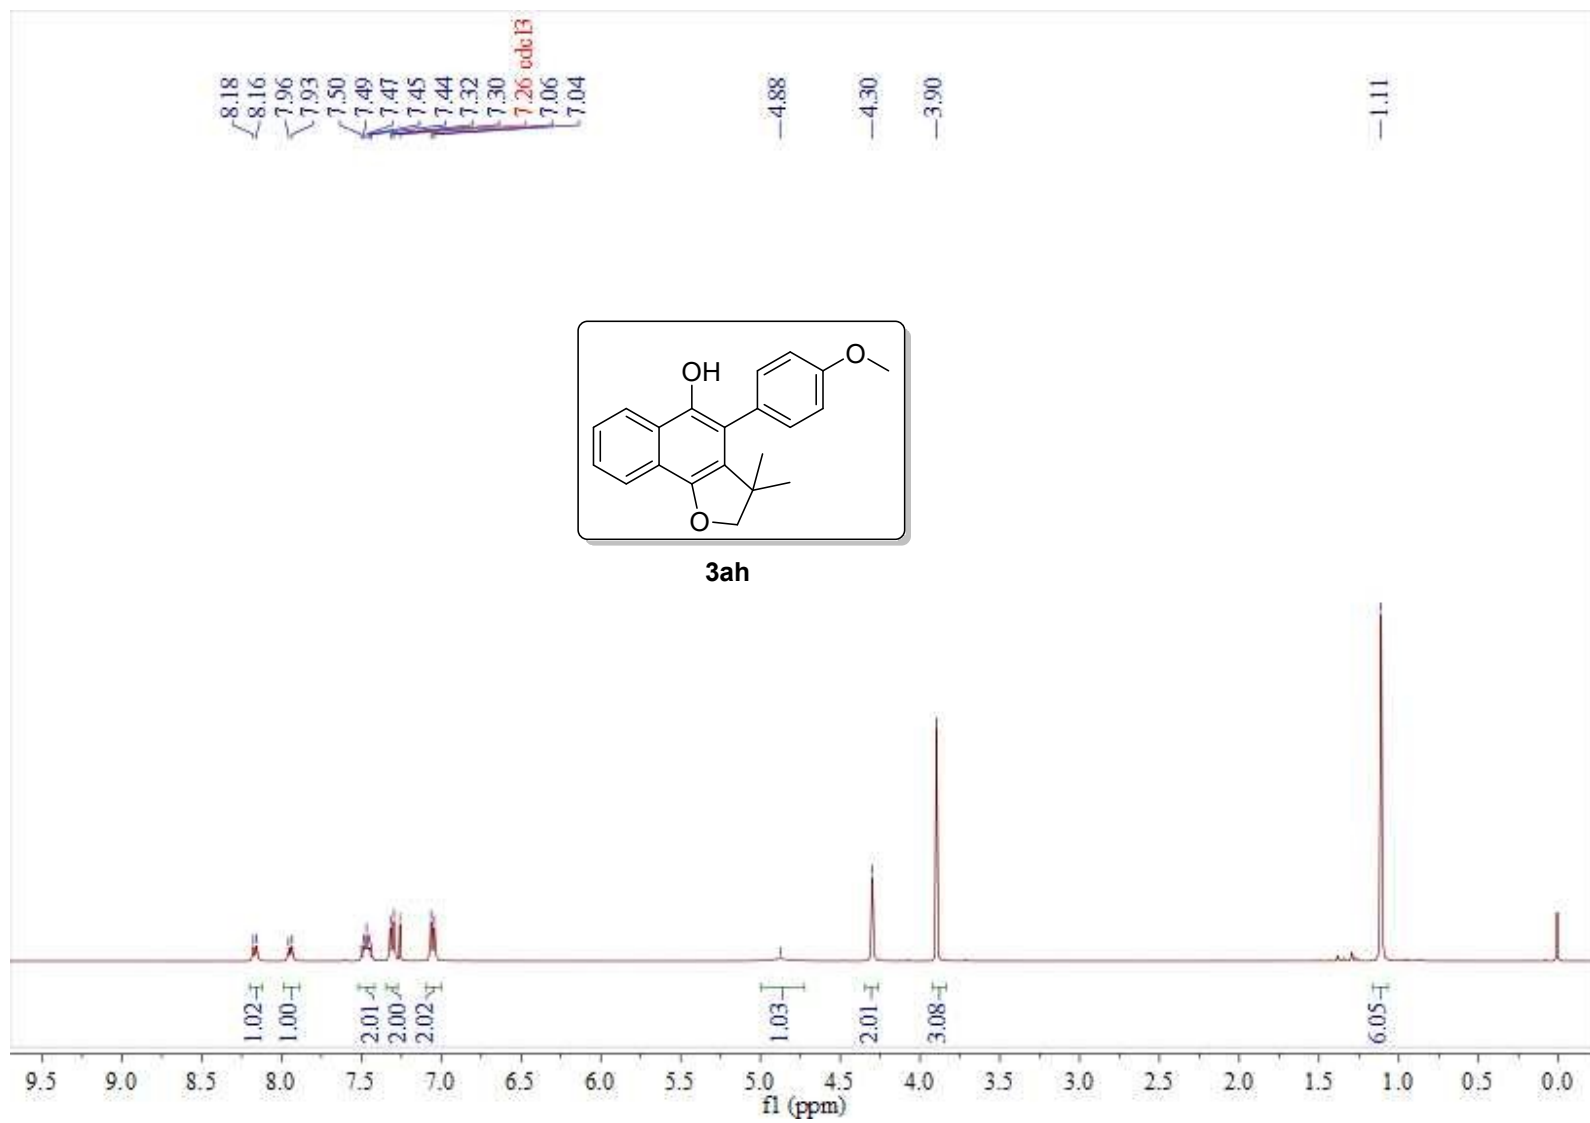

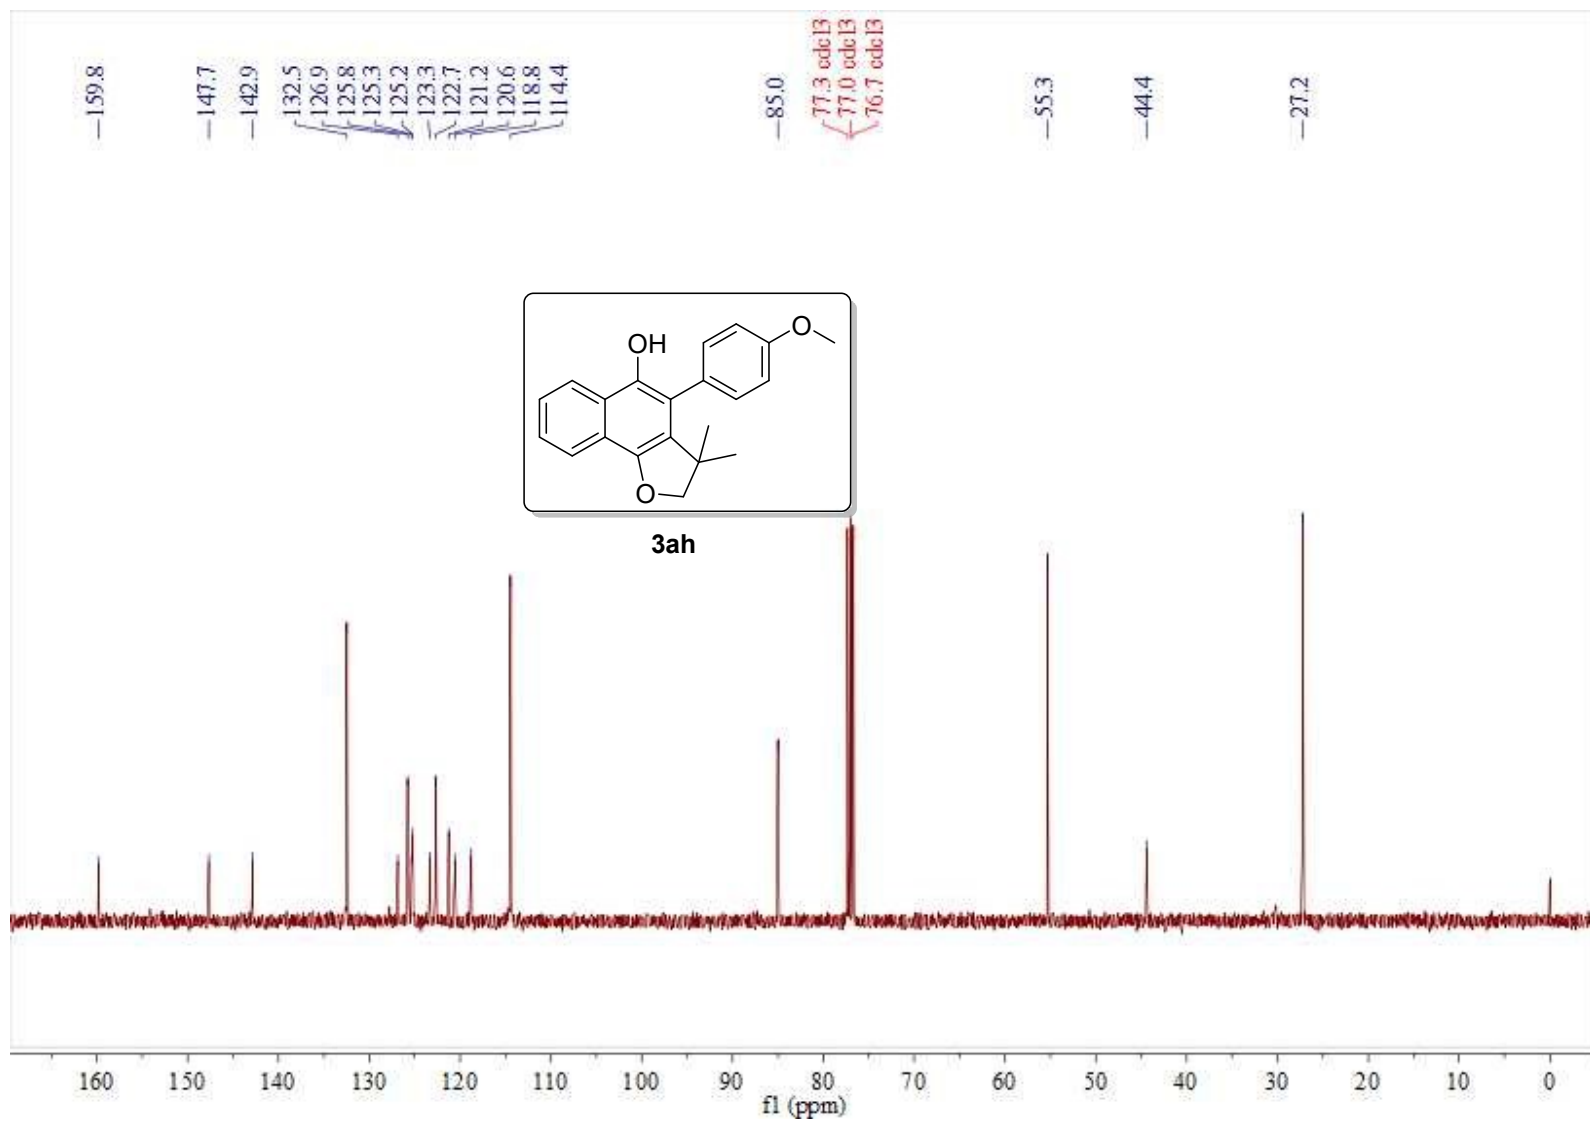

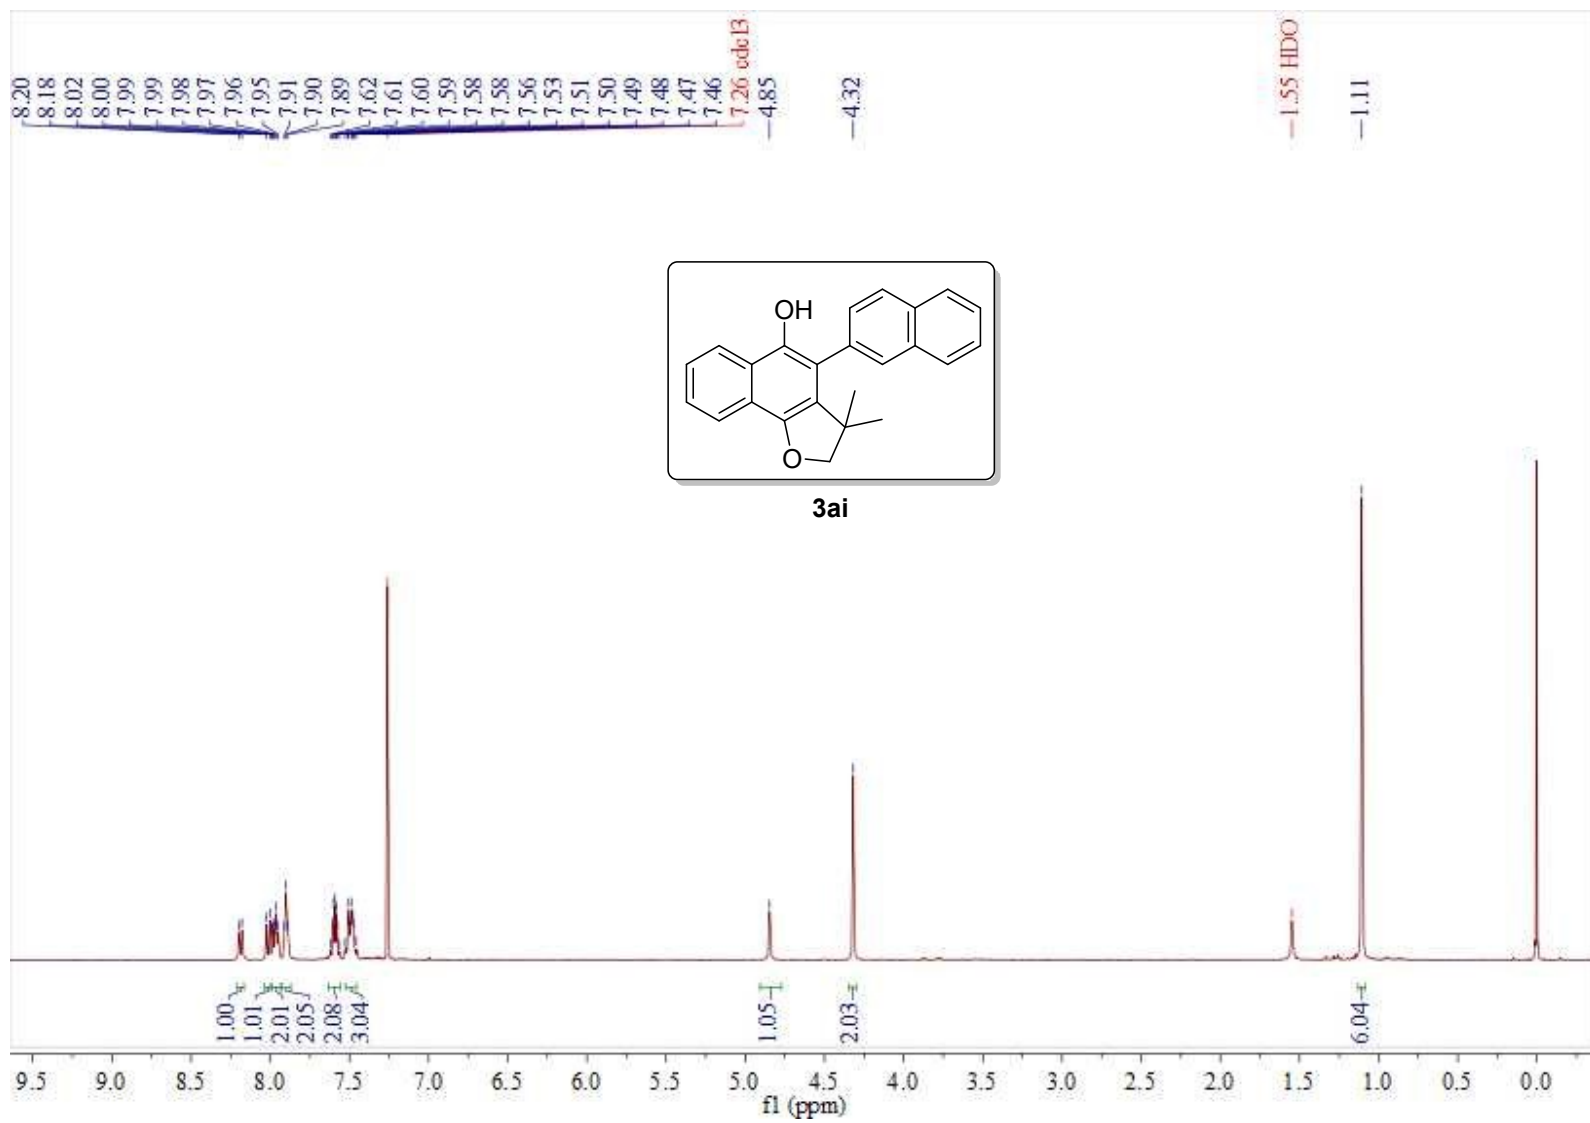

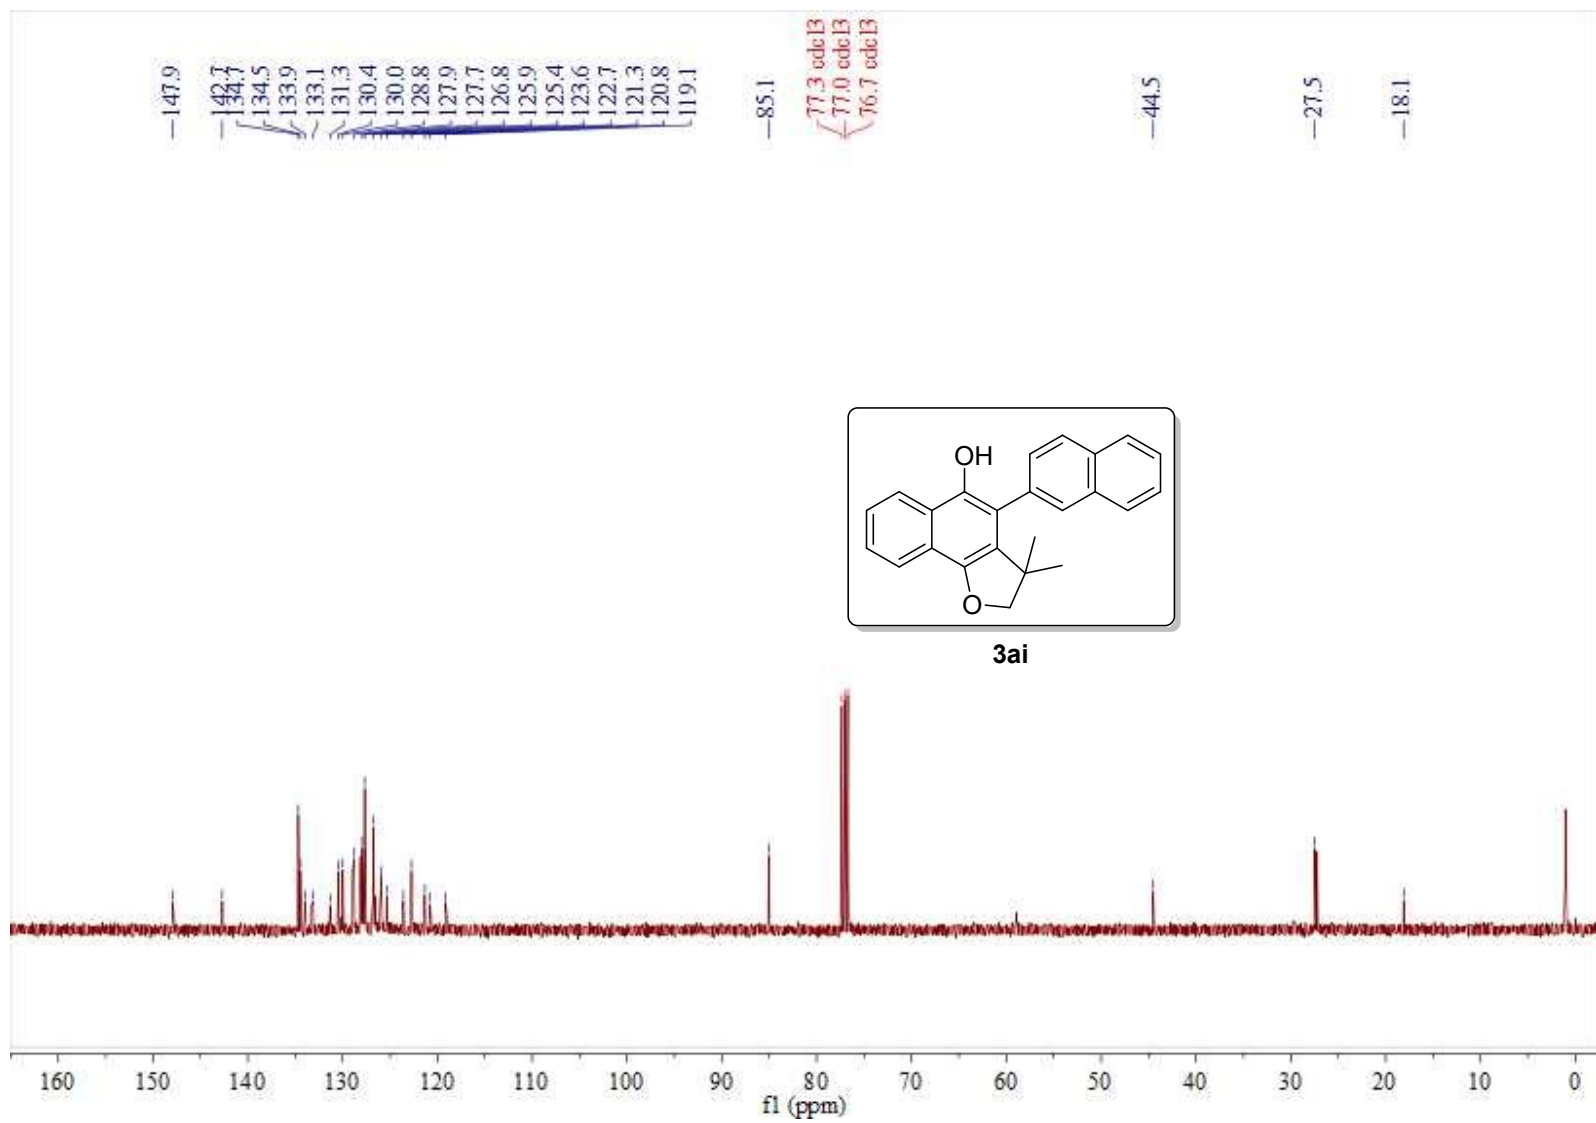

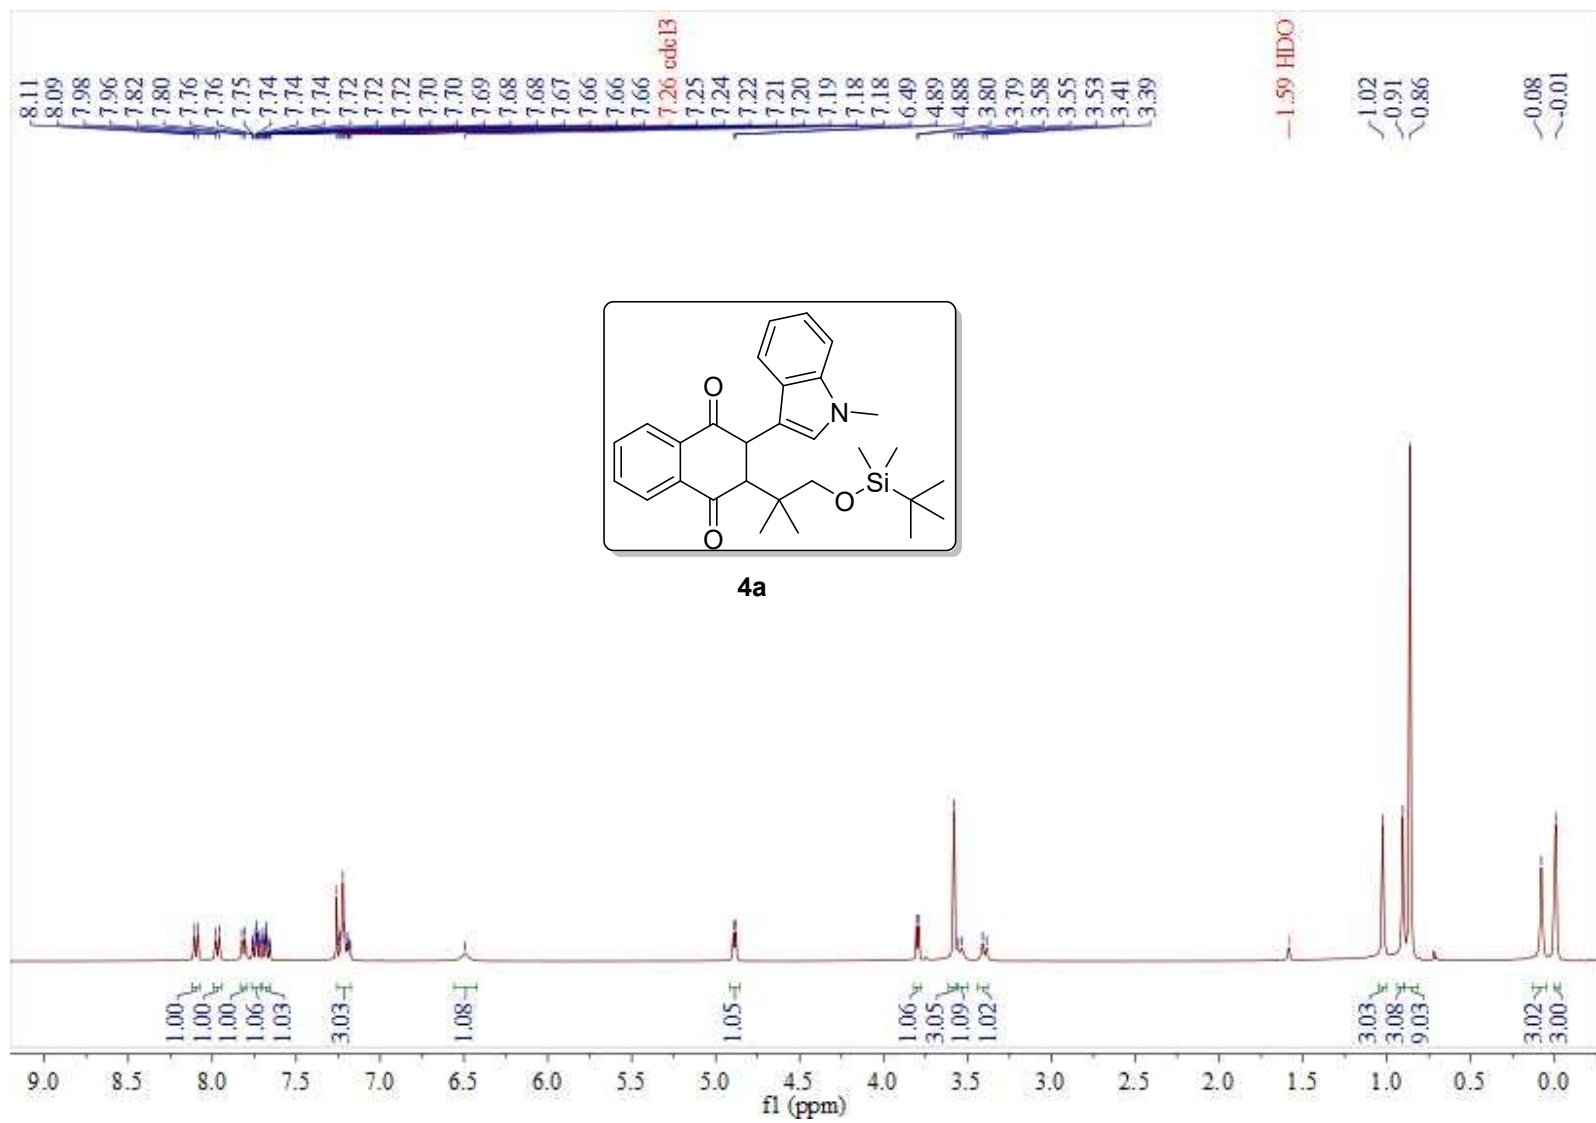



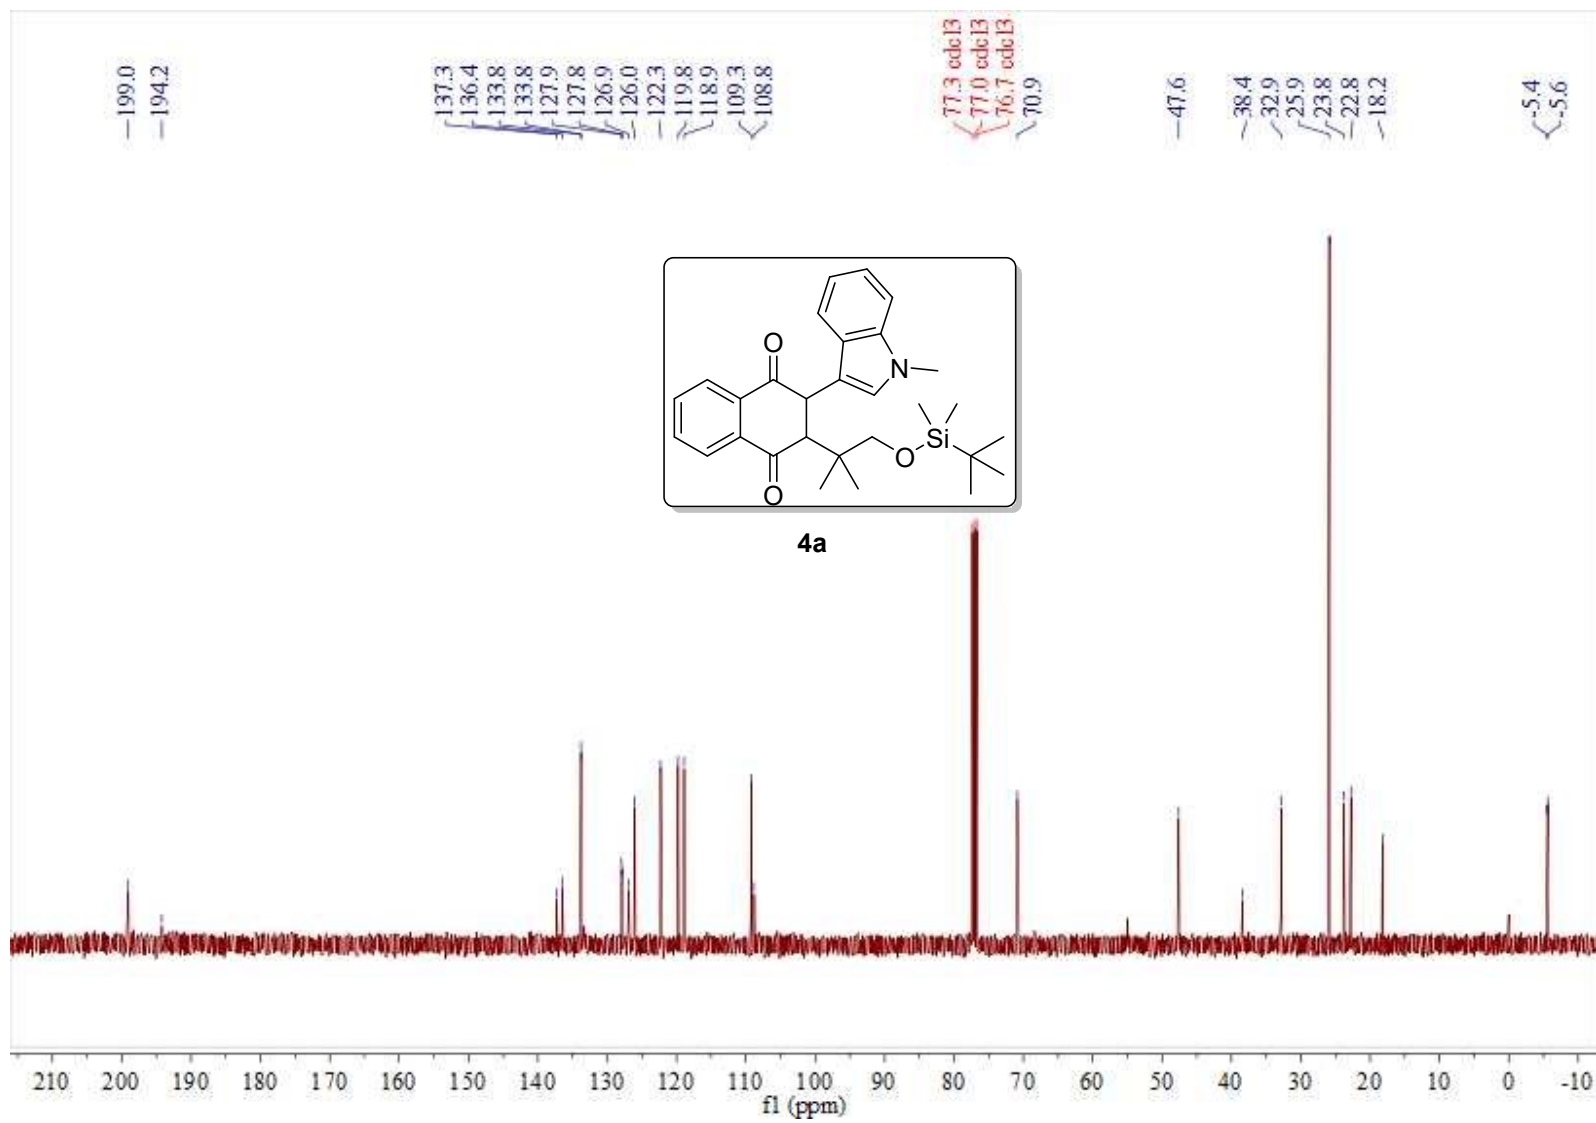

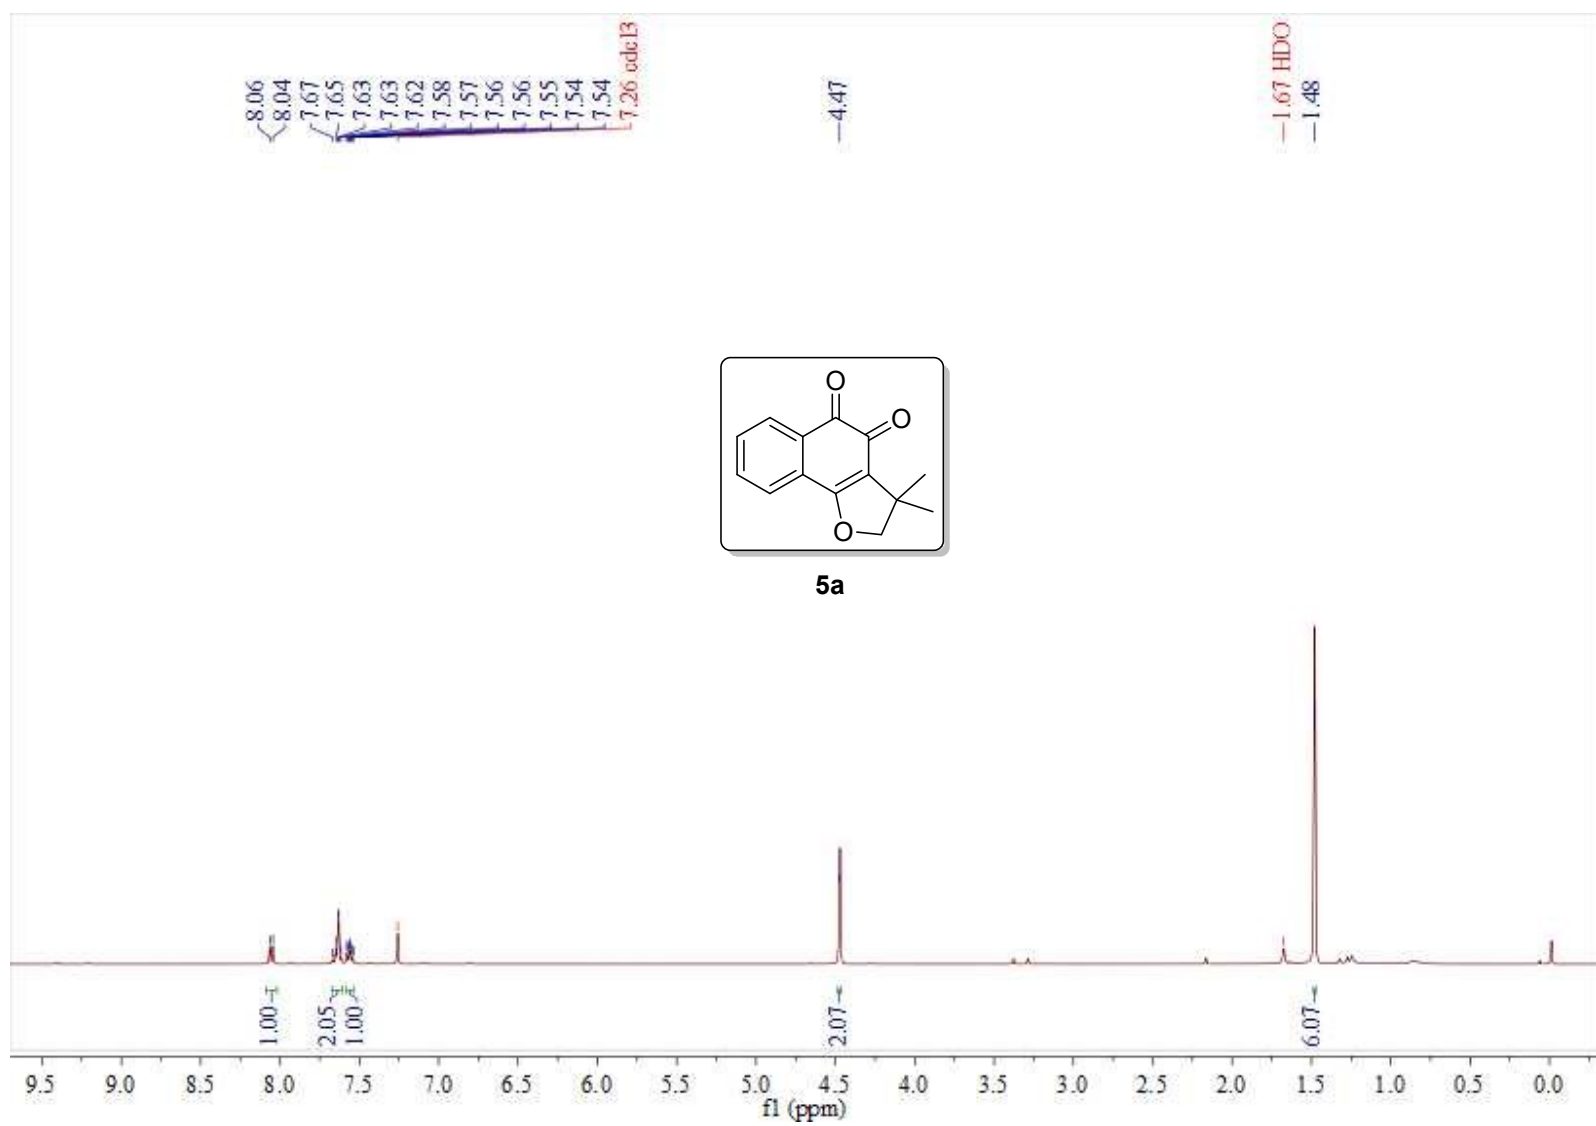

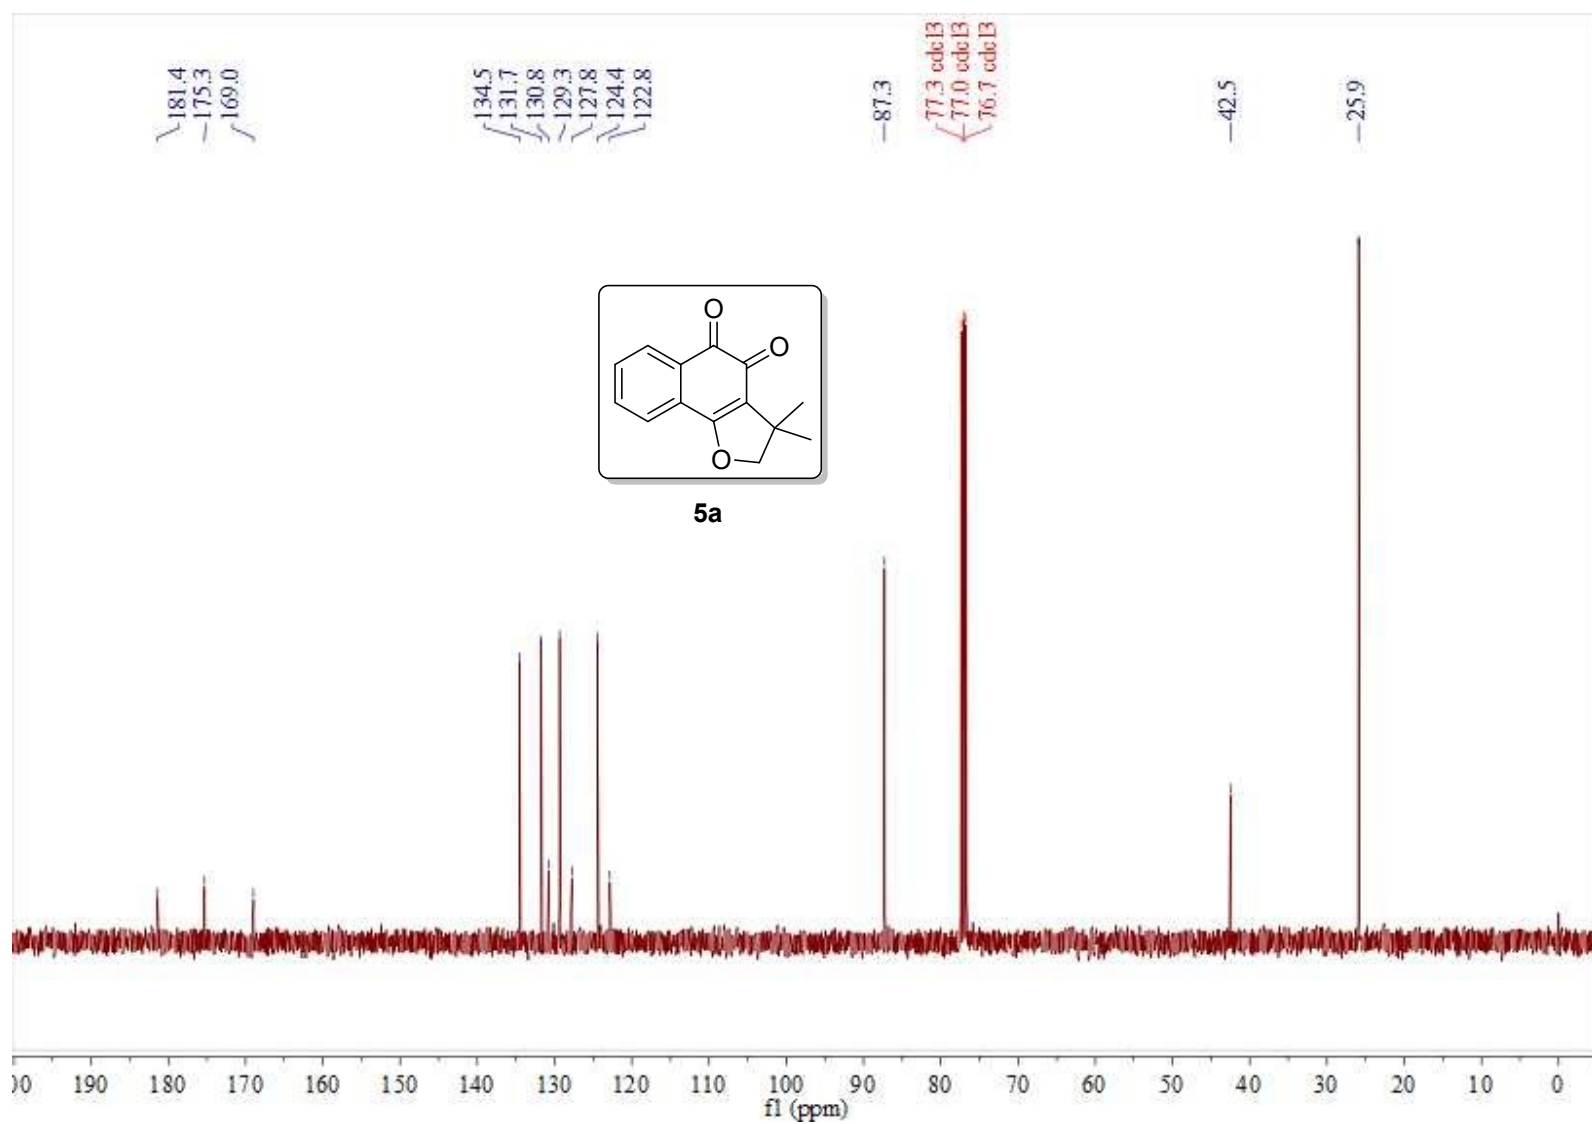

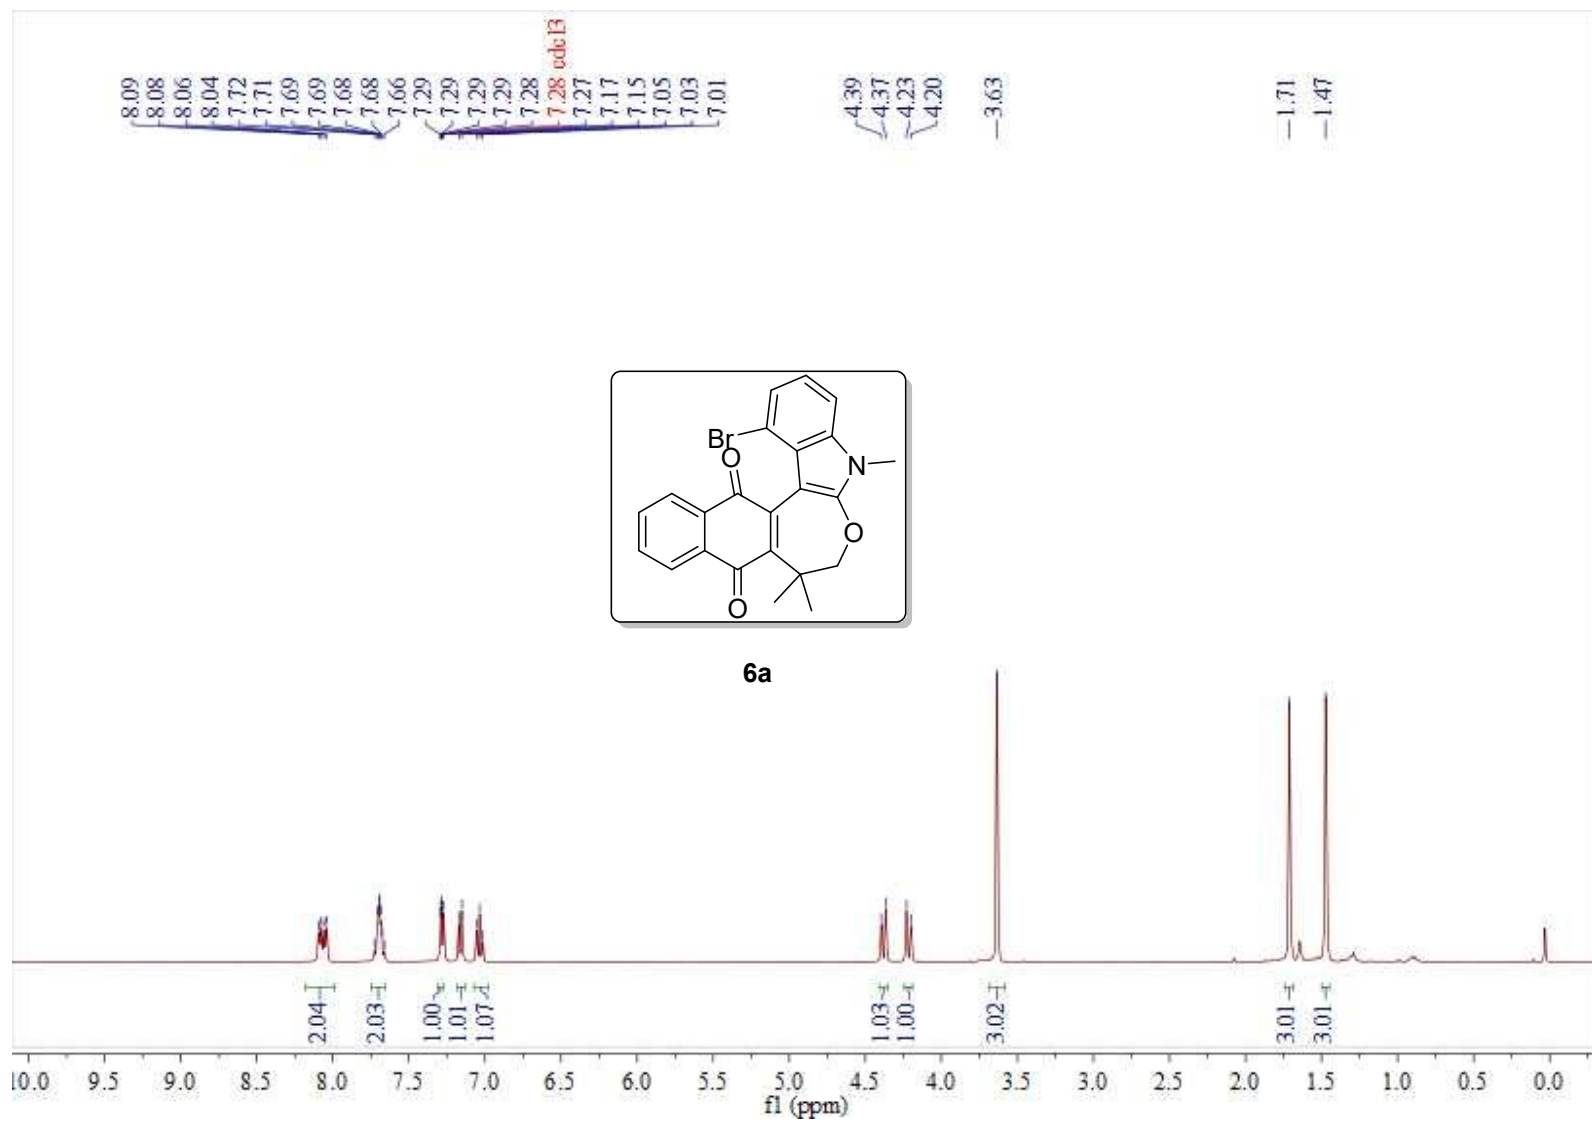

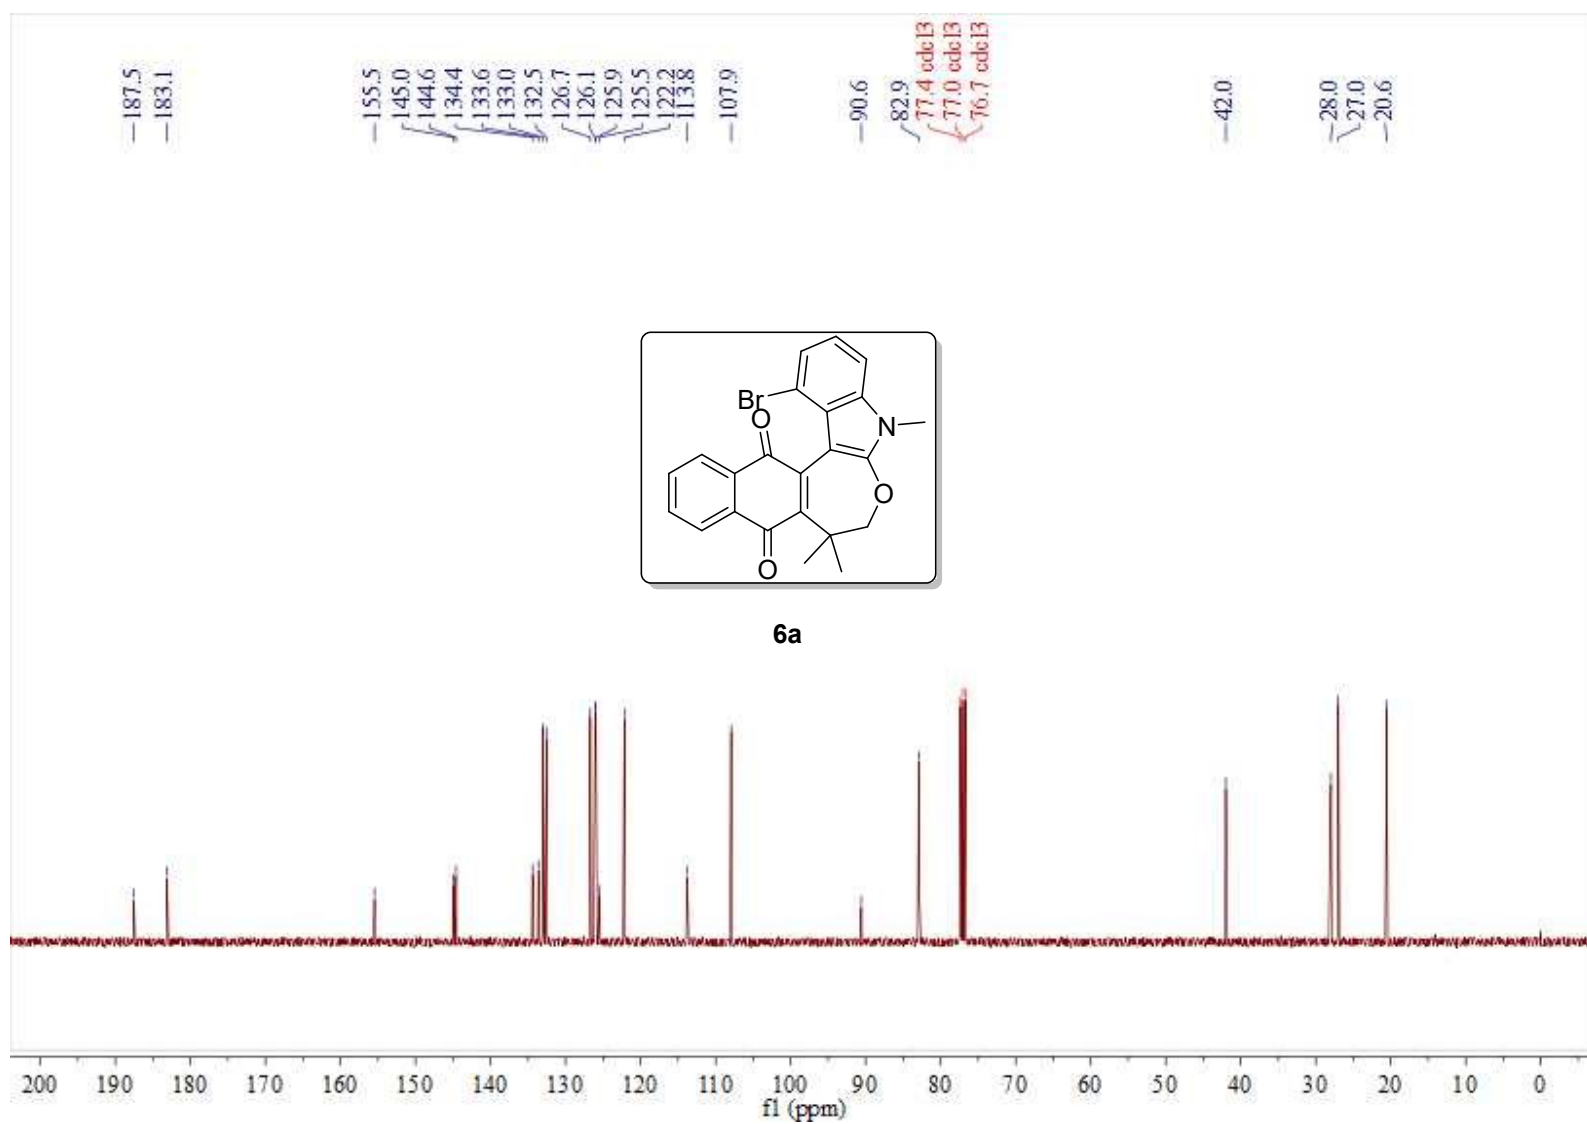

Supplement: d1qo01041g1.pdf [file d1qo01041g1.pdf]
